# Supplementary material for: Personalized Nutrition Using Microbial Metabolite Phenotype to Stratify Participants and Non-Invasive Host Exfoliomics Reveal the Effects of Flaxseed Lignan Supplementation in a Placebo-Controlled Crossover Trial
Source: MDPI journal article supplement (doi:10.3390/nu14122377), 2022-06-08
Supplement: s1 [file s1]

**Table S1. Available Exfoliome Samples.** Number of exfoliome samples available for DE analysis after collection, sequencing and quality control for the lignan supplement and placebo intervention periods among individuals in the high and low ENL groups.

| <b>Sample Type</b> | <b>High ENL</b> | <b>Low ENL</b> |
|--------------------|-----------------|----------------|
| Lignan             | 14              | 15             |
| Placebo            | 13              | 12             |
| Paired             | 11              | 9              |
| Unpaired           | 5               | 9              |

**Table S2. Linear Discriminate Analysis Genes.** List of 840 *a priori* genes related to the gene-regulatory processes in the human gut and detected in the exfoliome samples used for Linear Discriminant Analysis.

|         |          |         |         |         |        |          |
|---------|----------|---------|---------|---------|--------|----------|
| AATF    | CDC42EP3 | FGF5    | IGF2    | MYO9B   | PTGS2  | SLC5A3   |
| ABCB1   | CDCA7    | FGF9    | IGF2BP1 | NAA10   | PTK2   | SLC5A8   |
| ABCC1   | CDCP1    | FGFBP1  | IGFBP3  | NAIP    | PTK2B  | SLC5A9   |
| ABCG2   | CDH1     | FGFR1   | IHH     | NANOG   | PTK7   | SLC6A14  |
| ABCG5   | CDH2     | FGFR2   | IKBKAP  | NCAM1   | PTPN11 | SLC6A19  |
| ABHD5   | CDH3     | FGFR3   | IKBKB   | NEU3    | PTPN2  | SLC6A20  |
| ACADS   | CDH5     | FLNB    | IL13RA1 | NEUROD1 | PTPN22 | SLC6A6   |
| ACAT1   | CDK15    | FLT1    | IL18    | NFE2L2  | PTPN6  | SLC7A11  |
| ACKR2   | CDK2     | FN1     | IL1A    | NFIL3   | PTPRD  | SLC7A6   |
| ACSL4   | CDK2AP1  | FOS     | IL1B    | NFKB1   | PYGO2  | SLC7A7   |
| ACTA1   | CDK7     | FOXA1   | IL1R1   | NFKB2   | RAC1   | SLC7A9   |
| ACTA2   | CDK8     | FOXA2   | IL1R2   | NIFK    | RAD51D | SLC9A2   |
| ACTB    | CDKAL1   | FOXA3   | IL22RA1 | NOD2    | RAD52  | SLC9A3R1 |
| ACTC1   | CDKN1A   | FOXC1   | IL23R   | NOG     | RASSF1 | SLC9A8   |
| ACTG1   | CDKN1B   | FOXD2   | IL2RB   | NOS1    | RB1    | SLCO2A1  |
| ACTG2   | CDKN1C   | FOXJ2   | IL2RG   | NOS2    | RBBP9  | SLFN5    |
| ADAM10  | CDKN2A   | FOXJ3   | IL36RN  | NOTCH1  | RBL1   | SMAD3    |
| ADAM17  | CDKN2B   | FOXK2   | IL4R    | NOTCH3  | RBL2   | SMAD7    |
| ADAM9   | CDX1     | FOXO1   | IL6ST   | NOTCH4  | RBP4   | SMPD1    |
| ADAMTS4 | CDX2     | FOXO3   | ILF2    | NPAT    | RBPJ   | SOCS2    |
| ADRB1   | CEACAM1  | FOXP1   | ILF3    | NR2C2   | RCN3   | SOCS6    |
| AGPAT3  | CEACAM19 | FOXP2   | ILKAP   | NR3C1   | REG1A  | SOD1     |
| AIFM2   | CEACAM3  | FOXP4   | INSR    | NR5A2   | REG1B  | SOD2     |
| AKTIP   | CEACAM5  | FPR1    | IRF8    | NR6A1   | REG3A  | SORD     |
| ALCAM   | CEACAM6  | FSTL1   | ISL1    | NRAS    | REG4   | SOX4     |
| ALDH1A1 | CEACAM7  | FTH1    | ITGAL   | NRCAM   | REL    | SOX9     |
| ALOX15  | CEBPB    | FTL     | ITGAM   | NRIP1   | RELA   | SP1      |
| ALPI    | CFLAR    | FUT2    | ITGB1   | NTHL1   | RELB   | SPDEF    |
| AMPD3   | CFTR     | FZD7    | ITGB2   | NTS     | REST   | SPI1     |
| ANGPTL4 | CGNL1    | G6PD    | ITLN1   | NUMB    | RHOB   | SPIB     |
| ANXA1   | CHAC1    | GABRB3  | JAG1    | NUPR1   | RIPK1  | SPP1     |
| ANXA3   | CHGA     | GADD45A | JAK1    | OAT     | ROCK1  | SPPL3    |
| ANXA5   | CHI3L1   | GADD45B | JAK2    | OCLN    | RPS4X  | SPRY2    |
| APC     | CHP1     | GATA6   | JUN     | ODC1    | RPSA   | SQSTM1   |
| APEX1   | CKAP4    | GCLC    | KCNH2   | OGG1    | RUNX2  | SREBF2   |
| APOA1   | CKS2     | GCLM    | KCNS3   | OLFM4   | RUNX3  | SST      |
| APOB    | CLDN3    | GCM1    | KCTD12  | ORMDL3  | RXRA   | STAT3    |
| APOC3   | CLDN4    | GCNT3   | KCTD17  | OTUB1   | S100A8 | STIM1    |
| APP     | CLDN8    | GDF15   | KDM4A   | P2RX4   | S100A9 | STK11    |
| AQP11   | COL1A1   | GEMIN6  | KDM4B   | P4HA1   | SAR1B  | SYP      |
| AQP3    | COL1A2   | GJB1    | KDM4C   | P4HB    | SAT2   | TAT      |
| AQP7    | COL3A1   | GJB2    | KDM5A   | PAG1    | SCD    | TAZ      |
| AQP8    | COL6A3   | GJC1    | KEAP1   | PARD3   | SCNN1A | TBRG1    |
| ARNT    | COLEC12  | GJD2    | KIT     | PARK7   | SCNN1B | TCF4     |
| ARRB2   | COMMD3   | GNL1    | KITLG   | PAWR    | SCP2   | TCF7L2   |

|          |        |         |          |          |          |           |
|----------|--------|---------|----------|----------|----------|-----------|
| ATF3     | COX4I1 | GPX1    | KLF4     | PAX6     | SDC1     | TCN2      |
| ATF4     | COX5B  | GPX2    | KLF6     | PCDH7    | SELL     | TDG       |
| ATG16L1  | CSPG5  | GPX4    | KLK1     | PCNA     | SEPTIN4  | TFAP2A    |
| ATG5     | CTDSPL | GRB7    | KLK6     | PDE4A    | SERPINA1 | TFAP2C    |
| ATOH1    | CTNNA1 | GREM1   | KRAS     | PDE4B    | SERPINB2 | TFCP2L1   |
| ATP2A3   | CTNNB1 | GSK3A   | KRT19    | PDE4C    | SERPINH1 | TFF3      |
| ATP5B    | CTNND1 | GSN     | KRT8     | PDE4D    | SFN      | TFRC      |
| ATP8A1   | CXADR  | GSR     | LAMA1    | PDE6D    | SHH      | TGFA      |
| AXIN1    | CXCL1  | GSS     | LAMB1    | PDK1     | SIGIRR   | TGFB2     |
| AXIN2    | CXCL16 | GSTA1   | LAMC2    | PDX1     | SIRT1    | TGFBR2    |
| BACH1    | CXCL2  | GSTA4   | LAMP1    | PDZK1IP1 | SLC10A2  | TGM2      |
| BAD      | CXCL3  | GSTM3   | LATS2    | PECAM1   | SLC13A1  | TGM4      |
| BAK1     | CXCR2  | GSTP1   | LCT      | PIK3CA   | SLC13A2  | THBS1     |
| BAMBI    | CXCR4  | GUCA2A  | LDHB     | PIK3R1   | SLC16A1  | THRA      |
| BAX      | CYB5R1 | GUCA2B  | LEF1     | PIWIL2   | SLC16A3  | TIMP3     |
| BBC3     | CYBB   | HAS2    | LGALS3   | PKM      | SLC16A4  | TJP1      |
| BCL10    | CYP4F2 | HAS3    | LGALS3BP | PKN2     | SLC16A9  | TJP2      |
| BCL2     | CYP4F3 | HCAR2   | LGR4     | PLA2G10  | SLC17A5  | TJP3      |
| BCL2A1   | DAB2IP | HDAC1   | LIFR     | PLA2G2A  | SLC1A1   | TLR2      |
| BCL2L1   | DAPK1  | HDAC2   | LIG3     | PLA2G4B  | SLC1A4   | TLR3      |
| BCL2L11  | DAPK2  | HES1    | LIN28A   | PLA2G4C  | SLC20A1  | TLR4      |
| BCL2L13  | DAPK3  | HEY1    | LMNB2    | PLA2G4D  | SLC22A23 | TLR5      |
| BCL2L14  | DBI    | HHIP    | LPAR1    | PLA2G7   | SLC23A3  | TNF       |
| BCL2L2   | DBN1   | HIF1A   | LPAR4    | PLAA     | SLC25A13 | TNFAIP1   |
| BCO2     | DCN    | HIF3A   | LRIG1    | PLAT     | SLC25A20 | TNFAIP3   |
| BDKRB2   | DDIT4  | HIST3H3 | LRRK2    | PLAU     | SLC25A28 | TNFRSF10A |
| BECN1    | DDR2   | HLTF    | LTA4H    | PLAUR    | SLC25A33 | TNFRSF10B |
| BIRC2    | DDX11  | HMGA1   | LTBP1    | PLCB2    | SLC25A36 | TNFRSF10D |
| BIRC5    | DDX17  | HMGB1   | LYPD8    | PLCB3    | SLC25A37 | TNFRSF11A |
| BMF      | DDX5   | HMGCL   | LYPLA1   | PLCB4    | SLC25A39 | TNFRSF1A  |
| BMI1     | DEFA5  | HMGCR   | MAB21L2  | PLCD1    | SLC26A2  | TNFRSF1B  |
| BMP2     | DEFA6  | HMGCS1  | MACC1    | PLCD3    | SLC26A3  | TNFRSF21  |
| BMP4     | DFFA   | HMGCS2  | MALL     | PLCE1    | SLC26A6  | TNFSF10   |
| BMPR2    | DHFR   | HMOX1   | MAML1    | PLCG2    | SLC27A2  | TNFSF13B  |
| BRAF     | DHRS9  | HNF4A   | MAML3    | PLD3     | SLC28A1  | TNK2      |
| BRD2     | DLL1   | HNF4G   | MAP2K2   | PLIN2    | SLC28A2  | TOLLIP    |
| BRIX1    | DLL4   | HNRNPA1 | MAPK1    | PLIN3    | SLC2A1   | TP53      |
| BST1     | DNAJB6 | HOPX    | MAPK10   | PLS3     | SLC2A10  | TP63      |
| BTD      | DOT1L  | HOXA10  | MAPK13   | PODXL    | SLC2A13  | TPM3      |
| C11orf30 | DPEP1  | HOXA13  | MAPK14   | POLB     | SLC2A2   | TPT1      |
| CA1      | DPP4   | HOXA2   | MAPK3    | POLG     | SLC2A5   | TRAFD1    |
| CA12     | DPYSL3 | HOXA3   | MAPK6    | POR      | SLC30A4  | TREH      |
| CA13     | DSG2   | HOXA5   | MAPK7    | POU2F3   | SLC30A5  | TRIM31    |
| CA14     | DUOX2  | HOXA9   | MAPK8    | PPAP2A   | SLC30A6  | TSC2      |
| CA2      | DUSP1  | HOXB13  | MAPK9    | PPAP2B   | SLC30A7  | TSC22D1   |
| CA3      | DUT    | HOXB3   | MAX      | PPAP2C   | SLC30A9  | TSC22D3   |
| CA4      | ECM1   | HOXB5   | MEF2C    | PPARD    | SLC31A1  | TSTA3     |

|          |         |         |        |          |         |         |
|----------|---------|---------|--------|----------|---------|---------|
| CA5B     | EFNB1   | HOXB6   | MEIS1  | PPARG    | SLC34A2 | TTN     |
| CA7      | EGF     | HOXB7   | MELK   | PPARGC1A | SLC35A1 | TYRO3   |
| CACNA1C  | EGFR    | HOXB8   | MEN1   | PPM1D    | SLC35A2 | UHRF1   |
| CACNA2D1 | EIF6    | HOXC4   | MEP1A  | PRKACA   | SLC35A3 | ULK1    |
| CACNB2   | ELF3    | HOXC6   | MET    | PRKACB   | SLC35B3 | VDR     |
| CACNB4   | ELP3    | HOXC8   | MFSD2A | PRKAR1A  | SLC35D1 | VIL1    |
| CAMK1D   | ENC1    | HOXD1   | MGAT3  | PRKAR1B  | SLC37A4 | VIM     |
| CAMK2B   | EP400   | HOXD10  | MGST1  | PRKCA    | SLC38A1 | VNN1    |
| CAMK2D   | EPAS1   | HOXD13  | MLH1   | PRKCB    | SLC38A2 | WLS     |
| CASK     | EPHB1   | HOXD8   | MLLT4  | PRKCD    | SLC39A4 | WNT2B   |
| CASP1    | EPHB4   | HPGD    | MMP1   | PRKCE    | SLC39A5 | WNT3    |
| CASP3    | EPHB6   | HRAS    | MMP9   | PRKCH    | SLC39A7 | WNT4    |
| CASP4    | ERBB2   | HRH1    | MPC1   | PRKCI    | SLC39A8 | WNT5A   |
| CAT      | ERBB4   | HSD17B2 | MPC2   | PRKDC    | SLC39A9 | WNT7A   |
| CAV1     | ESR1    | HSPA1A  | MSH2   | PRNP     | SLC3A1  | XIST    |
| CBX5     | F11R    | HSPA1B  | MSH3   | PROM1    | SLC3A2  | XRCC6   |
| CCDC80   | FABP1   | HSPD1   | MSH6   | PROM2    | SLC40A1 | YAP1    |
| CCL15    | FABP2   | ICAM1   | MSI1   | PROX1    | SLC43A2 | YWHAB   |
| CCL28    | FABP3   | ICK     | MSI2   | PRSS23   | SLC44A1 | YWHAE   |
| CCND1    | FABP6   | ID1     | MUC1   | PSME2    | SLC44A3 | YWHAG   |
| CD24     | FAM129A | ID2     | MUC17  | PTAFR    | SLC4A4  | YWHAH   |
| CD36     | FAS     | ID3     | MUC19  | PTBP1    | SLC4A7  | YWHAQ   |
| CD44     | FASLG   | ID4     | MUC2   | PTCH1    | SLC50A1 | YWHAZ   |
| CD59     | FASN    | IER3    | MUC3A  | PTEN     | SLC51A  | YY1     |
| CD74     | FDFT1   | IFITM2  | MUC4   | PTGER4   | SLC51B  | ZBTB33  |
| CD9      | FFAR2   | IFNAR1  | MXI1   | PTGES    | SLC5A1  | ZDHHC20 |
| CDC25B   | FFAR4   | IGF1    | MYB    | PTGFRN   | SLC5A11 | ZEB2    |
| CDC42    | FGF18   | IGF1R   | MYC    | PTGIR    | SLC5A12 | ZNF365  |

**Table S3. High-ENL DE Genes.** Differentially expressed (DE) genes in the contrast flaxseed lignan supplement vs placebo treatment in high-ENL excretors, sorted by their respective FDR.

Abbreviations: logFC, log fold change; logCPM, log counts per million; LR, likelihood ratio; FDR, False Discovery Rate corrected p-values; FC, fold change.

\*Genes that also appear as DE in the Low ENL participants with the same directionality (upregulation/downregulation).

|               | logFC   | logCPM  | LR      | P-Value  | FDR      | FC      |
|---------------|---------|---------|---------|----------|----------|---------|
| ARMCX4        | 6.0477  | 1.5671  | 26.7692 | 2.29E-07 | 2.65E-03 | 66.1533 |
| AIM1          | -4.5554 | 3.5694  | 24.6864 | 6.75E-07 | 3.11E-03 | 0.0425  |
| CREB3L1       | -3.6000 | 8.5348  | 24.3374 | 8.09E-07 | 3.11E-03 | 0.0825  |
| POU2AF1       | 4.6753  | 1.0426  | 23.1157 | 1.53E-06 | 4.41E-03 | 25.5512 |
| RP11-370I10.2 | 4.7831  | 1.0020  | 22.5790 | 2.02E-06 | 4.66E-03 | 27.5326 |
| SAMD15*       | 5.0488  | 1.1090  | 21.8922 | 2.88E-06 | 5.56E-03 | 33.1012 |
| FAM83H        | -6.7172 | 2.5243  | 20.6628 | 5.48E-06 | 9.04E-03 | 0.0095  |
| GRHL2         | -4.6545 | 4.2347  | 19.8287 | 8.47E-06 | 1.22E-02 | 0.0397  |
| PRDX6         | -2.8653 | 10.2168 | 19.1092 | 1.23E-05 | 1.40E-02 | 0.1372  |
| ZAK           | -6.1162 | 3.1571  | 19.0036 | 1.30E-05 | 1.40E-02 | 0.0144  |
| RALA          | -4.2525 | 6.4419  | 18.9572 | 1.34E-05 | 1.40E-02 | 0.0525  |
| CACNG8*       | 5.2391  | 1.6536  | 18.5980 | 1.61E-05 | 1.50E-02 | 37.7674 |
| GTF2F1        | -5.5037 | 2.3855  | 18.4073 | 1.78E-05 | 1.50E-02 | 0.0220  |
| GEN1*         | 4.6283  | 1.1685  | 18.3763 | 1.81E-05 | 1.50E-02 | 24.7321 |
| HPS1          | -3.7463 | 7.2443  | 18.2116 | 1.98E-05 | 1.52E-02 | 0.0745  |
| MEIS1-AS2     | 4.1466  | 0.8861  | 17.8528 | 2.39E-05 | 1.68E-02 | 17.7113 |
| TMEM38B       | -4.4023 | 4.1493  | 17.7863 | 2.47E-05 | 1.68E-02 | 0.0473  |
| GLRX5         | -3.3949 | 3.9272  | 17.6521 | 2.65E-05 | 1.70E-02 | 0.0951  |
| IFNGR2        | -3.0034 | 9.8143  | 17.5277 | 2.83E-05 | 1.72E-02 | 0.1247  |
| SNX5          | -3.5364 | 4.3347  | 17.1200 | 3.51E-05 | 1.90E-02 | 0.0862  |
| UBE2N         | -3.3893 | 6.2470  | 17.0291 | 3.68E-05 | 1.90E-02 | 0.0954  |
| SAA1          | 3.6714  | 0.6673  | 16.9472 | 3.84E-05 | 1.90E-02 | 12.7413 |
| TRPS1         | 5.6531  | 4.7965  | 16.8152 | 4.12E-05 | 1.90E-02 | 50.3200 |
| HIGD1A        | -2.4801 | 9.0244  | 16.8112 | 4.13E-05 | 1.90E-02 | 0.1792  |
| KIF20B*       | 4.1406  | 1.0094  | 16.7600 | 4.24E-05 | 1.90E-02 | 17.6378 |
| TRAPPC12      | 4.6587  | 1.1248  | 16.6830 | 4.42E-05 | 1.90E-02 | 25.2589 |
| ADD3          | -3.7702 | 4.3604  | 16.6034 | 4.61E-05 | 1.90E-02 | 0.0733  |
| TDG           | -4.8059 | 3.8774  | 16.4593 | 4.97E-05 | 1.90E-02 | 0.0358  |
| F11R          | -2.5455 | 6.9395  | 16.4493 | 5.00E-05 | 1.90E-02 | 0.1713  |
| SH3BGR        | 4.3756  | 0.8932  | 16.3248 | 5.34E-05 | 1.90E-02 | 20.7574 |
| CCDC146       | 5.9065  | 1.6622  | 16.3091 | 5.38E-05 | 1.90E-02 | 59.9846 |
| GHDC          | 3.4554  | 0.7468  | 16.3091 | 5.38E-05 | 1.90E-02 | 10.9692 |
| ADIPOR2*      | -2.7360 | 8.3881  | 16.2334 | 5.60E-05 | 1.90E-02 | 0.1501  |
| TIMMDC1       | -4.2061 | 3.5221  | 16.2168 | 5.65E-05 | 1.90E-02 | 0.0542  |
| MIR222HG      | 4.8809  | 1.3071  | 16.1780 | 5.77E-05 | 1.90E-02 | 29.4648 |
| PPP3CA        | 2.8325  | 6.9668  | 16.0084 | 6.31E-05 | 1.94E-02 | 7.1231  |
| NOTCH3        | 3.8016  | 0.8174  | 15.9985 | 6.34E-05 | 1.94E-02 | 13.9444 |
| GREB1L        | 4.3685  | 0.9699  | 15.9837 | 6.39E-05 | 1.94E-02 | 20.6564 |
| YBX1          | -3.1446 | 5.3421  | 15.8028 | 7.03E-05 | 1.99E-02 | 0.1131  |
| LRRN2         | 4.8952  | 1.3362  | 15.7788 | 7.12E-05 | 1.99E-02 | 29.7572 |
| MYH10*        | 4.1373  | 1.1666  | 15.7514 | 7.22E-05 | 1.99E-02 | 17.5971 |

|               |         |        |         |          |          |         |
|---------------|---------|--------|---------|----------|----------|---------|
| GRIN2B*       | 4.6850  | 1.6430 | 15.7038 | 7.41E-05 | 1.99E-02 | 25.7237 |
| RHOB          | -2.7067 | 8.9046 | 15.7019 | 7.42E-05 | 1.99E-02 | 0.1532  |
| TNFRSF21      | -2.7893 | 6.5795 | 15.6572 | 7.59E-05 | 1.99E-02 | 0.1447  |
| XPO4          | 3.6871  | 1.1784 | 15.4803 | 8.34E-05 | 2.14E-02 | 12.8804 |
| SRPK2         | 4.1132  | 3.0635 | 15.2794 | 9.27E-05 | 2.30E-02 | 17.3062 |
| ATP10B        | 3.5229  | 5.3105 | 15.2310 | 9.51E-05 | 2.30E-02 | 11.4944 |
| ARPC5         | 2.2167  | 8.1810 | 15.2266 | 9.54E-05 | 2.30E-02 | 4.6482  |
| ANO5          | 3.9639  | 1.9658 | 15.1595 | 9.88E-05 | 2.32E-02 | 15.6046 |
| COA5          | -6.1043 | 2.2570 | 15.1328 | 1.00E-04 | 2.32E-02 | 0.0145  |
| PTPRC*        | 3.0748  | 5.5875 | 15.0171 | 1.07E-04 | 2.40E-02 | 8.4256  |
| ELF1          | -2.3973 | 3.4464 | 14.9943 | 1.08E-04 | 2.40E-02 | 0.1898  |
| RNF103        | -2.7475 | 6.8063 | 14.8480 | 1.17E-04 | 2.46E-02 | 0.1489  |
| RGP1          | 4.1201  | 1.4286 | 14.8346 | 1.17E-04 | 2.46E-02 | 17.3885 |
| PLEK2         | -5.0679 | 3.4114 | 14.7930 | 1.20E-04 | 2.46E-02 | 0.0298  |
| KTN1          | 2.2703  | 6.9790 | 14.7801 | 1.21E-04 | 2.46E-02 | 4.8243  |
| TRBVA         | 5.6996  | 1.2832 | 14.7735 | 1.21E-04 | 2.46E-02 | 51.9693 |
| PPP1R13L      | -4.4569 | 1.5330 | 14.6131 | 1.32E-04 | 2.61E-02 | 0.0455  |
| MFI2          | 3.3110  | 1.7605 | 14.5965 | 1.33E-04 | 2.61E-02 | 9.9247  |
| SPIN1         | -3.1876 | 4.5931 | 14.4705 | 1.42E-04 | 2.71E-02 | 0.1098  |
| TMEM56*       | -2.4639 | 6.6609 | 14.4629 | 1.43E-04 | 2.71E-02 | 0.1813  |
| BBOX1         | 3.6382  | 1.3675 | 14.3274 | 1.54E-04 | 2.84E-02 | 12.4510 |
| COX7A2        | -2.2539 | 6.9775 | 14.2837 | 1.57E-04 | 2.84E-02 | 0.2097  |
| EPN2          | 3.3850  | 1.1459 | 14.2783 | 1.58E-04 | 2.84E-02 | 10.4472 |
| TFAP2D        | 4.8542  | 2.4525 | 14.2529 | 1.60E-04 | 2.84E-02 | 28.9247 |
| ARHGAP21      | -3.2726 | 4.5048 | 14.2102 | 1.63E-04 | 2.86E-02 | 0.1035  |
| AC079612.2*   | 4.3148  | 1.7490 | 14.0947 | 1.74E-04 | 3.00E-02 | 19.9018 |
| SRRD          | 4.0932  | 0.9203 | 14.0144 | 1.81E-04 | 3.04E-02 | 17.0676 |
| EIF1AD        | -4.3271 | 5.6577 | 13.9839 | 1.84E-04 | 3.04E-02 | 0.0498  |
| DPP4          | -3.6145 | 3.5270 | 13.9833 | 1.84E-04 | 3.04E-02 | 0.0816  |
| PRELID2       | -3.0099 | 8.2757 | 13.9589 | 1.87E-04 | 3.04E-02 | 0.1241  |
| RARRES1       | -4.6457 | 2.6933 | 13.9158 | 1.91E-04 | 3.07E-02 | 0.0399  |
| PIGV          | 5.1255  | 1.3413 | 13.8693 | 1.96E-04 | 3.07E-02 | 34.9085 |
| WAC           | -2.9209 | 6.5527 | 13.7991 | 2.03E-04 | 3.07E-02 | 0.1320  |
| CEP72         | 4.4509  | 0.8110 | 13.7767 | 2.06E-04 | 3.07E-02 | 21.8708 |
| NUDT4         | -2.1448 | 8.7856 | 13.7650 | 2.07E-04 | 3.07E-02 | 0.2261  |
| NDUFA5        | -3.1834 | 5.7380 | 13.7348 | 2.11E-04 | 3.07E-02 | 0.1101  |
| CLN5          | 4.0922  | 0.9086 | 13.7325 | 2.11E-04 | 3.07E-02 | 17.0562 |
| SH3D19        | -2.8230 | 6.5792 | 13.6991 | 2.15E-04 | 3.07E-02 | 0.1413  |
| ACAP3*        | 3.8667  | 1.3390 | 13.6768 | 2.17E-04 | 3.07E-02 | 14.5876 |
| NPM1P4        | 4.0017  | 1.2595 | 13.6712 | 2.18E-04 | 3.07E-02 | 16.0190 |
| C11orf49      | 4.2268  | 1.4874 | 13.6704 | 2.18E-04 | 3.07E-02 | 18.7239 |
| RP11-445O3.3* | 4.0930  | 1.0503 | 13.6379 | 2.22E-04 | 3.07E-02 | 17.0659 |
| RP11-565F19.2 | 3.4096  | 0.6265 | 13.6247 | 2.23E-04 | 3.07E-02 | 10.6268 |
| AARS          | 4.2334  | 1.5132 | 13.4935 | 2.39E-04 | 3.25E-02 | 18.8099 |
| XKR4*         | 5.2123  | 2.7999 | 13.4722 | 2.42E-04 | 3.25E-02 | 37.0736 |
| IGFBP5        | 3.7572  | 1.4216 | 13.3858 | 2.54E-04 | 3.37E-02 | 13.5214 |
| RP11-888D10.4 | 5.3603  | 1.3633 | 13.3130 | 2.64E-04 | 3.46E-02 | 41.0790 |

|               |         |        |         |          |          |         |
|---------------|---------|--------|---------|----------|----------|---------|
| UQCRB         | -2.9087 | 6.1866 | 13.2723 | 2.69E-04 | 3.50E-02 | 0.1332  |
| KNTC1         | 3.9931  | 1.0764 | 13.1637 | 2.85E-04 | 3.65E-02 | 15.9236 |
| GLE1          | -6.4319 | 4.6756 | 13.1533 | 2.87E-04 | 3.65E-02 | 0.0116  |
| TRIM6         | -5.0518 | 2.8793 | 13.0692 | 3.00E-04 | 3.77E-02 | 0.0301  |
| KIAA1841*     | 3.7393  | 2.3484 | 13.0516 | 3.03E-04 | 3.77E-02 | 13.3547 |
| TMEM161B      | 2.8030  | 4.1961 | 12.9420 | 3.21E-04 | 3.92E-02 | 6.9790  |
| ZBED1         | 3.7469  | 3.7916 | 12.9374 | 3.22E-04 | 3.92E-02 | 13.4254 |
| CHRM2         | 5.3480  | 1.8069 | 12.8546 | 3.37E-04 | 4.02E-02 | 40.7288 |
| RP11-102M11.2 | 2.8825  | 0.6955 | 12.8431 | 3.39E-04 | 4.02E-02 | 7.3744  |
| FCRL5         | 3.3146  | 0.6318 | 12.8312 | 3.41E-04 | 4.02E-02 | 9.9494  |
| AC005537.2    | 3.4779  | 1.0791 | 12.7502 | 3.56E-04 | 4.16E-02 | 11.1419 |
| PLEKHM1       | 3.7830  | 1.7056 | 12.7013 | 3.65E-04 | 4.20E-02 | 13.7658 |
| NPM1P25       | 3.4037  | 0.6602 | 12.6817 | 3.69E-04 | 4.20E-02 | 10.5835 |
| EID2B         | 4.1059  | 0.8719 | 12.6604 | 3.73E-04 | 4.20E-02 | 17.2190 |
| CHP2          | -3.3183 | 4.5616 | 12.6451 | 3.77E-04 | 4.20E-02 | 0.1003  |
| PI4KA*        | 3.6989  | 1.0550 | 12.6272 | 3.80E-04 | 4.20E-02 | 12.9857 |
| RP11-401P9.6  | 3.2522  | 0.6668 | 12.6134 | 3.83E-04 | 4.20E-02 | 9.5281  |
| CD63          | -2.1695 | 5.9462 | 12.5855 | 3.89E-04 | 4.20E-02 | 0.2223  |
| SMS           | -2.5002 | 8.8068 | 12.5709 | 3.92E-04 | 4.20E-02 | 0.1767  |
| ZSWIM4        | 3.1488  | 6.5142 | 12.5586 | 3.94E-04 | 4.20E-02 | 8.8690  |
| MRPL19        | 4.7913  | 3.0346 | 12.5510 | 3.96E-04 | 4.20E-02 | 27.6894 |
| MTM1          | -3.2429 | 3.9469 | 12.5174 | 4.03E-04 | 4.21E-02 | 0.1056  |
| SETDB1        | 2.9549  | 0.7734 | 12.5137 | 4.04E-04 | 4.21E-02 | 7.7537  |
| SRSF5         | -3.0444 | 4.3771 | 12.4901 | 4.09E-04 | 4.21E-02 | 0.1212  |
| NRCAM         | 3.7825  | 0.8471 | 12.4782 | 4.12E-04 | 4.21E-02 | 13.7608 |
| FOXO3*        | -2.6267 | 5.2326 | 12.4222 | 4.24E-04 | 4.30E-02 | 0.1619  |
| POFUT2        | 2.9274  | 2.0494 | 12.3906 | 4.31E-04 | 4.34E-02 | 7.6076  |
| CYP4B1        | 3.6301  | 1.1122 | 12.3642 | 4.38E-04 | 4.35E-02 | 12.3812 |
| LAPTM4A       | -2.7660 | 9.0607 | 12.3511 | 4.41E-04 | 4.35E-02 | 0.1470  |
| CNOT2         | -2.6600 | 5.2919 | 12.3194 | 4.48E-04 | 4.37E-02 | 0.1582  |
| HECA          | -2.7256 | 5.8736 | 12.2840 | 4.57E-04 | 4.37E-02 | 0.1512  |
| POP5          | 4.0020  | 0.9919 | 12.2809 | 4.58E-04 | 4.37E-02 | 16.0218 |
| KIAA0101*     | 3.3443  | 0.8733 | 12.2796 | 4.58E-04 | 4.37E-02 | 10.1560 |
| PARL          | -4.7270 | 4.3755 | 12.2204 | 4.73E-04 | 4.46E-02 | 0.0378  |
| MIR1199       | -5.2697 | 1.6221 | 12.2124 | 4.75E-04 | 4.46E-02 | 0.0259  |
| MGAT4C*       | 4.2534  | 2.5802 | 12.1893 | 4.81E-04 | 4.48E-02 | 19.0716 |
| SPTLC3*       | 3.1610  | 0.7713 | 12.1468 | 4.92E-04 | 4.49E-02 | 8.9446  |
| DNAJC27*      | 4.7018  | 1.3558 | 12.1254 | 4.97E-04 | 4.49E-02 | 26.0237 |
| UBXN1         | -3.0643 | 2.4417 | 12.1112 | 5.01E-04 | 4.49E-02 | 0.1195  |
| ERCC4         | 3.6967  | 2.0354 | 12.0922 | 5.06E-04 | 4.49E-02 | 12.9664 |
| PRPSAP2       | 2.8534  | 2.2422 | 12.0703 | 5.12E-04 | 4.49E-02 | 7.2272  |
| HDGFRP2       | 2.9052  | 2.6531 | 12.0549 | 5.17E-04 | 4.49E-02 | 7.4913  |
| DCAF8         | -3.0948 | 3.0608 | 12.0298 | 5.24E-04 | 4.49E-02 | 0.1171  |
| RHOH          | 3.5446  | 2.0210 | 12.0297 | 5.24E-04 | 4.49E-02 | 11.6688 |
| MTHFSD        | -4.8003 | 1.0764 | 12.0289 | 5.24E-04 | 4.49E-02 | 0.0359  |
| PRKAA1        | -2.8988 | 5.0167 | 12.0220 | 5.26E-04 | 4.49E-02 | 0.1341  |
| PROX1*        | 3.8586  | 2.3350 | 12.0118 | 5.29E-04 | 4.49E-02 | 14.5059 |

|             |         |         |         |          |          |         |
|-------------|---------|---------|---------|----------|----------|---------|
| CTBP1       | -2.8818 | 6.1859  | 12.0065 | 5.30E-04 | 4.49E-02 | 0.1357  |
| ADORA2A-AS1 | 3.5729  | 0.8930  | 11.9990 | 5.32E-04 | 4.49E-02 | 11.9002 |
| GSTO1       | 3.9892  | 1.6372  | 11.9646 | 5.42E-04 | 4.54E-02 | 15.8803 |
| PPP1R2      | -2.4834 | 3.6082  | 11.8712 | 5.70E-04 | 4.74E-02 | 0.1788  |
| CATSPER2    | 4.4765  | 1.1054  | 11.8579 | 5.74E-04 | 4.74E-02 | 22.2626 |
| TMEM132B*   | 4.0982  | 1.1740  | 11.8383 | 5.80E-04 | 4.76E-02 | 17.1274 |
| SIAH3*      | 4.3062  | 0.9506  | 11.8034 | 5.91E-04 | 4.76E-02 | 19.7832 |
| GDI2        | -2.9317 | 7.3302  | 11.7850 | 5.97E-04 | 4.76E-02 | 0.1311  |
| PPP1CB      | -1.9915 | 11.0357 | 11.7796 | 5.99E-04 | 4.76E-02 | 0.2515  |
| TXNRD1*     | -2.2916 | 8.0706  | 11.7731 | 6.01E-04 | 4.76E-02 | 0.2043  |
| PGS1        | 4.2567  | 1.1014  | 11.7713 | 6.02E-04 | 4.76E-02 | 19.1152 |
| TRIM4       | -4.5637 | 3.9131  | 11.7326 | 6.14E-04 | 4.80E-02 | 0.0423  |
| GGPS1       | -3.0995 | 5.6808  | 11.7299 | 6.15E-04 | 4.80E-02 | 0.1167  |
| ZNF100      | 3.5210  | 1.0097  | 11.7120 | 6.21E-04 | 4.82E-02 | 11.4792 |
| OSGIN1      | 5.1939  | 1.4185  | 11.6831 | 6.31E-04 | 4.86E-02 | 36.6034 |
| KSR1        | 3.8470  | 0.9505  | 11.6705 | 6.35E-04 | 4.86E-02 | 14.3896 |
| GLDN        | -4.3722 | 1.0384  | 11.6103 | 6.56E-04 | 4.88E-02 | 0.0483  |
| FAM222B*    | -2.3316 | 6.7209  | 11.6062 | 6.57E-04 | 4.88E-02 | 0.1987  |
| TMEM108     | 3.9425  | 1.1107  | 11.5889 | 6.63E-04 | 4.88E-02 | 15.3746 |
| RAB18       | -2.3045 | 5.6872  | 11.5802 | 6.67E-04 | 4.88E-02 | 0.2024  |
| FAM133A*    | 3.0895  | 1.7707  | 11.5714 | 6.70E-04 | 4.88E-02 | 8.5119  |
| ATP6V0E1    | -1.8627 | 7.5789  | 11.5556 | 6.75E-04 | 4.88E-02 | 0.2750  |
| FAM212B     | 3.7414  | 1.1405  | 11.5533 | 6.76E-04 | 4.88E-02 | 13.3748 |
| RPGR*       | 4.5634  | 3.0035  | 11.5454 | 6.79E-04 | 4.88E-02 | 23.6435 |
| TMEM167B    | -2.9407 | 3.6647  | 11.5341 | 6.83E-04 | 4.88E-02 | 0.1302  |
| RHOBTB1     | -4.4411 | 3.3948  | 11.5284 | 6.85E-04 | 4.88E-02 | 0.0460  |
| MPHOSPH9    | 4.7324  | 1.3601  | 11.5220 | 6.88E-04 | 4.88E-02 | 26.5831 |
| FRAS1       | 3.5866  | 0.8666  | 11.5111 | 6.92E-04 | 4.88E-02 | 12.0138 |
| SGOL2       | 5.8117  | 1.2415  | 11.5021 | 6.95E-04 | 4.88E-02 | 56.1695 |
| AC114498.1  | 2.7350  | 1.6236  | 11.4972 | 6.97E-04 | 4.88E-02 | 6.6574  |



**Table S4. Low-ENL DE Genes.** Differentially expressed (DE) genes in the contrast flaxseed lignan supplement vs placebo treatment in low-ENL excreters, sorted by their respective FDR.

Abbreviations: logFC, log fold change; logCPM, log counts per million; LR, likelihood ratio; FDR, False Discovery Rate corrected p-values; FC, fold change.

\*Genes that also appear as DE in the high ENL participants with the same directionality (upregulation/downregulation).

|               | logFC   | logCPM | LR      | p-Value  | FDR      | FC       |
|---------------|---------|--------|---------|----------|----------|----------|
| OTOP2         | -5.2307 | 4.4961 | 37.4709 | 9.28E-10 | 1.07E-05 | 0.0266   |
| RP11-217O12.1 | 5.8100  | 2.1304 | 30.5429 | 3.27E-08 | 1.89E-04 | 56.1032  |
| SIRT5         | 2.8775  | 0.8518 | 26.5376 | 2.58E-07 | 8.60E-04 | 7.3486   |
| CHMP4C        | 4.2710  | 3.2839 | 26.0712 | 3.29E-07 | 8.60E-04 | 19.3057  |
| HERC6         | 3.6319  | 0.9521 | 25.7585 | 3.87E-07 | 8.60E-04 | 12.3970  |
| PTCHD1        | 5.6572  | 1.6304 | 25.4816 | 4.47E-07 | 8.60E-04 | 50.4629  |
| CD93          | 3.5470  | 0.8208 | 25.0248 | 5.66E-07 | 9.34E-04 | 11.6882  |
| ACADSB        | -4.5375 | 1.0660 | 24.1622 | 8.86E-07 | 1.28E-03 | 0.0431   |
| UBR1          | 5.5486  | 1.5936 | 23.7907 | 1.07E-06 | 1.36E-03 | 46.8054  |
| ANKLE1        | 3.5713  | 0.9636 | 23.6083 | 1.18E-06 | 1.36E-03 | 11.8870  |
| STPG1         | 5.3562  | 1.5952 | 23.3188 | 1.37E-06 | 1.44E-03 | 40.9611  |
| GPC2          | 3.8837  | 1.2120 | 22.9002 | 1.71E-06 | 1.49E-03 | 14.7610  |
| SKI           | -3.9048 | 4.7478 | 22.7352 | 1.86E-06 | 1.49E-03 | 0.0668   |
| FKBP5         | -5.5872 | 3.9782 | 22.6707 | 1.92E-06 | 1.49E-03 | 0.0208   |
| OTX2-AS1      | 5.5594  | 1.5793 | 22.5448 | 2.05E-06 | 1.49E-03 | 47.1576  |
| CIITA         | 4.5324  | 1.1617 | 22.5417 | 2.06E-06 | 1.49E-03 | 23.1408  |
| NPTX1         | 5.1805  | 1.2975 | 22.3883 | 2.23E-06 | 1.49E-03 | 36.2641  |
| RP11-6N17.4   | 4.6828  | 2.3832 | 22.2549 | 2.39E-06 | 1.49E-03 | 25.6833  |
| COL1A2        | 6.6847  | 2.1134 | 22.2009 | 2.46E-06 | 1.49E-03 | 102.8732 |
| RBP4          | -3.3714 | 0.8125 | 21.9789 | 2.76E-06 | 1.52E-03 | 0.0966   |
| LDOC1L        | -4.5939 | 1.3650 | 21.9646 | 2.78E-06 | 1.52E-03 | 0.0414   |
| SAE1          | 4.3707  | 1.0658 | 21.8554 | 2.94E-06 | 1.52E-03 | 20.6877  |
| SRP68         | -3.6917 | 1.0332 | 21.7950 | 3.03E-06 | 1.52E-03 | 0.0774   |
| FEZ1          | 3.4321  | 0.8161 | 21.6475 | 3.28E-06 | 1.56E-03 | 10.7939  |
| RUNX1T1       | 5.7551  | 2.2500 | 21.4876 | 3.56E-06 | 1.56E-03 | 54.0071  |
| RP11-583F2.2  | 4.3462  | 1.0840 | 21.4846 | 3.57E-06 | 1.56E-03 | 20.3391  |
| TPD52L1       | 3.0407  | 0.7469 | 21.3875 | 3.75E-06 | 1.56E-03 | 8.2287   |
| FEM1A         | 4.2457  | 1.4310 | 21.3359 | 3.85E-06 | 1.56E-03 | 18.9709  |
| PECAM1        | 4.0708  | 1.0050 | 21.3016 | 3.92E-06 | 1.56E-03 | 16.8051  |
| LINC00560     | 4.0314  | 1.2525 | 21.1457 | 4.26E-06 | 1.64E-03 | 16.3522  |
| CCDC117       | -3.8419 | 5.1205 | 20.8759 | 4.90E-06 | 1.83E-03 | 0.0697   |
| TMEM132B*     | 4.6368  | 1.1740 | 20.7844 | 5.14E-06 | 1.86E-03 | 24.8786  |
| RP5-1198O20.4 | 4.7441  | 1.3064 | 20.7049 | 5.36E-06 | 1.88E-03 | 26.7983  |
| MUC19         | 5.4532  | 1.5954 | 20.6082 | 5.64E-06 | 1.88E-03 | 43.8114  |
| RP4-569M23.5  | 4.5351  | 0.9439 | 20.5849 | 5.70E-06 | 1.88E-03 | 23.1839  |

|              |         |        |         |          |          |          |
|--------------|---------|--------|---------|----------|----------|----------|
| SLC38A7      | 5.3221  | 1.4334 | 20.4908 | 5.99E-06 | 1.88E-03 | 40.0039  |
| ZNF613       | 2.9859  | 0.8087 | 20.4815 | 6.02E-06 | 1.88E-03 | 7.9224   |
| PIM2         | -5.5573 | 4.5733 | 20.3873 | 6.32E-06 | 1.92E-03 | 0.0212   |
| SLC16A10     | 4.1722  | 1.0532 | 20.1914 | 7.01E-06 | 2.08E-03 | 18.0285  |
| RPL32P3      | 3.1068  | 0.9208 | 20.1419 | 7.19E-06 | 2.08E-03 | 8.6146   |
| ATG2A        | -3.5956 | 3.8326 | 20.0691 | 7.47E-06 | 2.11E-03 | 0.0827   |
| KLHL18       | -3.8090 | 1.3592 | 19.7180 | 8.97E-06 | 2.45E-03 | 0.0713   |
| TNPO3        | -4.7615 | 3.3196 | 19.6922 | 9.10E-06 | 2.45E-03 | 0.0369   |
| CACNG2       | 4.2627  | 1.3020 | 19.4472 | 1.03E-05 | 2.72E-03 | 19.1950  |
| RNF14        | -4.2243 | 5.2797 | 19.3492 | 1.09E-05 | 2.80E-03 | 0.0535   |
| CTC-384G19.1 | 2.9732  | 0.7000 | 19.2101 | 1.17E-05 | 2.90E-03 | 7.8527   |
| GNAO1        | 5.3704  | 2.8183 | 19.1701 | 1.20E-05 | 2.90E-03 | 41.3675  |
| WDYHV1       | 4.4661  | 0.9322 | 19.1274 | 1.22E-05 | 2.90E-03 | 22.1019  |
| WFDC1        | 3.3747  | 0.7758 | 19.0835 | 1.25E-05 | 2.90E-03 | 10.3723  |
| PGBD4        | 3.5314  | 1.1288 | 19.0527 | 1.27E-05 | 2.90E-03 | 11.5628  |
| NCBP2-AS2    | -4.4936 | 1.2599 | 19.0398 | 1.28E-05 | 2.90E-03 | 0.0444   |
| C6orf222     | -3.7951 | 5.7969 | 18.9825 | 1.32E-05 | 2.93E-03 | 0.0720   |
| SCN8A        | 2.9110  | 0.6725 | 18.9307 | 1.36E-05 | 2.93E-03 | 7.5215   |
| AGO1         | -4.5822 | 5.8383 | 18.9095 | 1.37E-05 | 2.93E-03 | 0.0417   |
| OR2H1        | 6.2544  | 2.1540 | 18.8478 | 1.42E-05 | 2.93E-03 | 76.3430  |
| BAZ1B        | -3.3347 | 4.2225 | 18.8416 | 1.42E-05 | 2.93E-03 | 0.0991   |
| MEP1B        | -4.5641 | 1.5769 | 18.7942 | 1.46E-05 | 2.95E-03 | 0.0423   |
| IVD          | 3.9897  | 0.8282 | 18.7020 | 1.53E-05 | 3.05E-03 | 15.8859  |
| FAM222B*     | -3.0026 | 6.7209 | 18.6379 | 1.58E-05 | 3.08E-03 | 0.1248   |
| DLEU1        | 3.4114  | 0.8634 | 18.6178 | 1.60E-05 | 3.08E-03 | 10.6400  |
| JAKMIP1      | 4.4087  | 2.7634 | 18.5003 | 1.70E-05 | 3.08E-03 | 21.2395  |
| C11orf30     | 4.5329  | 1.7966 | 18.4685 | 1.73E-05 | 3.08E-03 | 23.1497  |
| DSCAM        | 3.7802  | 0.8846 | 18.4601 | 1.74E-05 | 3.08E-03 | 13.7390  |
| GREB1        | 4.3922  | 1.3018 | 18.4386 | 1.75E-05 | 3.08E-03 | 20.9987  |
| MALRD1       | 2.7590  | 0.7200 | 18.4350 | 1.76E-05 | 3.08E-03 | 6.7694   |
| RP11-157L3.4 | 4.8304  | 1.2296 | 18.4325 | 1.76E-05 | 3.08E-03 | 28.4500  |
| SLC1A2       | 3.5694  | 0.9411 | 18.3590 | 1.83E-05 | 3.16E-03 | 11.8712  |
| TENM4        | 3.7079  | 0.9708 | 18.1927 | 2.00E-05 | 3.35E-03 | 13.0674  |
| MKL2         | -4.4562 | 2.6087 | 18.1872 | 2.00E-05 | 3.35E-03 | 0.0456   |
| KYNU         | 3.9582  | 1.2881 | 18.0888 | 2.11E-05 | 3.48E-03 | 15.5426  |
| UTP23        | 6.9483  | 2.2594 | 18.0590 | 2.14E-05 | 3.49E-03 | 123.4957 |
| JAG1         | 5.2154  | 4.5756 | 17.9664 | 2.25E-05 | 3.49E-03 | 37.1533  |
| ZC3H8        | 3.0884  | 0.9502 | 17.9123 | 2.31E-05 | 3.49E-03 | 8.5055   |
| SDHA         | 3.5545  | 1.3209 | 17.9006 | 2.33E-05 | 3.49E-03 | 11.7490  |
| RP11-295K2.3 | 4.7979  | 1.3663 | 17.8927 | 2.34E-05 | 3.49E-03 | 27.8179  |
| PITPNC1      | 4.4124  | 1.4335 | 17.8846 | 2.35E-05 | 3.49E-03 | 21.2936  |

|                |         |        |         |          |          |         |
|----------------|---------|--------|---------|----------|----------|---------|
| IFI16          | 4.9818  | 3.9500 | 17.8655 | 2.37E-05 | 3.49E-03 | 31.5991 |
| AC109357.1     | 4.6067  | 1.2466 | 17.8534 | 2.39E-05 | 3.49E-03 | 24.3640 |
| SLC9A7         | 4.8620  | 1.3805 | 17.8516 | 2.39E-05 | 3.49E-03 | 29.0806 |
| CD300E         | 4.8984  | 1.9053 | 17.8056 | 2.45E-05 | 3.52E-03 | 29.8231 |
| ZNF346         | 2.8152  | 0.7430 | 17.7636 | 2.50E-05 | 3.52E-03 | 7.0384  |
| GNPDA2         | 3.9283  | 1.1722 | 17.7305 | 2.55E-05 | 3.52E-03 | 15.2240 |
| C11orf83       | -3.2704 | 1.3653 | 17.7277 | 2.55E-05 | 3.52E-03 | 0.1036  |
| DDX11          | 3.3008  | 0.8269 | 17.7055 | 2.58E-05 | 3.52E-03 | 9.8548  |
| NABP1          | 2.7255  | 5.8385 | 17.6958 | 2.59E-05 | 3.52E-03 | 6.6140  |
| ZNF567         | 4.3232  | 0.9272 | 17.6760 | 2.62E-05 | 3.52E-03 | 20.0174 |
| SORBS1         | -3.3324 | 4.1719 | 17.6353 | 2.68E-05 | 3.55E-03 | 0.0993  |
| KIAA1683       | 4.8291  | 1.0941 | 17.4476 | 2.95E-05 | 3.80E-03 | 28.4252 |
| PGBD2          | -3.9887 | 1.4205 | 17.4428 | 2.96E-05 | 3.80E-03 | 0.0630  |
| NAE1           | 3.6515  | 1.2432 | 17.4318 | 2.98E-05 | 3.80E-03 | 12.5662 |
| NMNAT2         | 4.0087  | 1.2252 | 17.3799 | 3.06E-05 | 3.80E-03 | 16.0964 |
| FAM19A2        | 4.9208  | 1.0683 | 17.3585 | 3.10E-05 | 3.80E-03 | 30.2900 |
| AC079776.3     | 3.9420  | 1.0386 | 17.3107 | 3.17E-05 | 3.80E-03 | 15.3698 |
| SEZ6L2         | 3.7386  | 1.3442 | 17.2783 | 3.23E-05 | 3.80E-03 | 13.3480 |
| CYB5D2         | -4.2619 | 0.9507 | 17.2503 | 3.28E-05 | 3.80E-03 | 0.0521  |
| MFN2           | -3.3498 | 4.6943 | 17.2472 | 3.28E-05 | 3.80E-03 | 0.0981  |
| ZNF318         | 4.7453  | 1.8838 | 17.2293 | 3.31E-05 | 3.80E-03 | 26.8208 |
| TMEM126A       | -6.0603 | 2.1213 | 17.2251 | 3.32E-05 | 3.80E-03 | 0.0150  |
| NUSAP1         | 4.2050  | 1.0206 | 17.2089 | 3.35E-05 | 3.80E-03 | 18.4424 |
| WIPF3          | 2.7859  | 0.9127 | 17.2046 | 3.36E-05 | 3.80E-03 | 6.8966  |
| IPO7           | 2.8896  | 5.6632 | 17.1982 | 3.37E-05 | 3.80E-03 | 7.4108  |
| INTU           | 5.7403  | 2.4303 | 17.1898 | 3.38E-05 | 3.80E-03 | 53.4558 |
| WNT4           | 3.4839  | 1.0804 | 17.1895 | 3.38E-05 | 3.80E-03 | 11.1883 |
| ELFN1          | 5.6731  | 2.0592 | 17.1704 | 3.42E-05 | 3.80E-03 | 51.0238 |
| MARCH4         | 3.9313  | 1.0179 | 17.0707 | 3.60E-05 | 3.89E-03 | 15.2556 |
| PPP1R18        | 4.6449  | 1.4936 | 17.0671 | 3.61E-05 | 3.89E-03 | 25.0186 |
| TSSC1          | 3.4818  | 0.7854 | 17.0669 | 3.61E-05 | 3.89E-03 | 11.1721 |
| CNKSR1         | 5.6834  | 3.1468 | 17.0520 | 3.64E-05 | 3.89E-03 | 51.3904 |
| FAM122C        | 3.1508  | 0.7761 | 16.9585 | 3.82E-05 | 4.03E-03 | 8.8815  |
| TMEM221        | 2.9622  | 0.6320 | 16.9507 | 3.84E-05 | 4.03E-03 | 7.7930  |
| ERGIC3         | -3.2348 | 4.9915 | 16.9272 | 3.88E-05 | 4.04E-03 | 0.1062  |
| ZNF793         | 5.9580  | 2.9863 | 16.8464 | 4.05E-05 | 4.11E-03 | 62.1658 |
| DPY19L4        | 3.3081  | 0.7569 | 16.8065 | 4.14E-05 | 4.11E-03 | 9.9043  |
| RAPGEF4        | 4.0070  | 1.6945 | 16.8049 | 4.14E-05 | 4.11E-03 | 16.0773 |
| ATP6V0A2       | -3.9884 | 3.7034 | 16.8026 | 4.15E-05 | 4.11E-03 | 0.0630  |
| C15orf57       | 5.3535  | 2.2870 | 16.7919 | 4.17E-05 | 4.11E-03 | 40.8856 |
| CTD-2349P21.11 | 5.2367  | 1.2636 | 16.7853 | 4.19E-05 | 4.11E-03 | 37.7046 |

|               |         |        |         |          |          |          |
|---------------|---------|--------|---------|----------|----------|----------|
| CDH12         | 2.6904  | 0.6918 | 16.7682 | 4.22E-05 | 4.11E-03 | 6.4550   |
| SLC22A9       | 4.0951  | 0.9546 | 16.7522 | 4.26E-05 | 4.11E-03 | 17.0905  |
| PLEKHA2       | 4.5989  | 3.0813 | 16.7432 | 4.28E-05 | 4.11E-03 | 24.2334  |
| MAS1          | 4.2563  | 1.0264 | 16.7323 | 4.30E-05 | 4.11E-03 | 19.1109  |
| SYCP1         | 3.6813  | 0.8403 | 16.6907 | 4.40E-05 | 4.14E-03 | 12.8283  |
| NUP93         | 2.8808  | 0.8203 | 16.6893 | 4.40E-05 | 4.14E-03 | 7.3653   |
| RP11-467L13.7 | 4.6345  | 5.1442 | 16.6708 | 4.45E-05 | 4.14E-03 | 24.8386  |
| KMT2C         | 2.4902  | 6.2329 | 16.6414 | 4.52E-05 | 4.17E-03 | 5.6184   |
| NFE2L3        | 2.8139  | 0.8079 | 16.5838 | 4.65E-05 | 4.24E-03 | 7.0318   |
| ONECUT3       | 5.7957  | 2.6667 | 16.5303 | 4.79E-05 | 4.24E-03 | 55.5496  |
| SNORA31       | 7.9558  | 3.1357 | 16.5119 | 4.83E-05 | 4.24E-03 | 248.2681 |
| LINC01183     | 4.4191  | 1.1829 | 16.5096 | 4.84E-05 | 4.24E-03 | 21.3930  |
| AP000704.5    | 3.1716  | 0.7337 | 16.5048 | 4.85E-05 | 4.24E-03 | 9.0103   |
| HDHD2         | 4.5795  | 1.0587 | 16.4990 | 4.87E-05 | 4.24E-03 | 23.9095  |
| RP11-296E23.2 | 4.4480  | 1.1127 | 16.4983 | 4.87E-05 | 4.24E-03 | 21.8257  |
| POLI          | 3.8140  | 0.8836 | 16.4956 | 4.88E-05 | 4.24E-03 | 14.0650  |
| RP4-724E16.2  | 3.8261  | 0.8053 | 16.4679 | 4.95E-05 | 4.27E-03 | 14.1833  |
| SHPRH         | 4.7023  | 1.4993 | 16.4057 | 5.11E-05 | 4.38E-03 | 26.0334  |
| AMER1         | 4.8636  | 1.4893 | 16.3774 | 5.19E-05 | 4.39E-03 | 29.1130  |
| CTB-43E15.3   | 3.4050  | 0.9928 | 16.3728 | 5.20E-05 | 4.39E-03 | 10.5927  |
| RP11-108M9.3  | 3.0283  | 0.6631 | 16.3330 | 5.31E-05 | 4.45E-03 | 8.1587   |
| MROH7         | 3.6736  | 1.1906 | 16.3092 | 5.38E-05 | 4.46E-03 | 12.7608  |
| RANBP17       | 3.6905  | 1.3885 | 16.2946 | 5.42E-05 | 4.46E-03 | 12.9107  |
| RP11-38O23.4  | 3.4731  | 2.4869 | 16.2868 | 5.44E-05 | 4.46E-03 | 11.1047  |
| RP11-445O3.3* | 3.5824  | 1.0503 | 16.2084 | 5.67E-05 | 4.62E-03 | 11.9790  |
| PMM1          | -5.0968 | 3.6061 | 16.1780 | 5.77E-05 | 4.62E-03 | 0.0292   |
| C1GALT1C1     | -4.1592 | 2.2484 | 16.1683 | 5.80E-05 | 4.62E-03 | 0.0560   |
| DDX6          | -2.0588 | 7.8222 | 16.1574 | 5.83E-05 | 4.62E-03 | 0.2400   |
| GDF11         | 4.0788  | 1.3202 | 16.1495 | 5.85E-05 | 4.62E-03 | 16.8988  |
| RYS2          | 4.4814  | 1.9034 | 16.1308 | 5.91E-05 | 4.62E-03 | 22.3379  |
| KIAA1257      | 4.5789  | 1.3540 | 16.1242 | 5.93E-05 | 4.62E-03 | 23.8991  |
| C9orf37       | 3.1362  | 0.7452 | 16.1149 | 5.96E-05 | 4.62E-03 | 8.7920   |
| TRADD         | -4.0502 | 1.0865 | 16.0967 | 6.02E-05 | 4.64E-03 | 0.0604   |
| SCRN1         | 3.9978  | 1.1242 | 16.0774 | 6.08E-05 | 4.64E-03 | 15.9754  |
| CTC-559E9.5   | 5.6768  | 1.7305 | 16.0686 | 6.11E-05 | 4.64E-03 | 51.1537  |
| DPYD          | 4.9155  | 1.6859 | 16.0533 | 6.16E-05 | 4.65E-03 | 30.1802  |
| MYBPC1        | 4.9776  | 1.5176 | 16.0390 | 6.21E-05 | 4.65E-03 | 31.5063  |
| CDH19         | 5.2503  | 2.1142 | 16.0305 | 6.23E-05 | 4.65E-03 | 38.0615  |
| MYH10*        | 3.2098  | 1.1666 | 16.0116 | 6.30E-05 | 4.66E-03 | 9.2523   |
| NRXN3         | 4.2113  | 1.7591 | 16.0007 | 6.33E-05 | 4.66E-03 | 18.5239  |
| ANAPC1        | 4.3394  | 1.0232 | 15.9616 | 6.46E-05 | 4.71E-03 | 20.2431  |

|               |         |        |         |          |          |         |
|---------------|---------|--------|---------|----------|----------|---------|
| GGT7          | 3.3052  | 0.9598 | 15.9560 | 6.48E-05 | 4.71E-03 | 9.8846  |
| SIGLEC14      | -5.3312 | 3.2337 | 15.9185 | 6.61E-05 | 4.72E-03 | 0.0248  |
| ZC4H2         | 5.5087  | 1.4414 | 15.9174 | 6.62E-05 | 4.72E-03 | 45.5280 |
| C10orf67      | 3.4498  | 1.2413 | 15.9065 | 6.65E-05 | 4.72E-03 | 10.9271 |
| PIEZO2        | 4.5461  | 1.1888 | 15.9043 | 6.66E-05 | 4.72E-03 | 23.3614 |
| RNF24         | 3.7829  | 2.6269 | 15.8710 | 6.78E-05 | 4.78E-03 | 13.7651 |
| NAIP          | 3.6749  | 0.9062 | 15.8223 | 6.96E-05 | 4.87E-03 | 12.7718 |
| CACNG3        | 3.6993  | 1.0513 | 15.7731 | 7.14E-05 | 4.97E-03 | 12.9899 |
| TGM2          | 2.9674  | 0.8378 | 15.7231 | 7.33E-05 | 5.04E-03 | 7.8210  |
| SCGB2B2       | 3.5186  | 1.1293 | 15.7163 | 7.36E-05 | 5.04E-03 | 11.4603 |
| PHF14         | 5.0628  | 2.0490 | 15.7008 | 7.42E-05 | 5.04E-03 | 33.4248 |
| KLF12         | 2.9654  | 0.7244 | 15.6898 | 7.46E-05 | 5.04E-03 | 7.8102  |
| RP11-179A10.2 | 3.3421  | 0.6653 | 15.6893 | 7.46E-05 | 5.04E-03 | 10.1409 |
| ARHGAP10      | 4.6480  | 1.0998 | 15.6450 | 7.64E-05 | 5.13E-03 | 25.0727 |
| MTCO3P1       | -7.3367 | 2.3695 | 15.6257 | 7.72E-05 | 5.14E-03 | 0.0062  |
| NUP210        | 3.9965  | 0.9950 | 15.6165 | 7.76E-05 | 5.14E-03 | 15.9617 |
| CACNA2D1      | 4.3309  | 1.0147 | 15.6109 | 7.78E-05 | 5.14E-03 | 20.1247 |
| KIF20B*       | 3.0504  | 1.0094 | 15.5998 | 7.83E-05 | 5.14E-03 | 8.2842  |
| COL28A1       | 3.1459  | 0.6928 | 15.5572 | 8.00E-05 | 5.17E-03 | 8.8515  |
| FERMT2        | 3.0857  | 0.6912 | 15.5434 | 8.06E-05 | 5.17E-03 | 8.4898  |
| PTPRS         | 3.6249  | 1.8201 | 15.5411 | 8.07E-05 | 5.17E-03 | 12.3367 |
| NEB           | 2.9854  | 1.0972 | 15.5344 | 8.10E-05 | 5.17E-03 | 7.9195  |
| NOS2          | 4.2387  | 1.1026 | 15.5270 | 8.13E-05 | 5.17E-03 | 18.8790 |
| CLUAP1        | 4.7907  | 1.3467 | 15.5236 | 8.15E-05 | 5.17E-03 | 27.6788 |
| CSMD3         | 4.5173  | 1.1751 | 15.5101 | 8.21E-05 | 5.18E-03 | 22.9003 |
| PSMC3         | 3.5052  | 1.7274 | 15.4944 | 8.27E-05 | 5.20E-03 | 11.3544 |
| MOSPD3        | 2.9276  | 0.8387 | 15.4794 | 8.34E-05 | 5.21E-03 | 7.6083  |
| RP11-430C1.2  | 2.8944  | 0.7771 | 15.4369 | 8.53E-05 | 5.30E-03 | 7.4352  |
| MYCBPAP       | 3.9448  | 0.8961 | 15.4079 | 8.66E-05 | 5.35E-03 | 15.3993 |
| KIF5C         | 4.5135  | 3.0546 | 15.3745 | 8.82E-05 | 5.38E-03 | 22.8401 |
| BEST4         | -4.0470 | 1.2244 | 15.3566 | 8.90E-05 | 5.38E-03 | 0.0605  |
| RP4-639F20.1  | 3.6634  | 0.7633 | 15.3542 | 8.91E-05 | 5.38E-03 | 12.6704 |
| CADPS         | 4.7960  | 2.2523 | 15.3505 | 8.93E-05 | 5.38E-03 | 27.7797 |
| RP11-315A16.1 | 4.0212  | 0.9810 | 15.3481 | 8.94E-05 | 5.38E-03 | 16.2372 |
| PPEF1         | 3.7501  | 0.8278 | 15.3326 | 9.01E-05 | 5.40E-03 | 13.4553 |
| PTK7          | 4.2440  | 0.9204 | 15.3219 | 9.07E-05 | 5.40E-03 | 18.9487 |
| AVL9          | 3.1422  | 3.5953 | 15.3007 | 9.17E-05 | 5.43E-03 | 8.8285  |
| MYPN          | -4.3098 | 1.1131 | 15.2541 | 9.40E-05 | 5.53E-03 | 0.0504  |
| DBNL          | -2.9564 | 6.8255 | 15.2443 | 9.45E-05 | 5.53E-03 | 0.1288  |
| HEATR3        | 2.6042  | 0.7579 | 15.2398 | 9.47E-05 | 5.53E-03 | 6.0807  |
| TRIM3         | 3.4306  | 1.3220 | 15.2142 | 9.60E-05 | 5.57E-03 | 10.7821 |

|               |         |        |         |          |          |         |
|---------------|---------|--------|---------|----------|----------|---------|
| ANO4          | 3.0810  | 0.6461 | 15.1854 | 9.75E-05 | 5.63E-03 | 8.4619  |
| CACNB4        | 4.3542  | 1.0960 | 15.1319 | 1.00E-04 | 5.74E-03 | 20.4520 |
| DNM3OS        | 4.3245  | 2.4476 | 15.1301 | 1.00E-04 | 5.74E-03 | 20.0360 |
| LYPLAL1       | 4.8044  | 1.7287 | 15.1164 | 1.01E-04 | 5.75E-03 | 27.9425 |
| CTC-207P7.1   | 3.6366  | 0.8305 | 15.1003 | 1.02E-04 | 5.78E-03 | 12.4377 |
| RP11-369K17.1 | 4.4447  | 1.0093 | 15.0849 | 1.03E-04 | 5.79E-03 | 21.7761 |
| ST7L          | 3.3382  | 0.7781 | 15.0773 | 1.03E-04 | 5.79E-03 | 10.1134 |
| RP1-274L7.4   | 3.5369  | 1.0350 | 15.0593 | 1.04E-04 | 5.79E-03 | 11.6071 |
| HMG20B        | 4.5513  | 1.2237 | 15.0502 | 1.05E-04 | 5.79E-03 | 23.4466 |
| NPR3          | 3.0577  | 0.8374 | 15.0449 | 1.05E-04 | 5.79E-03 | 8.3263  |
| MAPK6         | -2.2731 | 7.4329 | 15.0393 | 1.05E-04 | 5.79E-03 | 0.2069  |
| LRP4-AS1      | 3.5141  | 0.9228 | 15.0000 | 1.08E-04 | 5.86E-03 | 11.4251 |
| RP11-637A17.2 | 4.1134  | 0.9976 | 14.9992 | 1.08E-04 | 5.86E-03 | 17.3087 |
| ACAP3*        | 3.5371  | 1.3390 | 14.9757 | 1.09E-04 | 5.87E-03 | 11.6086 |
| MUL1          | -3.7682 | 5.8426 | 14.9781 | 1.09E-04 | 5.87E-03 | 0.0734  |
| GTDC1         | 5.7224  | 2.9773 | 14.9715 | 1.09E-04 | 5.87E-03 | 52.7983 |
| AC116366.6    | 2.6614  | 0.9501 | 14.9608 | 1.10E-04 | 5.87E-03 | 6.3264  |
| ZNF181        | 5.6063  | 1.8379 | 14.9384 | 1.11E-04 | 5.92E-03 | 48.7140 |
| PPP5D1        | 3.2608  | 0.9467 | 14.9251 | 1.12E-04 | 5.92E-03 | 9.5854  |
| NRN1          | 3.6272  | 0.7780 | 14.9182 | 1.12E-04 | 5.92E-03 | 12.3562 |
| YIPF4         | 2.5418  | 6.0313 | 14.9034 | 1.13E-04 | 5.94E-03 | 5.8233  |
| CTB-111H14.1  | 4.0536  | 1.1343 | 14.8930 | 1.14E-04 | 5.95E-03 | 16.6055 |
| MED12L        | 4.1383  | 0.9716 | 14.8845 | 1.14E-04 | 5.95E-03 | 17.6100 |
| TMEM170A      | -2.6796 | 4.6863 | 14.8706 | 1.15E-04 | 5.95E-03 | 0.1561  |
| C15orf41      | 3.3509  | 3.0892 | 14.8618 | 1.16E-04 | 5.95E-03 | 10.2030 |
| HELB          | 3.2755  | 0.8562 | 14.8594 | 1.16E-04 | 5.95E-03 | 9.6833  |
| RALGPS1       | 5.0891  | 2.3858 | 14.8386 | 1.17E-04 | 5.99E-03 | 34.0377 |
| HUWE1         | -3.2119 | 6.5856 | 14.8279 | 1.18E-04 | 6.00E-03 | 0.1079  |
| ANK1          | 3.8407  | 0.7653 | 14.8192 | 1.18E-04 | 6.00E-03 | 14.3269 |
| RINL          | 3.8336  | 0.9552 | 14.7828 | 1.21E-04 | 6.08E-03 | 14.2565 |
| NOVA2         | 6.3502  | 5.5779 | 14.7772 | 1.21E-04 | 6.08E-03 | 81.5844 |
| IGF2          | 3.9037  | 1.9587 | 14.7515 | 1.23E-04 | 6.12E-03 | 14.9664 |
| COL1A1        | 4.9831  | 3.0188 | 14.7474 | 1.23E-04 | 6.12E-03 | 31.6283 |
| FOXD2-AS1     | -4.7628 | 1.7948 | 14.6800 | 1.27E-04 | 6.28E-03 | 0.0368  |
| VEZT          | -3.0955 | 3.0156 | 14.6760 | 1.28E-04 | 6.28E-03 | 0.1170  |
| RNF165        | 4.5498  | 1.7821 | 14.6727 | 1.28E-04 | 6.28E-03 | 23.4220 |
| MTR           | 5.2052  | 2.7740 | 14.6594 | 1.29E-04 | 6.28E-03 | 36.8909 |
| ARAP1         | 5.0164  | 1.4605 | 14.6529 | 1.29E-04 | 6.28E-03 | 32.3666 |
| RP11-467D6.1  | 4.5751  | 1.9019 | 14.6523 | 1.29E-04 | 6.28E-03 | 23.8370 |
| FAM212B*      | 3.2582  | 1.1405 | 14.6225 | 1.31E-04 | 6.33E-03 | 9.5681  |
| BRIX1         | 4.3756  | 0.9158 | 14.6206 | 1.31E-04 | 6.33E-03 | 20.7575 |

|               |         |        |         |          |          |         |
|---------------|---------|--------|---------|----------|----------|---------|
| EXOSC4        | -2.7005 | 1.1264 | 14.5897 | 1.34E-04 | 6.41E-03 | 0.1538  |
| CTD-2540F13.2 | 3.6531  | 1.2367 | 14.5755 | 1.35E-04 | 6.42E-03 | 12.5806 |
| MX2           | 3.7876  | 2.3653 | 14.5716 | 1.35E-04 | 6.42E-03 | 13.8096 |
| PELO          | 2.3239  | 0.9260 | 14.5636 | 1.36E-04 | 6.42E-03 | 5.0070  |
| DLGAP2        | 4.6459  | 1.1403 | 14.5478 | 1.37E-04 | 6.42E-03 | 25.0350 |
| RP11-702H23.4 | 3.9409  | 1.0111 | 14.5466 | 1.37E-04 | 6.42E-03 | 15.3582 |
| RNLS          | -4.2560 | 2.6139 | 14.5236 | 1.38E-04 | 6.45E-03 | 0.0523  |
| MBD5          | 4.0593  | 1.0013 | 14.5152 | 1.39E-04 | 6.45E-03 | 16.6716 |
| RASGEF1A      | 3.0352  | 0.9205 | 14.5107 | 1.39E-04 | 6.45E-03 | 8.1975  |
| ALKBH2        | 5.3287  | 1.4198 | 14.5088 | 1.40E-04 | 6.45E-03 | 40.1868 |
| ACE           | 3.3038  | 1.1008 | 14.4888 | 1.41E-04 | 6.47E-03 | 9.8754  |
| UQCC1         | 3.7884  | 1.0692 | 14.4830 | 1.41E-04 | 6.47E-03 | 13.8169 |
| CCDC88A       | 4.6572  | 2.0545 | 14.4791 | 1.42E-04 | 6.47E-03 | 25.2320 |
| CD28          | 3.3316  | 0.7604 | 14.4606 | 1.43E-04 | 6.51E-03 | 10.0675 |
| COQ5          | 2.6403  | 0.8363 | 14.4418 | 1.45E-04 | 6.53E-03 | 6.2347  |
| RP11-266L9.2  | 3.8725  | 0.9380 | 14.4387 | 1.45E-04 | 6.53E-03 | 14.6472 |
| CASS4         | 3.5546  | 1.1297 | 14.4340 | 1.45E-04 | 6.53E-03 | 11.7504 |
| TMF1          | -2.9172 | 5.3879 | 14.4026 | 1.48E-04 | 6.57E-03 | 0.1324  |
| BEST2         | -4.9653 | 2.2313 | 14.3974 | 1.48E-04 | 6.57E-03 | 0.0320  |
| FZD3          | 3.9618  | 2.4536 | 14.3875 | 1.49E-04 | 6.57E-03 | 15.5820 |
| OLR1          | -3.6267 | 5.4906 | 14.3816 | 1.49E-04 | 6.57E-03 | 0.0810  |
| CD1A          | 5.5848  | 1.5779 | 14.3795 | 1.49E-04 | 6.57E-03 | 47.9948 |
| LINC01197     | 3.5002  | 0.9416 | 14.3785 | 1.50E-04 | 6.57E-03 | 11.3150 |
| EVC2          | 4.9501  | 1.0229 | 14.3674 | 1.50E-04 | 6.57E-03 | 30.9113 |
| PLAG1         | 4.3632  | 1.6223 | 14.3581 | 1.51E-04 | 6.57E-03 | 20.5798 |
| ZNF140        | 3.8700  | 0.8188 | 14.3563 | 1.51E-04 | 6.57E-03 | 14.6214 |
| KIAA0319      | 3.5011  | 0.9958 | 14.3408 | 1.53E-04 | 6.60E-03 | 11.3221 |
| L3MBTL4       | 3.5094  | 0.8587 | 14.3298 | 1.53E-04 | 6.62E-03 | 11.3878 |
| VMA21         | -4.4390 | 1.3665 | 14.2965 | 1.56E-04 | 6.69E-03 | 0.0461  |
| CREB5         | 4.3403  | 2.5211 | 14.2961 | 1.56E-04 | 6.69E-03 | 20.2558 |
| CLMN          | -2.9098 | 5.0067 | 14.2690 | 1.58E-04 | 6.76E-03 | 0.1331  |
| FXVD6         | 5.0078  | 1.1866 | 14.2568 | 1.59E-04 | 6.77E-03 | 32.1742 |
| RP11-61L19.1  | 4.5266  | 1.2297 | 14.2435 | 1.61E-04 | 6.77E-03 | 23.0492 |
| SLC26A4-AS1   | 3.4784  | 1.1730 | 14.2415 | 1.61E-04 | 6.77E-03 | 11.1456 |
| FAT3          | 3.7661  | 2.2001 | 14.2370 | 1.61E-04 | 6.77E-03 | 13.6055 |
| IGF1R         | 3.4273  | 1.5140 | 14.2024 | 1.64E-04 | 6.79E-03 | 10.7581 |
| PCBD2         | 4.8086  | 2.0108 | 14.2005 | 1.64E-04 | 6.79E-03 | 28.0247 |
| NANOG         | 4.6547  | 1.0439 | 14.1838 | 1.66E-04 | 6.79E-03 | 25.1885 |
| AC025284.1    | 5.0678  | 1.5575 | 14.1732 | 1.67E-04 | 6.79E-03 | 33.5389 |
| STK33         | 3.5074  | 1.0705 | 14.1690 | 1.67E-04 | 6.79E-03 | 11.3722 |
| ZKSCAN5       | 2.5328  | 0.7045 | 14.1683 | 1.67E-04 | 6.79E-03 | 5.7871  |

|               |         |        |         |          |          |          |
|---------------|---------|--------|---------|----------|----------|----------|
| LYN           | 3.7697  | 3.7583 | 14.1666 | 1.67E-04 | 6.79E-03 | 13.6395  |
| ANKRD17       | -2.8973 | 4.6272 | 14.1655 | 1.67E-04 | 6.79E-03 | 0.1342   |
| TUBGCP5       | 3.4791  | 0.7490 | 14.1631 | 1.68E-04 | 6.79E-03 | 11.1510  |
| MIR17HG       | 3.0262  | 0.7829 | 14.1508 | 1.69E-04 | 6.79E-03 | 8.1466   |
| ZNF496        | 4.9141  | 1.5336 | 14.1480 | 1.69E-04 | 6.79E-03 | 30.1511  |
| COL19A1       | 3.2042  | 0.9617 | 14.1447 | 1.69E-04 | 6.79E-03 | 9.2163   |
| CDK5RAP2      | 5.0035  | 1.8763 | 14.1438 | 1.69E-04 | 6.79E-03 | 32.0787  |
| AP000708.1    | 5.6077  | 2.0461 | 14.1398 | 1.70E-04 | 6.79E-03 | 48.7616  |
| LHX5          | 4.2484  | 1.5417 | 14.1298 | 1.71E-04 | 6.80E-03 | 19.0061  |
| RP11-664H7.2  | 4.5992  | 1.1754 | 14.1187 | 1.72E-04 | 6.82E-03 | 24.2379  |
| CCDC135       | 4.0108  | 1.0185 | 14.0563 | 1.77E-04 | 6.98E-03 | 16.1198  |
| RP11-354K4.1  | 2.4249  | 0.7147 | 14.0552 | 1.78E-04 | 6.98E-03 | 5.3701   |
| CXCL11        | 5.2178  | 3.5152 | 14.0510 | 1.78E-04 | 6.98E-03 | 37.2140  |
| AP1S2         | -3.2928 | 3.8951 | 14.0475 | 1.78E-04 | 6.98E-03 | 0.1020   |
| CYTH3         | 3.4656  | 0.8024 | 14.0393 | 1.79E-04 | 6.99E-03 | 11.0471  |
| FMO1          | 3.5742  | 1.7214 | 14.0156 | 1.81E-04 | 6.99E-03 | 11.9109  |
| STK24         | 4.0898  | 1.6061 | 14.0136 | 1.81E-04 | 6.99E-03 | 17.0275  |
| TMEM138       | 3.6601  | 1.2359 | 14.0021 | 1.83E-04 | 6.99E-03 | 12.6413  |
| POLD3         | 2.8251  | 2.7621 | 14.0018 | 1.83E-04 | 6.99E-03 | 7.0865   |
| LSAMP         | 4.2183  | 1.3798 | 14.0015 | 1.83E-04 | 6.99E-03 | 18.6137  |
| RP11-159H10.3 | 3.5300  | 1.1173 | 14.0002 | 1.83E-04 | 6.99E-03 | 11.5512  |
| RP11-1C8.5    | 4.5480  | 1.5300 | 13.9922 | 1.84E-04 | 6.99E-03 | 23.3930  |
| FMO4          | -4.1353 | 1.1098 | 13.9824 | 1.85E-04 | 6.99E-03 | 0.0569   |
| ANKRD26       | 4.4219  | 1.1097 | 13.9790 | 1.85E-04 | 6.99E-03 | 21.4349  |
| RP11-82O19.1  | 5.3787  | 1.9478 | 13.9767 | 1.85E-04 | 6.99E-03 | 41.6045  |
| SLC16A1-AS1   | 3.5448  | 3.0792 | 13.9602 | 1.87E-04 | 7.03E-03 | 11.6702  |
| XKR4*         | 5.1157  | 2.7999 | 13.9326 | 1.89E-04 | 7.06E-03 | 34.6715  |
| GFOD1         | 3.4463  | 1.8775 | 13.9389 | 1.89E-04 | 7.06E-03 | 10.9007  |
| FANCE         | 3.2295  | 0.8866 | 13.9327 | 1.89E-04 | 7.06E-03 | 9.3797   |
| NAV1          | 4.9857  | 4.8321 | 13.9219 | 1.91E-04 | 7.08E-03 | 31.6842  |
| EGR3          | 3.5201  | 6.5915 | 13.9040 | 1.92E-04 | 7.13E-03 | 11.4727  |
| CACNG8*       | 3.9063  | 1.6536 | 13.8691 | 1.96E-04 | 7.19E-03 | 14.9935  |
| RP11-410C4.5  | 3.1399  | 0.6855 | 13.8808 | 1.95E-04 | 7.19E-03 | 8.8147   |
| HIPK3         | -3.3028 | 6.3631 | 13.8749 | 1.95E-04 | 7.19E-03 | 0.1013   |
| CHD5          | 3.1453  | 0.7519 | 13.8571 | 1.97E-04 | 7.21E-03 | 8.8479   |
| MAD1L1        | 3.6872  | 0.9190 | 13.8074 | 2.03E-04 | 7.35E-03 | 12.8817  |
| NTRK3         | 4.6671  | 2.3416 | 13.8042 | 2.03E-04 | 7.35E-03 | 25.4066  |
| NCS1          | 4.3215  | 1.8618 | 13.8034 | 2.03E-04 | 7.35E-03 | 19.9939  |
| WDR87         | 6.9593  | 7.9770 | 13.7929 | 2.04E-04 | 7.36E-03 | 124.4427 |
| RP11-515O17.3 | 3.7081  | 1.7730 | 13.7909 | 2.04E-04 | 7.36E-03 | 13.0688  |
| AGER          | -3.9688 | 0.8574 | 13.7652 | 2.07E-04 | 7.43E-03 | 0.0639   |



|               |         |        |         |          |          |          |
|---------------|---------|--------|---------|----------|----------|----------|
| SMYD3         | 2.4830  | 0.6003 | 13.7566 | 2.08E-04 | 7.45E-03 | 5.5907   |
| BMPR2         | -2.6892 | 6.6002 | 13.7300 | 2.11E-04 | 7.49E-03 | 0.1550   |
| RAB3D         | -3.5485 | 3.5158 | 13.7284 | 2.11E-04 | 7.49E-03 | 0.0855   |
| GPS2          | 3.4601  | 4.6375 | 13.7273 | 2.11E-04 | 7.49E-03 | 11.0054  |
| NR2C1         | 3.7131  | 1.0810 | 13.7185 | 2.12E-04 | 7.51E-03 | 13.1143  |
| RAI2          | -4.6739 | 1.4352 | 13.7022 | 2.14E-04 | 7.52E-03 | 0.0392   |
| CPED1         | 3.2122  | 0.8465 | 13.6965 | 2.15E-04 | 7.52E-03 | 9.2679   |
| RP11-439E19.7 | 3.1787  | 0.9640 | 13.6912 | 2.15E-04 | 7.52E-03 | 9.0547   |
| NUAK1         | 2.3712  | 0.6500 | 13.6912 | 2.15E-04 | 7.52E-03 | 5.1738   |
| RPS6KA6       | 3.8847  | 1.8747 | 13.6609 | 2.19E-04 | 7.62E-03 | 14.7715  |
| ATP7B         | -3.6471 | 1.0002 | 13.6456 | 2.21E-04 | 7.64E-03 | 0.0798   |
| CTD-2008L17.2 | 4.3444  | 1.8668 | 13.6449 | 2.21E-04 | 7.64E-03 | 20.3146  |
| LGSN          | 4.4770  | 1.3718 | 13.6377 | 2.22E-04 | 7.65E-03 | 22.2699  |
| BEND4         | 3.2641  | 0.9454 | 13.6303 | 2.23E-04 | 7.66E-03 | 9.6071   |
| RP11-473P24.2 | 3.5975  | 2.2325 | 13.6172 | 2.24E-04 | 7.69E-03 | 12.1049  |
| CASP4         | 3.4990  | 3.6283 | 13.5770 | 2.29E-04 | 7.83E-03 | 11.3059  |
| IGHA1         | 3.5132  | 0.8297 | 13.5606 | 2.31E-04 | 7.87E-03 | 11.4176  |
| IKZF4         | 4.7194  | 1.6931 | 13.5515 | 2.32E-04 | 7.89E-03 | 26.3431  |
| RGMA          | 3.2984  | 0.9682 | 13.5464 | 2.33E-04 | 7.89E-03 | 9.8381   |
| RP11-440G5.2  | 4.0637  | 0.8745 | 13.5246 | 2.35E-04 | 7.95E-03 | 16.7227  |
| ZNF445        | 4.6256  | 1.8537 | 13.5117 | 2.37E-04 | 7.95E-03 | 24.6862  |
| CTD-2566J3.1  | -5.7590 | 3.4835 | 13.5070 | 2.38E-04 | 7.95E-03 | 0.0185   |
| PCDHA4        | 3.5141  | 1.0231 | 13.5008 | 2.38E-04 | 7.95E-03 | 11.4247  |
| LINC00998     | -3.1558 | 2.6046 | 13.4894 | 2.40E-04 | 7.95E-03 | 0.1122   |
| RP11-626H12.2 | 3.5449  | 1.0019 | 13.4893 | 2.40E-04 | 7.95E-03 | 11.6715  |
| MAEL          | 3.1887  | 0.8732 | 13.4883 | 2.40E-04 | 7.95E-03 | 9.1179   |
| PDE10A        | 3.6714  | 1.0463 | 13.4865 | 2.40E-04 | 7.95E-03 | 12.7407  |
| ZSCAN30       | 2.9566  | 0.7568 | 13.4806 | 2.41E-04 | 7.95E-03 | 7.7630   |
| MOSPD2        | 4.5899  | 4.0835 | 13.4778 | 2.41E-04 | 7.95E-03 | 24.0816  |
| KIAA1147      | -3.9200 | 1.4921 | 13.4607 | 2.44E-04 | 8.00E-03 | 0.0661   |
| LINC01320     | 4.4752  | 1.2909 | 13.4486 | 2.45E-04 | 8.03E-03 | 22.2423  |
| SLC22A11      | 4.9057  | 1.2064 | 13.4213 | 2.49E-04 | 8.11E-03 | 29.9746  |
| WDR65         | 8.2175  | 5.9416 | 13.4168 | 2.49E-04 | 8.11E-03 | 297.6479 |
| ASCC3         | 4.1096  | 1.7542 | 13.4127 | 2.50E-04 | 8.11E-03 | 17.2623  |
| TMEM63A       | 4.2447  | 1.5663 | 13.4027 | 2.51E-04 | 8.11E-03 | 18.9575  |
| HIBCH         | 2.9970  | 1.8046 | 13.4019 | 2.51E-04 | 8.11E-03 | 7.9833   |
| YEATS4        | 2.6872  | 0.6890 | 13.3956 | 2.52E-04 | 8.11E-03 | 6.4407   |
| MZT2A         | 4.0497  | 1.1278 | 13.3929 | 2.53E-04 | 8.11E-03 | 16.5604  |
| FAM179A       | 4.3316  | 1.9675 | 13.3738 | 2.55E-04 | 8.13E-03 | 20.1341  |
| ABCA12        | 4.3665  | 1.3102 | 13.3729 | 2.55E-04 | 8.13E-03 | 20.6281  |
| TIMP3         | 4.7861  | 1.1397 | 13.3709 | 2.56E-04 | 8.13E-03 | 27.5911  |

|               |         |        |         |          |          |         |
|---------------|---------|--------|---------|----------|----------|---------|
| RP11-285E9.5  | 5.7780  | 1.9806 | 13.3675 | 2.56E-04 | 8.13E-03 | 54.8713 |
| COL21A1       | 2.9607  | 0.7901 | 13.3428 | 2.59E-04 | 8.20E-03 | 7.7853  |
| ARMC9         | 4.1384  | 1.3335 | 13.3416 | 2.60E-04 | 8.20E-03 | 17.6109 |
| C17orf105     | 4.6240  | 1.5861 | 13.3280 | 2.61E-04 | 8.23E-03 | 24.6587 |
| KATNA1        | -3.2233 | 0.8512 | 13.2981 | 2.66E-04 | 8.33E-03 | 0.1071  |
| RP11-216P16.8 | -5.2057 | 1.1747 | 13.2950 | 2.66E-04 | 8.33E-03 | 0.0271  |
| PRKAG1        | 3.8582  | 2.5100 | 13.2618 | 2.71E-04 | 8.46E-03 | 14.5023 |
| RP11-654D12.3 | 3.4855  | 0.8469 | 13.2513 | 2.72E-04 | 8.49E-03 | 11.2006 |
| ABCC4         | 6.1645  | 2.6441 | 13.2385 | 2.74E-04 | 8.51E-03 | 71.7320 |
| SFI1          | 4.4274  | 1.5880 | 13.2352 | 2.75E-04 | 8.51E-03 | 21.5163 |
| AC004076.5    | 2.7161  | 1.3366 | 13.2286 | 2.76E-04 | 8.51E-03 | 6.5708  |
| SIPA1L1       | 5.1611  | 3.1637 | 13.2253 | 2.76E-04 | 8.51E-03 | 35.7801 |
| SLC25A45      | 3.0747  | 1.0538 | 13.1920 | 2.81E-04 | 8.64E-03 | 8.4254  |
| RP11-338E21.2 | 2.9053  | 0.8667 | 13.1846 | 2.82E-04 | 8.65E-03 | 7.4920  |
| ITPR1         | 2.4653  | 0.6442 | 13.1805 | 2.83E-04 | 8.65E-03 | 5.5224  |
| INHBA-AS1     | 3.6713  | 0.8947 | 13.1755 | 2.84E-04 | 8.65E-03 | 12.7402 |
| PARVB         | 2.4208  | 0.6053 | 13.1636 | 2.85E-04 | 8.68E-03 | 5.3546  |
| UHRF2         | 4.3799  | 2.1678 | 13.1553 | 2.87E-04 | 8.69E-03 | 20.8200 |
| IGLON5        | 4.3513  | 1.2658 | 13.1515 | 2.87E-04 | 8.69E-03 | 20.4109 |
| C1GALT1       | 2.9135  | 3.2152 | 13.1425 | 2.89E-04 | 8.71E-03 | 7.5346  |
| SF3A3         | 4.6814  | 1.9348 | 13.1241 | 2.92E-04 | 8.77E-03 | 25.6594 |
| EFR3B         | 4.3769  | 1.6105 | 13.1151 | 2.93E-04 | 8.78E-03 | 20.7774 |
| RP11-214K3.24 | 4.6500  | 1.3755 | 13.1122 | 2.93E-04 | 8.78E-03 | 25.1068 |
| NAPB          | -4.9529 | 2.4958 | 13.0997 | 2.95E-04 | 8.82E-03 | 0.0323  |
| AL136380.1    | 3.5018  | 2.1097 | 13.0821 | 2.98E-04 | 8.82E-03 | 11.3279 |
| RP11-383H13.1 | 3.5369  | 1.3302 | 13.0756 | 2.99E-04 | 8.82E-03 | 11.6066 |
| C14orf64      | 3.4882  | 1.6013 | 13.0732 | 3.00E-04 | 8.82E-03 | 11.2213 |
| RP11-43F13.3  | 3.9976  | 1.3430 | 13.0728 | 3.00E-04 | 8.82E-03 | 15.9734 |
| AGBL2         | 3.7528  | 1.1497 | 13.0720 | 3.00E-04 | 8.82E-03 | 13.4807 |
| B3GALT1       | 3.0611  | 0.9057 | 13.0701 | 3.00E-04 | 8.82E-03 | 8.3460  |
| ASPSCR1       | 2.3256  | 0.9529 | 13.0619 | 3.01E-04 | 8.82E-03 | 5.0126  |
| SLC25A51      | -3.4298 | 1.8917 | 13.0615 | 3.01E-04 | 8.82E-03 | 0.0928  |
| TNFAIP2       | 3.4181  | 6.9092 | 13.0534 | 3.03E-04 | 8.84E-03 | 10.6897 |
| STAG1         | 2.6655  | 0.8163 | 13.0389 | 3.05E-04 | 8.87E-03 | 6.3445  |
| ILDR1         | 4.7429  | 1.8169 | 13.0373 | 3.05E-04 | 8.87E-03 | 26.7775 |
| GRIP1         | 4.3312  | 1.1387 | 12.9986 | 3.12E-04 | 9.00E-03 | 20.1284 |
| RCL1          | 3.9372  | 0.9452 | 12.9955 | 3.12E-04 | 9.00E-03 | 15.3179 |
| DOCK7         | 2.4401  | 0.7404 | 12.9947 | 3.12E-04 | 9.00E-03 | 5.4267  |
| JAK3          | 3.2134  | 1.1582 | 12.9870 | 3.14E-04 | 9.02E-03 | 9.2754  |
| SEPT11        | 2.7665  | 5.8887 | 12.9669 | 3.17E-04 | 9.08E-03 | 6.8045  |
| DDR1          | -2.2170 | 4.8351 | 12.9604 | 3.18E-04 | 9.08E-03 | 0.2151  |

|               |         |        |         |          |          |          |
|---------------|---------|--------|---------|----------|----------|----------|
| NPM3          | 5.3581  | 2.8083 | 12.9562 | 3.19E-04 | 9.08E-03 | 41.0151  |
| FYN           | 3.3709  | 1.2739 | 12.9554 | 3.19E-04 | 9.08E-03 | 10.3453  |
| RP11-109N23.5 | 2.8099  | 2.3910 | 12.9278 | 3.24E-04 | 9.19E-03 | 7.0123   |
| HIST1H3D      | 7.4636  | 5.1277 | 12.9146 | 3.26E-04 | 9.22E-03 | 176.5133 |
| NUP88         | 2.8259  | 0.8403 | 12.9127 | 3.26E-04 | 9.22E-03 | 7.0905   |
| QSOX2         | 4.0329  | 1.0100 | 12.9009 | 3.28E-04 | 9.24E-03 | 16.3693  |
| PDGFD         | 5.8555  | 1.7106 | 12.8994 | 3.29E-04 | 9.24E-03 | 57.9008  |
| RP11-788M5.3  | 3.8596  | 0.9698 | 12.8839 | 3.31E-04 | 9.28E-03 | 14.5168  |
| KRI1          | 2.8582  | 0.8075 | 12.8783 | 3.32E-04 | 9.28E-03 | 7.2510   |
| CUX2          | 3.9329  | 1.4092 | 12.8754 | 3.33E-04 | 9.28E-03 | 15.2733  |
| NCLN          | -4.3382 | 2.1112 | 12.8735 | 3.33E-04 | 9.28E-03 | 0.0494   |
| NAT2          | 2.6743  | 1.2741 | 12.8624 | 3.35E-04 | 9.28E-03 | 6.3831   |
| RP11-64D24.4  | 4.8163  | 1.7451 | 12.8578 | 3.36E-04 | 9.28E-03 | 28.1750  |
| CTD-2269F5.1  | 3.2003  | 0.9121 | 12.8571 | 3.36E-04 | 9.28E-03 | 9.1916   |
| RP11-759A24.3 | 4.8001  | 1.0341 | 12.8549 | 3.37E-04 | 9.28E-03 | 27.8594  |
| RP11-296A18.3 | 4.3558  | 1.3546 | 12.8416 | 3.39E-04 | 9.31E-03 | 20.4745  |
| HMGB3P5       | 3.8981  | 1.2081 | 12.8390 | 3.39E-04 | 9.31E-03 | 14.9092  |
| DDHD2         | 4.0079  | 1.3212 | 12.8338 | 3.40E-04 | 9.31E-03 | 16.0882  |
| SCYL2         | -2.5468 | 6.5706 | 12.8315 | 3.41E-04 | 9.31E-03 | 0.1711   |
| UGT1A7        | 3.4428  | 0.8758 | 12.7999 | 3.47E-04 | 9.45E-03 | 10.8742  |
| PLEKHH3       | 3.4954  | 1.1372 | 12.7793 | 3.50E-04 | 9.53E-03 | 11.2775  |
| PPM1K         | 4.0158  | 2.7514 | 12.7757 | 3.51E-04 | 9.53E-03 | 16.1761  |
| CNN1          | 5.0001  | 1.8403 | 12.7580 | 3.54E-04 | 9.59E-03 | 32.0012  |
| TMTC1         | 3.6514  | 0.8218 | 12.7490 | 3.56E-04 | 9.62E-03 | 12.5657  |
| PPIH          | -3.9731 | 0.8318 | 12.7251 | 3.61E-04 | 9.71E-03 | 0.0637   |
| ISL1          | 2.9982  | 0.7966 | 12.7235 | 3.61E-04 | 9.71E-03 | 7.9898   |
| ZNF788        | 3.1332  | 0.9844 | 12.7150 | 3.63E-04 | 9.73E-03 | 8.7736   |
| KCNJ16        | 4.1747  | 1.5172 | 12.6973 | 3.66E-04 | 9.80E-03 | 18.0593  |
| NTNG1         | 4.0197  | 1.0932 | 12.6919 | 3.67E-04 | 9.80E-03 | 16.2203  |
| RP11-335K5.2  | 3.8186  | 1.1753 | 12.6748 | 3.71E-04 | 9.86E-03 | 14.1099  |
| TIGD6         | 3.8662  | 0.9340 | 12.6663 | 3.72E-04 | 9.86E-03 | 14.5826  |
| EIF5          | -2.3202 | 6.3340 | 12.6627 | 3.73E-04 | 9.86E-03 | 0.2002   |
| KIAA1328      | 3.8841  | 1.0110 | 12.6577 | 3.74E-04 | 9.86E-03 | 14.7652  |
| CSMD2         | 3.3476  | 0.9109 | 12.6554 | 3.74E-04 | 9.86E-03 | 10.1795  |
| COL25A1       | 3.0976  | 0.9285 | 12.6550 | 3.75E-04 | 9.86E-03 | 8.5598   |
| ROCK2         | 2.5654  | 4.7743 | 12.6509 | 3.75E-04 | 9.86E-03 | 5.9190   |
| PMVK          | -2.7730 | 0.9398 | 12.6377 | 3.78E-04 | 9.91E-03 | 0.1463   |
| PHF11         | -4.5398 | 3.8647 | 12.6322 | 3.79E-04 | 9.91E-03 | 0.0430   |
| POLR1B        | 4.3396  | 1.2471 | 12.6170 | 3.82E-04 | 9.96E-03 | 20.2468  |
| CRB1          | 3.3559  | 1.8708 | 12.6145 | 3.83E-04 | 9.96E-03 | 10.2380  |
| LIMCH1        | -4.0990 | 2.8548 | 12.6099 | 3.84E-04 | 9.97E-03 | 0.0584   |

|               |         |        |         |          |          |         |
|---------------|---------|--------|---------|----------|----------|---------|
| ITPR2         | 2.6603  | 1.0503 | 12.5917 | 3.87E-04 | 1.00E-02 | 6.3216  |
| TDRD12        | 5.2249  | 3.1337 | 12.5866 | 3.89E-04 | 1.00E-02 | 37.3987 |
| MTND1P4       | 4.2712  | 1.5564 | 12.5706 | 3.92E-04 | 1.01E-02 | 19.3091 |
| C19orf66      | -3.0256 | 3.6354 | 12.5678 | 3.92E-04 | 1.01E-02 | 0.1228  |
| LIN7B         | 3.1702  | 0.8593 | 12.5661 | 3.93E-04 | 1.01E-02 | 9.0017  |
| DGKB          | 2.3726  | 0.8396 | 12.5232 | 4.02E-04 | 1.03E-02 | 5.1789  |
| ZNF500        | 2.7896  | 0.7140 | 12.5185 | 4.03E-04 | 1.03E-02 | 6.9146  |
| TRAF3IP2      | -2.8479 | 3.7948 | 12.5096 | 4.05E-04 | 1.03E-02 | 0.1389  |
| SLC12A5       | 5.6606  | 1.1733 | 12.5041 | 4.06E-04 | 1.03E-02 | 50.5823 |
| ANGPT1        | 2.7563  | 0.6482 | 12.4927 | 4.09E-04 | 1.04E-02 | 6.7566  |
| CPS1          | 3.9250  | 2.3817 | 12.4846 | 4.10E-04 | 1.04E-02 | 15.1900 |
| PTPN7         | 3.2904  | 1.0221 | 12.4819 | 4.11E-04 | 1.04E-02 | 9.7841  |
| ZNF350        | 2.7020  | 0.9769 | 12.4771 | 4.12E-04 | 1.04E-02 | 6.5071  |
| FAM76B        | 3.9441  | 2.5891 | 12.4753 | 4.12E-04 | 1.04E-02 | 15.3917 |
| HOXB13        | 3.1326  | 2.1837 | 12.4655 | 4.15E-04 | 1.04E-02 | 8.7703  |
| TERF2IP       | -2.8668 | 7.3165 | 12.4517 | 4.18E-04 | 1.05E-02 | 0.1371  |
| RP1-79C4.4    | 4.2404  | 1.4925 | 12.4350 | 4.21E-04 | 1.05E-02 | 18.9005 |
| FBXO42        | 2.9448  | 1.4531 | 12.4273 | 4.23E-04 | 1.06E-02 | 7.6999  |
| APH1A         | -3.1763 | 3.0540 | 12.4063 | 4.28E-04 | 1.06E-02 | 0.1106  |
| ZNF577        | 2.4320  | 0.7292 | 12.4018 | 4.29E-04 | 1.06E-02 | 5.3965  |
| STAT5A        | 4.0492  | 1.0799 | 12.3988 | 4.30E-04 | 1.06E-02 | 16.5550 |
| NWD2          | -3.2170 | 0.8084 | 12.3963 | 4.30E-04 | 1.06E-02 | 0.1075  |
| HMGB3P19      | 4.6438  | 1.0106 | 12.3833 | 4.33E-04 | 1.07E-02 | 24.9987 |
| POP7          | -4.1651 | 1.1377 | 12.3816 | 4.34E-04 | 1.07E-02 | 0.0557  |
| KPNA1         | -2.7763 | 4.1577 | 12.3814 | 4.34E-04 | 1.07E-02 | 0.1460  |
| CUTA          | -2.7516 | 2.5565 | 12.3752 | 4.35E-04 | 1.07E-02 | 0.1485  |
| SAMD5         | 3.8397  | 1.4152 | 12.3742 | 4.35E-04 | 1.07E-02 | 14.3174 |
| AC069363.1    | 3.9322  | 1.0782 | 12.3630 | 4.38E-04 | 1.07E-02 | 15.2659 |
| ZFC3H1        | 3.7237  | 2.5589 | 12.3392 | 4.44E-04 | 1.08E-02 | 13.2115 |
| RP11-679C8.2  | 3.6519  | 1.2867 | 12.3309 | 4.46E-04 | 1.08E-02 | 12.5695 |
| RP11-503C24.4 | 2.8226  | 0.9830 | 12.3223 | 4.48E-04 | 1.09E-02 | 7.0744  |
| LINC00899     | 2.9227  | 0.9147 | 12.3148 | 4.49E-04 | 1.09E-02 | 7.5829  |
| KBTBD11-OT1   | -4.4882 | 1.3660 | 12.3093 | 4.51E-04 | 1.09E-02 | 0.0446  |
| IARS          | 3.5051  | 0.7961 | 12.3041 | 4.52E-04 | 1.09E-02 | 11.3536 |
| CTD-3088G3.8  | 4.5087  | 2.7502 | 12.3003 | 4.53E-04 | 1.09E-02 | 22.7645 |
| ZNF609        | 2.7862  | 1.0622 | 12.2852 | 4.57E-04 | 1.10E-02 | 6.8982  |
| FAM105A       | -2.3659 | 5.3346 | 12.2740 | 4.59E-04 | 1.10E-02 | 0.1940  |
| ADCY5         | 3.8544  | 0.8905 | 12.2676 | 4.61E-04 | 1.10E-02 | 14.4636 |
| HOXA10        | -3.3733 | 4.9143 | 12.2663 | 4.61E-04 | 1.10E-02 | 0.0965  |
| TNC           | 5.6765  | 5.6851 | 12.2540 | 4.64E-04 | 1.11E-02 | 51.1439 |
| LMTK2         | -3.5740 | 3.9712 | 12.2383 | 4.68E-04 | 1.11E-02 | 0.0840  |

|               |         |        |         |          |          |         |
|---------------|---------|--------|---------|----------|----------|---------|
| RP11-982M15.8 | 4.5725  | 2.2894 | 12.2362 | 4.69E-04 | 1.11E-02 | 23.7934 |
| ACOX3         | -2.9349 | 0.9243 | 12.2125 | 4.75E-04 | 1.12E-02 | 0.1308  |
| CRHR2         | 2.3138  | 0.7151 | 12.2037 | 4.77E-04 | 1.13E-02 | 4.9719  |
| DUSP19        | 3.8405  | 0.9916 | 12.1777 | 4.84E-04 | 1.14E-02 | 14.3252 |
| SLC25A5-AS1   | -3.7892 | 1.1255 | 12.1657 | 4.87E-04 | 1.14E-02 | 0.0723  |
| MATR3         | -2.1400 | 4.9514 | 12.1648 | 4.87E-04 | 1.14E-02 | 0.2269  |
| RHBDF2        | 3.6110  | 1.0155 | 12.1632 | 4.87E-04 | 1.14E-02 | 12.2184 |
| NHS           | 2.9298  | 0.9174 | 12.1566 | 4.89E-04 | 1.14E-02 | 7.6199  |
| PDE1A         | 2.3358  | 0.6093 | 12.1461 | 4.92E-04 | 1.15E-02 | 5.0482  |
| ASH1L         | -2.8993 | 4.9912 | 12.1397 | 4.94E-04 | 1.15E-02 | 0.1340  |
| ANGPTL4       | 3.7393  | 1.2388 | 12.1253 | 4.97E-04 | 1.16E-02 | 13.3545 |
| DCTN1         | 2.5475  | 0.7782 | 12.1235 | 4.98E-04 | 1.16E-02 | 5.8462  |
| RN7SL636P     | 2.6760  | 0.7979 | 12.1062 | 5.03E-04 | 1.16E-02 | 6.3909  |
| C8orf82       | 2.8551  | 1.1576 | 12.0801 | 5.10E-04 | 1.18E-02 | 7.2353  |
| RP11-429P3.4  | 5.8567  | 1.2623 | 12.0733 | 5.12E-04 | 1.18E-02 | 57.9484 |
| U91328.19     | 3.8485  | 1.2563 | 12.0722 | 5.12E-04 | 1.18E-02 | 14.4046 |
| NTAN1         | 2.5503  | 0.8179 | 12.0676 | 5.13E-04 | 1.18E-02 | 5.8574  |
| GABRB2        | 4.6409  | 1.9707 | 12.0641 | 5.14E-04 | 1.18E-02 | 24.9491 |
| GPATCH8       | -3.2128 | 2.3667 | 12.0585 | 5.16E-04 | 1.18E-02 | 0.1079  |
| FAM216B       | 4.1835  | 0.9482 | 12.0435 | 5.20E-04 | 1.19E-02 | 18.1704 |
| RP11-212I21.4 | 2.5144  | 0.8324 | 12.0383 | 5.21E-04 | 1.19E-02 | 5.7135  |
| MITF          | 2.3491  | 0.6486 | 12.0195 | 5.26E-04 | 1.20E-02 | 5.0951  |
| AC016629.8    | 4.0492  | 1.2247 | 12.0168 | 5.27E-04 | 1.20E-02 | 16.5553 |
| GINS4         | 2.6589  | 0.7735 | 12.0121 | 5.29E-04 | 1.20E-02 | 6.3155  |
| RP11-443B7.1  | 2.3304  | 0.6863 | 12.0036 | 5.31E-04 | 1.20E-02 | 5.0294  |
| RP11-169D4.1  | 2.4321  | 0.6550 | 11.9893 | 5.35E-04 | 1.21E-02 | 5.3969  |
| PPP6R2        | 3.0769  | 2.9632 | 11.9891 | 5.35E-04 | 1.21E-02 | 8.4382  |
| LHX9          | 3.0032  | 0.8708 | 11.9653 | 5.42E-04 | 1.22E-02 | 8.0177  |
| TCF23         | 2.7696  | 1.0549 | 11.9416 | 5.49E-04 | 1.23E-02 | 6.8193  |
| LINC00608     | 2.3604  | 0.7970 | 11.9172 | 5.56E-04 | 1.25E-02 | 5.1351  |
| PRKAR1B       | 2.7065  | 0.7055 | 11.9055 | 5.60E-04 | 1.25E-02 | 6.5273  |
| PPCDC         | 3.4443  | 1.3922 | 11.9001 | 5.61E-04 | 1.25E-02 | 10.8849 |
| RLIM          | 2.2641  | 0.8461 | 11.8703 | 5.70E-04 | 1.27E-02 | 4.8036  |
| NAGK          | 3.7129  | 1.2848 | 11.8658 | 5.72E-04 | 1.27E-02 | 13.1129 |
| TMEM56*       | -2.1653 | 6.6609 | 11.8529 | 5.76E-04 | 1.27E-02 | 0.2229  |
| PPIG          | -2.3774 | 5.8812 | 11.8525 | 5.76E-04 | 1.27E-02 | 0.1925  |
| RP11-883A18.3 | 6.1330  | 2.5153 | 11.8418 | 5.79E-04 | 1.28E-02 | 70.1791 |
| TTYH3         | -2.7229 | 6.7538 | 11.8352 | 5.81E-04 | 1.28E-02 | 0.1515  |
| RUVBL1        | 2.3835  | 0.6246 | 11.8240 | 5.85E-04 | 1.29E-02 | 5.2181  |
| DNAJC22       | -3.4127 | 2.9593 | 11.8235 | 5.85E-04 | 1.29E-02 | 0.0939  |
| CTC-277H1.7   | 2.6768  | 0.7511 | 11.8113 | 5.89E-04 | 1.29E-02 | 6.3945  |

|               |         |        |         |          |          |         |
|---------------|---------|--------|---------|----------|----------|---------|
| FTX           | 2.3679  | 0.7607 | 11.8082 | 5.90E-04 | 1.29E-02 | 5.1619  |
| CTB-33O18.3   | 3.3113  | 1.0157 | 11.8047 | 5.91E-04 | 1.29E-02 | 9.9266  |
| ZNF319        | 2.3243  | 0.6846 | 11.7996 | 5.92E-04 | 1.29E-02 | 5.0082  |
| RP4-777D9.2   | 4.3660  | 1.1556 | 11.7912 | 5.95E-04 | 1.29E-02 | 20.6210 |
| RPPH1         | 3.2376  | 2.1546 | 11.7878 | 5.96E-04 | 1.29E-02 | 9.4321  |
| SP6           | -4.9522 | 1.6525 | 11.7851 | 5.97E-04 | 1.29E-02 | 0.0323  |
| RUNX3         | 5.3744  | 4.4411 | 11.7736 | 6.01E-04 | 1.30E-02 | 41.4829 |
| SEC24B        | -3.2817 | 3.6501 | 11.7705 | 6.02E-04 | 1.30E-02 | 0.1028  |
| PCDH7         | 3.6104  | 1.3355 | 11.7687 | 6.02E-04 | 1.30E-02 | 12.2132 |
| SLC15A2       | 3.6186  | 0.9456 | 11.7629 | 6.04E-04 | 1.30E-02 | 12.2829 |
| PTPRC*        | 2.7596  | 5.5875 | 11.7589 | 6.06E-04 | 1.30E-02 | 6.7720  |
| TNFRSF9       | 3.0866  | 0.7435 | 11.7552 | 6.07E-04 | 1.30E-02 | 8.4948  |
| DDX52         | -2.9585 | 2.8313 | 11.7451 | 6.10E-04 | 1.30E-02 | 0.1286  |
| GK3P          | 3.5799  | 1.4378 | 11.7429 | 6.11E-04 | 1.30E-02 | 11.9576 |
| MUC16         | 3.9595  | 1.6312 | 11.7331 | 6.14E-04 | 1.31E-02 | 15.5567 |
| CDH7          | 3.3596  | 1.2853 | 11.7327 | 6.14E-04 | 1.31E-02 | 10.2643 |
| NSMAF         | 3.2957  | 1.3946 | 11.7318 | 6.14E-04 | 1.31E-02 | 9.8198  |
| GFRA1         | 4.5912  | 1.7466 | 11.7127 | 6.21E-04 | 1.32E-02 | 24.1048 |
| DDX10         | 2.5046  | 0.7764 | 11.7065 | 6.23E-04 | 1.32E-02 | 5.6749  |
| BNC2          | 4.1440  | 1.9349 | 11.7063 | 6.23E-04 | 1.32E-02 | 17.6797 |
| RP11-582J16.4 | 3.3372  | 1.2219 | 11.7009 | 6.25E-04 | 1.32E-02 | 10.1062 |
| AC013474.4    | 3.1557  | 0.6482 | 11.6868 | 6.29E-04 | 1.33E-02 | 8.9116  |
| AL157830.1    | 3.6542  | 0.9717 | 11.6810 | 6.31E-04 | 1.33E-02 | 12.5900 |
| IL3RA         | 4.2282  | 2.3960 | 11.6792 | 6.32E-04 | 1.33E-02 | 18.7418 |
| GRIA2         | 2.8865  | 0.8615 | 11.6682 | 6.36E-04 | 1.33E-02 | 7.3945  |
| STARD7-AS1    | 4.2319  | 0.9873 | 11.6678 | 6.36E-04 | 1.33E-02 | 18.7904 |
| USP21         | -2.8656 | 0.7003 | 11.6643 | 6.37E-04 | 1.33E-02 | 0.1372  |
| UNC13A        | 3.5295  | 1.2119 | 11.6593 | 6.39E-04 | 1.33E-02 | 11.5472 |
| DRAXIN        | 2.8258  | 0.8533 | 11.6422 | 6.45E-04 | 1.34E-02 | 7.0899  |
| QTRTD1        | 3.3756  | 0.8808 | 11.6366 | 6.47E-04 | 1.34E-02 | 10.3789 |
| KIAA1841*     | 3.7687  | 2.3484 | 11.6193 | 6.53E-04 | 1.34E-02 | 13.6302 |
| C12orf29      | 4.2955  | 1.2797 | 11.6248 | 6.51E-04 | 1.34E-02 | 19.6367 |
| PLA2G4F       | -4.3029 | 1.0222 | 11.6194 | 6.53E-04 | 1.34E-02 | 0.0507  |
| GNG7          | 3.0150  | 1.3037 | 11.6185 | 6.53E-04 | 1.34E-02 | 8.0835  |
| NFATC2IP      | 2.4957  | 2.4415 | 11.6118 | 6.55E-04 | 1.34E-02 | 5.6401  |
| MAP1S         | 2.2518  | 0.6976 | 11.6103 | 6.56E-04 | 1.34E-02 | 4.7627  |
| BICD1         | 3.0557  | 0.6712 | 11.6101 | 6.56E-04 | 1.34E-02 | 8.3149  |
| GAL3ST1       | 2.4327  | 0.6102 | 11.6015 | 6.59E-04 | 1.35E-02 | 5.3990  |
| NIPBL         | -3.5109 | 2.6029 | 11.5922 | 6.62E-04 | 1.35E-02 | 0.0877  |
| LINC01397     | 3.9606  | 1.1804 | 11.5901 | 6.63E-04 | 1.35E-02 | 15.5689 |
| LDB2          | 3.0223  | 0.7481 | 11.5866 | 6.64E-04 | 1.35E-02 | 8.1247  |

|               |         |        |         |          |          |         |
|---------------|---------|--------|---------|----------|----------|---------|
| KRT16         | 3.7243  | 3.8152 | 11.5735 | 6.69E-04 | 1.36E-02 | 13.2171 |
| CLDN3         | -2.1421 | 4.0928 | 11.5557 | 6.75E-04 | 1.37E-02 | 0.2265  |
| CDH8          | 3.8257  | 2.2997 | 11.5535 | 6.76E-04 | 1.37E-02 | 14.1796 |
| KRT12         | -3.3570 | 0.6925 | 11.5465 | 6.79E-04 | 1.37E-02 | 0.0976  |
| DENND4B       | -3.6898 | 1.5495 | 11.5421 | 6.80E-04 | 1.37E-02 | 0.0775  |
| SMCR5         | 4.3010  | 0.9929 | 11.5405 | 6.81E-04 | 1.37E-02 | 19.7122 |
| MEF2BNB       | 4.3620  | 2.4174 | 11.5390 | 6.82E-04 | 1.37E-02 | 20.5633 |
| ERN1          | 3.2143  | 2.5311 | 11.5240 | 6.87E-04 | 1.38E-02 | 9.2811  |
| PCYT1B        | 2.9658  | 0.8317 | 11.4920 | 6.99E-04 | 1.40E-02 | 7.8124  |
| RP11-575F12.3 | 3.2972  | 0.7502 | 11.4834 | 7.02E-04 | 1.40E-02 | 9.8299  |
| CCDC34        | 3.3132  | 0.9865 | 11.4719 | 7.07E-04 | 1.41E-02 | 9.9395  |
| SEPT4         | 4.6508  | 1.5930 | 11.4693 | 7.08E-04 | 1.41E-02 | 25.1210 |
| RNU2-8P       | 3.6412  | 1.4505 | 11.4661 | 7.09E-04 | 1.41E-02 | 12.4771 |
| LURAP1        | 4.0445  | 0.9105 | 11.4366 | 7.20E-04 | 1.43E-02 | 16.5018 |
| THADA         | 2.5099  | 0.9114 | 11.4354 | 7.21E-04 | 1.43E-02 | 5.6956  |
| DTWD1         | 3.8895  | 1.9900 | 11.4300 | 7.23E-04 | 1.43E-02 | 14.8207 |
| RFT1          | 4.4158  | 1.2803 | 11.3987 | 7.35E-04 | 1.45E-02 | 21.3447 |
| OMA1          | 3.3974  | 1.2053 | 11.3980 | 7.35E-04 | 1.45E-02 | 10.5373 |
| EVA1A         | 2.9975  | 0.8331 | 11.3968 | 7.36E-04 | 1.45E-02 | 7.9860  |
| WDR61         | 2.9645  | 1.1367 | 11.3925 | 7.37E-04 | 1.45E-02 | 7.8057  |
| SLC8A3        | 2.6546  | 0.7233 | 11.3888 | 7.39E-04 | 1.45E-02 | 6.2966  |
| EBLN2         | 3.1322  | 0.7353 | 11.3865 | 7.40E-04 | 1.45E-02 | 8.7674  |
| ZBTB48        | -4.0396 | 2.1553 | 11.3818 | 7.42E-04 | 1.45E-02 | 0.0608  |
| RP11-296C13.1 | 3.8488  | 2.5166 | 11.3768 | 7.44E-04 | 1.45E-02 | 14.4076 |
| FCGR3A        | -3.6675 | 1.0153 | 11.3660 | 7.48E-04 | 1.46E-02 | 0.0787  |
| DRAM1         | 3.1997  | 2.2130 | 11.3626 | 7.49E-04 | 1.46E-02 | 9.1877  |
| PLA2G10       | -2.2027 | 5.2349 | 11.3480 | 7.55E-04 | 1.47E-02 | 0.2172  |
| ALPK2         | 3.6441  | 1.0068 | 11.3399 | 7.59E-04 | 1.47E-02 | 12.5019 |
| RORB          | 2.1853  | 0.6300 | 11.3377 | 7.59E-04 | 1.47E-02 | 4.5481  |
| ZNF532        | 5.3392  | 2.1222 | 11.3362 | 7.60E-04 | 1.47E-02 | 40.4819 |
| ITK           | 3.7990  | 1.1818 | 11.3324 | 7.62E-04 | 1.47E-02 | 13.9188 |
| IGF2BP1       | 3.8970  | 1.7486 | 11.3217 | 7.66E-04 | 1.48E-02 | 14.8973 |
| SHMT2         | -4.3671 | 1.3519 | 11.3141 | 7.69E-04 | 1.48E-02 | 0.0485  |
| RP11-489E7.1  | 3.8132  | 1.2944 | 11.2937 | 7.78E-04 | 1.49E-02 | 14.0565 |
| PPIE          | 3.0863  | 1.7886 | 11.2906 | 7.79E-04 | 1.49E-02 | 8.4929  |
| RP11-531A24.5 | 3.2890  | 1.0066 | 11.2823 | 7.83E-04 | 1.49E-02 | 9.7744  |
| CACNA1E       | 3.6921  | 2.1039 | 11.2806 | 7.83E-04 | 1.49E-02 | 12.9252 |
| ST8SIA1       | 2.6779  | 0.9039 | 11.2798 | 7.84E-04 | 1.49E-02 | 6.3991  |
| RP1-228P16.4  | 3.4527  | 0.7536 | 11.2778 | 7.84E-04 | 1.49E-02 | 10.9491 |
| LY75          | 3.8621  | 2.8281 | 11.2752 | 7.86E-04 | 1.49E-02 | 14.5419 |
| NPM1          | -2.5381 | 4.9533 | 11.2748 | 7.86E-04 | 1.49E-02 | 0.1722  |

|               |         |        |         |          |          |          |
|---------------|---------|--------|---------|----------|----------|----------|
| P2RY14        | 5.4128  | 1.6135 | 11.2332 | 8.03E-04 | 1.52E-02 | 42.6009  |
| SULT1A2       | -2.4070 | 3.1840 | 11.2182 | 8.10E-04 | 1.53E-02 | 0.1885   |
| PEG3          | 3.3877  | 0.8540 | 11.2139 | 8.12E-04 | 1.53E-02 | 10.4661  |
| RP1-102H19.8  | 3.3905  | 1.1421 | 11.2119 | 8.13E-04 | 1.53E-02 | 10.4869  |
| CSF1          | 3.1710  | 1.0560 | 11.2100 | 8.14E-04 | 1.53E-02 | 9.0068   |
| SMG7-AS1      | 3.7385  | 1.0516 | 11.2014 | 8.17E-04 | 1.53E-02 | 13.3472  |
| MIB2          | 2.5007  | 1.0975 | 11.1958 | 8.20E-04 | 1.53E-02 | 5.6595   |
| WDR7          | 2.8396  | 0.7823 | 11.1952 | 8.20E-04 | 1.53E-02 | 7.1584   |
| CAPN10        | 3.6868  | 1.1391 | 11.1932 | 8.21E-04 | 1.53E-02 | 12.8781  |
| AADAC         | -2.5713 | 5.5659 | 11.1931 | 8.21E-04 | 1.53E-02 | 0.1683   |
| C12orf66      | 2.7906  | 0.9816 | 11.1787 | 8.27E-04 | 1.54E-02 | 6.9191   |
| CRIM1         | -1.9755 | 5.4781 | 11.1784 | 8.28E-04 | 1.54E-02 | 0.2543   |
| RP11-321E2.13 | 8.2761  | 7.1961 | 11.1782 | 8.28E-04 | 1.54E-02 | 309.9852 |
| SRCIN1        | 3.8418  | 1.3970 | 11.1734 | 8.30E-04 | 1.54E-02 | 14.3387  |
| SLC30A9       | 3.5679  | 4.6432 | 11.1719 | 8.30E-04 | 1.54E-02 | 11.8593  |
| HIST1H4E      | 7.1562  | 2.5209 | 11.1671 | 8.33E-04 | 1.54E-02 | 142.6366 |
| FAM49A        | 3.5660  | 2.1831 | 11.1534 | 8.39E-04 | 1.55E-02 | 11.8437  |
| IQUB          | 3.3863  | 0.8357 | 11.1503 | 8.40E-04 | 1.55E-02 | 10.4565  |
| FAM57B        | 2.3185  | 0.8426 | 11.1502 | 8.40E-04 | 1.55E-02 | 4.9880   |
| XBP1          | -2.6177 | 3.2574 | 11.1466 | 8.42E-04 | 1.55E-02 | 0.1629   |
| SMPD4P1       | 2.8629  | 0.6528 | 11.1451 | 8.43E-04 | 1.55E-02 | 7.2745   |
| FUT2          | -2.9232 | 3.7845 | 11.1312 | 8.49E-04 | 1.55E-02 | 0.1318   |
| FAM83H-AS1    | 3.0611  | 0.9012 | 11.1297 | 8.50E-04 | 1.55E-02 | 8.3461   |
| ZNF682        | 3.0704  | 0.8977 | 11.1240 | 8.52E-04 | 1.55E-02 | 8.4002   |
| RGS7          | 4.6616  | 2.3376 | 11.1219 | 8.53E-04 | 1.55E-02 | 25.3099  |
| C19orf25      | 2.6879  | 1.2795 | 11.1218 | 8.53E-04 | 1.55E-02 | 6.4436   |
| PPP2R2B       | 2.1707  | 0.5891 | 11.1165 | 8.56E-04 | 1.55E-02 | 4.5025   |
| AUH           | -2.7602 | 1.8621 | 11.1135 | 8.57E-04 | 1.55E-02 | 0.1476   |
| APOPT1        | 3.8628  | 1.8738 | 11.1105 | 8.58E-04 | 1.55E-02 | 14.5482  |
| LMO7DN        | 2.9798  | 1.3436 | 11.0996 | 8.63E-04 | 1.56E-02 | 7.8886   |
| YIPF6         | -2.6139 | 6.3881 | 11.0992 | 8.64E-04 | 1.56E-02 | 0.1634   |
| TNPO2         | -2.0277 | 5.1474 | 11.0908 | 8.68E-04 | 1.56E-02 | 0.2452   |
| RP11-281N10.1 | 2.9120  | 1.0364 | 11.0868 | 8.69E-04 | 1.57E-02 | 7.5266   |
| STEAP4        | 2.7726  | 2.7797 | 11.0781 | 8.74E-04 | 1.57E-02 | 6.8336   |
| SEC22C        | 3.7558  | 1.5846 | 11.0762 | 8.74E-04 | 1.57E-02 | 13.5090  |
| MRPL46        | 3.9448  | 1.0669 | 11.0639 | 8.80E-04 | 1.57E-02 | 15.3992  |
| TLL2          | 3.6663  | 0.8385 | 11.0630 | 8.81E-04 | 1.57E-02 | 12.6956  |
| RTKN2         | 2.6679  | 1.1054 | 11.0616 | 8.81E-04 | 1.57E-02 | 6.3550   |
| AC007386.2    | 3.3068  | 1.2810 | 11.0607 | 8.82E-04 | 1.57E-02 | 9.8955   |
| CCDC180       | 2.2255  | 0.5885 | 11.0450 | 8.89E-04 | 1.58E-02 | 4.6766   |
| ZNF618        | 3.4187  | 1.4384 | 11.0380 | 8.93E-04 | 1.59E-02 | 10.6936  |



|               |         |        |         |          |          |         |
|---------------|---------|--------|---------|----------|----------|---------|
| STARD7        | -2.6780 | 5.5533 | 11.0364 | 8.93E-04 | 1.59E-02 | 0.1563  |
| CDH24         | 2.2204  | 0.5860 | 11.0316 | 8.96E-04 | 1.59E-02 | 4.6601  |
| GPR155        | 4.0019  | 1.3865 | 11.0263 | 8.98E-04 | 1.59E-02 | 16.0211 |
| DNAL1         | 3.7289  | 3.8515 | 11.0250 | 8.99E-04 | 1.59E-02 | 13.2586 |
| RP11-84A19.2  | 4.5571  | 3.0823 | 11.0201 | 9.01E-04 | 1.59E-02 | 23.5404 |
| SCPEP1        | 4.0406  | 1.3843 | 11.0190 | 9.02E-04 | 1.59E-02 | 16.4571 |
| CDH4          | 3.2881  | 3.1573 | 11.0173 | 9.03E-04 | 1.59E-02 | 9.7685  |
| GPANK1        | 3.5111  | 1.6957 | 11.0084 | 9.07E-04 | 1.59E-02 | 11.4013 |
| ABCA13        | 4.2453  | 1.4061 | 11.0034 | 9.09E-04 | 1.59E-02 | 18.9655 |
| KLF16         | -3.2769 | 1.0579 | 11.0021 | 9.10E-04 | 1.59E-02 | 0.1032  |
| CTD-2319I12.9 | 2.3569  | 0.7986 | 10.9874 | 9.17E-04 | 1.60E-02 | 5.1227  |
| RP11-725D20.1 | 2.5091  | 0.8575 | 10.9810 | 9.21E-04 | 1.61E-02 | 5.6926  |
| TNFRSF12A     | -3.6718 | 2.9384 | 10.9798 | 9.21E-04 | 1.61E-02 | 0.0785  |
| CD160         | 2.7049  | 0.6945 | 10.9554 | 9.33E-04 | 1.61E-02 | 6.5202  |
| FAM47E        | -3.4083 | 0.8970 | 10.9543 | 9.34E-04 | 1.61E-02 | 0.0942  |
| RP11-282K24.3 | 2.7559  | 1.1385 | 10.9531 | 9.34E-04 | 1.61E-02 | 6.7547  |
| NLRP8         | 2.9578  | 1.0152 | 10.9520 | 9.35E-04 | 1.61E-02 | 7.7695  |
| TTC31         | -4.4628 | 1.1881 | 10.9501 | 9.36E-04 | 1.61E-02 | 0.0453  |
| DNPH1         | -3.5507 | 1.0777 | 10.9495 | 9.36E-04 | 1.61E-02 | 0.0853  |
| SLC16A12      | 2.8378  | 0.7619 | 10.9469 | 9.38E-04 | 1.61E-02 | 7.1491  |
| ZNF331        | 4.7478  | 2.7981 | 10.9466 | 9.38E-04 | 1.61E-02 | 26.8678 |
| DNAH12        | 2.2847  | 0.6929 | 10.9439 | 9.39E-04 | 1.61E-02 | 4.8725  |
| CHST9         | 4.1454  | 1.9461 | 10.9418 | 9.40E-04 | 1.61E-02 | 17.6963 |
| FBXO27        | 3.7144  | 1.0609 | 10.9414 | 9.40E-04 | 1.61E-02 | 13.1261 |
| SUPT20H       | 3.8903  | 1.6395 | 10.9414 | 9.40E-04 | 1.61E-02 | 14.8280 |
| STXBP6        | -3.0587 | 4.8187 | 10.9412 | 9.40E-04 | 1.61E-02 | 0.1200  |
| RP11-295P9.8  | 5.3275  | 2.5972 | 10.9225 | 9.50E-04 | 1.62E-02 | 40.1551 |
| LSM14B        | -3.2694 | 3.4932 | 10.9189 | 9.52E-04 | 1.62E-02 | 0.1037  |
| ZNF143        | -3.3022 | 1.5226 | 10.9180 | 9.52E-04 | 1.62E-02 | 0.1014  |
| NFRKB         | 3.5683  | 1.7086 | 10.9168 | 9.53E-04 | 1.62E-02 | 11.8620 |
| SPATA18       | 3.4307  | 0.9340 | 10.9133 | 9.55E-04 | 1.62E-02 | 10.7833 |
| TSC22D3       | 4.2050  | 6.3895 | 10.9078 | 9.58E-04 | 1.62E-02 | 18.4425 |
| KIAA0586      | 2.9549  | 4.1320 | 10.9014 | 9.61E-04 | 1.63E-02 | 7.7536  |
| APOL1         | 2.8295  | 2.9805 | 10.8860 | 9.69E-04 | 1.64E-02 | 7.1084  |
| SLC38A6       | 2.3855  | 0.6273 | 10.8821 | 9.71E-04 | 1.64E-02 | 5.2253  |
| KLF17         | 2.5282  | 0.7797 | 10.8676 | 9.79E-04 | 1.65E-02 | 5.7685  |
| SERPINB3      | 3.2380  | 1.0968 | 10.8589 | 9.83E-04 | 1.65E-02 | 9.4346  |
| ITGA2         | 3.2126  | 3.4311 | 10.8488 | 9.89E-04 | 1.66E-02 | 9.2704  |
| USP30         | 2.9949  | 0.9390 | 10.8483 | 9.89E-04 | 1.66E-02 | 7.9717  |
| RP11-383C5.3  | 3.6716  | 0.8482 | 10.8450 | 9.91E-04 | 1.66E-02 | 12.7430 |
| IFT22         | 3.3403  | 0.9733 | 10.8427 | 9.92E-04 | 1.66E-02 | 10.1281 |

|               |         |        |         |          |          |         |
|---------------|---------|--------|---------|----------|----------|---------|
| LINC00661     | 3.6589  | 1.0329 | 10.8415 | 9.93E-04 | 1.66E-02 | 12.6308 |
| MICB          | 3.9845  | 1.6232 | 10.8398 | 9.93E-04 | 1.66E-02 | 15.8289 |
| ASXL3         | 3.7382  | 1.3336 | 10.8287 | 9.99E-04 | 1.66E-02 | 13.3451 |
| RP11-348N5.7  | -3.0201 | 0.7022 | 10.8241 | 1.00E-03 | 1.67E-02 | 0.1233  |
| TIA1          | 3.2550  | 2.3254 | 10.8207 | 1.00E-03 | 1.67E-02 | 9.5468  |
| RP11-100M12.2 | 3.7631  | 0.9104 | 10.8130 | 1.01E-03 | 1.67E-02 | 13.5774 |
| CXXC4         | 3.4263  | 1.4656 | 10.8045 | 1.01E-03 | 1.68E-02 | 10.7503 |
| GPR133        | 2.9070  | 0.7440 | 10.8034 | 1.01E-03 | 1.68E-02 | 7.5008  |
| DNAH2         | 2.8506  | 1.0288 | 10.7988 | 1.02E-03 | 1.68E-02 | 7.2128  |
| DNAJC27*      | 4.0690  | 1.3558 | 10.7707 | 1.03E-03 | 1.70E-02 | 16.7834 |
| PKHD1L1       | 2.8877  | 0.7502 | 10.7731 | 1.03E-03 | 1.70E-02 | 7.4011  |
| ADRA2A        | 2.4591  | 0.8503 | 10.7618 | 1.04E-03 | 1.70E-02 | 5.4988  |
| MAP1B         | 3.7953  | 1.1801 | 10.7583 | 1.04E-03 | 1.70E-02 | 13.8839 |
| RP11-524C21.2 | 4.3318  | 1.7532 | 10.7580 | 1.04E-03 | 1.70E-02 | 20.1369 |
| CDCP1         | 2.2953  | 4.2638 | 10.7518 | 1.04E-03 | 1.70E-02 | 4.9085  |
| KSR2          | 3.2425  | 1.5440 | 10.7495 | 1.04E-03 | 1.70E-02 | 9.4645  |
| YTHDC2        | 4.3654  | 3.4130 | 10.7494 | 1.04E-03 | 1.70E-02 | 20.6115 |
| ZMYM4         | 2.4974  | 3.2293 | 10.7492 | 1.04E-03 | 1.70E-02 | 5.6468  |
| MIR3663HG     | 3.5336  | 0.8534 | 10.7479 | 1.04E-03 | 1.70E-02 | 11.5807 |
| TRAM1         | -2.1040 | 5.6799 | 10.7446 | 1.05E-03 | 1.70E-02 | 0.2326  |
| FER           | 4.5648  | 2.6149 | 10.7445 | 1.05E-03 | 1.70E-02 | 23.6668 |
| SETBP1        | 4.1663  | 1.9555 | 10.7410 | 1.05E-03 | 1.70E-02 | 17.9545 |
| USP17L7       | 3.7581  | 1.3313 | 10.7368 | 1.05E-03 | 1.70E-02 | 13.5297 |
| RP11-327F22.1 | 3.6116  | 1.5805 | 10.7333 | 1.05E-03 | 1.70E-02 | 12.2236 |
| ANKRD55       | 2.9807  | 1.7670 | 10.7299 | 1.05E-03 | 1.70E-02 | 7.8939  |
| CTB-89H12.4   | -4.0359 | 1.2919 | 10.7292 | 1.05E-03 | 1.70E-02 | 0.0610  |
| CEP19         | 3.4690  | 1.4176 | 10.7212 | 1.06E-03 | 1.70E-02 | 11.0730 |
| DNAJB5P1      | 2.7566  | 1.1850 | 10.7195 | 1.06E-03 | 1.70E-02 | 6.7580  |
| CCDC83        | 2.9175  | 1.3929 | 10.7063 | 1.07E-03 | 1.71E-02 | 7.5555  |
| TBC1D8B       | 2.7572  | 0.9482 | 10.7039 | 1.07E-03 | 1.71E-02 | 6.7606  |
| COL16A1       | 2.9707  | 1.4131 | 10.6924 | 1.08E-03 | 1.72E-02 | 7.8392  |
| GRK5          | 3.3009  | 0.9582 | 10.6902 | 1.08E-03 | 1.72E-02 | 9.8554  |
| ERCC6         | 2.9247  | 1.0619 | 10.6807 | 1.08E-03 | 1.73E-02 | 7.5930  |
| LUC7L3        | -2.3607 | 4.7329 | 10.6685 | 1.09E-03 | 1.74E-02 | 0.1947  |
| HS6ST3        | 2.6590  | 0.6846 | 10.6675 | 1.09E-03 | 1.74E-02 | 6.3158  |
| PDPR          | 3.2761  | 1.5626 | 10.6647 | 1.09E-03 | 1.74E-02 | 9.6871  |
| UNC5CL        | -4.1026 | 4.5571 | 10.6626 | 1.09E-03 | 1.74E-02 | 0.0582  |
| ARHGAP20      | 2.8614  | 0.7525 | 10.6606 | 1.09E-03 | 1.74E-02 | 7.2674  |
| HOXA10-AS     | 3.3779  | 0.8855 | 10.6491 | 1.10E-03 | 1.74E-02 | 10.3953 |
| CSF2RB        | 2.8484  | 3.1031 | 10.6288 | 1.11E-03 | 1.76E-02 | 7.2021  |
| KIAA1324      | -2.8755 | 3.0435 | 10.6229 | 1.12E-03 | 1.76E-02 | 0.1363  |

|               |         |        |         |          |          |         |
|---------------|---------|--------|---------|----------|----------|---------|
| LAMA3         | -2.0832 | 4.0789 | 10.6215 | 1.12E-03 | 1.76E-02 | 0.2360  |
| ZCCHC17       | -4.0126 | 1.8582 | 10.5912 | 1.14E-03 | 1.79E-02 | 0.0620  |
| TMEM60        | -3.1758 | 1.8129 | 10.5882 | 1.14E-03 | 1.79E-02 | 0.1107  |
| MDM1          | 3.6367  | 1.0429 | 10.5822 | 1.14E-03 | 1.79E-02 | 12.4383 |
| IL1R1         | 5.1771  | 3.0658 | 10.5806 | 1.14E-03 | 1.79E-02 | 36.1787 |
| KDM1B         | -2.5604 | 4.0721 | 10.5797 | 1.14E-03 | 1.79E-02 | 0.1695  |
| CLCA2         | 2.2971  | 0.5845 | 10.5747 | 1.15E-03 | 1.79E-02 | 4.9147  |
| FOPNL         | 3.3552  | 1.8203 | 10.5733 | 1.15E-03 | 1.79E-02 | 10.2330 |
| RNU6-47P      | 2.0512  | 0.6072 | 10.5616 | 1.15E-03 | 1.80E-02 | 4.1444  |
| SIAH3*        | 2.8892  | 0.9506 | 10.5461 | 1.16E-03 | 1.81E-02 | 7.4088  |
| TRHDE         | 3.6056  | 2.8987 | 10.5461 | 1.16E-03 | 1.81E-02 | 12.1728 |
| C14orf1       | -2.9883 | 3.2433 | 10.5397 | 1.17E-03 | 1.81E-02 | 0.1260  |
| SNORA7        | 2.5110  | 2.9595 | 10.5397 | 1.17E-03 | 1.81E-02 | 5.7002  |
| RP11-259A24.1 | 3.3133  | 1.5661 | 10.5388 | 1.17E-03 | 1.81E-02 | 9.9401  |
| TRAPPC10      | 3.5252  | 1.8278 | 10.5346 | 1.17E-03 | 1.81E-02 | 11.5127 |
| MCF2L2        | 4.2538  | 3.8450 | 10.5292 | 1.18E-03 | 1.82E-02 | 19.0773 |
| LINC01249     | 3.7864  | 1.2560 | 10.5227 | 1.18E-03 | 1.82E-02 | 13.7980 |
| ANKRD18EP     | 3.3788  | 0.7228 | 10.5138 | 1.18E-03 | 1.82E-02 | 10.4018 |
| RAB34         | 4.4463  | 3.2016 | 10.5136 | 1.19E-03 | 1.82E-02 | 21.7999 |
| JADE3         | 3.4075  | 1.3937 | 10.4983 | 1.19E-03 | 1.83E-02 | 10.6108 |
| KIF13B        | 3.7845  | 2.0437 | 10.4980 | 1.20E-03 | 1.83E-02 | 13.7798 |
| IL17RE        | 2.7089  | 0.7978 | 10.4933 | 1.20E-03 | 1.83E-02 | 6.5384  |
| SYT11         | 2.1365  | 0.5906 | 10.4931 | 1.20E-03 | 1.83E-02 | 4.3969  |
| G6PC3         | 4.2251  | 1.1871 | 10.4924 | 1.20E-03 | 1.83E-02 | 18.7013 |
| KIAA1407      | 2.2822  | 0.6970 | 10.4923 | 1.20E-03 | 1.83E-02 | 4.8641  |
| STARD10       | 2.7753  | 3.4690 | 10.4881 | 1.20E-03 | 1.83E-02 | 6.8462  |
| RP11-624C23.1 | 2.5986  | 0.6733 | 10.4877 | 1.20E-03 | 1.83E-02 | 6.0568  |
| RP11-126O22.1 | 6.3546  | 5.3399 | 10.4734 | 1.21E-03 | 1.84E-02 | 81.8314 |
| GLT8D2        | 3.2412  | 0.8091 | 10.4724 | 1.21E-03 | 1.84E-02 | 9.4558  |
| PAK3          | 3.2704  | 2.0575 | 10.4684 | 1.21E-03 | 1.84E-02 | 9.6489  |
| ZNF585B       | -2.8544 | 3.3048 | 10.4682 | 1.21E-03 | 1.84E-02 | 0.1383  |
| RP11-354E11.2 | 3.2541  | 0.9942 | 10.4644 | 1.22E-03 | 1.84E-02 | 9.5407  |
| GDPD3         | -3.0180 | 3.0010 | 10.4603 | 1.22E-03 | 1.84E-02 | 0.1235  |
| SRRM3         | 3.3118  | 1.2864 | 10.4582 | 1.22E-03 | 1.84E-02 | 9.9302  |
| KCNN3         | 2.1413  | 0.6931 | 10.4546 | 1.22E-03 | 1.84E-02 | 4.4116  |
| REL           | 3.1550  | 1.6275 | 10.4529 | 1.22E-03 | 1.84E-02 | 8.9075  |
| ACAP1         | 2.6259  | 0.9137 | 10.4501 | 1.23E-03 | 1.84E-02 | 6.1727  |
| MCM8          | 2.0858  | 0.5805 | 10.4458 | 1.23E-03 | 1.84E-02 | 4.2452  |
| NRBP1         | 3.9228  | 1.6968 | 10.4448 | 1.23E-03 | 1.84E-02 | 15.1667 |
| LANCL1        | 2.4090  | 0.8286 | 10.4278 | 1.24E-03 | 1.86E-02 | 5.3112  |
| ATP2C1        | 2.6553  | 5.6323 | 10.4254 | 1.24E-03 | 1.86E-02 | 6.2997  |

|                |         |         |         |          |          |         |
|----------------|---------|---------|---------|----------|----------|---------|
| RP11-379C10.1  | 3.9685  | 0.8481  | 10.4227 | 1.24E-03 | 1.86E-02 | 15.6547 |
| SCUBE1         | 2.6990  | 2.9677  | 10.4213 | 1.25E-03 | 1.86E-02 | 6.4935  |
| NEURL3         | -3.5325 | 1.2356  | 10.4188 | 1.25E-03 | 1.86E-02 | 0.0864  |
| RP5-973N23.4   | 2.7260  | 0.8919  | 10.4166 | 1.25E-03 | 1.86E-02 | 6.6162  |
| AC002472.13    | 3.5857  | 1.4664  | 10.4125 | 1.25E-03 | 1.86E-02 | 12.0064 |
| EXOC6B         | -2.5131 | 4.3657  | 10.3986 | 1.26E-03 | 1.87E-02 | 0.1752  |
| G0S2           | 2.4872  | 12.2245 | 10.3931 | 1.26E-03 | 1.87E-02 | 5.6068  |
| DAPP1          | 3.3461  | 2.0479  | 10.3818 | 1.27E-03 | 1.88E-02 | 10.1690 |
| ALPK1          | 3.6475  | 3.8554  | 10.3800 | 1.27E-03 | 1.88E-02 | 12.5317 |
| ATP8B4         | 4.0897  | 1.2221  | 10.3726 | 1.28E-03 | 1.89E-02 | 17.0262 |
| ZNF419         | 2.6611  | 0.8667  | 10.3477 | 1.30E-03 | 1.91E-02 | 6.3254  |
| TOM1           | -2.7188 | 2.4197  | 10.3441 | 1.30E-03 | 1.91E-02 | 0.1519  |
| PKD1L2         | 2.9756  | 1.7427  | 10.3314 | 1.31E-03 | 1.92E-02 | 7.8660  |
| CPEB1          | 2.7881  | 5.8307  | 10.3207 | 1.32E-03 | 1.93E-02 | 6.9070  |
| CDK2           | -2.9380 | 4.1222  | 10.3202 | 1.32E-03 | 1.93E-02 | 0.1305  |
| ZNF583         | 2.0716  | 0.5637  | 10.3051 | 1.33E-03 | 1.94E-02 | 4.2036  |
| ICAM1          | 3.3784  | 1.1668  | 10.3003 | 1.33E-03 | 1.94E-02 | 10.3991 |
| WNT3           | 2.9210  | 0.9250  | 10.2990 | 1.33E-03 | 1.94E-02 | 7.5738  |
| KIF6           | 3.5074  | 0.9991  | 10.2945 | 1.33E-03 | 1.95E-02 | 11.3721 |
| ABHD10         | -3.8113 | 1.6501  | 10.2806 | 1.34E-03 | 1.96E-02 | 0.0712  |
| MED12          | -3.4612 | 1.6272  | 10.2778 | 1.35E-03 | 1.96E-02 | 0.0908  |
| VNN1           | -2.7797 | 2.9481  | 10.2717 | 1.35E-03 | 1.96E-02 | 0.1456  |
| RP11-529E10.7  | 3.3427  | 3.2622  | 10.2655 | 1.36E-03 | 1.97E-02 | 10.1452 |
| LRRTM4         | 3.8366  | 0.9219  | 10.2651 | 1.36E-03 | 1.97E-02 | 14.2868 |
| MTFMT          | -4.2879 | 3.7937  | 10.2486 | 1.37E-03 | 1.98E-02 | 0.0512  |
| RP11-1060J15.5 | -2.7019 | 0.6381  | 10.2476 | 1.37E-03 | 1.98E-02 | 0.1537  |
| CHMP2A         | -2.2902 | 2.9442  | 10.2449 | 1.37E-03 | 1.98E-02 | 0.2044  |
| CSF2RA         | 3.9919  | 2.0606  | 10.2424 | 1.37E-03 | 1.98E-02 | 15.9104 |
| CTD-2015H6.2   | 4.6033  | 0.9006  | 10.2394 | 1.37E-03 | 1.98E-02 | 24.3075 |
| C12orf55       | 3.4415  | 1.1286  | 10.2380 | 1.38E-03 | 1.98E-02 | 10.8641 |
| RP11-304C12.4  | 2.1572  | 0.6454  | 10.2359 | 1.38E-03 | 1.98E-02 | 4.4605  |
| RP3-468B3.2    | 3.3635  | 1.2346  | 10.2299 | 1.38E-03 | 1.98E-02 | 10.2925 |
| CHRD1          | 3.8012  | 1.2710  | 10.2287 | 1.38E-03 | 1.98E-02 | 13.9407 |
| MLLT3          | 1.9221  | 9.1818  | 10.2164 | 1.39E-03 | 1.99E-02 | 3.7898  |
| GALNT11        | 2.1786  | 0.8076  | 10.2153 | 1.39E-03 | 1.99E-02 | 4.5272  |
| ZDHHC21        | -2.6831 | 4.6131  | 10.2000 | 1.40E-03 | 2.01E-02 | 0.1557  |
| CTD-2246P4.1   | 2.5643  | 0.8289  | 10.1897 | 1.41E-03 | 2.01E-02 | 5.9149  |
| MEMO1          | 3.4485  | 2.8858  | 10.1862 | 1.41E-03 | 2.02E-02 | 10.9169 |
| HDAC6          | 3.3320  | 1.0830  | 10.1803 | 1.42E-03 | 2.02E-02 | 10.0701 |
| ATM            | 3.9103  | 1.5461  | 10.1756 | 1.42E-03 | 2.02E-02 | 15.0356 |
| SPATA6         | 3.0989  | 1.0807  | 10.1724 | 1.43E-03 | 2.02E-02 | 8.5677  |

|               |         |        |         |          |          |         |
|---------------|---------|--------|---------|----------|----------|---------|
| USP36         | 3.1442  | 1.1827 | 10.1683 | 1.43E-03 | 2.03E-02 | 8.8407  |
| AP2A2         | 2.7901  | 0.8526 | 10.1630 | 1.43E-03 | 2.03E-02 | 6.9169  |
| ATRNL1        | 2.6772  | 0.7746 | 10.1610 | 1.43E-03 | 2.03E-02 | 6.3962  |
| BPHL          | 3.2395  | 1.1091 | 10.1605 | 1.43E-03 | 2.03E-02 | 9.4447  |
| RP11-638I2.2  | 4.0375  | 1.0428 | 10.1575 | 1.44E-03 | 2.03E-02 | 16.4213 |
| RP11-355F16.1 | 3.0573  | 1.0991 | 10.1543 | 1.44E-03 | 2.03E-02 | 8.3243  |
| AP5B1         | -3.2999 | 4.8663 | 10.1481 | 1.44E-03 | 2.03E-02 | 0.1015  |
| AC114763.1    | 4.3997  | 1.4979 | 10.1288 | 1.46E-03 | 2.05E-02 | 21.1074 |
| CAST          | 2.0482  | 8.9736 | 10.1155 | 1.47E-03 | 2.06E-02 | 4.1358  |
| NR2F2-AS1     | 3.0182  | 1.3096 | 10.1149 | 1.47E-03 | 2.06E-02 | 8.1014  |
| MORC3         | 3.1848  | 5.8636 | 10.1136 | 1.47E-03 | 2.06E-02 | 9.0931  |
| MIR490        | 3.2274  | 1.1281 | 10.1049 | 1.48E-03 | 2.07E-02 | 9.3657  |
| RP11-122M14.1 | 2.7168  | 1.0280 | 10.1003 | 1.48E-03 | 2.07E-02 | 6.5740  |
| EIF4H         | -2.5122 | 1.2888 | 10.0970 | 1.49E-03 | 2.07E-02 | 0.1753  |
| CAMKK2        | 2.2959  | 2.3527 | 10.0888 | 1.49E-03 | 2.08E-02 | 4.9105  |
| RPGR*         | 4.1902  | 3.0035 | 10.0726 | 1.50E-03 | 2.09E-02 | 18.2550 |
| THYN1         | 4.1809  | 2.9713 | 10.0788 | 1.50E-03 | 2.09E-02 | 18.1374 |
| TRAPPC3L      | 3.6151  | 0.9601 | 10.0712 | 1.51E-03 | 2.09E-02 | 12.2531 |
| ZBTB8B        | 2.6727  | 1.3151 | 10.0687 | 1.51E-03 | 2.09E-02 | 6.3761  |
| RP11-526H11.1 | 4.3387  | 0.8592 | 10.0684 | 1.51E-03 | 2.09E-02 | 20.2343 |
| JAM2          | 2.0627  | 0.5681 | 10.0656 | 1.51E-03 | 2.09E-02 | 4.1777  |
| RP11-422J15.1 | 3.1108  | 1.6338 | 10.0651 | 1.51E-03 | 2.09E-02 | 8.6383  |
| C6orf132      | -2.3464 | 6.2608 | 10.0647 | 1.51E-03 | 2.09E-02 | 0.1966  |
| GPR144        | 2.8874  | 0.9732 | 10.0640 | 1.51E-03 | 2.09E-02 | 7.3995  |
| FPGT          | -3.7752 | 2.7020 | 10.0551 | 1.52E-03 | 2.09E-02 | 0.0730  |
| SNX20         | 3.2978  | 1.0269 | 10.0494 | 1.52E-03 | 2.10E-02 | 9.8340  |
| RNU6-1064P    | 2.2258  | 5.9932 | 10.0477 | 1.53E-03 | 2.10E-02 | 4.6777  |
| ABI3BP        | 2.6968  | 0.8072 | 10.0435 | 1.53E-03 | 2.10E-02 | 6.4838  |
| RCSD1         | 2.8697  | 0.9520 | 10.0332 | 1.54E-03 | 2.11E-02 | 7.3090  |
| GABRB3        | 2.1663  | 0.5878 | 10.0326 | 1.54E-03 | 2.11E-02 | 4.4888  |
| RECK          | 3.2312  | 0.7183 | 10.0267 | 1.54E-03 | 2.11E-02 | 9.3903  |
| CTBP2         | 2.0224  | 4.0287 | 10.0229 | 1.55E-03 | 2.11E-02 | 4.0625  |
| RP11-540A21.2 | 3.6839  | 1.3647 | 10.0205 | 1.55E-03 | 2.11E-02 | 12.8522 |
| VAX1          | 3.7981  | 2.1645 | 10.0158 | 1.55E-03 | 2.12E-02 | 13.9101 |
| TAGAP         | 2.2874  | 4.0853 | 10.0131 | 1.55E-03 | 2.12E-02 | 4.8819  |
| RP11-430B1.1  | 3.6050  | 1.3800 | 10.0108 | 1.56E-03 | 2.12E-02 | 12.1681 |
| CAMKK1        | 3.7238  | 1.1445 | 10.0016 | 1.56E-03 | 2.12E-02 | 13.2126 |
| SLC8A1-AS1    | 5.2946  | 3.6336 | 9.9812  | 1.58E-03 | 2.14E-02 | 39.2507 |
| FBN1          | 4.1152  | 1.6226 | 9.9804  | 1.58E-03 | 2.14E-02 | 17.3296 |
| FBXL17        | 2.6265  | 5.8607 | 9.9780  | 1.58E-03 | 2.14E-02 | 6.1752  |
| QRSL1         | 2.8619  | 0.7346 | 9.9756  | 1.59E-03 | 2.14E-02 | 7.2698  |

|               |         |        |        |          |          |         |
|---------------|---------|--------|--------|----------|----------|---------|
| KRR1          | 3.2554  | 1.2295 | 9.9751 | 1.59E-03 | 2.14E-02 | 9.5495  |
| KIAA0101*     | 2.3658  | 0.8733 | 9.9564 | 1.60E-03 | 2.15E-02 | 5.1545  |
| LRAT          | 4.8487  | 4.9796 | 9.9636 | 1.60E-03 | 2.15E-02 | 28.8143 |
| PTAFR         | 2.7742  | 0.8977 | 9.9615 | 1.60E-03 | 2.15E-02 | 6.8408  |
| SPRR3         | 2.1859  | 8.9155 | 9.9589 | 1.60E-03 | 2.15E-02 | 4.5502  |
| SOCS3         | 3.3705  | 7.6501 | 9.9577 | 1.60E-03 | 2.15E-02 | 10.3425 |
| ATP8A2        | 2.6460  | 1.2133 | 9.9558 | 1.60E-03 | 2.15E-02 | 6.2592  |
| ATP2A2        | 1.9825  | 5.5393 | 9.9506 | 1.61E-03 | 2.15E-02 | 3.9518  |
| BAHD1         | -2.6272 | 1.6517 | 9.9417 | 1.62E-03 | 2.16E-02 | 0.1619  |
| CTB-193M12.3  | 4.0468  | 1.6392 | 9.9416 | 1.62E-03 | 2.16E-02 | 16.5276 |
| P2RY13        | 3.3191  | 1.6958 | 9.9378 | 1.62E-03 | 2.16E-02 | 9.9804  |
| RGS17         | 2.2780  | 0.6472 | 9.9360 | 1.62E-03 | 2.16E-02 | 4.8499  |
| SLC7A11-AS1   | 2.8941  | 0.8915 | 9.9339 | 1.62E-03 | 2.16E-02 | 7.4339  |
| AC007952.5    | 4.4196  | 0.9171 | 9.9296 | 1.63E-03 | 2.16E-02 | 21.4016 |
| SEMA4D        | 3.7939  | 4.5854 | 9.9276 | 1.63E-03 | 2.16E-02 | 13.8702 |
| TMEM184A      | 2.6427  | 0.8081 | 9.9267 | 1.63E-03 | 2.16E-02 | 6.2452  |
| MIR940        | 3.0424  | 1.2100 | 9.9038 | 1.65E-03 | 2.19E-02 | 8.2386  |
| BTN2A2        | 2.3836  | 0.6708 | 9.9025 | 1.65E-03 | 2.19E-02 | 5.2184  |
| ARMC4         | 2.6632  | 0.8687 | 9.8984 | 1.65E-03 | 2.19E-02 | 6.3342  |
| TNS1          | 4.2260  | 1.4830 | 9.8933 | 1.66E-03 | 2.19E-02 | 18.7140 |
| CCP110        | 2.9008  | 1.5987 | 9.8924 | 1.66E-03 | 2.19E-02 | 7.4684  |
| ZNF674-AS1    | 3.3347  | 1.4753 | 9.8859 | 1.67E-03 | 2.19E-02 | 10.0891 |
| FRMD4A        | 4.1497  | 1.8684 | 9.8806 | 1.67E-03 | 2.20E-02 | 17.7499 |
| MAST3         | 3.4946  | 0.9621 | 9.8793 | 1.67E-03 | 2.20E-02 | 11.2714 |
| ITFG3         | -4.1341 | 2.1564 | 9.8752 | 1.68E-03 | 2.20E-02 | 0.0570  |
| RP11-401E5.2  | 3.5445  | 1.2297 | 9.8731 | 1.68E-03 | 2.20E-02 | 11.6677 |
| CTD-2650P22.2 | 2.1007  | 0.8907 | 9.8706 | 1.68E-03 | 2.20E-02 | 4.2891  |
| REPS2         | 3.6405  | 2.8498 | 9.8665 | 1.68E-03 | 2.20E-02 | 12.4709 |
| GRIK2         | 3.1078  | 0.9305 | 9.8609 | 1.69E-03 | 2.21E-02 | 8.6206  |
| KPNA3         | -2.9125 | 1.8741 | 9.8575 | 1.69E-03 | 2.21E-02 | 0.1328  |
| KCNJ14        | 3.1770  | 1.0006 | 9.8563 | 1.69E-03 | 2.21E-02 | 9.0444  |
| CTD-3010D24.3 | -3.3273 | 1.0696 | 9.8527 | 1.70E-03 | 2.21E-02 | 0.0996  |
| PFKM          | 6.0940  | 2.1987 | 9.8520 | 1.70E-03 | 2.21E-02 | 68.3083 |
| CDC42BPA      | -2.6724 | 4.0956 | 9.8377 | 1.71E-03 | 2.22E-02 | 0.1569  |
| SNTG1         | 2.0832  | 0.6789 | 9.8269 | 1.72E-03 | 2.23E-02 | 4.2376  |
| TTN-AS1       | 3.4804  | 0.8513 | 9.8254 | 1.72E-03 | 2.23E-02 | 11.1612 |
| KIAA0825      | 2.9892  | 2.5193 | 9.8206 | 1.73E-03 | 2.23E-02 | 7.9403  |
| STX5          | -2.2144 | 2.2357 | 9.8203 | 1.73E-03 | 2.23E-02 | 0.2155  |
| KIAA0125      | 2.5129  | 1.1152 | 9.8149 | 1.73E-03 | 2.24E-02 | 5.7075  |
| GJC1          | 3.0555  | 0.9762 | 9.8092 | 1.74E-03 | 2.24E-02 | 8.3138  |
| MC5R          | 3.8171  | 0.9153 | 9.8089 | 1.74E-03 | 2.24E-02 | 14.0945 |

|               |         |        |        |          |          |         |
|---------------|---------|--------|--------|----------|----------|---------|
| TLR2          | 3.3677  | 1.7673 | 9.8062 | 1.74E-03 | 2.24E-02 | 10.3220 |
| GPR180        | 3.0129  | 1.0587 | 9.7949 | 1.75E-03 | 2.25E-02 | 8.0718  |
| ATXN7         | -2.2783 | 4.8090 | 9.7832 | 1.76E-03 | 2.26E-02 | 0.2061  |
| AKR1B1        | -4.1661 | 1.4688 | 9.7788 | 1.77E-03 | 2.27E-02 | 0.0557  |
| RECQL         | 2.0535  | 0.5945 | 9.7762 | 1.77E-03 | 2.27E-02 | 4.1511  |
| CTNNA1        | 1.9868  | 7.2017 | 9.7749 | 1.77E-03 | 2.27E-02 | 3.9635  |
| RP1-65J11.5   | 2.2467  | 0.8981 | 9.7712 | 1.77E-03 | 2.27E-02 | 4.7461  |
| SMC5          | -3.1027 | 3.2141 | 9.7696 | 1.77E-03 | 2.27E-02 | 0.1164  |
| CXCL1         | 3.2150  | 4.2572 | 9.7622 | 1.78E-03 | 2.27E-02 | 9.2854  |
| ARSD          | 3.1841  | 1.0735 | 9.7620 | 1.78E-03 | 2.27E-02 | 9.0887  |
| PNN           | -2.8353 | 2.3096 | 9.7618 | 1.78E-03 | 2.27E-02 | 0.1401  |
| AMT           | 2.4849  | 0.6499 | 9.7356 | 1.81E-03 | 2.30E-02 | 5.5981  |
| NXPE3         | 3.3271  | 1.6160 | 9.7296 | 1.81E-03 | 2.31E-02 | 10.0360 |
| SRSF1         | -2.6062 | 6.7615 | 9.7257 | 1.82E-03 | 2.31E-02 | 0.1642  |
| PAK4          | 3.0844  | 2.1562 | 9.7212 | 1.82E-03 | 2.31E-02 | 8.4819  |
| GIGYF2        | -2.5511 | 4.1582 | 9.7166 | 1.83E-03 | 2.31E-02 | 0.1706  |
| PPP1R13B      | -2.7059 | 4.2899 | 9.7146 | 1.83E-03 | 2.31E-02 | 0.1533  |
| TMEM130       | 3.0061  | 2.0815 | 9.7092 | 1.83E-03 | 2.32E-02 | 8.0341  |
| GBP2          | 2.7790  | 3.6944 | 9.7074 | 1.84E-03 | 2.32E-02 | 6.8636  |
| PI4KA*        | 2.4970  | 1.0550 | 9.6992 | 1.84E-03 | 2.32E-02 | 5.6452  |
| HLA-DMA       | 1.9950  | 0.6622 | 9.7008 | 1.84E-03 | 2.32E-02 | 3.9860  |
| LDB3          | 3.1312  | 0.9539 | 9.6920 | 1.85E-03 | 2.33E-02 | 8.7617  |
| SLC25A11      | -3.6652 | 2.4644 | 9.6903 | 1.85E-03 | 2.33E-02 | 0.0788  |
| WIPF2         | -1.7717 | 8.7401 | 9.6897 | 1.85E-03 | 2.33E-02 | 0.2929  |
| INSIG2        | -2.1743 | 1.6491 | 9.6884 | 1.85E-03 | 2.33E-02 | 0.2215  |
| RP11-544A12.8 | 2.9034  | 0.7350 | 9.6878 | 1.85E-03 | 2.33E-02 | 7.4820  |
| PKDCC         | 1.9167  | 0.7560 | 9.6843 | 1.86E-03 | 2.33E-02 | 3.7757  |
| PCED1B-AS1    | 3.4090  | 0.8286 | 9.6789 | 1.86E-03 | 2.33E-02 | 10.6219 |
| MXRA7         | 2.3126  | 0.9944 | 9.6786 | 1.86E-03 | 2.33E-02 | 4.9679  |
| METTL16       | 2.9778  | 1.0889 | 9.6777 | 1.87E-03 | 2.33E-02 | 7.8776  |
| MGAT4C*       | 3.7642  | 2.5802 | 9.6725 | 1.87E-03 | 2.33E-02 | 13.5876 |
| METTL8        | 2.9393  | 1.1268 | 9.6672 | 1.88E-03 | 2.34E-02 | 7.6703  |
| HDAC9         | 3.4690  | 4.3673 | 9.6629 | 1.88E-03 | 2.34E-02 | 11.0729 |
| MANF          | -3.0156 | 1.3861 | 9.6604 | 1.88E-03 | 2.34E-02 | 0.1237  |
| ANO8          | 2.8626  | 0.9930 | 9.6565 | 1.89E-03 | 2.34E-02 | 7.2733  |
| BRD9          | 2.3941  | 0.7757 | 9.6429 | 1.90E-03 | 2.36E-02 | 5.2564  |
| RPS3A         | 2.4400  | 2.0559 | 9.6421 | 1.90E-03 | 2.36E-02 | 5.4263  |
| WFDC2         | 2.8868  | 4.3941 | 9.6377 | 1.91E-03 | 2.36E-02 | 7.3962  |
| MVK           | 3.1305  | 1.2458 | 9.6377 | 1.91E-03 | 2.36E-02 | 8.7572  |
| LRRC37B       | 2.5459  | 0.8217 | 9.6282 | 1.92E-03 | 2.37E-02 | 5.8397  |
| TMCO5B        | 4.3885  | 1.2050 | 9.6219 | 1.92E-03 | 2.37E-02 | 20.9452 |

|               |         |        |        |          |          |         |
|---------------|---------|--------|--------|----------|----------|---------|
| PRSS12        | 2.7358  | 1.4309 | 9.6199 | 1.92E-03 | 2.37E-02 | 6.6615  |
| RP11-350J20.5 | 3.5756  | 1.1705 | 9.6196 | 1.93E-03 | 2.37E-02 | 11.9221 |
| KLHL32        | 2.3252  | 0.7338 | 9.5964 | 1.95E-03 | 2.40E-02 | 5.0112  |
| ZNF37BP       | 3.2529  | 1.1777 | 9.5887 | 1.96E-03 | 2.40E-02 | 9.5330  |
| CEP250        | 2.1813  | 0.8271 | 9.5877 | 1.96E-03 | 2.40E-02 | 4.5356  |
| SSX2IP        | -3.5244 | 2.1548 | 9.5749 | 1.97E-03 | 2.42E-02 | 0.0869  |
| DNAJC8        | 2.5039  | 1.0807 | 9.5675 | 1.98E-03 | 2.42E-02 | 5.6720  |
| SCAMP1-AS1    | 2.9751  | 1.1520 | 9.5654 | 1.98E-03 | 2.42E-02 | 7.8631  |
| DACH2         | 2.0825  | 0.6032 | 9.5641 | 1.98E-03 | 2.42E-02 | 4.2355  |
| RP11-649A18.5 | 3.7436  | 1.1279 | 9.5594 | 1.99E-03 | 2.43E-02 | 13.3949 |
| ETV1          | 3.6325  | 1.6775 | 9.5500 | 2.00E-03 | 2.44E-02 | 12.4017 |
| SYT15         | 2.2911  | 1.0060 | 9.5492 | 2.00E-03 | 2.44E-02 | 4.8944  |
| CFLAR         | 1.9103  | 6.0449 | 9.5446 | 2.01E-03 | 2.44E-02 | 3.7588  |
| CFB           | -3.4502 | 1.0046 | 9.5385 | 2.01E-03 | 2.45E-02 | 0.0915  |
| ZCCHC4        | 3.1209  | 0.7442 | 9.5306 | 2.02E-03 | 2.45E-02 | 8.6994  |
| RP11-90P13.1  | 3.0562  | 1.0786 | 9.5283 | 2.02E-03 | 2.45E-02 | 8.3180  |
| MAGI2-AS3     | 2.7557  | 1.8660 | 9.5232 | 2.03E-03 | 2.46E-02 | 6.7537  |
| TIPARP        | 3.5292  | 3.4004 | 9.5213 | 2.03E-03 | 2.46E-02 | 11.5446 |
| GPR64         | 3.7692  | 0.9320 | 9.5212 | 2.03E-03 | 2.46E-02 | 13.6343 |
| RP1-28O17.1   | 3.5583  | 0.7802 | 9.5181 | 2.03E-03 | 2.46E-02 | 11.7799 |
| FOXC1         | -4.6639 | 1.5090 | 9.5145 | 2.04E-03 | 2.46E-02 | 0.0394  |
| UTP6          | 3.9814  | 1.6085 | 9.5062 | 2.05E-03 | 2.47E-02 | 15.7948 |
| UBR5          | -2.8289 | 3.8096 | 9.5036 | 2.05E-03 | 2.47E-02 | 0.1407  |
| AC012358.8    | 4.2520  | 1.4963 | 9.4998 | 2.05E-03 | 2.47E-02 | 19.0539 |
| DDHD1         | 4.0703  | 1.6954 | 9.4988 | 2.06E-03 | 2.47E-02 | 16.7995 |
| CTA-211A9.5   | 3.7374  | 1.2567 | 9.4910 | 2.06E-03 | 2.48E-02 | 13.3370 |
| CERKL         | 4.1779  | 1.2436 | 9.4907 | 2.07E-03 | 2.48E-02 | 18.1002 |
| ADAMTS6       | 3.9961  | 1.0892 | 9.4879 | 2.07E-03 | 2.48E-02 | 15.9565 |
| C1orf186      | 2.2542  | 0.6254 | 9.4855 | 2.07E-03 | 2.48E-02 | 4.7708  |
| TUBA1A        | 3.1902  | 1.7323 | 9.4822 | 2.07E-03 | 2.48E-02 | 9.1272  |
| AMBRA1        | -3.5081 | 4.7170 | 9.4793 | 2.08E-03 | 2.48E-02 | 0.0879  |
| PGRMC2        | -2.1862 | 5.6041 | 9.4702 | 2.09E-03 | 2.49E-02 | 0.2197  |
| SNORA70       | 5.3181  | 1.6693 | 9.4576 | 2.10E-03 | 2.50E-02 | 39.8944 |
| ASH2L         | 3.3001  | 3.6589 | 9.4563 | 2.10E-03 | 2.50E-02 | 9.8496  |
| MTURN         | -2.9778 | 3.2783 | 9.4556 | 2.11E-03 | 2.50E-02 | 0.1269  |
| TTL9          | 2.6748  | 1.0353 | 9.4449 | 2.12E-03 | 2.51E-02 | 6.3856  |
| CCBE1         | 3.5734  | 1.3049 | 9.4420 | 2.12E-03 | 2.51E-02 | 11.9046 |
| VPS26B        | -2.9528 | 1.7878 | 9.4413 | 2.12E-03 | 2.51E-02 | 0.1292  |
| GAREML        | 3.1158  | 0.8267 | 9.4386 | 2.12E-03 | 2.52E-02 | 8.6683  |
| SLC26A5       | 3.0085  | 0.6784 | 9.4344 | 2.13E-03 | 2.52E-02 | 8.0474  |
| CTD-2310F14.1 | 4.6173  | 2.7873 | 9.4339 | 2.13E-03 | 2.52E-02 | 24.5446 |



|                |         |         |        |          |          |         |
|----------------|---------|---------|--------|----------|----------|---------|
| UBE2D4         | 3.0756  | 1.5345  | 9.4278 | 2.14E-03 | 2.52E-02 | 8.4306  |
| SF3B4          | -2.3085 | 0.7473  | 9.4255 | 2.14E-03 | 2.52E-02 | 0.2019  |
| TOP3A          | 3.3620  | 2.0278  | 9.4236 | 2.14E-03 | 2.52E-02 | 10.2816 |
| SCLY           | 2.4686  | 0.8427  | 9.4234 | 2.14E-03 | 2.52E-02 | 5.5352  |
| FIGN           | 3.4806  | 1.2536  | 9.4162 | 2.15E-03 | 2.53E-02 | 11.1625 |
| SNX29          | 2.5793  | 1.5002  | 9.4098 | 2.16E-03 | 2.53E-02 | 5.9764  |
| CDH5           | 2.6549  | 2.1652  | 9.4063 | 2.16E-03 | 2.54E-02 | 6.2982  |
| H3F3B          | 2.1091  | 11.6121 | 9.4018 | 2.17E-03 | 2.54E-02 | 4.3143  |
| DNAJC28        | 3.7219  | 1.2505  | 9.3841 | 2.19E-03 | 2.56E-02 | 13.1952 |
| PDE2A          | 2.3004  | 0.7807  | 9.3830 | 2.19E-03 | 2.56E-02 | 4.9259  |
| CNFN           | -2.5664 | 3.4473  | 9.3810 | 2.19E-03 | 2.56E-02 | 0.1688  |
| PAK1           | -2.2924 | 5.2411  | 9.3796 | 2.19E-03 | 2.56E-02 | 0.2041  |
| SRP19          | -3.1933 | 3.2953  | 9.3765 | 2.20E-03 | 2.56E-02 | 0.1093  |
| ATP8B2         | 3.2046  | 1.1829  | 9.3710 | 2.20E-03 | 2.57E-02 | 9.2190  |
| SIGLEC9        | 3.7602  | 0.9723  | 9.3647 | 2.21E-03 | 2.57E-02 | 13.5498 |
| SAMD15*        | 2.6368  | 1.1090  | 9.3626 | 2.21E-03 | 2.57E-02 | 6.2195  |
| RP11-277P12.20 | 3.4055  | 2.3436  | 9.3608 | 2.22E-03 | 2.57E-02 | 10.5966 |
| RN7SKP38       | 2.2591  | 0.6222  | 9.3567 | 2.22E-03 | 2.58E-02 | 4.7869  |
| UBXN4          | 2.5583  | 3.1183  | 9.3515 | 2.23E-03 | 2.58E-02 | 5.8901  |
| UNC50          | -2.8453 | 0.8848  | 9.3507 | 2.23E-03 | 2.58E-02 | 0.1391  |
| TNR            | 3.3786  | 2.0392  | 9.3434 | 2.24E-03 | 2.59E-02 | 10.4010 |
| TTF2           | 2.6833  | 1.0902  | 9.3406 | 2.24E-03 | 2.59E-02 | 6.4231  |
| SNHG14         | 3.6784  | 2.8691  | 9.3332 | 2.25E-03 | 2.60E-02 | 12.8025 |
| MTCH1          | -2.2046 | 5.9094  | 9.3330 | 2.25E-03 | 2.60E-02 | 0.2170  |
| C1RL           | 3.0736  | 0.9889  | 9.3170 | 2.27E-03 | 2.62E-02 | 8.4189  |
| MIR143HG       | 2.0931  | 0.6488  | 9.3153 | 2.27E-03 | 2.62E-02 | 4.2667  |
| TSTA3          | 2.8355  | 1.9574  | 9.3075 | 2.28E-03 | 2.62E-02 | 7.1381  |
| CEP70          | -2.0876 | 0.9620  | 9.3023 | 2.29E-03 | 2.63E-02 | 0.2353  |
| DGKG           | 2.2415  | 0.6706  | 9.2984 | 2.29E-03 | 2.63E-02 | 4.7289  |
| ERVW-1         | 2.5206  | 2.1418  | 9.2944 | 2.30E-03 | 2.64E-02 | 5.7384  |
| CDC20B         | 2.0010  | 0.6980  | 9.2924 | 2.30E-03 | 2.64E-02 | 4.0027  |
| DENND2D        | -3.2362 | 2.3634  | 9.2842 | 2.31E-03 | 2.64E-02 | 0.1061  |
| SLAMF7         | 2.6638  | 1.2365  | 9.2842 | 2.31E-03 | 2.64E-02 | 6.3369  |
| RP11-736N17.4  | 3.7693  | 1.0415  | 9.2782 | 2.32E-03 | 2.65E-02 | 13.6352 |
| GAK            | -2.3437 | 3.9272  | 9.2752 | 2.32E-03 | 2.65E-02 | 0.1970  |
| FANCA          | 2.4415  | 0.9610  | 9.2719 | 2.33E-03 | 2.65E-02 | 5.4319  |
| RGS6           | 2.7753  | 1.0326  | 9.2702 | 2.33E-03 | 2.65E-02 | 6.8462  |
| PLEKHG5        | 2.8116  | 0.7955  | 9.2665 | 2.33E-03 | 2.65E-02 | 7.0204  |
| RP11-123C21.2  | 4.5265  | 1.5455  | 9.2543 | 2.35E-03 | 2.67E-02 | 23.0470 |
| RP4-564F22.5   | 3.3869  | 0.9944  | 9.2496 | 2.36E-03 | 2.67E-02 | 10.4606 |
| RP11-87E22.2   | 3.0058  | 1.1508  | 9.2483 | 2.36E-03 | 2.67E-02 | 8.0325  |

|               |         |         |        |          |          |          |
|---------------|---------|---------|--------|----------|----------|----------|
| ELMO2         | 3.6104  | 2.1344  | 9.2482 | 2.36E-03 | 2.67E-02 | 12.2139  |
| FAM160B1      | -2.8509 | 3.9397  | 9.2347 | 2.37E-03 | 2.69E-02 | 0.1386   |
| SNAP25        | 2.2488  | 0.6802  | 9.2315 | 2.38E-03 | 2.69E-02 | 4.7528   |
| EDN1          | -2.1788 | 5.1179  | 9.2315 | 2.38E-03 | 2.69E-02 | 0.2209   |
| RP11-51J9.5   | 2.7421  | 1.2515  | 9.2255 | 2.39E-03 | 2.69E-02 | 6.6902   |
| GNPDA1        | -2.9287 | 3.1211  | 9.2245 | 2.39E-03 | 2.69E-02 | 0.1313   |
| NDUFA6-AS1    | 1.9861  | 0.6333  | 9.2244 | 2.39E-03 | 2.69E-02 | 3.9617   |
| FH            | 2.3441  | 0.8128  | 9.2237 | 2.39E-03 | 2.69E-02 | 5.0774   |
| SPCS3         | -2.4091 | 7.8661  | 9.2233 | 2.39E-03 | 2.69E-02 | 0.1883   |
| LOXL2         | 2.9654  | 1.2759  | 9.2095 | 2.41E-03 | 2.70E-02 | 7.8106   |
| SLC12A4       | 2.4125  | 0.5879  | 9.2085 | 2.41E-03 | 2.70E-02 | 5.3238   |
| NAA35         | 3.4414  | 1.3879  | 9.2085 | 2.41E-03 | 2.70E-02 | 10.8630  |
| RAP2A         | -2.6538 | 4.4258  | 9.2084 | 2.41E-03 | 2.70E-02 | 0.1589   |
| SLC22A18      | 1.9796  | 1.4234  | 9.2024 | 2.42E-03 | 2.70E-02 | 3.9439   |
| CATIP         | 3.2977  | 1.1897  | 9.1590 | 2.48E-03 | 2.77E-02 | 9.8335   |
| ZNF827        | 2.3548  | 1.9105  | 9.1552 | 2.48E-03 | 2.77E-02 | 5.1152   |
| CTD-3131K8.3  | 3.1197  | 1.2313  | 9.1454 | 2.49E-03 | 2.78E-02 | 8.6921   |
| DGCR6L        | -2.1152 | 0.6445  | 9.1449 | 2.49E-03 | 2.78E-02 | 0.2308   |
| C9orf91       | 2.8969  | 0.7895  | 9.1442 | 2.50E-03 | 2.78E-02 | 7.4481   |
| PCBP1-AS1     | -1.7890 | 5.1866  | 9.1414 | 2.50E-03 | 2.78E-02 | 0.2894   |
| STAG3L3       | 3.9576  | 1.5118  | 9.1350 | 2.51E-03 | 2.79E-02 | 15.5363  |
| ADAMDEC1      | 2.5210  | 0.8203  | 9.1342 | 2.51E-03 | 2.79E-02 | 5.7397   |
| MAP2          | 3.2094  | 1.6136  | 9.1317 | 2.51E-03 | 2.79E-02 | 9.2498   |
| PLIN1         | 3.7824  | 1.4462  | 9.1204 | 2.53E-03 | 2.80E-02 | 13.7600  |
| RAE1          | 4.3424  | 1.2976  | 9.1184 | 2.53E-03 | 2.80E-02 | 20.2851  |
| IREB2         | -2.7684 | 3.4835  | 9.1133 | 2.54E-03 | 2.81E-02 | 0.1468   |
| PSMB5         | -2.4637 | 2.9302  | 9.1110 | 2.54E-03 | 2.81E-02 | 0.1813   |
| PTGR1         | 2.4092  | 2.4332  | 9.0982 | 2.56E-03 | 2.82E-02 | 5.3119   |
| HIAT1         | 3.0144  | 0.8605  | 9.0941 | 2.56E-03 | 2.83E-02 | 8.0805   |
| DVL2          | 2.2945  | 0.7915  | 9.0909 | 2.57E-03 | 2.83E-02 | 4.9059   |
| TK2           | 1.9769  | 0.6154  | 9.0894 | 2.57E-03 | 2.83E-02 | 3.9363   |
| PLAT          | 3.1160  | 2.3118  | 9.0839 | 2.58E-03 | 2.83E-02 | 8.6697   |
| PLA2G16       | 4.2855  | 2.6181  | 9.0832 | 2.58E-03 | 2.83E-02 | 19.5012  |
| HIST1H3B      | 7.0434  | 5.2724  | 9.0782 | 2.59E-03 | 2.84E-02 | 131.9127 |
| DPY19L2P1     | 2.0473  | 0.7600  | 9.0686 | 2.60E-03 | 2.85E-02 | 4.1334   |
| SPTLC3*       | 2.1495  | 0.7713  | 9.0544 | 2.62E-03 | 2.87E-02 | 4.4367   |
| CSF3R         | 3.1135  | 4.5354  | 9.0545 | 2.62E-03 | 2.87E-02 | 8.6545   |
| DPP10         | 2.7803  | 0.9812  | 9.0430 | 2.64E-03 | 2.88E-02 | 6.8700   |
| ZNF180        | 2.2500  | 0.6318  | 9.0385 | 2.64E-03 | 2.89E-02 | 4.7568   |
| RP11-941H19.2 | 6.6829  | 5.0871  | 9.0309 | 2.65E-03 | 2.90E-02 | 102.7464 |
| IL1RN         | 2.1336  | 10.9790 | 9.0047 | 2.69E-03 | 2.94E-02 | 4.3881   |

|               |         |         |        |          |          |         |
|---------------|---------|---------|--------|----------|----------|---------|
| ZIC5          | 3.6725  | 1.3439  | 8.9884 | 2.72E-03 | 2.96E-02 | 12.7507 |
| LBR           | -2.2078 | 4.5319  | 8.9806 | 2.73E-03 | 2.97E-02 | 0.2165  |
| SOX11         | 2.8010  | 4.2177  | 8.9740 | 2.74E-03 | 2.97E-02 | 6.9691  |
| CCL3          | 3.3679  | 2.0473  | 8.9735 | 2.74E-03 | 2.97E-02 | 10.3238 |
| WWC2          | 2.4302  | 0.7886  | 8.9724 | 2.74E-03 | 2.97E-02 | 5.3897  |
| RP11-575A19.2 | -3.1987 | 1.0792  | 8.9659 | 2.75E-03 | 2.98E-02 | 0.1089  |
| HOXB8         | 2.7021  | 0.8201  | 8.9434 | 2.78E-03 | 3.01E-02 | 6.5076  |
| ERMP1         | 3.3354  | 2.3868  | 8.9428 | 2.79E-03 | 3.01E-02 | 10.0937 |
| MSANTD4       | -3.2777 | 0.8123  | 8.9408 | 2.79E-03 | 3.01E-02 | 0.1031  |
| PRR15L        | -2.0142 | 3.5777  | 8.9371 | 2.79E-03 | 3.02E-02 | 0.2475  |
| ARHGEF28      | 3.0018  | 1.3847  | 8.9337 | 2.80E-03 | 3.02E-02 | 8.0098  |
| PBX3          | 3.8158  | 1.4129  | 8.9196 | 2.82E-03 | 3.04E-02 | 14.0826 |
| HEATR6        | 1.9615  | 0.6524  | 8.9176 | 2.82E-03 | 3.04E-02 | 3.8947  |
| RSRC2         | -2.6145 | 2.7386  | 8.9160 | 2.83E-03 | 3.04E-02 | 0.1633  |
| SOX4          | 2.4802  | 10.5198 | 8.9124 | 2.83E-03 | 3.05E-02 | 5.5796  |
| RP11-849H4.2  | 4.2777  | 1.3252  | 8.9101 | 2.84E-03 | 3.05E-02 | 19.3958 |
| ZNF280D       | 3.4179  | 2.5196  | 8.9021 | 2.85E-03 | 3.06E-02 | 10.6880 |
| COPS8         | 2.4625  | 0.8599  | 8.8994 | 2.85E-03 | 3.06E-02 | 5.5115  |
| ZFP30         | 2.9555  | 1.1308  | 8.8979 | 2.85E-03 | 3.06E-02 | 7.7567  |
| CERS6-AS1     | 2.3477  | 0.7153  | 8.8967 | 2.86E-03 | 3.06E-02 | 5.0902  |
| AMY2B         | 2.4610  | 2.7110  | 8.8907 | 2.87E-03 | 3.06E-02 | 5.5062  |
| ZDHHC4        | -2.4144 | 0.8407  | 8.8890 | 2.87E-03 | 3.06E-02 | 0.1876  |
| PPP1R7        | -3.3607 | 2.0656  | 8.8658 | 2.91E-03 | 3.10E-02 | 0.0973  |
| KREMEN1       | 3.5431  | 1.5652  | 8.8613 | 2.91E-03 | 3.11E-02 | 11.6567 |
| MSH2          | 2.9395  | 2.8211  | 8.8441 | 2.94E-03 | 3.13E-02 | 7.6715  |
| TMEM9B        | -2.2474 | 6.4727  | 8.8429 | 2.94E-03 | 3.13E-02 | 0.2106  |
| CWC25         | -3.0662 | 2.6721  | 8.8416 | 2.94E-03 | 3.13E-02 | 0.1194  |
| RNF39         | -2.5004 | 0.8139  | 8.8410 | 2.95E-03 | 3.13E-02 | 0.1767  |
| ACTL6A        | 2.4710  | 0.7837  | 8.8390 | 2.95E-03 | 3.13E-02 | 5.5445  |
| RP11-56P23.1  | 1.8912  | 0.5640  | 8.8315 | 2.96E-03 | 3.14E-02 | 3.7095  |
| TNN           | 2.0315  | 0.6597  | 8.8301 | 2.96E-03 | 3.14E-02 | 4.0882  |
| DPY19L2P2     | 1.9186  | 0.6488  | 8.8251 | 2.97E-03 | 3.14E-02 | 3.7806  |
| ZNF280B       | 2.4659  | 1.2141  | 8.8201 | 2.98E-03 | 3.15E-02 | 5.5246  |
| SYNE3         | 3.4715  | 1.6854  | 8.8189 | 2.98E-03 | 3.15E-02 | 11.0925 |
| GGCT          | -3.0697 | 1.5253  | 8.8160 | 2.99E-03 | 3.15E-02 | 0.1191  |
| KLRD1         | 3.0877  | 1.4875  | 8.8122 | 2.99E-03 | 3.15E-02 | 8.5014  |
| CEP41         | 3.3018  | 1.6029  | 8.8113 | 2.99E-03 | 3.15E-02 | 9.8618  |
| MMP1          | -3.4073 | 1.2492  | 8.8096 | 3.00E-03 | 3.15E-02 | 0.0943  |
| PRRX1         | 4.8248  | 5.0280  | 8.8044 | 3.01E-03 | 3.16E-02 | 28.3400 |
| RAB26         | 2.3769  | 0.7341  | 8.8030 | 3.01E-03 | 3.16E-02 | 5.1942  |
| TMEM51        | 2.6211  | 2.4186  | 8.7925 | 3.02E-03 | 3.18E-02 | 6.1522  |

|               |         |        |        |          |          |         |
|---------------|---------|--------|--------|----------|----------|---------|
| MFSD1         | 2.6136  | 1.8566 | 8.7872 | 3.03E-03 | 3.18E-02 | 6.1204  |
| POM121L9P     | 3.0923  | 1.2830 | 8.7807 | 3.04E-03 | 3.19E-02 | 8.5288  |
| RP11-10N16.2  | 1.8385  | 0.5385 | 8.7717 | 3.06E-03 | 3.20E-02 | 3.5765  |
| TRIM71        | 2.6332  | 0.8223 | 8.7676 | 3.07E-03 | 3.21E-02 | 6.2039  |
| EIF4A3        | 3.3044  | 4.3776 | 8.7627 | 3.07E-03 | 3.21E-02 | 9.8790  |
| RP11-426L16.3 | 1.9191  | 0.7980 | 8.7563 | 3.09E-03 | 3.22E-02 | 3.7820  |
| SLCO5A1       | 3.8352  | 2.2607 | 8.7528 | 3.09E-03 | 3.22E-02 | 14.2727 |
| KIAA1107      | 2.7597  | 0.8500 | 8.7423 | 3.11E-03 | 3.24E-02 | 6.7728  |
| KIAA1211L     | 2.4324  | 0.6140 | 8.7404 | 3.11E-03 | 3.24E-02 | 5.3981  |
| CACNA1B       | 2.6162  | 1.0282 | 8.7403 | 3.11E-03 | 3.24E-02 | 6.1313  |
| ENO3          | 1.9431  | 0.6718 | 8.7386 | 3.12E-03 | 3.24E-02 | 3.8452  |
| ARHGEF9       | 3.2819  | 2.5894 | 8.7371 | 3.12E-03 | 3.24E-02 | 9.7267  |
| FYB           | 2.9340  | 3.0030 | 8.7300 | 3.13E-03 | 3.25E-02 | 7.6422  |
| URM1          | -2.4515 | 1.1984 | 8.7283 | 3.13E-03 | 3.25E-02 | 0.1828  |
| RP11-43N5.1   | -3.3215 | 0.8916 | 8.7112 | 3.16E-03 | 3.27E-02 | 0.1000  |
| AC106876.2    | -3.0416 | 1.2567 | 8.7104 | 3.16E-03 | 3.27E-02 | 0.1214  |
| SMEK1         | -1.9256 | 7.7071 | 8.6910 | 3.20E-03 | 3.31E-02 | 0.2632  |
| DNAJC6        | 1.9854  | 0.6719 | 8.6854 | 3.21E-03 | 3.31E-02 | 3.9598  |
| ESYT1         | -2.7610 | 3.3477 | 8.6819 | 3.21E-03 | 3.31E-02 | 0.1475  |
| ATP6AP2       | -2.7536 | 3.8709 | 8.6812 | 3.22E-03 | 3.31E-02 | 0.1483  |
| PCMTD2        | -3.2964 | 1.5537 | 8.6800 | 3.22E-03 | 3.31E-02 | 0.1018  |
| IGF1          | 2.8998  | 1.4717 | 8.6738 | 3.23E-03 | 3.32E-02 | 7.4631  |
| PRKRIRP9      | 2.8082  | 0.8884 | 8.6444 | 3.28E-03 | 3.37E-02 | 7.0040  |
| CASC15        | 3.2417  | 0.7977 | 8.6386 | 3.29E-03 | 3.38E-02 | 9.4594  |
| C5orf15       | -2.2563 | 4.9362 | 8.6375 | 3.29E-03 | 3.38E-02 | 0.2093  |
| AC091969.1    | 2.0569  | 0.7122 | 8.6346 | 3.30E-03 | 3.38E-02 | 4.1609  |
| SCIMP         | 2.1024  | 0.6219 | 8.6237 | 3.32E-03 | 3.40E-02 | 4.2941  |
| CLVS1         | 1.8770  | 0.5763 | 8.6195 | 3.33E-03 | 3.40E-02 | 3.6731  |
| UNC79         | 2.5872  | 1.1657 | 8.6157 | 3.33E-03 | 3.40E-02 | 6.0093  |
| ACSBG2        | 2.3057  | 0.9635 | 8.6157 | 3.33E-03 | 3.40E-02 | 4.9440  |
| RP11-118B18.1 | 2.0310  | 0.7752 | 8.6150 | 3.33E-03 | 3.40E-02 | 4.0868  |
| ZNF483        | 3.0417  | 1.8312 | 8.6137 | 3.34E-03 | 3.40E-02 | 8.2345  |
| KLF9          | 2.6432  | 3.4014 | 8.6052 | 3.35E-03 | 3.42E-02 | 6.2474  |
| PTGR2         | 2.5627  | 1.1148 | 8.5985 | 3.36E-03 | 3.43E-02 | 5.9082  |
| OSTCP1        | 4.0597  | 1.3386 | 8.5900 | 3.38E-03 | 3.44E-02 | 16.6765 |
| WWTR1         | -2.0450 | 4.2458 | 8.5864 | 3.39E-03 | 3.44E-02 | 0.2423  |
| AC007040.11   | 2.6869  | 0.8819 | 8.5864 | 3.39E-03 | 3.44E-02 | 6.4394  |
| RP11-490M8.1  | -2.5002 | 0.6855 | 8.5755 | 3.41E-03 | 3.46E-02 | 0.1767  |
| C12orf77      | 2.1338  | 0.7311 | 8.5730 | 3.41E-03 | 3.46E-02 | 4.3888  |
| C10orf53      | 3.6973  | 1.4475 | 8.5557 | 3.44E-03 | 3.49E-02 | 12.9714 |
| FBXW4         | 2.5209  | 4.7300 | 8.5518 | 3.45E-03 | 3.49E-02 | 5.7392  |

|              |         |        |        |          |          |         |
|--------------|---------|--------|--------|----------|----------|---------|
| UBA52P6      | -2.0950 | 0.5880 | 8.5375 | 3.48E-03 | 3.52E-02 | 0.2341  |
| TPRN         | -2.1674 | 3.8377 | 8.5274 | 3.50E-03 | 3.53E-02 | 0.2226  |
| RBFOX3       | 1.9322  | 0.7903 | 8.5255 | 3.50E-03 | 3.53E-02 | 3.8163  |
| ELP5         | 3.0392  | 1.9665 | 8.5120 | 3.53E-03 | 3.56E-02 | 8.2205  |
| RAPGEF5      | -2.4293 | 2.2497 | 8.5081 | 3.54E-03 | 3.56E-02 | 0.1857  |
| PAX8         | 3.1006  | 1.8695 | 8.5080 | 3.54E-03 | 3.56E-02 | 8.5780  |
| SEC63P2      | 2.7408  | 0.7099 | 8.5072 | 3.54E-03 | 3.56E-02 | 6.6842  |
| CTSC         | 2.9296  | 1.9498 | 8.5028 | 3.55E-03 | 3.56E-02 | 7.6190  |
| PREP         | -2.6535 | 3.4574 | 8.4990 | 3.55E-03 | 3.57E-02 | 0.1589  |
| RP11-21L23.2 | 2.3740  | 0.6957 | 8.4979 | 3.56E-03 | 3.57E-02 | 5.1837  |
| RNF185       | -3.1051 | 2.2571 | 8.4959 | 3.56E-03 | 3.57E-02 | 0.1162  |
| PDE4C        | 2.4877  | 3.0265 | 8.4880 | 3.57E-03 | 3.57E-02 | 5.6088  |
| LRCH3        | 2.7851  | 1.7572 | 8.4878 | 3.58E-03 | 3.57E-02 | 6.8930  |
| NOVA1        | 2.5413  | 2.2364 | 8.4872 | 3.58E-03 | 3.57E-02 | 5.8210  |
| GALR1        | 4.5192  | 1.2428 | 8.4862 | 3.58E-03 | 3.57E-02 | 22.9313 |
| ZBTB4        | -2.9650 | 3.8360 | 8.4858 | 3.58E-03 | 3.57E-02 | 0.1281  |
| GNPTAB       | 2.4687  | 1.6870 | 8.4854 | 3.58E-03 | 3.57E-02 | 5.5354  |
| ZFYVE26      | 3.1109  | 1.5451 | 8.4783 | 3.59E-03 | 3.58E-02 | 8.6392  |
| SGIP1        | 3.8455  | 0.8914 | 8.4778 | 3.60E-03 | 3.58E-02 | 14.3748 |
| ANKRD18B     | 3.9440  | 3.0537 | 8.4746 | 3.60E-03 | 3.58E-02 | 15.3910 |
| TNFSF14      | 3.8169  | 1.0471 | 8.4737 | 3.60E-03 | 3.58E-02 | 14.0926 |
| VRK2         | 2.6031  | 0.8455 | 8.4667 | 3.62E-03 | 3.59E-02 | 6.0761  |
| NAA38        | 1.5845  | 0.8981 | 8.4656 | 3.62E-03 | 3.59E-02 | 2.9991  |
| CTC-457E21.1 | 4.2884  | 1.6661 | 8.4622 | 3.63E-03 | 3.59E-02 | 19.5412 |
| ZNF431       | 3.1851  | 4.0117 | 8.4546 | 3.64E-03 | 3.61E-02 | 9.0949  |
| CLDN7        | -1.6249 | 5.8771 | 8.4508 | 3.65E-03 | 3.61E-02 | 0.3242  |
| MYRIP        | 2.7083  | 1.4349 | 8.4493 | 3.65E-03 | 3.61E-02 | 6.5353  |
| RILPL2       | 3.1926  | 3.4378 | 8.4381 | 3.67E-03 | 3.62E-02 | 9.1426  |
| DMXL2        | 2.9616  | 1.7556 | 8.4377 | 3.68E-03 | 3.62E-02 | 7.7900  |
| CORO7        | 4.0353  | 1.0920 | 8.4373 | 3.68E-03 | 3.62E-02 | 16.3961 |
| USP48        | -2.8750 | 1.3213 | 8.4355 | 3.68E-03 | 3.63E-02 | 0.1363  |
| AC090099.1   | 3.2307  | 0.9963 | 8.4317 | 3.69E-03 | 3.63E-02 | 9.3874  |
| CCDC144CP    | 2.7389  | 1.0645 | 8.4236 | 3.70E-03 | 3.64E-02 | 6.6755  |
| MIA3         | -2.1734 | 3.0739 | 8.4218 | 3.71E-03 | 3.64E-02 | 0.2217  |
| FANCF        | 3.9886  | 2.9534 | 8.4203 | 3.71E-03 | 3.64E-02 | 15.8745 |
| SMURF2       | -2.6301 | 5.0664 | 8.4063 | 3.74E-03 | 3.67E-02 | 0.1615  |
| ZNF326       | -1.9674 | 5.2497 | 8.4017 | 3.75E-03 | 3.67E-02 | 0.2557  |
| APOA1BP      | -2.6527 | 2.5789 | 8.3902 | 3.77E-03 | 3.69E-02 | 0.1590  |
| PDDC1        | 2.0303  | 0.6007 | 8.3800 | 3.79E-03 | 3.71E-02 | 4.0848  |
| RP3-507I15.1 | 2.6630  | 1.8809 | 8.3783 | 3.80E-03 | 3.71E-02 | 6.3336  |
| BRAT1        | 3.0241  | 0.9492 | 8.3758 | 3.80E-03 | 3.71E-02 | 8.1349  |

|               |         |        |        |          |          |         |
|---------------|---------|--------|--------|----------|----------|---------|
| AC004156.3    | 3.1980  | 2.5657 | 8.3744 | 3.81E-03 | 3.71E-02 | 9.1766  |
| HYKK          | 3.1130  | 1.1659 | 8.3662 | 3.82E-03 | 3.73E-02 | 8.6517  |
| PDE4B         | 2.7525  | 2.0177 | 8.3643 | 3.83E-03 | 3.73E-02 | 6.7389  |
| WDR3          | 2.9493  | 2.1821 | 8.3482 | 3.86E-03 | 3.76E-02 | 7.7237  |
| PPIF          | 2.7488  | 5.5032 | 8.3458 | 3.87E-03 | 3.76E-02 | 6.7217  |
| TSPAN15       | -1.8929 | 5.6545 | 8.3430 | 3.87E-03 | 3.76E-02 | 0.2693  |
| REV3L-IT1     | 2.7964  | 1.6974 | 8.3429 | 3.87E-03 | 3.76E-02 | 6.9472  |
| RP11-689P11.3 | 3.4600  | 0.9528 | 8.3410 | 3.88E-03 | 3.76E-02 | 11.0045 |
| DCAF12        | -1.8190 | 6.7809 | 8.3279 | 3.90E-03 | 3.79E-02 | 0.2834  |
| TAOK3         | -1.7448 | 6.4994 | 8.3215 | 3.92E-03 | 3.79E-02 | 0.2984  |
| GPC3          | 3.1354  | 1.0481 | 8.3213 | 3.92E-03 | 3.79E-02 | 8.7871  |
| PSME2         | -2.0958 | 3.0368 | 8.3162 | 3.93E-03 | 3.80E-02 | 0.2339  |
| CARS2         | 2.2041  | 0.9123 | 8.3161 | 3.93E-03 | 3.80E-02 | 4.6078  |
| SLC4A7        | -2.8167 | 2.0909 | 8.3153 | 3.93E-03 | 3.80E-02 | 0.1419  |
| BAALC-AS1     | 1.8594  | 0.5872 | 8.3044 | 3.95E-03 | 3.81E-02 | 3.6285  |
| MRPL27        | -2.6349 | 1.8754 | 8.3041 | 3.96E-03 | 3.81E-02 | 0.1610  |
| NFKB1         | 2.2278  | 3.1741 | 8.3020 | 3.96E-03 | 3.81E-02 | 4.6843  |
| FUT6          | 3.1415  | 0.9790 | 8.3016 | 3.96E-03 | 3.81E-02 | 8.8246  |
| AC079612.2*   | 3.1409  | 1.7490 | 8.2749 | 4.02E-03 | 3.84E-02 | 8.8205  |
| FOXO3*        | -2.0472 | 5.2326 | 8.2746 | 4.02E-03 | 3.84E-02 | 0.2420  |
| RP11-519G16.3 | 2.9914  | 1.4747 | 8.2864 | 3.99E-03 | 3.84E-02 | 7.9526  |
| FABP5P15      | 2.9068  | 1.1652 | 8.2816 | 4.00E-03 | 3.84E-02 | 7.4995  |
| C20orf166     | 3.3502  | 1.5372 | 8.2796 | 4.01E-03 | 3.84E-02 | 10.1981 |
| APOBEC3G      | 3.0058  | 1.7745 | 8.2781 | 4.01E-03 | 3.84E-02 | 8.0321  |
| RP11-611E13.2 | -3.3015 | 0.9982 | 8.2773 | 4.01E-03 | 3.84E-02 | 0.1014  |
| LMF2          | -2.4816 | 0.8482 | 8.2769 | 4.02E-03 | 3.84E-02 | 0.1790  |
| BCL2L14       | 2.0730  | 1.9329 | 8.2752 | 4.02E-03 | 3.84E-02 | 4.2076  |
| SULT2B1       | 2.3159  | 0.7443 | 8.2746 | 4.02E-03 | 3.84E-02 | 4.9793  |
| ANKRD20A8P    | 4.1910  | 1.9747 | 8.2546 | 4.06E-03 | 3.88E-02 | 18.2645 |
| ZKSCAN8       | 3.2784  | 1.1391 | 8.2534 | 4.07E-03 | 3.88E-02 | 9.7030  |
| DENR          | -2.2293 | 3.5997 | 8.2520 | 4.07E-03 | 3.88E-02 | 0.2133  |
| LCP2          | 2.5672  | 7.1436 | 8.2483 | 4.08E-03 | 3.88E-02 | 5.9267  |
| RP4-601P9.1   | 1.9040  | 0.6222 | 8.2368 | 4.10E-03 | 3.90E-02 | 3.7424  |
| CC2D2A        | 3.6323  | 1.2319 | 8.2367 | 4.11E-03 | 3.90E-02 | 12.4003 |
| RP11-680B3.2  | 3.3599  | 1.7058 | 8.2338 | 4.11E-03 | 3.90E-02 | 10.2670 |
| SLC12A9       | 3.1734  | 1.8065 | 8.2332 | 4.11E-03 | 3.90E-02 | 9.0215  |
| GPC4          | 3.4939  | 0.9413 | 8.2328 | 4.11E-03 | 3.90E-02 | 11.2662 |
| RP11-319G9.3  | 2.9280  | 1.9458 | 8.2289 | 4.12E-03 | 3.90E-02 | 7.6105  |
| XKR9          | 3.3955  | 0.9951 | 8.2199 | 4.14E-03 | 3.92E-02 | 10.5230 |
| LINC00511     | -2.7196 | 2.8301 | 8.2094 | 4.17E-03 | 3.94E-02 | 0.1518  |
| TMEM125       | -3.4119 | 1.7578 | 8.2014 | 4.19E-03 | 3.95E-02 | 0.0940  |

|               |         |        |        |          |          |         |
|---------------|---------|--------|--------|----------|----------|---------|
| PALM2         | 3.4777  | 1.5743 | 8.2001 | 4.19E-03 | 3.95E-02 | 11.1405 |
| APOOL         | 2.5561  | 8.8316 | 8.1959 | 4.20E-03 | 3.96E-02 | 5.8813  |
| NLRP2         | 3.7796  | 0.9959 | 8.1939 | 4.20E-03 | 3.96E-02 | 13.7332 |
| NDUFA2        | 2.1216  | 2.7631 | 8.1928 | 4.21E-03 | 3.96E-02 | 4.3517  |
| GON4L         | 2.9793  | 2.3090 | 8.1922 | 4.21E-03 | 3.96E-02 | 7.8861  |
| NCKAP1L       | 3.0360  | 1.0801 | 8.1881 | 4.22E-03 | 3.96E-02 | 8.2022  |
| CBLN2         | 2.6974  | 0.8868 | 8.1876 | 4.22E-03 | 3.96E-02 | 6.4864  |
| ARHGEF3       | 3.4986  | 1.1600 | 8.1871 | 4.22E-03 | 3.96E-02 | 11.3030 |
| RP5-1125A11.1 | -3.4865 | 1.0084 | 8.1819 | 4.23E-03 | 3.97E-02 | 0.0892  |
| ANKRD44       | 2.9199  | 2.2091 | 8.1767 | 4.24E-03 | 3.97E-02 | 7.5680  |
| FAM198B       | -3.0293 | 3.4168 | 8.1683 | 4.26E-03 | 3.99E-02 | 0.1225  |
| ZNF556        | 2.1716  | 0.7260 | 8.1652 | 4.27E-03 | 3.99E-02 | 4.5053  |
| FLII          | -3.0032 | 1.2944 | 8.1648 | 4.27E-03 | 3.99E-02 | 0.1247  |
| AC010987.5    | 3.3016  | 2.0906 | 8.1576 | 4.29E-03 | 4.00E-02 | 9.8598  |
| HIPK1-AS1     | 2.9204  | 0.9630 | 8.1561 | 4.29E-03 | 4.00E-02 | 7.5705  |
| ERICH1        | 2.3728  | 0.9724 | 8.1553 | 4.29E-03 | 4.00E-02 | 5.1795  |
| RNU6-428P     | 5.2044  | 5.1318 | 8.1526 | 4.30E-03 | 4.00E-02 | 36.8708 |
| PABPN1        | -1.4774 | 9.5267 | 8.1513 | 4.30E-03 | 4.00E-02 | 0.3591  |
| SEPT10        | 2.4414  | 3.7238 | 8.1489 | 4.31E-03 | 4.01E-02 | 5.4318  |
| ETV7          | 1.9690  | 0.5950 | 8.1427 | 4.32E-03 | 4.02E-02 | 3.9148  |
| ENTPD1-AS1    | 3.0047  | 1.7144 | 8.1314 | 4.35E-03 | 4.04E-02 | 8.0263  |
| FAM133A*      | 2.4338  | 1.7707 | 8.1242 | 4.37E-03 | 4.05E-02 | 5.4031  |
| TRIM27        | 1.7550  | 1.4844 | 8.1190 | 4.38E-03 | 4.06E-02 | 3.3753  |
| LINC01207     | -1.9331 | 5.3292 | 8.1157 | 4.39E-03 | 4.06E-02 | 0.2619  |
| TRIM23        | 2.8901  | 1.3765 | 8.1107 | 4.40E-03 | 4.07E-02 | 7.4131  |
| LINC00672     | 3.2152  | 3.2657 | 8.0992 | 4.43E-03 | 4.09E-02 | 9.2866  |
| GABRA3        | 1.8348  | 0.6336 | 8.0992 | 4.43E-03 | 4.09E-02 | 3.5671  |
| CDIP1         | -2.5628 | 1.7206 | 8.0986 | 4.43E-03 | 4.09E-02 | 0.1692  |
| SCUBE2        | 1.9831  | 0.7786 | 8.0963 | 4.44E-03 | 4.09E-02 | 3.9534  |
| GABRA4        | 1.9355  | 0.8133 | 8.0945 | 4.44E-03 | 4.09E-02 | 3.8250  |
| RP11-724N1.1  | 2.1196  | 1.3052 | 8.0907 | 4.45E-03 | 4.10E-02 | 4.3457  |
| WDR47         | -3.4707 | 1.4784 | 8.0881 | 4.46E-03 | 4.10E-02 | 0.0902  |
| NLRP9         | 1.8242  | 0.5390 | 8.0822 | 4.47E-03 | 4.11E-02 | 3.5411  |
| DPF3          | 3.6570  | 1.7124 | 8.0812 | 4.47E-03 | 4.11E-02 | 12.6146 |
| SLC7A1        | -2.8969 | 4.7118 | 8.0808 | 4.47E-03 | 4.11E-02 | 0.1343  |
| MTMR4         | -2.8350 | 2.3070 | 8.0712 | 4.50E-03 | 4.12E-02 | 0.1401  |
| YTHDF1        | -2.8385 | 4.1293 | 8.0698 | 4.50E-03 | 4.12E-02 | 0.1398  |
| GEN1*         | 2.4855  | 1.1685 | 8.0660 | 4.51E-03 | 4.13E-02 | 5.6003  |
| TXNRD1*       | -1.8167 | 8.0706 | 8.0595 | 4.53E-03 | 4.13E-02 | 0.2839  |
| BTBD3         | -2.6954 | 4.3068 | 8.0666 | 4.51E-03 | 4.13E-02 | 0.1544  |
| OLFM2         | 4.5849  | 1.2624 | 8.0638 | 4.52E-03 | 4.13E-02 | 23.9991 |

|               |         |        |        |          |          |         |
|---------------|---------|--------|--------|----------|----------|---------|
| DUOX2         | 1.8749  | 7.9996 | 8.0633 | 4.52E-03 | 4.13E-02 | 3.6677  |
| WDFY3         | 2.6648  | 1.9511 | 8.0597 | 4.53E-03 | 4.13E-02 | 6.3415  |
| ROR1          | 1.9645  | 0.7991 | 8.0590 | 4.53E-03 | 4.13E-02 | 3.9027  |
| ZNF226        | 2.5937  | 1.0547 | 8.0575 | 4.53E-03 | 4.13E-02 | 6.0364  |
| LPCAT2        | 3.3219  | 1.2513 | 8.0523 | 4.54E-03 | 4.13E-02 | 9.9996  |
| TIFA          | 3.6280  | 2.0967 | 8.0518 | 4.55E-03 | 4.13E-02 | 12.3630 |
| ADAP2         | 2.3120  | 0.8041 | 8.0441 | 4.57E-03 | 4.15E-02 | 4.9656  |
| ARL11         | 2.6264  | 1.4846 | 8.0390 | 4.58E-03 | 4.15E-02 | 6.1749  |
| UBA2          | 2.8021  | 2.6308 | 8.0385 | 4.58E-03 | 4.15E-02 | 6.9745  |
| ARRDC5        | 3.7745  | 1.5581 | 8.0384 | 4.58E-03 | 4.15E-02 | 13.6846 |
| TWISTNB       | 3.2338  | 1.0795 | 8.0342 | 4.59E-03 | 4.16E-02 | 9.4076  |
| ELK1          | 3.3411  | 2.1112 | 8.0262 | 4.61E-03 | 4.17E-02 | 10.1338 |
| SH2D4A        | 2.6427  | 1.6781 | 8.0251 | 4.61E-03 | 4.17E-02 | 6.2452  |
| PDAP1         | -3.1715 | 2.4704 | 8.0250 | 4.61E-03 | 4.17E-02 | 0.1110  |
| BNIP3P1       | 3.1883  | 1.1979 | 8.0166 | 4.64E-03 | 4.18E-02 | 9.1155  |
| SHFM1         | 2.3123  | 2.5547 | 8.0145 | 4.64E-03 | 4.19E-02 | 4.9667  |
| FAM230A       | 1.8100  | 0.5489 | 8.0023 | 4.67E-03 | 4.21E-02 | 3.5063  |
| HHIP          | 2.7370  | 1.9051 | 7.9989 | 4.68E-03 | 4.21E-02 | 6.6670  |
| TIMM10B       | -2.8489 | 3.6788 | 7.9971 | 4.69E-03 | 4.21E-02 | 0.1388  |
| FMN2          | -3.5088 | 2.3313 | 7.9971 | 4.69E-03 | 4.21E-02 | 0.0879  |
| DYNC1H1       | 2.5576  | 3.5503 | 7.9956 | 4.69E-03 | 4.21E-02 | 5.8871  |
| IL4R          | -2.7689 | 1.9872 | 7.9947 | 4.69E-03 | 4.21E-02 | 0.1467  |
| FBXL3         | 2.4592  | 3.4906 | 7.9931 | 4.70E-03 | 4.21E-02 | 5.4991  |
| ELP2          | 2.5534  | 1.2192 | 7.9909 | 4.70E-03 | 4.22E-02 | 5.8700  |
| GRIA3         | 1.9203  | 0.5820 | 7.9867 | 4.71E-03 | 4.22E-02 | 3.7851  |
| CHRNA3        | 1.8484  | 0.8130 | 7.9844 | 4.72E-03 | 4.22E-02 | 3.6010  |
| IP6K2         | 1.5991  | 6.3893 | 7.9807 | 4.73E-03 | 4.23E-02 | 3.0295  |
| NKTR          | 2.9756  | 2.2623 | 7.9803 | 4.73E-03 | 4.23E-02 | 7.8660  |
| TUBGCP3       | -3.3623 | 1.0057 | 7.9776 | 4.74E-03 | 4.23E-02 | 0.0972  |
| MYLIP         | -2.2615 | 6.3821 | 7.9734 | 4.75E-03 | 4.24E-02 | 0.2086  |
| NETO2         | 3.3044  | 1.2379 | 7.9700 | 4.76E-03 | 4.24E-02 | 9.8795  |
| LINC00910     | 2.4312  | 0.7627 | 7.9664 | 4.77E-03 | 4.24E-02 | 5.3936  |
| DCUN1D2       | -3.1868 | 3.0290 | 7.9661 | 4.77E-03 | 4.24E-02 | 0.1098  |
| RP11-654C22.1 | -4.3508 | 1.0916 | 7.9608 | 4.78E-03 | 4.25E-02 | 0.0490  |
| SARS          | -2.5860 | 2.8853 | 7.9594 | 4.78E-03 | 4.25E-02 | 0.1665  |
| HARS          | 1.8612  | 0.5640 | 7.9591 | 4.78E-03 | 4.25E-02 | 3.6330  |
| RFNG          | -2.4651 | 1.1914 | 7.9523 | 4.80E-03 | 4.26E-02 | 0.1811  |
| RHOG          | 2.2071  | 4.3149 | 7.9495 | 4.81E-03 | 4.26E-02 | 4.6175  |
| RNAHEH2B      | 3.5378  | 1.6550 | 7.9491 | 4.81E-03 | 4.26E-02 | 11.6143 |
| TMPRSS11E     | 2.6709  | 9.1632 | 7.9463 | 4.82E-03 | 4.27E-02 | 6.3684  |
| ST6GALNAC1    | -1.7773 | 4.2871 | 7.9405 | 4.83E-03 | 4.28E-02 | 0.2917  |



|               |         |        |        |          |          |         |
|---------------|---------|--------|--------|----------|----------|---------|
| AL109658.1    | 3.0767  | 1.4195 | 7.9361 | 4.85E-03 | 4.28E-02 | 8.4367  |
| RP11-613D13.8 | 1.9399  | 0.6817 | 7.9318 | 4.86E-03 | 4.29E-02 | 3.8369  |
| COMMD1        | -2.9362 | 0.9685 | 7.9253 | 4.87E-03 | 4.30E-02 | 0.1307  |
| RPH3AL        | 4.3672  | 1.5001 | 7.9201 | 4.89E-03 | 4.31E-02 | 20.6382 |
| CBFA2T3       | -3.0544 | 1.9054 | 7.9183 | 4.89E-03 | 4.31E-02 | 0.1204  |
| ABHD15        | 3.7555  | 1.6383 | 7.9171 | 4.90E-03 | 4.31E-02 | 13.5057 |
| WDR12         | 3.7306  | 2.3623 | 7.9137 | 4.91E-03 | 4.31E-02 | 13.2749 |
| GOPC          | -1.8691 | 4.7793 | 7.9137 | 4.91E-03 | 4.31E-02 | 0.2737  |
| RP11-490O6.2  | 1.9319  | 0.5808 | 7.9117 | 4.91E-03 | 4.31E-02 | 3.8155  |
| BLM           | 2.2401  | 0.8541 | 7.9108 | 4.91E-03 | 4.31E-02 | 4.7242  |
| RP11-464D20.6 | 2.7315  | 0.8881 | 7.9106 | 4.91E-03 | 4.31E-02 | 6.6414  |
| TCTN2         | 2.4623  | 1.0296 | 7.9068 | 4.92E-03 | 4.32E-02 | 5.5108  |
| CD109         | 1.8896  | 0.6908 | 7.9027 | 4.94E-03 | 4.32E-02 | 3.7053  |
| RP11-18H21.1  | 2.2529  | 0.7752 | 7.9016 | 4.94E-03 | 4.32E-02 | 4.7665  |
| SLC9A3R2      | -2.6434 | 0.8389 | 7.8983 | 4.95E-03 | 4.33E-02 | 0.1600  |
| TGIF2         | 2.5545  | 0.7918 | 7.8954 | 4.96E-03 | 4.33E-02 | 5.8746  |
| KIAA0907      | 2.3467  | 3.3704 | 7.8951 | 4.96E-03 | 4.33E-02 | 5.0867  |
| MGA           | 3.1931  | 1.7826 | 7.8924 | 4.96E-03 | 4.33E-02 | 9.1455  |
| POLR2I        | 3.6652  | 1.6227 | 7.8883 | 4.98E-03 | 4.34E-02 | 12.6865 |
| SCAI          | 2.6653  | 1.9456 | 7.8850 | 4.98E-03 | 4.34E-02 | 6.3436  |
| NTNG2         | 2.8953  | 1.2070 | 7.8836 | 4.99E-03 | 4.34E-02 | 7.4400  |
| RP11-390E23.6 | -2.8602 | 2.7054 | 7.8795 | 5.00E-03 | 4.35E-02 | 0.1377  |
| HOXC6         | 1.9334  | 0.6114 | 7.8751 | 5.01E-03 | 4.36E-02 | 3.8195  |
| RAI1          | 2.8015  | 1.1033 | 7.8669 | 5.03E-03 | 4.38E-02 | 6.9718  |
| CEP290        | 2.2126  | 0.6982 | 7.8605 | 5.05E-03 | 4.39E-02 | 4.6352  |
| NDUFS6        | -2.8806 | 2.8673 | 7.8575 | 5.06E-03 | 4.39E-02 | 0.1358  |
| SLC37A2       | -2.3959 | 1.0806 | 7.8547 | 5.07E-03 | 4.39E-02 | 0.1900  |
| SEMA3D        | 1.8870  | 0.6053 | 7.8486 | 5.09E-03 | 4.41E-02 | 3.6986  |
| NTN4          | 2.5208  | 1.4846 | 7.8406 | 5.11E-03 | 4.42E-02 | 5.7391  |
| SRRT          | -2.9790 | 2.7547 | 7.8365 | 5.12E-03 | 4.43E-02 | 0.1268  |
| RANBP9        | -2.0947 | 3.0037 | 7.8323 | 5.13E-03 | 4.43E-02 | 0.2341  |
| SCGB2A2       | 1.9068  | 0.6677 | 7.8304 | 5.14E-03 | 4.43E-02 | 3.7497  |
| AKIP1         | -4.0015 | 1.1385 | 7.8297 | 5.14E-03 | 4.43E-02 | 0.0624  |
| MYLK3         | 3.3071  | 1.4318 | 7.8294 | 5.14E-03 | 4.43E-02 | 9.8981  |
| SESN3         | -2.7793 | 5.0291 | 7.8278 | 5.14E-03 | 4.43E-02 | 0.1457  |
| WDR66         | 2.4678  | 2.5275 | 7.8238 | 5.16E-03 | 4.44E-02 | 5.5320  |
| GRIN2B*       | 3.1569  | 1.6430 | 7.8173 | 5.17E-03 | 4.45E-02 | 8.9193  |
| PLXNB2        | 2.1160  | 3.3324 | 7.8169 | 5.18E-03 | 4.45E-02 | 4.3349  |
| C18orf61      | 2.4102  | 1.2705 | 7.8147 | 5.18E-03 | 4.45E-02 | 5.3155  |
| LRMP          | -3.5483 | 1.2876 | 7.8140 | 5.18E-03 | 4.45E-02 | 0.0855  |
| HCLS1         | 2.4797  | 1.0835 | 7.8130 | 5.19E-03 | 4.45E-02 | 5.5777  |

|               |         |        |        |          |          |         |
|---------------|---------|--------|--------|----------|----------|---------|
| METTL6        | 3.6616  | 2.0227 | 7.8124 | 5.19E-03 | 4.45E-02 | 12.6551 |
| ZGRF1         | 4.2580  | 1.5850 | 7.8117 | 5.19E-03 | 4.45E-02 | 19.1335 |
| AGMO          | 2.8781  | 1.0217 | 7.7978 | 5.23E-03 | 4.48E-02 | 7.3520  |
| SCFD1         | 2.2925  | 2.3854 | 7.7957 | 5.24E-03 | 4.48E-02 | 4.8989  |
| FAM171A1      | 3.2259  | 2.3652 | 7.7949 | 5.24E-03 | 4.48E-02 | 9.3559  |
| C10orf10      | -2.2335 | 4.6274 | 7.7949 | 5.24E-03 | 4.48E-02 | 0.2126  |
| COPS7A        | -2.8300 | 2.0263 | 7.7788 | 5.29E-03 | 4.51E-02 | 0.1406  |
| RSBN1L        | -2.1537 | 5.0195 | 7.7756 | 5.30E-03 | 4.52E-02 | 0.2247  |
| PROX1-AS1     | 2.6409  | 1.1147 | 7.7747 | 5.30E-03 | 4.52E-02 | 6.2370  |
| AC093391.2    | 3.2998  | 1.7026 | 7.7720 | 5.31E-03 | 4.52E-02 | 9.8477  |
| USP49         | 2.0479  | 0.7537 | 7.7564 | 5.35E-03 | 4.56E-02 | 4.1351  |
| OR52N5        | 5.5908  | 1.7892 | 7.7539 | 5.36E-03 | 4.56E-02 | 48.1940 |
| TM4SF1-AS1    | -2.3806 | 0.7130 | 7.7519 | 5.37E-03 | 4.56E-02 | 0.1920  |
| UTP11L        | -3.7436 | 1.6821 | 7.7518 | 5.37E-03 | 4.56E-02 | 0.0747  |
| RP11-372E1.6  | 2.5956  | 0.9283 | 7.7432 | 5.39E-03 | 4.57E-02 | 6.0443  |
| CCPG1         | 2.1612  | 2.3929 | 7.7385 | 5.41E-03 | 4.58E-02 | 4.4728  |
| NDE1          | 3.0041  | 1.5811 | 7.7336 | 5.42E-03 | 4.59E-02 | 8.0226  |
| NFYB          | -2.6868 | 2.9279 | 7.7316 | 5.43E-03 | 4.59E-02 | 0.1553  |
| CLP1          | -4.2308 | 1.0909 | 7.7274 | 5.44E-03 | 4.60E-02 | 0.0533  |
| TEX10         | 4.6869  | 1.2680 | 7.7198 | 5.46E-03 | 4.62E-02 | 25.7571 |
| FTSJ1         | -1.9285 | 0.5692 | 7.7104 | 5.49E-03 | 4.64E-02 | 0.2627  |
| BCAS4         | 3.0492  | 1.7141 | 7.7053 | 5.51E-03 | 4.65E-02 | 8.2777  |
| RP11-154D6.2  | 2.3665  | 1.9062 | 7.6949 | 5.54E-03 | 4.67E-02 | 5.1567  |
| ACADVL        | -2.0349 | 2.8627 | 7.6896 | 5.55E-03 | 4.68E-02 | 0.2440  |
| NME7          | 1.8195  | 0.7351 | 7.6856 | 5.57E-03 | 4.69E-02 | 3.5296  |
| KBTBD11       | -2.8003 | 1.3681 | 7.6806 | 5.58E-03 | 4.70E-02 | 0.1436  |
| RPGRIP1L      | 2.7644  | 1.1255 | 7.6774 | 5.59E-03 | 4.70E-02 | 6.7946  |
| LONP1         | 2.6305  | 1.3545 | 7.6697 | 5.62E-03 | 4.72E-02 | 6.1924  |
| NSD1          | 2.8645  | 1.0804 | 7.6684 | 5.62E-03 | 4.72E-02 | 7.2831  |
| GRPEL1        | -1.5853 | 0.8258 | 7.6661 | 5.63E-03 | 4.72E-02 | 0.3333  |
| PPP1R14D      | -1.8689 | 4.2434 | 7.6642 | 5.63E-03 | 4.72E-02 | 0.2738  |
| RP11-102K13.5 | 1.7379  | 0.7295 | 7.6636 | 5.63E-03 | 4.72E-02 | 3.3355  |
| RAPGEF1       | -2.0390 | 2.3350 | 7.6631 | 5.64E-03 | 4.72E-02 | 0.2433  |
| GPR183        | -4.2503 | 1.0076 | 7.6611 | 5.64E-03 | 4.72E-02 | 0.0525  |
| OGFOD1        | 1.9572  | 0.7710 | 7.6572 | 5.65E-03 | 4.73E-02 | 3.8831  |
| KIAA2018      | 2.0785  | 3.0776 | 7.6540 | 5.66E-03 | 4.73E-02 | 4.2238  |
| FAM159B       | 3.4390  | 1.2672 | 7.6505 | 5.68E-03 | 4.74E-02 | 10.8454 |
| TTC7A         | -2.7902 | 3.5460 | 7.6488 | 5.68E-03 | 4.74E-02 | 0.1446  |
| RP1-90J20.11  | 2.3907  | 0.8268 | 7.6483 | 5.68E-03 | 4.74E-02 | 5.2441  |
| PROX1*        | 2.7916  | 2.3350 | 7.6436 | 5.70E-03 | 4.75E-02 | 6.9239  |
| ALG9          | 3.0669  | 1.3806 | 7.6429 | 5.70E-03 | 4.75E-02 | 8.3797  |

|              |         |        |        |          |          |         |
|--------------|---------|--------|--------|----------|----------|---------|
| ADIPOR2*     | -1.8314 | 8.3881 | 7.6398 | 5.71E-03 | 4.75E-02 | 0.2810  |
| PPP2R5C      | 1.7472  | 7.8956 | 7.6394 | 5.71E-03 | 4.75E-02 | 3.3570  |
| LINC01268    | 3.0760  | 0.9308 | 7.6368 | 5.72E-03 | 4.75E-02 | 8.4329  |
| RP11-505P4.6 | 1.7914  | 0.6795 | 7.6345 | 5.73E-03 | 4.75E-02 | 3.4615  |
| RP11-411K7.1 | 1.7974  | 0.6810 | 7.6343 | 5.73E-03 | 4.75E-02 | 3.4758  |
| ME2          | -1.7824 | 4.2456 | 7.6335 | 5.73E-03 | 4.75E-02 | 0.2907  |
| NLRP3        | 3.0961  | 1.3306 | 7.6335 | 5.73E-03 | 4.75E-02 | 8.5507  |
| RNF217       | 3.3578  | 1.1180 | 7.6322 | 5.73E-03 | 4.75E-02 | 10.2521 |
| PIK3R5       | 2.7210  | 0.8928 | 7.6282 | 5.75E-03 | 4.75E-02 | 6.5935  |
| PRCP         | 2.6810  | 1.6412 | 7.6254 | 5.76E-03 | 4.76E-02 | 6.4130  |
| SCNN1B       | -2.5534 | 2.1324 | 7.6230 | 5.76E-03 | 4.76E-02 | 0.1704  |
| PRR14L       | 1.9019  | 1.5713 | 7.6227 | 5.76E-03 | 4.76E-02 | 3.7371  |
| MIR7-3HG     | 2.7344  | 0.8662 | 7.6127 | 5.80E-03 | 4.78E-02 | 6.6549  |
| HNRNPA1P54   | 2.4581  | 3.1584 | 7.6078 | 5.81E-03 | 4.79E-02 | 5.4948  |
| NUDT14       | -2.5972 | 2.1540 | 7.6065 | 5.82E-03 | 4.79E-02 | 0.1653  |
| PAPPA        | 2.7247  | 0.8692 | 7.5964 | 5.85E-03 | 4.81E-02 | 6.6103  |
| SNAPC5       | -3.1022 | 1.5164 | 7.5932 | 5.86E-03 | 4.82E-02 | 0.1164  |
| MTA3         | -2.1490 | 3.8641 | 7.5851 | 5.89E-03 | 4.84E-02 | 0.2255  |
| HSPE1        | 2.2327  | 1.8372 | 7.5839 | 5.89E-03 | 4.84E-02 | 4.7002  |
| LGALS2       | -2.5512 | 2.4067 | 7.5734 | 5.92E-03 | 4.86E-02 | 0.1706  |
| CHSY1        | 2.8092  | 1.6404 | 7.5733 | 5.92E-03 | 4.86E-02 | 7.0090  |
| RALYL        | 2.3838  | 1.7068 | 7.5709 | 5.93E-03 | 4.86E-02 | 5.2190  |
| HGSNAT       | -2.9703 | 1.9167 | 7.5707 | 5.93E-03 | 4.86E-02 | 0.1276  |
| EPHA1        | 3.3555  | 1.1399 | 7.5700 | 5.93E-03 | 4.86E-02 | 10.2356 |
| XRCC5        | 2.2058  | 7.2278 | 7.5664 | 5.95E-03 | 4.86E-02 | 4.6134  |
| RP11-88H9.2  | 2.4661  | 1.3761 | 7.5661 | 5.95E-03 | 4.86E-02 | 5.5255  |
| TANC2        | 3.1862  | 1.3840 | 7.5617 | 5.96E-03 | 4.87E-02 | 9.1022  |
| BLNK         | 3.4393  | 1.2914 | 7.5606 | 5.97E-03 | 4.87E-02 | 10.8474 |
| RNF130       | 2.4451  | 2.7765 | 7.5601 | 5.97E-03 | 4.87E-02 | 5.4455  |
| ANKMY1       | 2.9386  | 1.1299 | 7.5550 | 5.98E-03 | 4.88E-02 | 7.6669  |
| PDLIM3       | 2.7538  | 1.9371 | 7.5529 | 5.99E-03 | 4.88E-02 | 6.7449  |
| TFAM         | 2.6319  | 2.6320 | 7.5504 | 6.00E-03 | 4.88E-02 | 6.1983  |
| EFCAB2       | 1.8848  | 0.5963 | 7.5472 | 6.01E-03 | 4.89E-02 | 3.6931  |
| RPS6KC1      | 2.9469  | 1.1044 | 7.5384 | 6.04E-03 | 4.91E-02 | 7.7106  |
| ASPN         | 1.7863  | 0.6843 | 7.5369 | 6.04E-03 | 4.91E-02 | 3.4493  |
| QPRT         | 3.3668  | 2.9325 | 7.5365 | 6.05E-03 | 4.91E-02 | 10.3161 |
| LYRM9        | 2.0259  | 0.7172 | 7.5355 | 6.05E-03 | 4.91E-02 | 4.0725  |
| DHX29        | -3.5864 | 1.7157 | 7.5338 | 6.06E-03 | 4.91E-02 | 0.0832  |
| AC079354.3   | 4.3843  | 2.8206 | 7.5333 | 6.06E-03 | 4.91E-02 | 20.8839 |
| MAPK13       | -1.9490 | 4.2136 | 7.5311 | 6.06E-03 | 4.91E-02 | 0.2590  |
| STYXL1       | -2.9140 | 1.2953 | 7.5287 | 6.07E-03 | 4.91E-02 | 0.1327  |

|               |         |        |        |          |          |         |
|---------------|---------|--------|--------|----------|----------|---------|
| RGS22         | 3.1636  | 1.0825 | 7.5272 | 6.08E-03 | 4.91E-02 | 8.9604  |
| POLR3A        | 2.4930  | 0.7940 | 7.5266 | 6.08E-03 | 4.91E-02 | 5.6294  |
| ARHGEF7       | -2.3230 | 1.9358 | 7.5195 | 6.10E-03 | 4.93E-02 | 0.1999  |
| CR1           | 2.7911  | 0.9015 | 7.5166 | 6.11E-03 | 4.93E-02 | 6.9213  |
| MAD2L1        | 3.1089  | 1.3865 | 7.5151 | 6.12E-03 | 4.93E-02 | 8.6270  |
| RAB21         | 1.6344  | 6.7634 | 7.5147 | 6.12E-03 | 4.93E-02 | 3.1047  |
| MRPS33        | -1.9845 | 0.6951 | 7.5134 | 6.12E-03 | 4.93E-02 | 0.2527  |
| KIAA1244      | -2.2990 | 1.8745 | 7.5101 | 6.14E-03 | 4.93E-02 | 0.2032  |
| SLC30A8       | 2.7319  | 1.0276 | 7.5036 | 6.16E-03 | 4.95E-02 | 6.6433  |
| NUP205        | -3.0068 | 1.5480 | 7.5008 | 6.17E-03 | 4.95E-02 | 0.1244  |
| ZNF530        | 1.7085  | 0.5546 | 7.4960 | 6.18E-03 | 4.96E-02 | 3.2683  |
| SERPINB7      | 4.0489  | 1.4905 | 7.4958 | 6.18E-03 | 4.96E-02 | 16.5515 |
| PAIP1         | 2.3757  | 1.3519 | 7.4933 | 6.19E-03 | 4.96E-02 | 5.1899  |
| RP11-486P11.1 | 3.4195  | 0.9266 | 7.4913 | 6.20E-03 | 4.97E-02 | 10.6996 |
| PLA2G7        | 2.6464  | 0.8385 | 7.4883 | 6.21E-03 | 4.97E-02 | 6.2610  |
| SAMD12        | 2.8942  | 2.9396 | 7.4865 | 6.22E-03 | 4.97E-02 | 7.4341  |
| RP11-14I17.2  | 3.5847  | 1.0550 | 7.4858 | 6.22E-03 | 4.97E-02 | 11.9980 |
| CARS          | -2.6969 | 1.2341 | 7.4838 | 6.23E-03 | 4.97E-02 | 0.1542  |
| RP11-542K23.7 | 3.2762  | 1.0910 | 7.4832 | 6.23E-03 | 4.97E-02 | 9.6882  |
| RASA2-IT1     | 2.1743  | 0.6408 | 7.4779 | 6.25E-03 | 4.98E-02 | 4.5135  |
| TNKS2         | -1.7505 | 7.0657 | 7.4733 | 6.26E-03 | 4.99E-02 | 0.2972  |

**Table S5. Top 500 Single-Gene LDA Classifiers.** The top 500 single-gene linear discriminant analysis classifiers and their respective misclassification rate in flaxseed lignan supplement vs placebo treatment in all samples regardless of the ENL phenotype.

| Gene    | bresub<br>error | Gene     | bresub<br>error | Gene      | bresub<br>error | Gene    | bresub<br>error |
|---------|-----------------|----------|-----------------|-----------|-----------------|---------|-----------------|
| PROX1   | 0.2845          | F11R     | 0.3842          | CASP3     | 0.4032          | CTDSPL  | 0.4194          |
| WNT5A   | 0.2913          | EPHB1    | 0.3853          | SLC7A7    | 0.4043          | KDM4C   | 0.4200          |
| KCTD12  | 0.3089          | PSME2    | 0.3864          | RHOB      | 0.4044          | PRKCI   | 0.4200          |
| TLR2    | 0.3172          | IGF2BP1  | 0.3872          | GEMIN6    | 0.4052          | CAV1    | 0.4204          |
| REL     | 0.3278          | SERPINA1 | 0.3881          | ATF4      | 0.4062          | RBL2    | 0.4206          |
| FOXO3   | 0.3373          | KLF4     | 0.3883          | SPRY2     | 0.4062          | S100A9  | 0.4211          |
| SPDEF   | 0.3377          | HRH1     | 0.3885          | FGFR3     | 0.4069          | CDK8    | 0.4214          |
| PTCH1   | 0.3437          | SLCO2A1  | 0.3892          | EPHB4     | 0.4071          | AGPAT3  | 0.4214          |
| GADD45B | 0.3465          | PYGO2    | 0.3893          | TSTA3     | 0.4080          | BCL2L2  | 0.4215          |
| TRAFD1  | 0.3478          | SLC30A4  | 0.3897          | SORD      | 0.4081          | DDR2    | 0.4221          |
| CDH5    | 0.3512          | DUOX2    | 0.3900          | ACAT1     | 0.4085          | CLDN3   | 0.4222          |
| TJP3    | 0.3561          | NEUROD1  | 0.3912          | HOPX      | 0.4090          | SLC30A5 | 0.4222          |
| FGFR1   | 0.3609          | TNFRSF21 | 0.3921          | EPAS1     | 0.4094          | REG1A   | 0.4223          |
| MAML1   | 0.3626          | BMPR2    | 0.3921          | REST      | 0.4095          | NOS2    | 0.4225          |
| FAM129A | 0.3660          | SLC5A11  | 0.3927          | HMOX1     | 0.4098          | RAD52   | 0.4227          |
| HES1    | 0.3667          | ELP3     | 0.3929          | JAK2      | 0.4098          | SPPL3   | 0.4228          |
| PTPN22  | 0.3673          | XRCC6    | 0.3930          | TDG       | 0.4100          | TFAP2C  | 0.4233          |
| MAPK8   | 0.3677          | FUT2     | 0.3932          | SLC7A6    | 0.4101          | NPAT    | 0.4234          |
| VDR     | 0.3680          | P4HB     | 0.3942          | PDE6D     | 0.4103          | SLC9A2  | 0.4242          |
| BMP4    | 0.3700          | PLA2G10  | 0.3944          | FOXD2     | 0.4104          | AXIN1   | 0.4242          |
| PECAM1  | 0.3702          | TFRC     | 0.3944          | ACSL4     | 0.4110          | SLC2A13 | 0.4246          |
| APC     | 0.3709          | FGF18    | 0.3948          | TNFRSF10D | 0.4115          | ADRB1   | 0.4252          |
| DOT1L   | 0.3716          | BST1     | 0.3953          | SLC50A1   | 0.4126          | TP53    | 0.4253          |
| HOXA10  | 0.3718          | ITLN1    | 0.3955          | BMI1      | 0.4134          | HOXA13  | 0.4257          |
| PCNA    | 0.3754          | IL13RA1  | 0.3956          | BRD2      | 0.4140          | TLR4    | 0.4259          |
| PAX6    | 0.3756          | IL6ST    | 0.3957          | SLC20A1   | 0.4150          | SHH     | 0.4259          |
| IL18    | 0.3764          | TTN      | 0.3957          | SLC4A4    | 0.4153          | MAPK6   | 0.4260          |
| SLC39A7 | 0.3777          | RUNX2    | 0.3970          | SLC28A1   | 0.4157          | APOA1   | 0.4262          |
| TJP1    | 0.3789          | NCAM1    | 0.3972          | PPARGC1A  | 0.4164          | WNT2B   | 0.4264          |
| WNT7A   | 0.3793          | DEFA5    | 0.3996          | SOD2      | 0.4171          | PKN2    | 0.4264          |
| COX4I1  | 0.3799          | MYB      | 0.4000          | SREBF2    | 0.4180          | LIG3    | 0.4265          |
| RELB    | 0.3801          | NOTCH3   | 0.4013          | STAT3     | 0.4188          | TGFB2   | 0.4270          |
| TNK2    | 0.3816          | PODXL    | 0.4015          | CCL15     | 0.4192          | CXCL2   | 0.4272          |
| GSTM3   | 0.3827          | PIWIL2   | 0.4027          | GREM1     | 0.4192          | SLC35A2 | 0.4276          |
| MYO9B   | 0.3833          | CA13     | 0.4030          | PRKDC     | 0.4193          | ADAM10  | 0.4280          |

| Gene     | bresub<br>error | Gene      | bresub<br>error | Gene    | bresub<br>error | Gene     | bresub<br>error |
|----------|-----------------|-----------|-----------------|---------|-----------------|----------|-----------------|
| CA3      | 0.4296          | MFSD2A    | 0.4420          | MGST1   | 0.4479          | PRKCB    | 0.4556          |
| HOXD10   | 0.4296          | CA1       | 0.4422          | TNFAIP1 | 0.4480          | SLC3A1   | 0.4557          |
| CXCL16   | 0.4297          | MLLT4     | 0.4429          | CYP4F2  | 0.4486          | SLC6A6   | 0.4558          |
| SLC5A8   | 0.4297          | MUC17     | 0.4429          | PARK7   | 0.4487          | LAMA1    | 0.4558          |
| ELF3     | 0.4297          | SLC7A11   | 0.4429          | HOXD13  | 0.4489          | FOXC1    | 0.4559          |
| AQP11    | 0.4298          | GDF15     | 0.4433          | TJP2    | 0.4489          | IFNAR1   | 0.4560          |
| TNFRSF1A | 0.4301          | RB1       | 0.4433          | PLCD3   | 0.4490          | SLC38A2  | 0.4563          |
| PIK3CA   | 0.4302          | BMF       | 0.4434          | EPHB6   | 0.4491          | IGF1R    | 0.4566          |
| TFCP2L1  | 0.4309          | GSN       | 0.4440          | BCL2L13 | 0.4492          | ATG16L1  | 0.4569          |
| MAPK13   | 0.4316          | RAC1      | 0.4440          | PTGIR   | 0.4492          | PPM1D    | 0.4570          |
| MSH3     | 0.4320          | YWHAB     | 0.4441          | CD59    | 0.4493          | PAWR     | 0.4570          |
| CA14     | 0.4325          | BCL2      | 0.4443          | FASLG   | 0.4494          | PTPN6    | 0.4575          |
| TYRO3    | 0.4325          | BCO2      | 0.4444          | FABP6   | 0.4495          | FFAR4    | 0.4582          |
| ICAM1    | 0.4327          | XIST      | 0.4444          | IRF8    | 0.4498          | SOCS6    | 0.4584          |
| FOXP2    | 0.4334          | FABP3     | 0.4444          | NTS     | 0.4498          | REG3A    | 0.4585          |
| NOTCH1   | 0.4335          | TNFRSF10A | 0.4444          | SLC31A1 | 0.4500          | ABCG2    | 0.4587          |
| CAMK2B   | 0.4342          | TNFRSF11A | 0.4444          | MAPK10  | 0.4500          | MYC      | 0.4589          |
| EGF      | 0.4342          | COX5B     | 0.4445          | SMAD7   | 0.4500          | PLA2G4B  | 0.4590          |
| THRA     | 0.4343          | RBPJ      | 0.4445          | AQP7    | 0.4509          | SLC25A28 | 0.4591          |
| MEIS1    | 0.4365          | KDM4B     | 0.4446          | ITGAM   | 0.4511          | SAT2     | 0.4593          |
| NRIP1    | 0.4368          | PRKCE     | 0.4446          | KIT     | 0.4512          | COMMD3   | 0.4595          |
| HPGD     | 0.4370          | RELA      | 0.4446          | CTNNA1  | 0.4514          | GUCA2B   | 0.4597          |
| CDK2     | 0.4375          | TCF4      | 0.4446          | HMGBR   | 0.4514          | MELK     | 0.4599          |
| ID1      | 0.4380          | REG4      | 0.4447          | POU2F3  | 0.4514          | ENC1     | 0.4602          |
| SLC10A2  | 0.4380          | ITGB1     | 0.4448          | GJC1    | 0.4517          | NUMB     | 0.4604          |
| CAT      | 0.4381          | HSD17B2   | 0.4454          | ADAM17  | 0.4523          | IL2RG    | 0.4607          |
| GCNT3    | 0.4382          | IL1B      | 0.4456          | FOS     | 0.4523          | MSH6     | 0.4608          |
| ACADS    | 0.4382          | ISL1      | 0.4458          | FZD7    | 0.4524          | MAP2K2   | 0.4609          |
| HSPA1B   | 0.4383          | FOXA3     | 0.4458          | PLCB2   | 0.4533          | RAD51D   | 0.4609          |
| MGAT3    | 0.4394          | ACKR2     | 0.4460          | TNF     | 0.4537          | HIST3H3  | 0.4609          |
| DEFA6    | 0.4395          | SLC23A3   | 0.4460          | LRIG1   | 0.4538          | ID3      | 0.4610          |
| CDCP1    | 0.4396          | TGM4      | 0.4460          | DPYSL3  | 0.4539          | SEPTIN4  | 0.4610          |
| CA7      | 0.4401          | NFKB1     | 0.4461          | HOXB7   | 0.4542          | DNAJB6   | 0.4612          |
| TGFA     | 0.4404          | PDK1      | 0.4463          | CDK2AP1 | 0.4544          | PLAU     | 0.4613          |
| SAR1B    | 0.4409          | COL6A3    | 0.4470          | PRKCD   | 0.4546          | PLCB4    | 0.4616          |
| ILKAP    | 0.4411          | FOXK2     | 0.4470          | SLC39A9 | 0.4546          | ECM1     | 0.4618          |
| MPC1     | 0.4416          | PDE4C     | 0.4471          | DPP4    | 0.4552          | SLC5A1   | 0.4618          |
| AIFM2    | 0.4417          | SLC16A3   | 0.4475          | ATOH1   | 0.4553          | FLT1     | 0.4619          |

| Gene     | bresub<br>error | Gene   | bresub<br>error | Gene     | bresub<br>error | Gene     | bresub<br>error |
|----------|-----------------|--------|-----------------|----------|-----------------|----------|-----------------|
| C11orf30 | 0.4621          | CXCL3  | 0.4630          | RPS4X    | 0.4630          | DDIT4    | 0.4630          |
| CACNA2D1 | 0.4621          | DAPK2  | 0.4630          | SDC1     | 0.4630          | FDFT1    | 0.4630          |
| PCDH7    | 0.4622          | DBN1   | 0.4630          | SERPINH1 | 0.4630          | FGF9     | 0.4630          |
| BMP2     | 0.4623          | DHRS9  | 0.4630          | SLC39A8  | 0.4630          | FTH1     | 0.4630          |
| ID4      | 0.4624          | DLL4   | 0.4630          | SLC3A2   | 0.4630          | GADD45A  | 0.4630          |
| LGALS3   | 0.4624          | EGFR   | 0.4630          | TP63     | 0.4630          | GSTA1    | 0.4630          |
| FOXO1    | 0.4624          | FABP2  | 0.4630          | TPT1     | 0.4630          | HMGB1    | 0.4630          |
| GSR      | 0.4624          | FASN   | 0.4630          | TREH     | 0.4630          | HNRNPA1  | 0.4630          |
| HOXB6    | 0.4625          | FGF5   | 0.4630          | UHRF1    | 0.4630          | HOXA9    | 0.4630          |
| SMAD3    | 0.4625          | HAS2   | 0.4630          | VNN1     | 0.4630          | HOXC8    | 0.4630          |
| LMNB2    | 0.4626          | HEY1   | 0.4630          | WLS      | 0.4630          | IL22RA1  | 0.4630          |
| SIRT1    | 0.4626          | HNF4A  | 0.4630          | YWHAZ    | 0.4630          | IL2RB    | 0.4630          |
| LPAR4    | 0.4627          | HRAS   | 0.4630          | ZEB2     | 0.4630          | IL4R     | 0.4630          |
| SLC1A4   | 0.4627          | HSPD1  | 0.4630          | ALOX15   | 0.4630          | ILF3     | 0.4630          |
| TCN2     | 0.4627          | IHH    | 0.4630          | ALPI     | 0.4630          | KDM5A    | 0.4630          |
| SLC25A39 | 0.4628          | IL1A   | 0.4630          | AMPD3    | 0.4630          | LAMC2    | 0.4630          |
| YWHAH    | 0.4628          | JUN    | 0.4630          | APOC3    | 0.4630          | LCT      | 0.4630          |
| KLK6     | 0.4629          | KCNS3  | 0.4630          | AQP3     | 0.4630          | LGALS3BP | 0.4630          |
| PPARG    | 0.4629          | KLK1   | 0.4630          | ARRB2    | 0.4630          | LGR4     | 0.4630          |
| ATG5     | 0.4629          | LAMB1  | 0.4630          | AXIN2    | 0.4630          | LTBP1    | 0.4630          |
| CD44     | 0.4629          | LATS2  | 0.4630          | BCL10    | 0.4630          | MAML3    | 0.4630          |
| ESR1     | 0.4629          | LPAR1  | 0.4630          | BRAF     | 0.4630          | MET      | 0.4630          |
| HOXA5    | 0.4629          | LYPLA1 | 0.4630          | CA2      | 0.4630          | MMP9     | 0.4630          |
| PTBP1    | 0.4629          | MEF2C  | 0.4630          | CACNB2   | 0.4630          | MPC2     | 0.4630          |
| ACTB     | 0.4630          | MSI1   | 0.4630          | CBX5     | 0.4630          | MUC3A    | 0.4630          |
| ALDH1A1  | 0.4630          | MUC2   | 0.4630          | CCL28    | 0.4630          | NAIP     | 0.4630          |
| APP      | 0.4630          | MUC4   | 0.4630          | CDCA7    | 0.4630          | NOG      | 0.4630          |
| AQP8     | 0.4630          | NEU3   | 0.4630          | CDK15    | 0.4630          | NUPR1    | 0.4630          |
| BACH1    | 0.4630          | NOTCH4 | 0.4630          | CDK7     | 0.4630          | PDE4A    | 0.4630          |
| BCL2L1   | 0.4630          | OCLN   | 0.4630          | CDKN2A   | 0.4630          | PLIN2    | 0.4630          |
| CD9      | 0.4630          | PDE4D  | 0.4630          | CDX1     | 0.4630          | POLG     | 0.4630          |
| CDC42    | 0.4630          | PLCG2  | 0.4630          | CEACAM1  | 0.4630          | PRKAR1A  | 0.4630          |
| CDH2     | 0.4630          | PPARD  | 0.4630          | CEACAM5  | 0.4630          | PROM2    | 0.4630          |
| CDKN1A   | 0.4630          | PRKACB | 0.4630          | CEBPB    | 0.4630          | RBBP9    | 0.4630          |
| CLDN8    | 0.4630          | PRSS23 | 0.4630          | CYB5R1   | 0.4630          | SIGIRR   | 0.4630          |
| COL3A1   | 0.4630          | PTGFRN | 0.4630          | CYBB     | 0.4630          | SLC16A1  | 0.4630          |
| CSPG5    | 0.4630          | PTPN2  | 0.4630          | CYP4F3   | 0.4630          | SLC22A23 | 0.4630          |
| CTNND1   | 0.4630          | RBL1   | 0.4630          | DAPK3    | 0.4630          | SLC25A37 | 0.4630          |

| Gene    | bresub<br>error | Gene    | bresub<br>error | Gene    | bresub<br>error | Gene     | bresub<br>error |
|---------|-----------------|---------|-----------------|---------|-----------------|----------|-----------------|
| SLC44A3 | 0.4630          | TSC2    | 0.4630          | SLC40A1 | 0.4634          | SLC35A3  | 0.4645          |
| SLC51B  | 0.4630          | ULK1    | 0.4630          | SLC44A1 | 0.4634          | SLC6A19  | 0.4645          |
| SLC5A3  | 0.4630          | VIL1    | 0.4630          | MSH2    | 0.4634          | HIF3A    | 0.4645          |
| SLC7A9  | 0.4630          | WNT3    | 0.4630          | BAD     | 0.4635          | HMGCS2   | 0.4645          |
| SP1     | 0.4630          | ZBTB33  | 0.4630          | FGFR2   | 0.4635          | MAB21L2  | 0.4645          |
| SQSTM1  | 0.4630          | HDAC2   | 0.4631          | ERBB2   | 0.4636          | MEN1     | 0.4645          |
| STK11   | 0.4630          | ICK     | 0.4631          | KLF6    | 0.4637          | SLC37A4  | 0.4646          |
| TAT     | 0.4630          | INSR    | 0.4631          | MEP1A   | 0.4638          | SLC4A7   | 0.4646          |
| TAZ     | 0.4630          | POR     | 0.4631          | PTPRD   | 0.4638          | MALL     | 0.4647          |
| THBS1   | 0.4630          | CDC25B  | 0.4631          | FSTL1   | 0.4639          | CEACAM19 | 0.4648          |
| TNFAIP3 | 0.4630          | SLC17A5 | 0.4632          | HOXB5   | 0.4641          | GNL1     | 0.4648          |
| TNFSF10 | 0.4630          | SOX9    | 0.4632          | MACC1   | 0.4643          | SLC28A2  | 0.4649          |
| TPM3    | 0.4630          | TLR5    | 0.4632          | HAS3    | 0.4644          | FLNB     | 0.4650          |
| TRIM31  | 0.4630          | GSS     | 0.4633          | POLB    | 0.4645          | IGFBP3   | 0.4650          |



**Table S6. Top 500 Two-Gene LDA Classifiers.** The top 500 two-gene linear discriminant analysis classifiers and their respective misclassification rate in flaxseed lignan supplement vs placebo treatment in all samples regardless of their ENL phenotype.

| Gene 1 | Gene 2    | bresub error | Gene 1   | Gene 2    | bresub error |
|--------|-----------|--------------|----------|-----------|--------------|
| NIFK   | PROX1     | 0.2140       | SLC4A4   | TNK2      | 0.2363       |
| KCTD12 | TNK2      | 0.2157       | CA14     | TDG       | 0.2363       |
| BMP4   | PROX1     | 0.2183       | SLC5A11  | TNFRSF10D | 0.2367       |
| NR6A1  | PROX1     | 0.2191       | CSPG5    | TDG       | 0.2368       |
| KCTD12 | NOS2      | 0.2230       | MAML1    | SREBF2    | 0.2368       |
| KCTD12 | TNFRSF10D | 0.2232       | RASSF1   | TDG       | 0.2369       |
| KCTD12 | SLC7A7    | 0.2237       | HOXA10   | TNK2      | 0.2370       |
| KCTD12 | SLCO2A1   | 0.2249       | DDR2     | PROX1     | 0.2373       |
| KCTD12 | TDG       | 0.2252       | TBRG1    | SLCO2A1   | 0.2374       |
| FOXD2  | KCTD12    | 0.2258       | MAPK7    | SLCO2A1   | 0.2374       |
| KCTD12 | PDE6D     | 0.2263       | BMP4     | PRKCH     | 0.2374       |
| PRKCH  | PROX1     | 0.2264       | HOXA10   | MAML1     | 0.2376       |
| CHI3L1 | NR6A1     | 0.2268       | CASP3    | KCTD12    | 0.2378       |
| DDX11  | PROX1     | 0.2273       | MYC      | TDG       | 0.2379       |
| KCTD12 | PCNA      | 0.2283       | NOTCH4   | XRCC6     | 0.2379       |
| MAML1  | XRCC6     | 0.2290       | RBL1     | XRCC6     | 0.2379       |
| MAML1  | SPDEF     | 0.2314       | MYO9B    | SLC4A4    | 0.2382       |
| CHI3L1 | PROX1     | 0.2317       | ALOX15   | XRCC6     | 0.2383       |
| NR6A1  | WNT5A     | 0.2318       | ADAM17   | SLCO2A1   | 0.2385       |
| TNK2   | XRCC6     | 0.2319       | SLC25A13 | TDG       | 0.2386       |
| NR6A1  | PECAM1    | 0.2322       | CA14     | FOXD2     | 0.2386       |
| HES1   | MYO9B     | 0.2323       | MAPK7    | TDG       | 0.2387       |
| KCTD12 | MYO9B     | 0.2325       | MYO9B    | XRCC6     | 0.2388       |
| ID2    | PROX1     | 0.2332       | RBL1     | TDG       | 0.2389       |
| SPDEF  | TNK2      | 0.2336       | IL2RB    | XRCC6     | 0.2390       |
| MAML1  | SLC4A4    | 0.2336       | NR6A1    | TIMP3     | 0.2391       |
| KCTD12 | MAML1     | 0.2338       | KCTD12   | SPDEF     | 0.2391       |
| KCTD12 | NOTCH1    | 0.2340       | CSPG5    | XRCC6     | 0.2393       |
| KCTD12 | SLC7A6    | 0.2344       | MYO9B    | SPDEF     | 0.2394       |
| BMP4   | NR6A1     | 0.2346       | SLC3A1   | SLCO2A1   | 0.2394       |
| HES1   | MAML1     | 0.2351       | MLH1     | TDG       | 0.2395       |
| CHI3L1 | NIFK      | 0.2352       | TJP1     | TNK2      | 0.2395       |
| PRKCH  | PECAM1    | 0.2356       | ESR1     | TNFRSF10D | 0.2395       |
| PPAP2A | TDG       | 0.2360       | BMP4     | DDX11     | 0.2397       |
| ESR1   | FOXD2     | 0.2361       | PCNA     | SPDEF     | 0.2397       |

| Gene 1   | Gene 2    | bresub error |
|----------|-----------|--------------|
| MAML1    | SHH       | 0.2398       |
| PLCB2    | SLCO2A1   | 0.2401       |
| XIST     | XRCC6     | 0.2404       |
| TGM4     | XRCC6     | 0.2404       |
| TBRG1    | TDG       | 0.2404       |
| BCL2L1   | XRCC6     | 0.2405       |
| BMPR2    | TDG       | 0.2405       |
| GADD45B  | PROX1     | 0.2406       |
| TBRG1    | FOXD2     | 0.2406       |
| PRKCH    | WNT5A     | 0.2406       |
| PRKCI    | TNK2      | 0.2407       |
| ADAM17   | TDG       | 0.2408       |
| KCTD12   | LIG3      | 0.2408       |
| C11orf30 | XRCC6     | 0.2409       |
| TAT      | XRCC6     | 0.2409       |
| MAB21L2  | XRCC6     | 0.2409       |
| BMP4     | REG1B     | 0.2410       |
| SERPINA1 | TNK2      | 0.2411       |
| MYC      | TNFRSF10D | 0.2412       |
| PPAP2A   | TNFRSF10D | 0.2413       |
| PROX1    | WNT5A     | 0.2414       |
| NEU3     | XRCC6     | 0.2414       |
| ATF4     | TNK2      | 0.2414       |
| PPAP2A   | PDE6D     | 0.2414       |
| PPAP2A   | SLCO2A1   | 0.2414       |
| BCO2     | XRCC6     | 0.2415       |
| HOXC8    | XRCC6     | 0.2416       |
| SLC1A4   | XRCC6     | 0.2416       |
| SLC7A7   | SPDEF     | 0.2419       |
| ID3      | XRCC6     | 0.2419       |
| CA14     | PDE6D     | 0.2420       |
| MYC      | FOXD2     | 0.2420       |
| PRKCI    | SLC1A4    | 0.2420       |
| LAMB1    | PRKCI     | 0.2422       |
| IER3     | XRCC6     | 0.2422       |
| COL3A1   | PRKCI     | 0.2423       |
| DFFA     | PROX1     | 0.2423       |
| UHRF1    | XRCC6     | 0.2423       |

| Gene 1  | Gene 2    | bresub error |
|---------|-----------|--------------|
| ITGAM   | TDG       | 0.2423       |
| NOTCH4  | PRKCI     | 0.2424       |
| DDX11   | PECAM1    | 0.2424       |
| ADAM17  | TNFRSF10D | 0.2426       |
| NOS2    | SLC4A4    | 0.2426       |
| MAML1   | PRKCI     | 0.2427       |
| ADAM17  | FOXD2     | 0.2427       |
| HOXA10  | MYO9B     | 0.2427       |
| SPDEF   | TDG       | 0.2428       |
| TBRG1   | PDE6D     | 0.2428       |
| ATF4    | MAML1     | 0.2428       |
| SPDEF   | TNFRSF10D | 0.2429       |
| DCN     | PROX1     | 0.2430       |
| MAML1   | TJP1      | 0.2430       |
| KCTD12  | MAB21L2   | 0.2430       |
| NIFK    | NR6A1     | 0.2431       |
| PRKCI   | TSC2      | 0.2431       |
| ALOX15  | SLC4A4    | 0.2432       |
| ADAM17  | PDE6D     | 0.2432       |
| NAIP    | SLCO2A1   | 0.2433       |
| WNT4    | SLCO2A1   | 0.2433       |
| PLCB2   | FOXD2     | 0.2434       |
| RASSF1  | TNFRSF10D | 0.2437       |
| HOXA2   | PROX1     | 0.2437       |
| MAPK7   | PDE6D     | 0.2438       |
| MSH6    | SLCO2A1   | 0.2438       |
| HSPD1   | SLC4A4    | 0.2438       |
| SLCO2A1 | SPDEF     | 0.2438       |
| ID2     | NR6A1     | 0.2439       |
| NOG     | XRCC6     | 0.2439       |
| SLC3A1  | TDG       | 0.2439       |
| PTPN22  | TDG       | 0.2439       |
| CA14    | SLCO2A1   | 0.2439       |
| ELP3    | IL18      | 0.2439       |
| NEU3    | PRKCI     | 0.2439       |
| CA14    | TNFRSF10D | 0.2440       |
| CSPG5   | PRKCI     | 0.2440       |
| CSPG5   | SLC4A4    | 0.2441       |

| Gene 1   | Gene 2    | bresub error |
|----------|-----------|--------------|
| ESR1     | PDE6D     | 0.2442       |
| PRKCH    | NR6A1     | 0.2443       |
| MAPK7    | TNFRSF10D | 0.2443       |
| SLC4A4   | TAT       | 0.2443       |
| IL2RB    | PRKCI     | 0.2445       |
| UHRF1    | PRKCI     | 0.2445       |
| TP63     | SLC4A4    | 0.2446       |
| RASSF1   | FOXD2     | 0.2446       |
| FASLG    | PRKCI     | 0.2446       |
| UHRF1    | IL18      | 0.2447       |
| CSPG5    | ATF4      | 0.2447       |
| SLC3A1   | FOXD2     | 0.2447       |
| PLCB2    | TNFRSF10D | 0.2448       |
| NIFK     | TRAFD1    | 0.2448       |
| BMPR2    | IL18      | 0.2449       |
| NOG      | SLC4A4    | 0.2450       |
| GJD2     | ATF4      | 0.2450       |
| HAS2     | XRCC6     | 0.2450       |
| ITGAL    | SLCO2A1   | 0.2450       |
| RBL1     | SLC4A4    | 0.2450       |
| LDHB     | XRCC6     | 0.2451       |
| XIST     | SLC4A4    | 0.2451       |
| CYP4F3   | XRCC6     | 0.2452       |
| LPAR4    | XRCC6     | 0.2452       |
| FOXD2    | MSH6      | 0.2453       |
| IHH      | SLC4A4    | 0.2453       |
| GJD2     | PRKCI     | 0.2454       |
| PTPN22   | TNK2      | 0.2455       |
| PDX1     | XRCC6     | 0.2455       |
| PDE6D    | SPDEF     | 0.2456       |
| OGG1     | SLCO2A1   | 0.2456       |
| BMP4     | NIFK      | 0.2456       |
| SLC25A13 | TNFRSF10D | 0.2456       |
| FOXD2    | MAPK7     | 0.2458       |
| CCDC80   | SLCO2A1   | 0.2458       |
| MLH1     | PDE6D     | 0.2458       |
| TBRG1    | TNFRSF10D | 0.2458       |
| BCL2L1   | SLC4A4    | 0.2459       |

| Gene 1   | Gene 2    | bresub error |
|----------|-----------|--------------|
| CDC25B   | SLC4A4    | 0.2459       |
| PROX1    | REL       | 0.2460       |
| COLEC12  | TDG       | 0.2460       |
| FPR1     | XRCC6     | 0.2460       |
| BMPR2    | SLCO2A1   | 0.2461       |
| PLD3     | TDG       | 0.2461       |
| UHRF1    | ATF4      | 0.2461       |
| SLC3A1   | PDE6D     | 0.2461       |
| NOS2     | XRCC6     | 0.2461       |
| DAPK3    | SLC4A4    | 0.2461       |
| MYC      | PDE6D     | 0.2462       |
| GABRB3   | TNFRSF10D | 0.2462       |
| PLCB2    | PDE6D     | 0.2462       |
| WLS      | SLC4A4    | 0.2463       |
| NOTCH4   | ATF4      | 0.2464       |
| COLEC12  | SLCO2A1   | 0.2464       |
| MLH1     | TNFRSF10D | 0.2464       |
| PLD3     | SLCO2A1   | 0.2465       |
| IL18     | RBBP9     | 0.2466       |
| COL3A1   | RUNX2     | 0.2467       |
| MAML1    | SERPINA1  | 0.2467       |
| MAP2K2   | KCTD12    | 0.2468       |
| SLC4A4   | TNFRSF10D | 0.2468       |
| IL18     | KCTD12    | 0.2469       |
| BMP4     | TRAFD1    | 0.2470       |
| HMOX1    | IL18      | 0.2470       |
| GSS      | PRKCI     | 0.2470       |
| MELK     | PRKCI     | 0.2471       |
| NAIP     | TTN       | 0.2471       |
| CDK7     | SLC4A4    | 0.2471       |
| NOD2     | SLCO2A1   | 0.2471       |
| C11orf30 | PRKCI     | 0.2472       |
| MAML1    | RUNX2     | 0.2472       |
| PCNA     | XRCC6     | 0.2473       |
| PLCG2    | SLC4A4    | 0.2473       |
| MSH6     | TDG       | 0.2474       |
| PLCB2    | TDG       | 0.2474       |
| HAS2     | HES1      | 0.2475       |

| Gene 1   | Gene 2  | bresub error |
|----------|---------|--------------|
| PRKCI    | TAT     | 0.2476       |
| FGF9     | SLC4A4  | 0.2477       |
| MYO9B    | TJP1    | 0.2477       |
| HOXA13   | XRCC6   | 0.2477       |
| RELA     | XRCC6   | 0.2478       |
| PTPN2    | SLC4A4  | 0.2478       |
| HES1     | NOS2    | 0.2478       |
| MEN1     | SLC4A4  | 0.2479       |
| PLCG2    | HES1    | 0.2480       |
| CDC25B   | XRCC6   | 0.2480       |
| BTB      | SLCO2A1 | 0.2481       |
| IL18     | SLC4A4  | 0.2481       |
| ACADS    | MAML1   | 0.2481       |
| WNT4     | FOXD2   | 0.2481       |
| PECAM1   | PROX1   | 0.2481       |
| SLC6A19  | XRCC6   | 0.2481       |
| HES1     | TAT     | 0.2482       |
| ATF4     | TSC2    | 0.2482       |
| PROX1    | PTK7    | 0.2482       |
| COL3A1   | XRCC6   | 0.2482       |
| LAMB1    | RUNX2   | 0.2482       |
| HOXC4    | XRCC6   | 0.2482       |
| CYB5R1   | SLC4A4  | 0.2484       |
| FGF5     | SLC4A4  | 0.2484       |
| ATF4     | TAT     | 0.2484       |
| NEU3     | ATF4    | 0.2485       |
| ICAM1    | SLC7A6  | 0.2485       |
| HIF3A    | SLC4A4  | 0.2485       |
| LRIG1    | TTN     | 0.2485       |
| KCTD12   | SORD    | 0.2486       |
| CHI3L1   | TIMP3   | 0.2486       |
| ATF4     | IL2RB   | 0.2486       |
| CDCA7    | PRKCI   | 0.2487       |
| MAB21L2  | SLCO2A1 | 0.2488       |
| MAML1    | TTN     | 0.2488       |
| SIGIRR   | TDG     | 0.2488       |
| NOG      | PRKCI   | 0.2489       |
| TNFRSF1B | XRCC6   | 0.2490       |

| Gene 1    | Gene 2    | bresub error |
|-----------|-----------|--------------|
| KCTD12    | KIT       | 0.2492       |
| CDK7      | XRCC6     | 0.2492       |
| PTPN22    | TNFRSF10D | 0.2492       |
| HES1      | HOXA13    | 0.2492       |
| MEN1      | XRCC6     | 0.2492       |
| PLCB4     | SLCO2A1   | 0.2492       |
| NEU3      | HES1      | 0.2493       |
| ATF4      | CAV1      | 0.2494       |
| ABHD5     | XRCC6     | 0.2494       |
| FOXP4     | TDG       | 0.2494       |
| BIRC2     | XRCC6     | 0.2494       |
| CSPG5     | SLCO2A1   | 0.2494       |
| PPARG     | SLC4A4    | 0.2494       |
| GJB2      | XRCC6     | 0.2495       |
| FOXD2     | ICAM1     | 0.2495       |
| SPI1      | XRCC6     | 0.2495       |
| MELK      | RUNX2     | 0.2496       |
| HMOX1     | SLCO2A1   | 0.2497       |
| PPAP2B    | PROX1     | 0.2498       |
| RELA      | SLC4A4    | 0.2499       |
| MALL      | RUNX2     | 0.2499       |
| PCDH7     | XRCC6     | 0.2499       |
| TNFRSF10D | TSC2      | 0.2500       |
| KCTD12    | SLC28A2   | 0.2500       |
| ALPI      | HES1      | 0.2500       |
| TBRG1     | IL18      | 0.2500       |
| ITGAL     | FOXD2     | 0.2500       |
| MSH6      | PDE6D     | 0.2500       |
| LDHB      | PRKCI     | 0.2500       |
| COL3A1    | FOXD2     | 0.2501       |
| CCL15     | KCTD12    | 0.2501       |
| CDX1      | SLC4A4    | 0.2501       |
| IL18      | MSH6      | 0.2501       |
| BTB       | FOXD2     | 0.2501       |
| NAIP      | SLC4A4    | 0.2501       |
| CYB5R1    | PRKCI     | 0.2501       |
| PTAFR     | TNFRSF10D | 0.2501       |
| PDE6D     | PTPN22    | 0.2502       |

| Gene 1  | Gene 2    | bresub error |
|---------|-----------|--------------|
| MSH3    | SLCO2A1   | 0.2502       |
| MYO9B   | SERPINA1  | 0.2502       |
| GJD2    | XRCC6     | 0.2502       |
| IGF2BP1 | PROX1     | 0.2502       |
| PDE4B   | SLC4A4    | 0.2502       |
| MAML1   | TJP3      | 0.2502       |
| POR     | XRCC6     | 0.2503       |
| NANOG   | PROX1     | 0.2503       |
| SLC3A1  | TNFRSF10D | 0.2503       |
| LIG3    | SPDEF     | 0.2503       |
| PECAM1  | TLR2      | 0.2503       |
| CA3     | SLCO2A1   | 0.2504       |
| HES1    | WNT3      | 0.2505       |
| NEU3    | SLC4A4    | 0.2505       |
| PRKCH   | CHI3L1    | 0.2505       |
| ATF4    | FASLG     | 0.2505       |
| HES1    | IL2RB     | 0.2505       |
| SLC4A4  | SLCO2A1   | 0.2506       |
| PLS3    | PROX1     | 0.2506       |
| ATF4    | SLC1A4    | 0.2506       |
| HOXA10  | SLC7A7    | 0.2506       |
| CCND1   | SLCO2A1   | 0.2506       |
| ATF4    | HOXA13    | 0.2506       |
| CGNL1   | SLCO2A1   | 0.2506       |
| ELP3    | SLCO2A1   | 0.2508       |
| NOS2    | SPDEF     | 0.2508       |
| KLK6    | IL18      | 0.2508       |
| HES1    | TAZ       | 0.2508       |
| REST    | SLC4A4    | 0.2508       |
| COL3A1  | IL18      | 0.2509       |
| PECAM1  | REG1B     | 0.2509       |
| ATF4    | DAPK3     | 0.2509       |
| SLC3A1  | IL18      | 0.2510       |
| GCLM    | XRCC6     | 0.2510       |
| BTD     | IL18      | 0.2510       |
| SLC27A2 | SLCO2A1   | 0.2511       |
| NUPR1   | XRCC6     | 0.2511       |
| IL18    | TAT       | 0.2511       |

| Gene 1   | Gene 2    | bresub error |
|----------|-----------|--------------|
| NOS2     | PTPN22    | 0.2512       |
| ID2      | XRCC6     | 0.2512       |
| HOXC4    | PRKCI     | 0.2512       |
| ITGAM    | TNFRSF10D | 0.2512       |
| HOXA13   | SLC4A4    | 0.2512       |
| PRKACA   | TDG       | 0.2512       |
| RASSF1   | SLCO2A1   | 0.2513       |
| SLCO2A1  | TSC2      | 0.2514       |
| DDIT4    | XRCC6     | 0.2514       |
| PLA2G4B  | SLC4A4    | 0.2514       |
| MYC      | SLCO2A1   | 0.2514       |
| CA13     | KCTD12    | 0.2515       |
| SLC7A7   | XRCC6     | 0.2515       |
| NFKB2    | TDG       | 0.2515       |
| RUNX2    | TLR5      | 0.2515       |
| GJC1     | XRCC6     | 0.2515       |
| MSH2     | SLC4A4    | 0.2515       |
| SLC25A36 | SLC4A4    | 0.2516       |
| CCND1    | TDG       | 0.2517       |
| PRKACA   | SLCO2A1   | 0.2517       |
| CEACAM19 | IL18      | 0.2519       |
| GSS      | XRCC6     | 0.2519       |
| MSH6     | TNFRSF10D | 0.2519       |
| BMP4     | SLC39A5   | 0.2520       |
| PTAFR    | SLCO2A1   | 0.2521       |
| SLC7A7   | TJP1      | 0.2521       |
| HES1     | SLC1A4    | 0.2521       |
| PECAM1   | PTK7      | 0.2521       |
| ATF4     | LIG3      | 0.2522       |
| NIFK     | TIMP3     | 0.2522       |
| PODXL    | XRCC6     | 0.2522       |
| PCNA     | PRKCI     | 0.2522       |
| HES1     | RBBP9     | 0.2523       |
| DAPK3    | PRKCI     | 0.2524       |
| PLA2G4B  | XRCC6     | 0.2524       |
| IER3     | PRKCI     | 0.2524       |
| HOXA2    | PECAM1    | 0.2524       |
| ADAM10   | MAML1     | 0.2524       |

| Gene 1    | Gene 2    | bresub error |
|-----------|-----------|--------------|
| CDKN2A    | SLC4A4    | 0.2524       |
| MALL      | PRKCI     | 0.2524       |
| GJC1      | KCTD12    | 0.2524       |
| MACC1     | XRCC6     | 0.2524       |
| ERBB4     | SLC4A4    | 0.2525       |
| SIGIRR    | XRCC6     | 0.2525       |
| LIG3      | XRCC6     | 0.2525       |
| ISL1      | NR6A1     | 0.2525       |
| FSTL1     | SLC4A4    | 0.2525       |
| NOD2      | IL18      | 0.2525       |
| ALOX15    | PRKCI     | 0.2525       |
| DEFA5     | SLC4A4    | 0.2525       |
| ATF4      | NOG       | 0.2525       |
| HOXB5     | SLC4A4    | 0.2526       |
| DPEP1     | XRCC6     | 0.2526       |
| TNFRSF10D | XRCC6     | 0.2527       |
| PPARG     | XRCC6     | 0.2527       |
| MAPK9     | XRCC6     | 0.2527       |
| UHRF1     | RUNX2     | 0.2527       |
| CAV1      | PRKCI     | 0.2528       |
| CSPG5     | IL18      | 0.2528       |
| RUNX2     | SLC1A4    | 0.2528       |
| FFAR4     | KCTD12    | 0.2528       |
| LIG3      | SREBF2    | 0.2529       |
| FOXD2     | PTPN22    | 0.2530       |
| NOTCH3    | PROX1     | 0.2530       |
| SLC4A4    | SLC7A7    | 0.2530       |
| CEACAM3   | XRCC6     | 0.2530       |
| ORMDL3    | XRCC6     | 0.2531       |
| PLCB2     | IL18      | 0.2531       |
| SLC34A2   | TNFRSF10D | 0.2531       |
| EGFR      | SLC4A4    | 0.2532       |
| GSTM3     | TDG       | 0.2532       |
| ID2       | SLC4A4    | 0.2532       |
| NTHL1     | XRCC6     | 0.2532       |
| CCDC80    | IL18      | 0.2533       |
| HES1      | PCNA      | 0.2533       |
| IL2RB     | SLC4A4    | 0.2533       |

| Gene 1   | Gene 2   | bresub error |
|----------|----------|--------------|
| SORD     | XRCC6    | 0.2533       |
| FPR1     | SLC4A4   | 0.2533       |
| ICAM1    | TDG      | 0.2533       |
| HOXA10   | HOXA13   | 0.2534       |
| PRKCI    | SORD     | 0.2534       |
| DCN      | XRCC6    | 0.2534       |
| PTPN2    | XRCC6    | 0.2535       |
| PTPN22   | SLCO2A1  | 0.2535       |
| KCTD12   | ZDHHC20  | 0.2535       |
| HOXA13   | PRKCI    | 0.2535       |
| POR      | PRKCI    | 0.2535       |
| MYO9B    | SREBF2   | 0.2535       |
| CCDC80   | FOXD2    | 0.2536       |
| MUC19    | SLCO2A1  | 0.2536       |
| SLC39A5  | PECAM1   | 0.2536       |
| RUNX2    | TSC2     | 0.2536       |
| MALL     | TTN      | 0.2536       |
| LIN28A   | XRCC6    | 0.2536       |
| IL18     | SERPINA1 | 0.2537       |
| PIK3R1   | XRCC6    | 0.2537       |
| KCTD12   | SLC38A2  | 0.2537       |
| PCNA     | SHH      | 0.2537       |
| DEFA5    | XRCC6    | 0.2538       |
| WNT4     | PDE6D    | 0.2538       |
| SLC25A36 | XRCC6    | 0.2538       |
| RAD51D   | FOXD2    | 0.2538       |
| FAM129A  | PROX1    | 0.2539       |
| ADRB1    | PRKCI    | 0.2539       |
| CDKN2A   | XRCC6    | 0.2540       |
| ATF4     | MAB21L2  | 0.2540       |
| CDX1     | XRCC6    | 0.2540       |
| SLC5A1   | XRCC6    | 0.2540       |
| ABCC1    | XRCC6    | 0.2540       |
| HOXA5    | KCTD12   | 0.2541       |
| HES1     | RELA     | 0.2542       |
| NOD2     | FOXD2    | 0.2542       |
| SLC7A6   | SPDEF    | 0.2542       |
| NOTCH4   | SLC4A4   | 0.2543       |

| Gene 1   | Gene 2  | bresub error |
|----------|---------|--------------|
| DHFR     | FOXD2   | 0.2543       |
| IL18     | MALL    | 0.2543       |
| SLC1A4   | SREBF2  | 0.2543       |
| ALOX15   | HOXA10  | 0.2544       |
| SLC5A9   | TDG     | 0.2544       |
| GJB2     | SLC4A4  | 0.2544       |
| CAMK2B   | SLC4A4  | 0.2544       |
| CCL15    | XRCC6   | 0.2544       |
| HEY1     | FOXD2   | 0.2544       |
| CDH5     | XRCC6   | 0.2544       |
| PARD3    | PROX1   | 0.2545       |
| IL18     | TLR5    | 0.2545       |
| PLCB2    | SLC7A6  | 0.2546       |
| MAP2K2   | XRCC6   | 0.2546       |
| CEACAM19 | SLCO2A1 | 0.2546       |
| SLC4A4   | TFRC    | 0.2547       |
| CYB5R1   | HES1    | 0.2547       |
| PLCB4    | FOXD2   | 0.2547       |
| FOXD2    | OGG1    | 0.2547       |
| CDH5     | RUNX2   | 0.2547       |
| HOXA13   | SREBF2  | 0.2547       |
| PRKCI    | WNT3    | 0.2548       |
| NIFK     | PECAM1  | 0.2548       |
| SLC35A1  | HES1    | 0.2549       |
| DHFR     | SLCO2A1 | 0.2549       |

| Gene 1   | Gene 2    | bresub error |
|----------|-----------|--------------|
| COLEC12  | TNFRSF10D | 0.2550       |
| OGG1     | TDG       | 0.2551       |
| GNL1     | HES1      | 0.2551       |
| BMPR2    | FOXD2     | 0.2551       |
| HSPD1    | PRKCI     | 0.2551       |
| CEACAM19 | RUNX2     | 0.2551       |
| POR      | RUNX2     | 0.2551       |
| BAMBI    | XRCC6     | 0.2552       |
| SST      | SLCO2A1   | 0.2552       |
| SLC6A19  | SLC4A4    | 0.2553       |
| SLC39A8  | ATF4      | 0.2553       |
| ELP3     | TDG       | 0.2553       |
| ICAM1    | PDE6D     | 0.2553       |
| HMOX1    | TDG       | 0.2553       |
| RBBP9    | SLC4A4    | 0.2553       |
| GCLM     | SLC4A4    | 0.2553       |
| PRKCH    | NIFK      | 0.2553       |
| IL1R2    | XRCC6     | 0.2553       |
| BCL2L13  | KCTD12    | 0.2553       |
| MELK     | SLC7A6    | 0.2554       |
| REG1A    | XRCC6     | 0.2555       |
| ITGAL    | PDE6D     | 0.2555       |
| ELP3     | SREBF2    | 0.2555       |
| CSPG5    | TNFRSF10D | 0.2555       |
| GSS      | RUNX2     | 0.2556       |

**Table S7. Top 500 Three-Gene LDA Classifiers.** The top 500 three-gene linear discriminant analysis classifiers and their respective misclassification rate in flaxseed lignan supplement vs placebo treatment in all samples regardless of their ENL phenotype.

| Gene 1 | Gene 2  | Gene 3 | bresub<br>error | Gene 1  | Gene 2  | Gene 3 | bresub<br>error |
|--------|---------|--------|-----------------|---------|---------|--------|-----------------|
| PCDH7  | KCTD12  | SPDEF  | 0.2014          | PRKCH   | SLC39A5 | WNT5A  | 0.2115          |
| EPHB6  | KCTD12  | SPDEF  | 0.2015          | BMP4    | PROX1   | WNT5A  | 0.2121          |
| KCTD12 | MAML1   | SPDEF  | 0.2021          | CHI3L1  | NR6A1   | PROX1  | 0.2121          |
| BMP4   | FGFR1   | WNT5A  | 0.2024          | EP400   | KCTD12  | SPDEF  | 0.2122          |
| KCTD12 | NOTCH1  | SPDEF  | 0.2027          | BMP4    | IER3    | WNT5A  | 0.2123          |
| KCTD12 | SPDEF   | TNK2   | 0.2031          | BMP4    | NR6A1   | REL    | 0.2124          |
| HOXA13 | KCTD12  | SPDEF  | 0.2034          | KCTD12  | MGAT3   | SPDEF  | 0.2124          |
| KCTD12 | SLC7A7  | SPDEF  | 0.2036          | PRKCH   | SLC39A5 | PROX1  | 0.2126          |
| BMP4   | NR6A1   | WNT5A  | 0.2052          | KCTD12  | MYO9B   | SPDEF  | 0.2127          |
| KCTD12 | SORD    | SPDEF  | 0.2059          | DDX11   | PROX1   | ZNF365 | 0.2128          |
| KCTD12 | LIG3    | SPDEF  | 0.2067          | SLC39A5 | NR6A1   | PROX1  | 0.2130          |
| GJC1   | KCTD12  | SPDEF  | 0.2071          | BMP4    | SLC39A5 | WNT5A  | 0.2130          |
| KCTD12 | SLC13A2 | SPDEF  | 0.2076          | KEAP1   | NIFK    | PROX1  | 0.2132          |
| AXIN1  | KCTD12  | SPDEF  | 0.2081          | BMP4    | REL     | WNT5A  | 0.2132          |
| XIST   | KCTD12  | SPDEF  | 0.2083          | NIFK    | PPAP2B  | PROX1  | 0.2135          |
| BMP4   | TLR2    | WNT5A  | 0.2085          | CCL15   | KCTD12  | SPDEF  | 0.2135          |
| KCTD12 | SLC28A1 | SPDEF  | 0.2086          | KCTD12  | NOTCH1  | TNK2   | 0.2138          |
| KCTD12 | KIT     | SPDEF  | 0.2087          | IL36RN  | NIFK    | PROX1  | 0.2139          |
| KCTD12 | PCNA    | SPDEF  | 0.2089          | PRKCH   | DDX11   | PROX1  | 0.2139          |
| KCTD12 | MAB21L2 | SPDEF  | 0.2089          | BMP4    | PROX1   | REL    | 0.2139          |
| DDX11  | IER3    | PROX1  | 0.2094          | KCTD12  | LIG3    | TNK2   | 0.2140          |
| ACSL4  | KCTD12  | SPDEF  | 0.2099          | HOXA9   | KCTD12  | TNK2   | 0.2141          |
| BMP4   | REG1B   | WNT5A  | 0.2102          | BMP4    | NOS1    | WNT5A  | 0.2141          |
| KCTD12 | SLC2A5  | SPDEF  | 0.2103          | SLC10A2 | KCTD12  | SPDEF  | 0.2141          |
| IL1R2  | DDX11   | PROX1  | 0.2107          | DDX11   | PROX1   | REG1B  | 0.2142          |
| BMP4   | PRKCH   | WNT5A  | 0.2108          | TGM2    | NIFK    | PROX1  | 0.2143          |
| CHI3L1 | NIFK    | PROX1  | 0.2109          | BMP4    | PPAP2B  | WNT5A  | 0.2143          |
| BMP4   | NFKB2   | NR6A1  | 0.2110          | PRKCH   | PROX1   | PTK7   | 0.2143          |
| BMP4   | PRNP    | WNT5A  | 0.2112          | HES1    | IL18    | MAML1  | 0.2144          |
| BMP4   | DDX11   | WNT5A  | 0.2113          | BMP4    | WNT5A   | ZNF365 | 0.2144          |
| KCTD12 | PTPN22  | SPDEF  | 0.2113          | BMP4    | NFKB2   | PROX1  | 0.2145          |
| CA13   | KCTD12  | SPDEF  | 0.2114          | DDX11   | ID2     | PROX1  | 0.2145          |
| BMP4   | TLR3    | WNT5A  | 0.2115          | NR6A1   | PPAP2B  | PROX1  | 0.2145          |
| PRKCH  | CHI3L1  | PROX1  | 0.2115          | BMP4    | NR6A1   | PROX1  | 0.2145          |



| Gene 1  | Gene 2  | Gene 3    | bresub<br>error | Gene 1  | Gene 2  | Gene 3    | bresub<br>error |
|---------|---------|-----------|-----------------|---------|---------|-----------|-----------------|
| KCTD12  | SLC13A2 | TNK2      | 0.2145          | NR6A1   | PROX1   | PTPN11    | 0.2160          |
| IL18    | MAML1   | SREBF2    | 0.2145          | ADAM17  | KCTD12  | TNK2      | 0.2160          |
| PROX1   | PTK7    | REG1B     | 0.2145          | BMP4    | PROX1   | PTK7      | 0.2160          |
| DDX11   | NIFK    | PROX1     | 0.2145          | AKTIP   | NIFK    | PROX1     | 0.2161          |
| SLC39A5 | DDX11   | PROX1     | 0.2145          | CSPG5   | KCTD12  | TNK2      | 0.2161          |
| PLCD1   | NIFK    | PROX1     | 0.2145          | KCTD12  | SLC7A11 | SPDEF     | 0.2161          |
| NPAT    | KCTD12  | SPDEF     | 0.2146          | BMP4    | DDX11   | PROX1     | 0.2161          |
| BMP4    | TGM2    | WNT5A     | 0.2147          | BMP4    | TGM2    | PROX1     | 0.2162          |
| BMP4    | NR6A1   | PTK7      | 0.2147          | LPAR4   | KCTD12  | SPDEF     | 0.2162          |
| KCTD12  | PECAM1  | TNFRSF10D | 0.2149          | HES1    | IL18    | MYO9B     | 0.2162          |
| NIFK    | PROX1   | TNFRSF10A | 0.2150          | CHI3L1  | PROX1   | TIMP3     | 0.2163          |
| SLC39A5 | NIFK    | PROX1     | 0.2150          | NIFK    | PROX1   | REG1B     | 0.2164          |
| NIFK    | PROX1   | PTK7      | 0.2151          | DCN     | NIFK    | PROX1     | 0.2164          |
| CA14    | KCTD12  | TNK2      | 0.2151          | KCTD12  | PSME2   | SPDEF     | 0.2165          |
| BMP4    | IL1R2   | WNT5A     | 0.2151          | HOXA9   | KCTD12  | SPDEF     | 0.2165          |
| RBL1    | KCTD12  | TNK2      | 0.2152          | MYC     | KCTD12  | TNK2      | 0.2165          |
| NIFK    | NR6A1   | PROX1     | 0.2152          | HOXA10  | IL18    | MAML1     | 0.2166          |
| HEY1    | KCTD12  | TNK2      | 0.2152          | PRKCH   | NIFK    | PROX1     | 0.2166          |
| NFKB2   | NR6A1   | PROX1     | 0.2152          | ITGB1   | KCTD12  | SPDEF     | 0.2166          |
| GADD45B | PRKCH   | PROX1     | 0.2153          | RAD51D  | KCTD12  | TNK2      | 0.2166          |
| NIFK    | PROX1   | TIMP3     | 0.2153          | PRKCH   | NR6A1   | PROX1     | 0.2166          |
| DDX11   | PROX1   | TIMP3     | 0.2153          | CDH3    | NIFK    | PROX1     | 0.2167          |
| KEAP1   | NR6A1   | PROX1     | 0.2154          | CHI3L1  | DDX11   | PROX1     | 0.2168          |
| IER3    | NIFK    | PROX1     | 0.2154          | KCTD12  | NOS2    | SPDEF     | 0.2168          |
| HOXA2   | DDX11   | PROX1     | 0.2154          | KCTD12  | MAB21L2 | TNK2      | 0.2168          |
| KCTD12  | LRIG1   | SPDEF     | 0.2154          | TGFB2   | KCTD12  | TNK2      | 0.2168          |
| NR6A1   | PROX1   | WNT5A     | 0.2154          | BMP4    | DOT1L   | PROX1     | 0.2168          |
| NR6A1   | PROX1   | TLR3      | 0.2154          | HOXD13  | KCTD12  | TNK2      | 0.2169          |
| BMP4    | SLC5A9  | PROX1     | 0.2155          | PRKCH   | SLC6A14 | PROX1     | 0.2169          |
| PLS3    | NIFK    | PROX1     | 0.2155          | KCTD12  | MSH6    | TNK2      | 0.2169          |
| BMP4    | PECAM1  | WNT5A     | 0.2156          | KCTD12  | SPDEF   | TNFRSF10D | 0.2169          |
| PRKCH   | SLC39A5 | PTK7      | 0.2157          | DCN     | DDX11   | PROX1     | 0.2170          |
| KCTD12  | PTPN22  | SLC7A7    | 0.2158          | KDM4A   | KCTD12  | SPDEF     | 0.2170          |
| COL1A1  | NIFK    | PROX1     | 0.2158          | KCTD12  | TAT     | TNK2      | 0.2170          |
| NIFK    | PROX1   | PTPN11    | 0.2159          | FGFR3   | KCTD12  | SPDEF     | 0.2170          |
| TLR4    | KCTD12  | TNK2      | 0.2159          | KCTD12  | TAZ     | TNK2      | 0.2170          |
| KCTD12  | PTPN22  | TNK2      | 0.2159          | ADAMTS4 | NIFK    | PROX1     | 0.2170          |

| Gene 1  | Gene 2  | Gene 3  | bresub<br>error | Gene 1  | Gene 2 | Gene 3    | bresub<br>error |
|---------|---------|---------|-----------------|---------|--------|-----------|-----------------|
| NR6A1   | PROX1   | TIMP3   | 0.2170          | KCTD12  | MAML1  | TNFRSF10D | 0.2179          |
| KCNH2   | NIFK    | PROX1   | 0.2170          | NIFK    | PROX1  | SLC13A1   | 0.2179          |
| GADD45B | NR6A1   | PROX1   | 0.2171          | BMP4    | MAPK7  | PROX1     | 0.2179          |
| IL1R2   | NIFK    | PROX1   | 0.2172          | ISL1    | KCTD12 | TNK2      | 0.2179          |
| GABRB3  | KCTD12  | TNK2    | 0.2172          | CHI3L1  | ID2    | PROX1     | 0.2179          |
| NR6A1   | PROX1   | SLC13A1 | 0.2172          | BMP4    | SST    | WNT5A     | 0.2180          |
| TBRG1   | KCTD12  | TNK2    | 0.2172          | IL1R2   | CHI3L1 | PROX1     | 0.2180          |
| PRKCH   | NR6A1   | REG1B   | 0.2172          | CHI3L1  | PROX1  | ZNF365    | 0.2180          |
| BCL2L14 | NIFK    | PROX1   | 0.2172          | BMP4    | PRKCH  | PROX1     | 0.2180          |
| BMP4    | CEACAM3 | WNT5A   | 0.2173          | KCTD12  | TNK2   | TSC2      | 0.2180          |
| KCTD12  | MLH1    | TNK2    | 0.2173          | MAPK9   | PROX1  | TLR2      | 0.2180          |
| BMP4    | DOT1L   | WNT5A   | 0.2173          | TGFB2   | KCTD12 | SPDEF     | 0.2181          |
| CHI3L1  | DCN     | PROX1   | 0.2173          | ID2     | NIFK   | PROX1     | 0.2181          |
| KCTD12  | MAML1   | NOS2    | 0.2174          | NIFK    | PROX1  | ZNF365    | 0.2182          |
| KCTD12  | SPDEF   | THRA    | 0.2174          | COL1A2  | NIFK   | PROX1     | 0.2182          |
| LPAR1   | KCTD12  | TNK2    | 0.2174          | APEX1   | NIFK   | PROX1     | 0.2182          |
| NIFK    | PLA2G4D | PROX1   | 0.2174          | CFTR    | NIFK   | PROX1     | 0.2183          |
| HAS2    | KCTD12  | SPDEF   | 0.2174          | GADD45B | NIFK   | PROX1     | 0.2183          |
| SLC39A5 | NR6A1   | WNT5A   | 0.2175          | IL1R2   | PROX1  | PTK7      | 0.2183          |
| CHI3L1  | KEAP1   | PROX1   | 0.2175          | PLAT    | PRKCH  | PROX1     | 0.2183          |
| CAV1    | PROX1   | REL     | 0.2175          | PRKCH   | PROX1  | SLC13A1   | 0.2183          |
| DAB2IP  | NR6A1   | PROX1   | 0.2176          | MAPK9   | NR6A1  | PROX1     | 0.2183          |
| PLS3    | NR6A1   | PROX1   | 0.2176          | HOXA13  | MAML1  | SPDEF     | 0.2184          |
| SLC5A11 | KCTD12  | TNK2    | 0.2176          | MAP2K2  | KCTD12 | SPDEF     | 0.2184          |
| BMP4    | PROX1   | TLR2    | 0.2176          | BMP4    | PTK7   | WNT5A     | 0.2185          |
| SLC39A5 | PROX1   | PTK7    | 0.2176          | KCTD12  | NAIP   | TNK2      | 0.2185          |
| BMP4    | COLEC12 | WNT5A   | 0.2177          | ABCG5   | NR6A1  | PROX1     | 0.2185          |
| BCL2L14 | DDX11   | PROX1   | 0.2177          | GADD45B | CHI3L1 | PROX1     | 0.2185          |
| PRKCH   | GCM1    | PROX1   | 0.2177          | BMP4    | PROX1  | REG1B     | 0.2185          |
| FFAR4   | KCTD12  | TNK2    | 0.2177          | DDX11   | KEAP1  | PROX1     | 0.2185          |
| BMP4    | ID2     | WNT5A   | 0.2177          | PLAT    | NR6A1  | PROX1     | 0.2185          |
| PRKCH   | CHI3L1  | NR6A1   | 0.2178          | ADAMTS4 | CHI3L1 | PROX1     | 0.2185          |
| HOXB5   | NIFK    | PROX1   | 0.2178          | PRKCH   | APEX1  | PROX1     | 0.2185          |
| GSTM3   | KCTD12  | SPDEF   | 0.2178          | PLS3    | DDX11  | PROX1     | 0.2185          |
| ELP3    | KCTD12  | TNK2    | 0.2178          | ABCC1   | NIFK   | PROX1     | 0.2187          |
| NIFK    | PARD3   | PROX1   | 0.2178          | MELK    | KCTD12 | TNK2      | 0.2187          |
| ABCG5   | NIFK    | PROX1   | 0.2178          | CHI3L1  | PROX1  | REG1B     | 0.2187          |

| Gene 1  | Gene 2    | Gene 3 | bresub<br>error | Gene 1  | Gene 2   | Gene 3   | bresub<br>error |
|---------|-----------|--------|-----------------|---------|----------|----------|-----------------|
| IL1R2   | PROX1     | TIMP3  | 0.2187          | CDKN1C  | DDX11    | PROX1    | 0.2193          |
| MAML1   | PTPN22    | SPDEF  | 0.2187          | PRKCH   | PLA2G4D  | PROX1    | 0.2193          |
| CDKN1C  | NIFK      | PROX1  | 0.2187          | CDKN1C  | CHI3L1   | PROX1    | 0.2193          |
| ABCC1   | CHI3L1    | PROX1  | 0.2187          | HAS2    | KCTD12   | TNK2     | 0.2194          |
| MAML1   | SHH       | SREBF2 | 0.2188          | SLC39A5 | PROX1    | TIMP3    | 0.2194          |
| NR6A1   | PROX1     | PTK7   | 0.2188          | COL3A1  | KCTD12   | TNK2     | 0.2195          |
| ID2     | PROX1     | PTK7   | 0.2188          | ADAM10  | IL18     | MAML1    | 0.2195          |
| KCTD12  | SLC28A2   | SPDEF  | 0.2188          | CDKN1C  | NR6A1    | PROX1    | 0.2195          |
| PPAP2A  | KCTD12    | TNK2   | 0.2188          | PRKAR1B | KCTD12   | TNK2     | 0.2195          |
| CEACAM3 | NIFK      | PROX1  | 0.2188          | PLS3    | PRKCH    | PROX1    | 0.2195          |
| PTAFR   | KCTD12    | TNK2   | 0.2189          | CEACAM3 | CHI3L1   | PROX1    | 0.2195          |
| PLCB2   | KCTD12    | TNK2   | 0.2189          | IL18    | MAML1    | TJP1     | 0.2195          |
| SLC6A14 | NIFK      | PROX1  | 0.2189          | DPYSL3  | KCTD12   | TNK2     | 0.2195          |
| DDX11   | PROX1     | PTK7   | 0.2189          | DBN1    | KCTD12   | SPDEF    | 0.2196          |
| BMP4    | NR6A1     | REG1B  | 0.2189          | PRKCH   | DCN      | PROX1    | 0.2196          |
| KCTD12  | TNFRSF10D | TNK2   | 0.2189          | PROX1   | PTK7     | TIMP3    | 0.2196          |
| ELP3    | IL18      | MAML1  | 0.2189          | PRKCH   | COL1A2   | PROX1    | 0.2196          |
| DDX11   | PROX1     | PTPN11 | 0.2189          | RIPK1   | NIFK     | PROX1    | 0.2196          |
| BMP4    | PLA2G7    | PROX1  | 0.2189          | FGF9    | KCTD12   | SPDEF    | 0.2196          |
| PRKCH   | SLC39A5   | DDX11  | 0.2190          | HES1    | IL18     | SERPINA1 | 0.2197          |
| BMP4    | RBP4      | WNT5A  | 0.2190          | HOXD10  | KCTD12   | TNK2     | 0.2197          |
| BMP4    | RBP4      | PROX1  | 0.2190          | BCL2L14 | CHI3L1   | PROX1    | 0.2197          |
| ICAM1   | KCTD12    | TNK2   | 0.2190          | PRKCH   | ABCG5    | PROX1    | 0.2197          |
| CEACAM3 | DDX11     | PROX1  | 0.2190          | HRH1    | NIFK     | PROX1    | 0.2198          |
| BMP4    | HOXC6     | PROX1  | 0.2190          | BMP4    | TBRG1    | PROX1    | 0.2198          |
| HOXA13  | KCTD12    | NOS2   | 0.2191          | BMP4    | HOXA2    | WNT5A    | 0.2198          |
| NR6A1   | PRKCB     | PROX1  | 0.2191          | GJD2    | NIFK     | PROX1    | 0.2198          |
| BMP4    | IL1R2     | PROX1  | 0.2192          | NIFK    | PROX1    | WNT3     | 0.2198          |
| CHI3L1  | PARD3     | PROX1  | 0.2192          | BMP4    | NR6A1    | TLR2     | 0.2199          |
| COL1A1  | NR6A1     | PROX1  | 0.2192          | GJC1    | KCTD12   | TNK2     | 0.2199          |
| HOXA10  | MAML1     | TDG    | 0.2192          | BMP4    | BRIX1    | WNT5A    | 0.2199          |
| GCM1    | NR6A1     | PROX1  | 0.2192          | DCN     | ID2      | PROX1    | 0.2200          |
| HOXB6   | KCTD12    | TNK2   | 0.2192          | MAML1   | TDG      | XRCC6    | 0.2200          |
| PRKCH   | CHI3L1    | DDX11  | 0.2192          | BMP4    | HOXD13   | PROX1    | 0.2200          |
| DCN     | NR6A1     | PROX1  | 0.2192          | CHI3L1  | NR6A1    | TIMP3    | 0.2200          |
| FFAR4   | KCTD12    | SLC7A7 | 0.2192          | IL18    | SERPINA1 | TNK2     | 0.2200          |
| NR6A1   | PLA2G4D   | PROX1  | 0.2193          | NOTCH4  | KCTD12   | TNK2     | 0.2201          |

| Gene 1  | Gene 2  | Gene 3    | bresub<br>error | Gene 1   | Gene 2    | Gene 3    | bresub<br>error |
|---------|---------|-----------|-----------------|----------|-----------|-----------|-----------------|
| NFKB2   | PRKCH   | PROX1     | 0.2201          | FGFR1    | TLR2      | WNT5A     | 0.2206          |
| ITGB1   | KCTD12  | TNK2      | 0.2201          | IER3     | NR6A1     | PROX1     | 0.2206          |
| HOXA2   | CHI3L1  | PROX1     | 0.2201          | KCTD12   | LIG3      | TNFRSF10D | 0.2206          |
| BMP4    | SLC5A9  | NR6A1     | 0.2201          | NR6A1    | PECAM1    | TLR2      | 0.2207          |
| IL18    | MAML1   | SHH       | 0.2201          | KCTD12   | NOTCH1    | TNFRSF10D | 0.2207          |
| KEAP1   | PROX1   | TIMP3     | 0.2201          | PLS3     | CHI3L1    | PROX1     | 0.2207          |
| FAM129A | PROX1   | TLR3      | 0.2202          | SLC25A36 | KCTD12    | SPDEF     | 0.2208          |
| EPHB6   | KCTD12  | SLC7A7    | 0.2202          | SCNN1B   | NIFK      | PROX1     | 0.2208          |
| BMP4    | PRKCH   | PTK7      | 0.2202          | PRKCH    | SCNN1B    | PROX1     | 0.2208          |
| DDX11   | NR6A1   | PROX1     | 0.2202          | BCO2     | KCTD12    | SPDEF     | 0.2208          |
| PRKCH   | ADAMTS4 | CHI3L1    | 0.2202          | ICK      | KCTD12    | SPDEF     | 0.2208          |
| PRKCH   | PROX1   | PTPN11    | 0.2202          | IL18     | MAML1     | TTN       | 0.2208          |
| BMP4    | NFKB2   | NOS1      | 0.2202          | BMP4     | PRNP      | PROX1     | 0.2208          |
| PRKCH   | KEAP1   | PROX1     | 0.2203          | NR6A1    | REG1B     | WNT5A     | 0.2209          |
| HES1    | MAML1   | TDG       | 0.2203          | BMP4     | PTK7      | REG1B     | 0.2209          |
| KCTD12  | PECAM1  | PTPN22    | 0.2203          | IHH      | KCTD12    | TNK2      | 0.2209          |
| COL1A2  | NR6A1   | PROX1     | 0.2203          | HOXA13   | KCTD12    | TNFRSF10D | 0.2209          |
| KCTD12  | MMP1    | TNK2      | 0.2203          | ESR1     | KCTD12    | TNFRSF10D | 0.2209          |
| BMP4    | NR6A1   | PECAM1    | 0.2203          | IL18     | SLC4A4    | TNK2      | 0.2210          |
| CHI3L1  | PROX1   | PTPN11    | 0.2204          | KCTD12   | PTPN6     | SPDEF     | 0.2210          |
| KCTD12  | PTPN22  | TNFRSF10D | 0.2204          | PTGFRN   | NIFK      | PROX1     | 0.2210          |
| KCTD12  | PLA2G7  | TNK2      | 0.2204          | KCTD12   | TNFRSF10D | TSC2      | 0.2210          |
| CDK2AP1 | NIFK    | PROX1     | 0.2204          | HES1     | MYO9B     | TDG       | 0.2210          |
| KCTD12  | TFAP2C  | TNK2      | 0.2204          | HEY1     | KCTD12    | TNFRSF10D | 0.2210          |
| TGM2    | CHI3L1  | PROX1     | 0.2204          | AKTIP    | NR6A1     | PROX1     | 0.2210          |
| PRKCH   | ADAMTS4 | PROX1     | 0.2204          | BMP4     | NFKB2     | PRKCH     | 0.2210          |
| KCTD12  | NOS2    | TNK2      | 0.2204          | RBP4     | KCTD12    | SPDEF     | 0.2210          |
| BMP4    | RASSF1  | PROX1     | 0.2204          | BMP4     | NR6A1     | TLR3      | 0.2211          |
| BMP4    | TBRG1   | NR6A1     | 0.2204          | BMP4     | ITGB2     | WNT5A     | 0.2211          |
| IL1R2   | NR6A1   | PROX1     | 0.2204          | ANXA3    | CASP1     | PTGES     | 0.2211          |
| TGM2    | DCN     | PROX1     | 0.2205          | PRKCH    | ABCG5     | NR6A1     | 0.2211          |
| CHI3L1  | PROX1   | TFAP2A    | 0.2205          | KCTD12   | SLC23A3   | SPDEF     | 0.2211          |
| CA5B    | NR6A1   | PROX1     | 0.2205          | PRKCH    | NFKB1     | PROX1     | 0.2211          |
| IL18    | MAML1   | SLC4A4    | 0.2205          | KCTD12   | SLC7A7    | TNFRSF10A | 0.2211          |
| ELP3    | MAML1   | SPDEF     | 0.2205          | ID2      | NR6A1     | PROX1     | 0.2212          |
| HOXC6   | KCTD12  | TNFRSF10D | 0.2205          | CDK8     | MAML1     | XRCC6     | 0.2212          |
| NR6A1   | PROX1   | ZNF365    | 0.2206          | IL18     | MAML1     | SERPINA1  | 0.2212          |

| Gene 1  | Gene 2 | Gene 3    | bresub<br>error | Gene 1  | Gene 2 | Gene 3    | bresub<br>error |
|---------|--------|-----------|-----------------|---------|--------|-----------|-----------------|
| SLC39A5 | TGM2   | WNT5A     | 0.2212          | PROX1   | TIMP3  | ZNF365    | 0.2218          |
| HAS2    | NIFK   | PROX1     | 0.2213          | IL18    | TDG    | TLR2      | 0.2218          |
| CHI3L1  | PPAP2B | PROX1     | 0.2213          | PRKCH   | SLC5A9 | PROX1     | 0.2218          |
| CA14    | KCTD12 | TNFRSF10D | 0.2213          | NIFK    | PROX1  | TFAP2A    | 0.2218          |
| IL18    | MAML1  | XRCC6     | 0.2213          | BMP4    | NRCAM  | PROX1     | 0.2218          |
| HOXA10  | IL18   | TNK2      | 0.2213          | IER3    | PROX1  | TIMP3     | 0.2218          |
| IKBKB   | NIFK   | PROX1     | 0.2214          | ICAM1   | KCTD12 | TNFRSF10D | 0.2218          |
| BMP4    | NANOG  | WNT5A     | 0.2214          | KCTD12  | TLR5   | TNK2      | 0.2218          |
| AKTIP   | CHI3L1 | PROX1     | 0.2214          | NIFK    | PROX1  | SLC30A6   | 0.2219          |
| MAML1   | SREBF2 | TJP3      | 0.2214          | BMP4    | FGF18  | WNT5A     | 0.2219          |
| CHI3L1  | NIFK   | NR6A1     | 0.2214          | PCDH7   | KCTD12 | TNK2      | 0.2219          |
| CDCA7   | NIFK   | PROX1     | 0.2214          | BMP4    | TRAFD1 | WNT5A     | 0.2219          |
| XIST    | KCTD12 | TNK2      | 0.2214          | TDG     | TNK2   | XRCC6     | 0.2219          |
| IL18    | MAML1  | TJP3      | 0.2214          | UHRF1   | KCTD12 | TNK2      | 0.2219          |
| HOXC8   | KCTD12 | SPDEF     | 0.2214          | ITGAM   | KCTD12 | TNK2      | 0.2219          |
| NRCAM   | KCTD12 | TNK2      | 0.2215          | GSTM3   | KCTD12 | TNFRSF10D | 0.2219          |
| NR6A1   | PROX1  | REG1B     | 0.2215          | CA3     | KCTD12 | SPDEF     | 0.2219          |
| BMP4    | PROX1  | ZNF365    | 0.2215          | PRKCH   | DDR2   | PROX1     | 0.2219          |
| GABRB3  | KCTD12 | TNFRSF10D | 0.2215          | KCTD12  | SLC7A7 | TNFRSF10D | 0.2219          |
| HOXA13  | KCTD12 | TNK2      | 0.2215          | FOXP4   | KCTD12 | TNK2      | 0.2220          |
| KCTD12  | TNK2   | WNT3      | 0.2215          | KCTD12  | RBL2   | SPDEF     | 0.2220          |
| NIFK    | OGG1   | PROX1     | 0.2215          | HES1    | MYO9B  | SREBF2    | 0.2220          |
| KCTD12  | NOS2   | PTPN22    | 0.2216          | KCTD12  | NOTCH3 | TNK2      | 0.2220          |
| HOXD10  | KCTD12 | TNFRSF10D | 0.2216          | SLC39A5 | CHI3L1 | PROX1     | 0.2221          |
| ALPI    | KCTD12 | SPDEF     | 0.2216          | CEACAM3 | NR6A1  | PROX1     | 0.2221          |
| GCM1    | NIFK   | PROX1     | 0.2216          | HES1    | IL18   | PCNA      | 0.2221          |
| SLC3A1  | KCTD12 | TNK2      | 0.2216          | PRNP    | IL18   | TDG       | 0.2221          |
| ELP3    | KCTD12 | TNFRSF10D | 0.2216          | DDR2    | NIFK   | PROX1     | 0.2221          |
| BMP4    | CFTR   | WNT5A     | 0.2216          | RBL1    | KCTD12 | TNFRSF10D | 0.2221          |
| BMP4    | FN1    | WNT5A     | 0.2216          | HES1    | HOXA13 | IL18      | 0.2221          |
| HOXA2   | NIFK   | PROX1     | 0.2216          | BMP4    | PROX1  | SLC25A13  | 0.2221          |
| KCTD12  | SLC2A5 | TNFRSF10D | 0.2216          | GSTM3   | IL18   | TDG       | 0.2221          |
| EPHB6   | KCTD12 | TNFRSF10D | 0.2217          | HOXA13  | MAML1  | SREBF2    | 0.2221          |
| PRKCH   | SST    | PROX1     | 0.2217          | NIFK    | PROX1  | SLC2A2    | 0.2221          |
| HOXD13  | KCTD12 | TNFRSF10D | 0.2217          | IER3    | PROX1  | PTK7      | 0.2221          |
| CYP4F3  | NIFK   | PROX1     | 0.2218          | LPAR1   | KCTD12 | TNFRSF10D | 0.2221          |
| COL1A2  | ID2    | PROX1     | 0.2218          | DDX11   | IL18   | TDG       | 0.2221          |

| Gene 1 | Gene 2  | Gene 3    | bresub<br>error | Gene 1  | Gene 2 | Gene 3    | bresub<br>error |
|--------|---------|-----------|-----------------|---------|--------|-----------|-----------------|
| SLC4A4 | TDG     | TNK2      | 0.2222          | CHI3L1  | PROX1  | TNFRSF10A | 0.2224          |
| CHGA   | KCTD12  | TNFRSF10D | 0.2222          | KCTD12  | MAML1  | PDE6D     | 0.2224          |
| MAML1  | SREBF2  | XRCC6     | 0.2222          | CHI3L1  | NIFK   | PTGES     | 0.2224          |
| KCTD12 | MLH1    | TNFRSF10D | 0.2222          | NFKB2   | NIFK   | PROX1     | 0.2224          |
| RAD51D | KCTD12  | TNFRSF10D | 0.2222          | ELP3    | KCTD12 | SLC7A7    | 0.2224          |
| MELK   | KCTD12  | TNFRSF10D | 0.2222          | KCTD12  | MSH6   | TNFRSF10D | 0.2224          |
| CDH5   | KCTD12  | SPDEF     | 0.2222          | KCTD12  | NAIP   | TNFRSF10D | 0.2225          |
| PRKCH  | AKTIP   | PROX1     | 0.2222          | PRKCH   | PROX1  | TFAP2A    | 0.2225          |
| DAPK2  | KCTD12  | SPDEF     | 0.2222          | IL18    | NR6A1  | TDG       | 0.2225          |
| TLR4   | KCTD12  | TNFRSF10D | 0.2222          | UHRF1   | KCTD12 | TNFRSF10D | 0.2225          |
| ABCG5  | CHI3L1  | PROX1     | 0.2222          | MYC     | KCTD12 | TNFRSF10D | 0.2225          |
| CYP4F3 | NR6A1   | PROX1     | 0.2222          | NR6A1   | PROX1  | SLC2A2    | 0.2225          |
| KCTD12 | SLC13A2 | TNFRSF10D | 0.2222          | CDK7    | DDX11  | PROX1     | 0.2225          |
| MAML1  | SREBF2  | TTN       | 0.2222          | NR6A1   | TLR2   | WNT5A     | 0.2225          |
| PROX1  | PTPN11  | TIMP3     | 0.2222          | TLR4    | KCTD12 | SLC7A7    | 0.2226          |
| NIFK   | PROX1   | TLR3      | 0.2222          | NFKB2   | NR6A1  | WNT5A     | 0.2226          |
| IL18   | MAML1   | PRKCI     | 0.2223          | PRNP    | NIFK   | PROX1     | 0.2226          |
| CA13   | KCTD12  | TNK2      | 0.2223          | ELP3    | IL18   | TDG       | 0.2226          |
| ADAM17 | KCTD12  | TNFRSF10D | 0.2223          | KCTD12  | NR5A2  | SPDEF     | 0.2226          |
| NIFK   | PROX1   | WNT5A     | 0.2223          | GJC1    | KCTD12 | TNFRSF10D | 0.2226          |
| PPAP2A | KCTD12  | TNFRSF10D | 0.2223          | HOXA2   | CHI3L1 | NR6A1     | 0.2226          |
| SLC5A9 | NIFK    | PROX1     | 0.2223          | PRKCH   | DDX11  | ID2       | 0.2226          |
| RELB   | NR6A1   | PROX1     | 0.2223          | HOXD10  | KCTD12 | SLC7A7    | 0.2226          |
| HOXD13 | KCTD12  | NOS2      | 0.2223          | NR6A1   | PECAM1 | REL       | 0.2227          |
| NIFK   | NOG     | PROX1     | 0.2223          | SST     | NIFK   | PROX1     | 0.2227          |
| MAML1  | SLC4A4  | TDG       | 0.2223          | RBL1    | KCTD12 | NOS2      | 0.2227          |
| ALOX15 | KCTD12  | TNK2      | 0.2223          | SLC6A20 | NR6A1  | PROX1     | 0.2227          |
| LAMB1  | KCTD12  | TNK2      | 0.2224          | BMP4    | PRKCH  | DDX11     | 0.2227          |
| HOXD10 | KCTD12  | NOS2      | 0.2224          | CHI3L1  | PROX1  | PTK7      | 0.2227          |
| KCTD12 | MAB21L2 | TNFRSF10D | 0.2224          | SLC5A11 | KCTD12 | TNFRSF10D | 0.2227          |
| HES1   | MYO9B   | SLCO2A1   | 0.2224          | CDKN1C  | ID2    | PROX1     | 0.2227          |

**Table S8. Top 500 high-ENL Single-Gene LDA Classifiers.** The top 500 single-gene linear discriminant analysis classifiers and their respective misclassification rate in flaxseed lignan supplement vs placebo treatment in high-ENL excreters.

| Gene    | bresub<br>error | Gene      | bresub<br>error | Gene    | bresub<br>error | Gene    | bresub<br>error |
|---------|-----------------|-----------|-----------------|---------|-----------------|---------|-----------------|
| ANXA3   | 0.2454          | PLA2G4C   | 0.2966          | FOXP2   | 0.3194          | SAT2    | 0.3333          |
| NR6A1   | 0.2498          | CHI3L1    | 0.2968          | PKM     | 0.3201          | TTN     | 0.3334          |
| KCTD12  | 0.2521          | FOXO3     | 0.2975          | RUNX2   | 0.3203          | RAD52   | 0.3335          |
| EPHB1   | 0.2557          | SLC3A1    | 0.2984          | FOXK2   | 0.3204          | REG1B   | 0.3341          |
| PRKCH   | 0.2573          | HES1      | 0.2992          | ZNF365  | 0.3209          | SLC17A5 | 0.3342          |
| GCM1    | 0.2597          | HMGCS1    | 0.3021          | ADAMTS4 | 0.3222          | ID2     | 0.3345          |
| PTGIR   | 0.2626          | IL1R2     | 0.304           | SLC28A1 | 0.3224          | ANXA5   | 0.3347          |
| PROX1   | 0.2662          | SLC5A8    | 0.3041          | SORD    | 0.3225          | TIMP3   | 0.3347          |
| DLL1    | 0.2681          | PCNA      | 0.3044          | TRAFD1  | 0.3231          | SHH     | 0.3352          |
| PAX6    | 0.2687          | IL18      | 0.3079          | SLC35A2 | 0.3232          | SOX4    | 0.3353          |
| PARD3   | 0.2719          | CDCP1     | 0.3086          | HSD17B2 | 0.3234          | CAT     | 0.3355          |
| F11R    | 0.2732          | SLC20A1   | 0.3093          | PDE6D   | 0.324           | BMI1    | 0.3357          |
| PPAP2C  | 0.2732          | PRKAR1A   | 0.3097          | WNT5A   | 0.3244          | REL     | 0.3359          |
| ELP3    | 0.2801          | HDAC1     | 0.3115          | HOXD8   | 0.3247          | GCLC    | 0.3375          |
| NIFK    | 0.2802          | TNFRSF10A | 0.3116          | TNF     | 0.3257          | DDX5    | 0.339           |
| RHOB    | 0.2808          | TFAP2A    | 0.3117          | HOXB8   | 0.3262          | CCDC80  | 0.3394          |
| SLC50A1 | 0.2815          | BCL2      | 0.3121          | FGFBP1  | 0.3262          | ALDH1A1 | 0.3398          |
| NOS2    | 0.2828          | MSI2      | 0.3122          | SLC7A6  | 0.3266          | DAPK3   | 0.3401          |
| PTGFRN  | 0.2852          | CTDSPL    | 0.3126          | SREBF2  | 0.3266          | FAS     | 0.3403          |
| CD44    | 0.2869          | TFRC      | 0.3126          | VDR     | 0.3271          | SLC40A1 | 0.3403          |
| DFFA    | 0.2869          | TDG       | 0.3127          | SPDEF   | 0.3271          | SLC30A5 | 0.3407          |
| EIF6    | 0.2881          | GRB7      | 0.3129          | HMGB1   | 0.3274          | PLIN2   | 0.3411          |
| SLC6A14 | 0.2888          | HRH1      | 0.3131          | HIST3H3 | 0.3284          | PTPN11  | 0.3414          |
| MAPK8   | 0.2889          | TNK2      | 0.3133          | ILF3    | 0.3284          | PRSS23  | 0.3415          |
| PTGES   | 0.2909          | ACAT1     | 0.3135          | SLCO2A1 | 0.3286          | HOXA10  | 0.3429          |
| CHAC1   | 0.2919          | SLC39A4   | 0.3135          | MMP1    | 0.3287          | PLCD1   | 0.3436          |
| DPP4    | 0.292           | CDK15     | 0.3155          | BECN1   | 0.329           | PPAP2B  | 0.344           |
| SLC9A2  | 0.2935          | CYB5R1    | 0.3159          | PLS3    | 0.3292          | FDFT1   | 0.3446          |
| BMP4    | 0.294           | CDCA7     | 0.3173          | ABCC1   | 0.3308          | KEAP1   | 0.3447          |
| REG1A   | 0.2946          | KLF4      | 0.3177          | MUC4    | 0.3312          | ADAM9   | 0.3448          |
| LEF1    | 0.2959          | CD36      | 0.3184          | SLC4A4  | 0.3315          | CASP3   | 0.3448          |
| EFNB1   | 0.2963          | TFAP2C    | 0.3184          | BMPR2   | 0.332           | DUOX2   | 0.3449          |
| TJP3    | 0.2963          | GREM1     | 0.3186          | FN1     | 0.3325          | HMOX1   | 0.345           |
| COX4I1  | 0.2964          | MPC2      | 0.3186          | PTCH1   | 0.3332          | LCT     | 0.3463          |

| Gene     | bresub<br>error | Gene    | bresub<br>error | Gene      | bresub<br>error | Gene     | bresub<br>error |
|----------|-----------------|---------|-----------------|-----------|-----------------|----------|-----------------|
| BIRC5    | 0.3468          | DEFA5   | 0.3599          | PRKCI     | 0.3729          | SLC30A7  | 0.3872          |
| SLC7A7   | 0.347           | CA5B    | 0.3603          | SPRY2     | 0.3729          | DHFR     | 0.3873          |
| IL13RA1  | 0.3478          | PRKACB  | 0.3606          | TP53      | 0.3738          | ADRB1    | 0.3876          |
| HIF3A    | 0.3484          | BRD2    | 0.3607          | NTS       | 0.3746          | STK11    | 0.3876          |
| HNRNPA1  | 0.3486          | APOA1   | 0.3611          | KIT       | 0.3762          | MSH2     | 0.3879          |
| PPM1D    | 0.3487          | RASSF1  | 0.3613          | MAML1     | 0.3762          | PROM2    | 0.388           |
| SPPL3    | 0.3489          | LRIG1   | 0.3614          | CFLAR     | 0.3767          | GADD45A  | 0.3887          |
| SLC39A9  | 0.3489          | FAM129A | 0.3616          | SLC2A2    | 0.3768          | NOTCH3   | 0.3887          |
| EPHB4    | 0.3493          | COX5B   | 0.3619          | PPARD     | 0.3772          | EGF      | 0.3896          |
| COL1A1   | 0.3499          | FOXA1   | 0.3638          | BST1      | 0.3775          | CDK7     | 0.3908          |
| IGF2BP1  | 0.3505          | TSC22D3 | 0.3641          | FGFR1     | 0.3775          | EPHB6    | 0.3915          |
| STAT3    | 0.351           | SLC39A7 | 0.3643          | DUSP1     | 0.3794          | SLC16A9  | 0.3918          |
| GSTM3    | 0.3515          | ECM1    | 0.3654          | LATS2     | 0.3802          | SLC51A   | 0.3921          |
| CAMK2D   | 0.3517          | MUC2    | 0.3658          | XRCC6     | 0.3806          | CLDN8    | 0.3924          |
| CYP4F3   | 0.3517          | DPYSL3  | 0.3659          | BCL10     | 0.381           | HOXD10   | 0.3925          |
| NR3C1    | 0.352           | CDK8    | 0.3671          | LIG3      | 0.3816          | TPT1     | 0.3926          |
| CEACAM19 | 0.3529          | ITLN1   | 0.3672          | FGF18     | 0.3819          | ZDHHC20  | 0.3926          |
| PTPN22   | 0.3533          | TAT     | 0.3673          | SLC35D1   | 0.3826          | KLK1     | 0.393           |
| BAK1     | 0.3534          | PDE4C   | 0.3674          | YWHAH     | 0.3829          | AXIN2    | 0.393           |
| PLA2G4D  | 0.3535          | FGFR3   | 0.3675          | KITLG     | 0.3829          | POLG     | 0.3932          |
| CCL15    | 0.3539          | MYB     | 0.368           | GPX1      | 0.3833          | NEUROD1  | 0.3934          |
| ALPI     | 0.3546          | BMP2    | 0.3681          | RUNX3     | 0.3834          | DOT1L    | 0.3937          |
| AGPAT3   | 0.3551          | LYPLA1  | 0.3685          | TJP1      | 0.3835          | FOXJ3    | 0.3937          |
| WNT7A    | 0.3561          | ADAM10  | 0.3686          | HNF4G     | 0.3836          | SLC22A23 | 0.3938          |
| CA7      | 0.3562          | BCL2A1  | 0.3687          | LAMA1     | 0.3838          | ACKR2    | 0.394           |
| DEFA6    | 0.3565          | CHP1    | 0.3689          | IFNAR1    | 0.3846          | TYRO3    | 0.394           |
| AIFM2    | 0.3572          | SLC9A8  | 0.3695          | GADD45B   | 0.3847          | SERPINB2 | 0.3941          |
| DDX11    | 0.3576          | ARRB2   | 0.3698          | GABRB3    | 0.385           | PLA2G10  | 0.3944          |
| HOXB7    | 0.3577          | MAPK7   | 0.3698          | SLFN5     | 0.3852          | FOXA3    | 0.3944          |
| CAV1     | 0.3586          | PLAU    | 0.3699          | PTGS2     | 0.3855          | ABCG2    | 0.3949          |
| ABCG5    | 0.3593          | COLEC12 | 0.3701          | TNFRSF10B | 0.3856          | MMP9     | 0.395           |
| SLC38A2  | 0.3593          | MELK    | 0.3701          | DDR2      | 0.3858          | EPAS1    | 0.3959          |
| VIL1     | 0.3594          | CXCL16  | 0.3703          | FOXJ2     | 0.3864          | FFAR2    | 0.396           |
| CA4      | 0.3595          | SLC35B3 | 0.3709          | BACH1     | 0.3865          | AATF     | 0.3963          |
| OTUB1    | 0.3595          | HLTF    | 0.3711          | IL6ST     | 0.3865          | GEMIN6   | 0.3966          |
| ITGB2    | 0.3597          | PIWIL2  | 0.3723          | HMGCR     | 0.387           | BTD      | 0.3969          |
| SPI1     | 0.3598          | SCD     | 0.3726          | SELL      | 0.3871          | HOXC6    | 0.3969          |



| Gene     | bresub<br>error | Gene     | bresub<br>error | Gene     | bresub<br>error | Gene     | bresub<br>error |
|----------|-----------------|----------|-----------------|----------|-----------------|----------|-----------------|
| BCL2L11  | 0.397           | CD59     | 0.4099          | FASN     | 0.4189          | BMF      | 0.4275          |
| ERBB4    | 0.397           | SLC5A11  | 0.41            | NFIL3    | 0.4193          | MUC3A    | 0.4279          |
| APC      | 0.3972          | HHIP     | 0.4101          | SP1      | 0.4197          | SCP2     | 0.4283          |
| NCAM1    | 0.3974          | P4HB     | 0.4109          | NFKB2    | 0.4199          | CACNA1C  | 0.4284          |
| HDAC2    | 0.3976          | RELA     | 0.4113          | TNFRSF21 | 0.4202          | ATG16L1  | 0.429           |
| TFCP2L1  | 0.398           | REG4     | 0.4115          | TLR4     | 0.4204          | CA13     | 0.4291          |
| PLD3     | 0.3981          | AXIN1    | 0.4118          | JAK1     | 0.4205          | CASP4    | 0.4291          |
| OAT      | 0.3987          | PLAUR    | 0.4122          | ANXA1    | 0.4212          | GCLM     | 0.4293          |
| MAML3    | 0.3988          | CDX2     | 0.4123          | LRRK2    | 0.4213          | FLT1     | 0.4296          |
| GDF15    | 0.3994          | MLLT4    | 0.4125          | MAPK10   | 0.4213          | NOG      | 0.4296          |
| NPAT     | 0.3999          | GJB2     | 0.4126          | SPIB     | 0.4214          | SIRT1    | 0.4298          |
| HOXD13   | 0.4002          | CDK2     | 0.4127          | FABP6    | 0.4215          | TNFRSF1B | 0.431           |
| RBL2     | 0.4006          | CTNNA1   | 0.4129          | YWHAE    | 0.422           | CEACAM7  | 0.4312          |
| PARK7    | 0.4013          | S100A8   | 0.4132          | POLB     | 0.4222          | NUMB     | 0.4315          |
| SST      | 0.4017          | ILKAP    | 0.4133          | WNT3     | 0.4224          | CFTR     | 0.4316          |
| SLC9A3R1 | 0.4017          | TNFSF13B | 0.4133          | ILF2     | 0.4228          | SLC31A1  | 0.4318          |
| TLR2     | 0.4025          | COL6A3   | 0.4135          | SLC37A4  | 0.4228          | SFN      | 0.432           |
| SLC1A1   | 0.4029          | BAD      | 0.4136          | DNAJB6   | 0.423           | YAP1     | 0.432           |
| MEF2C    | 0.4033          | FOXO1    | 0.4147          | ALCAM    | 0.4233          | SLC30A6  | 0.4321          |
| SPP1     | 0.4039          | ODC1     | 0.4148          | LIFR     | 0.4234          | CDKAL1   | 0.4325          |
| SLC35A3  | 0.4048          | LGR4     | 0.4155          | NR2C2    | 0.4237          | SLC16A1  | 0.4334          |
| HPGD     | 0.4048          | NRCAM    | 0.4157          | WNT4     | 0.4238          | PRKCA    | 0.4348          |
| SLC30A4  | 0.4051          | PRKCD    | 0.4157          | MEP1A    | 0.4244          | MAB21L2  | 0.4349          |
| SLC25A33 | 0.4056          | ACSL4    | 0.4159          | SLC16A4  | 0.4248          | LAMP1    | 0.4352          |
| SLC39A5  | 0.4065          | BAX      | 0.4159          | PODXL    | 0.4249          | CA3      | 0.4353          |
| TNFRSF1A | 0.4068          | APEX1    | 0.4164          | NRIP1    | 0.425           | MAPK13   | 0.4355          |
| TPM3     | 0.4072          | HAS3     | 0.4164          | YWHAZ    | 0.4256          | ATG5     | 0.4358          |
| SLC38A1  | 0.4074          | DCN      | 0.4166          | ACADS    | 0.4257          | CD9      | 0.4359          |
| PECAM1   | 0.4077          | POU2F3   | 0.4167          | SLC23A3  | 0.4257          | GSN      | 0.436           |
| PYGO2    | 0.4079          | BBC3     | 0.4169          | MSH3     | 0.4258          | MYO9B    | 0.4366          |
| REG3A    | 0.408           | SLC7A9   | 0.4169          | SOD1     | 0.4258          | VIM      | 0.4368          |
| MGAT3    | 0.4082          | NOTCH4   | 0.4175          | FTH1     | 0.426           | CA14     | 0.4368          |
| MALL     | 0.4084          | AQP11    | 0.4178          | CDH5     | 0.4261          | RELB     | 0.4374          |
| GJC1     | 0.4086          | HMGCS2   | 0.4178          | PRKDC    | 0.4263          | LGALS3   | 0.4377          |
| ANGPTL4  | 0.4089          | PDK1     | 0.4181          | WNT2B    | 0.4264          | THRA     | 0.4385          |
| RBP4     | 0.4091          | C11orf30 | 0.4186          | SLC3A2   | 0.4269          | ATF4     | 0.4401          |
| MPC1     | 0.4091          | IL22RA1  | 0.4188          | MAP2K2   | 0.4271          | APOB     | 0.441           |

| Gene    | bresub<br>error | Gene     | bresub<br>error | Gene     | bresub<br>error | Gene    | bresub<br>error |
|---------|-----------------|----------|-----------------|----------|-----------------|---------|-----------------|
| PLAA    | 0.441           | RPS4X    | 0.4452          | FOXP1    | 0.4494          | AMPD3   | 0.4542          |
| PLA2G7  | 0.4416          | SLC25A20 | 0.4452          | HOXB6    | 0.4499          | HCAR2   | 0.4545          |
| YY1     | 0.4416          | TNFSF10  | 0.4454          | PRKCB    | 0.4502          | JUN     | 0.4545          |
| KDM4C   | 0.4419          | DUT      | 0.4455          | PLCB3    | 0.4507          | SDC1    | 0.4545          |
| NOTCH1  | 0.4424          | SLC34A2  | 0.4457          | IL2RG    | 0.4509          | BCL2L1  | 0.4546          |
| PTK2B   | 0.4427          | SEPTIN4  | 0.4457          | NANOG    | 0.4509          | PCDH7   | 0.4548          |
| SLC28A2 | 0.4429          | TLR3     | 0.4462          | PTPN6    | 0.4513          | SLC4A7  | 0.4549          |
| FZD7    | 0.4431          | MACC1    | 0.4463          | KCNH2    | 0.4514          | TGFA    | 0.4549          |
| RCN3    | 0.4434          | CDK2AP1  | 0.4463          | MEIS1    | 0.4515          | XIST    | 0.455           |
| NEU3    | 0.4438          | SYP      | 0.447           | CCL28    | 0.4517          | TNFAIP3 | 0.455           |
| BCL2L2  | 0.4441          | CA12     | 0.4473          | TSC2     | 0.4517          | EP400   | 0.4553          |
| RBL1    | 0.4442          | CKS2     | 0.4476          | PPARGC1A | 0.4519          | MXI1    | 0.4553          |
| CKAP4   | 0.4442          | SLC25A13 | 0.4478          | HOXB3    | 0.452           | ID3     | 0.4555          |
| YWHAB   | 0.4443          | TLR5     | 0.4482          | SOD2     | 0.4521          | CA1     | 0.4557          |
| LPAR4   | 0.4446          | FOS      | 0.4489          | CXCL2    | 0.4524          | NOS1    | 0.4558          |
| S100A9  | 0.4448          | FLNB     | 0.4491          | ERBB2    | 0.4532          | GNL1    | 0.456           |
| HSPD1   | 0.4449          | SLC5A9   | 0.4492          | HOXD1    | 0.4539          | PTPRD   | 0.4562          |

**Table S9. Top 500 high-ENL Two-Gene LDA Classifiers.** The top 500 two-gene linear discriminant analysis classifiers and their respective misclassification rate in flaxseed lignan supplement vs placebo treatment in high-ENL excretors.

| Gene 1  | Gene 2    | bresub error | Gene 1  | Gene 2    | bresub error |
|---------|-----------|--------------|---------|-----------|--------------|
| MMP1    | PTGIR     | 0.1568       | BCL2    | KCTD12    | 0.2018       |
| CYP4F3  | PTGIR     | 0.1721       | PTGIR   | TRAFD1    | 0.2019       |
| DLL1    | PTGIR     | 0.1729       | OTUB1   | DPYSL3    | 0.2020       |
| PLS3    | PTGIR     | 0.1741       | PPM1D   | KCTD12    | 0.2020       |
| FOXA1   | KCTD12    | 0.1770       | CYB5R1  | KCTD12    | 0.2021       |
| COX4I1  | SLC39A4   | 0.1785       | BMP4    | EPHB1     | 0.2024       |
| KCTD12  | MAPK13    | 0.1788       | BCL2L14 | PTGIR     | 0.2024       |
| KCTD12  | RBL2      | 0.1846       | KCTD12  | TNFRSF10B | 0.2025       |
| NR6A1   | PTGIR     | 0.1847       | SAT2    | KCTD12    | 0.2025       |
| VDR     | KCTD12    | 0.1848       | LCT     | PTGIR     | 0.2026       |
| CDKN1C  | KCTD12    | 0.1850       | ELP3    | SPDEF     | 0.2026       |
| PTGFRN  | KCTD12    | 0.1876       | DEFA5   | KCTD12    | 0.2027       |
| OTUB1   | PTGIR     | 0.1891       | DPP4    | DEFA5     | 0.2028       |
| DPP4    | SLC17A5   | 0.1895       | OTUB1   | PAX6      | 0.2028       |
| DPP4    | REG1A     | 0.1911       | PROX1   | PTGIR     | 0.2034       |
| KCTD12  | NOS2      | 0.1935       | GCM1    | KCTD12    | 0.2035       |
| DPP4    | MAPK13    | 0.1941       | GJC1    | KCTD12    | 0.2035       |
| DPP4    | SLC39A4   | 0.1942       | FOXA1   | TFAP2C    | 0.2036       |
| FGFR3   | KCTD12    | 0.1950       | KCTD12  | SLC2A5    | 0.2037       |
| COX4I1  | FOXO3     | 0.1951       | CSPG5   | KCTD12    | 0.2038       |
| REG1A   | SPDEF     | 0.1953       | DPP4    | VDR       | 0.2041       |
| DPP4    | TNFRSF10A | 0.1966       | DPEP1   | PTGIR     | 0.2045       |
| KCTD12  | SPDEF     | 0.1981       | PCDH7   | KCTD12    | 0.2049       |
| SLC39A5 | KCTD12    | 0.1989       | DPP4    | TFAP2C    | 0.2050       |
| CYB5R1  | TNFRSF10A | 0.1991       | KCTD12  | LIG3      | 0.2051       |
| KCTD12  | TFAP2C    | 0.1993       | COX4I1  | CTDSPL    | 0.2054       |
| CCL15   | KCTD12    | 0.1994       | GCM1    | PKM       | 0.2055       |
| DPP4    | PTGFRN    | 0.1996       | CDCA7   | KCTD12    | 0.2055       |
| OTUB1   | EPHB1     | 0.2002       | FOXO1   | KCTD12    | 0.2057       |
| FOXO3   | SLC39A4   | 0.2002       | KCTD12  | MEN1      | 0.2057       |
| BMP4    | OTUB1     | 0.2004       | PARD3   | PTGIR     | 0.2057       |
| KCTD12  | SORD      | 0.2008       | RBP4    | KCTD12    | 0.2058       |
| KCTD12  | THRA      | 0.2008       | KCTD12  | SLC28A1   | 0.2059       |
| KCTD12  | RELA      | 0.2014       | SLC50A1 | COX4I1    | 0.2059       |
| BST1    | OTUB1     | 0.2015       | CTDSPL  | KCTD12    | 0.2061       |

| Gene 1  | Gene 2    | bresub error |
|---------|-----------|--------------|
| COX4I1  | MAPK8     | 0.2061       |
| KCTD12  | MAB21L2   | 0.2062       |
| DPP4    | SPDEF     | 0.2063       |
| BMP4    | NR6A1     | 0.2063       |
| OTUB1   | CYP4F3    | 0.2065       |
| DEFA6   | KCTD12    | 0.2067       |
| AXIN2   | KCTD12    | 0.2067       |
| ELP3    | KCTD12    | 0.2068       |
| KCTD12  | MYO9B     | 0.2069       |
| GRB7    | KCTD12    | 0.2070       |
| BMP4    | GCM1      | 0.2071       |
| BMF     | PTGIR     | 0.2073       |
| PTGFRN  | CYB5R1    | 0.2083       |
| KCTD12  | SYN       | 0.2088       |
| KCTD12  | SPI1      | 0.2090       |
| BCL2L1  | KCTD12    | 0.2090       |
| DPP4    | ELP3      | 0.2090       |
| KCTD12  | KIT       | 0.2092       |
| FOXO3   | SLC30A5   | 0.2092       |
| F11R    | FOXO3     | 0.2093       |
| PTGIR   | WNT5A     | 0.2094       |
| SLC9A2  | TNFRSF10A | 0.2095       |
| SLC30A5 | SLC39A4   | 0.2095       |
| ELP3    | SLC39A4   | 0.2095       |
| ACSL4   | CYB5R1    | 0.2095       |
| KCTD12  | PTPN22    | 0.2096       |
| IL36RN  | PTGIR     | 0.2096       |
| GPX1    | KCTD12    | 0.2097       |
| BMP4    | PAX6      | 0.2097       |
| BMI1    | KCTD12    | 0.2099       |
| GSTA4   | KCTD12    | 0.2100       |
| SPDEF   | TFAP2C    | 0.2101       |
| PTGFRN  | TFAP2C    | 0.2103       |
| HOXD10  | KCTD12    | 0.2103       |
| BMP4    | MMP1      | 0.2104       |
| ACSL4   | KCTD12    | 0.2104       |
| KCTD12  | TSC2      | 0.2104       |
| CTDSPL  | TNFRSF10A | 0.2105       |

| Gene 1 | Gene 2    | bresub error |
|--------|-----------|--------------|
| KCTD12 | TNF       | 0.2109       |
| KCTD12 | PDE4C     | 0.2109       |
| OTUB1  | CDK15     | 0.2109       |
| DPP4   | SLC28A1   | 0.2110       |
| BMI1   | COX4I1    | 0.2110       |
| BECN1  | KCTD12    | 0.2111       |
| BCL2   | CYB5R1    | 0.2113       |
| DPP4   | FOXA3     | 0.2116       |
| AQP11  | KCTD12    | 0.2117       |
| CA14   | KCTD12    | 0.2119       |
| LEF1   | CYB5R1    | 0.2119       |
| KCTD12 | SLC39A4   | 0.2123       |
| DPP4   | CTDSPL    | 0.2125       |
| RB1    | KCTD12    | 0.2127       |
| PTGFRN | MAPK7     | 0.2128       |
| REG1A  | NOS2      | 0.2130       |
| COX4I1 | TTN       | 0.2131       |
| DPP4   | PDE4C     | 0.2132       |
| PTGFRN | PECAM1    | 0.2132       |
| KCTD12 | PCNA      | 0.2134       |
| IKBKAP | KCTD12    | 0.2135       |
| DUT    | KCTD12    | 0.2135       |
| ATP2A3 | KCTD12    | 0.2137       |
| DPP4   | SLC7A7    | 0.2137       |
| DEFA5  | TNFRSF10A | 0.2139       |
| DPP4   | HIST3H3   | 0.2140       |
| DPP4   | TFRC      | 0.2141       |
| CA7    | GCM1      | 0.2141       |
| GCM1   | LCT       | 0.2141       |
| EPHB6  | KCTD12    | 0.2142       |
| SLC9A2 | SPDEF     | 0.2143       |
| FGF9   | KCTD12    | 0.2143       |
| LPAR4  | KCTD12    | 0.2144       |
| SPDEF  | SPI1      | 0.2145       |
| GCM1   | PROX1     | 0.2145       |
| REG1A  | CTDSPL    | 0.2145       |
| ODC1   | PARD3     | 0.2146       |
| EPHB1  | PARD3     | 0.2146       |

| Gene 1  | Gene 2    | bresub error |
|---------|-----------|--------------|
| KCTD12  | TNFRSF10A | 0.2146       |
| SLC39A4 | TJP3      | 0.2147       |
| COX4I1  | SLC7A7    | 0.2148       |
| DLL1    | GCM1      | 0.2148       |
| DPP4    | TNK2      | 0.2148       |
| PPM1D   | SPDEF     | 0.2149       |
| MMP1    | PARD3     | 0.2150       |
| DOT1L   | MMP1      | 0.2150       |
| CCL15   | SLC30A5   | 0.2150       |
| KCTD12  | PSME2     | 0.2151       |
| SLC50A1 | FOXO3     | 0.2152       |
| CYB5R1  | TFAP2C    | 0.2153       |
| CDCA7   | CYB5R1    | 0.2153       |
| F11R    | DEFA5     | 0.2153       |
| DLL1    | MMP1      | 0.2154       |
| CYB5R1  | SLC28A1   | 0.2154       |
| KCTD12  | SLC2A2    | 0.2154       |
| BMI1    | TNFRSF10A | 0.2155       |
| SLC9A2  | KCTD12    | 0.2155       |
| KCTD12  | PAWR      | 0.2155       |
| GCM1    | KEAP1     | 0.2157       |
| MYO9B   | SPDEF     | 0.2158       |
| FGFR2   | KCTD12    | 0.2158       |
| XIST    | PTGIR     | 0.2159       |
| CYB5R1  | HMGCL     | 0.2159       |
| GCM1    | NIFK      | 0.2159       |
| LEF1    | KCTD12    | 0.2159       |
| CCL15   | TNFRSF10A | 0.2159       |
| BCL2    | DPP4      | 0.2160       |
| KCTD12  | MAML1     | 0.2160       |
| SLC2A5  | SPDEF     | 0.2160       |
| OTUB1   | PLD3      | 0.2161       |
| BECN1   | TNFRSF10A | 0.2161       |
| PRKCH   | EPHB1     | 0.2161       |
| PARD3   | PLD3      | 0.2161       |
| NRCAM   | KCTD12    | 0.2161       |
| PTGFRN  | CTDSPL    | 0.2161       |
| F11R    | SLC39A4   | 0.2161       |

| Gene 1 | Gene 2    | bresub error |
|--------|-----------|--------------|
| SDC1   | GCM1      | 0.2162       |
| KCTD12 | SLC38A2   | 0.2163       |
| DLL1   | NR6A1     | 0.2164       |
| OTUB1  | PROX1     | 0.2165       |
| RUNX2  | SLC39A4   | 0.2165       |
| DPP4   | KCTD12    | 0.2165       |
| BAK1   | PTGIR     | 0.2168       |
| IFITM2 | KCTD12    | 0.2169       |
| DPP4   | LEF1      | 0.2169       |
| CYP4F3 | EPHB1     | 0.2169       |
| FOXO3  | IL18      | 0.2170       |
| GABRB3 | PARD3     | 0.2170       |
| DPP4   | PDE6D     | 0.2171       |
| PTGFRN | CCL15     | 0.2172       |
| OTUB1  | GCM1      | 0.2172       |
| DEFA6  | TNFRSF10A | 0.2173       |
| KCTD12 | NOTCH1    | 0.2174       |
| BCL2   | MAPK7     | 0.2175       |
| DPP4   | BMI1      | 0.2176       |
| LEF1   | MAPK7     | 0.2177       |
| REG1A  | CCL15     | 0.2177       |
| EP400  | KCTD12    | 0.2177       |
| F11R   | CCL15     | 0.2177       |
| SORD   | TNFRSF10A | 0.2178       |
| REG1A  | CYB5R1    | 0.2180       |
| ANXA5  | GCM1      | 0.2180       |
| DPP4   | FOXO3     | 0.2180       |
| KCTD12 | MFSD2A    | 0.2181       |
| DPP4   | CCL28     | 0.2181       |
| SORD   | SPDEF     | 0.2182       |
| PRKCH  | PTGIR     | 0.2182       |
| PCDH7  | SPDEF     | 0.2183       |
| DLL1   | EPHB1     | 0.2183       |
| CYP4F3 | PLD3      | 0.2183       |
| GCM1   | ID2       | 0.2184       |
| ACSL4  | MAPK7     | 0.2185       |
| PRKCH  | DLL1      | 0.2185       |
| MMP1   | ODC1      | 0.2185       |

| Gene 1  | Gene 2   | bresub error |
|---------|----------|--------------|
| FOXA1   | FOXO3    | 0.2186       |
| CTDSPL  | IL18     | 0.2186       |
| FOXK2   | PTGIR    | 0.2186       |
| SLC17A5 | IL18     | 0.2187       |
| CYP4F3  | DFFA     | 0.2187       |
| KCTD12  | SLC1A4   | 0.2188       |
| PRKCH   | DFFA     | 0.2188       |
| BMP4    | CYP4F3   | 0.2189       |
| F11R    | SLC17A5  | 0.2191       |
| PTGFRN  | NOS2     | 0.2192       |
| REG1A   | PDE4C    | 0.2193       |
| CA14    | PTGIR    | 0.2193       |
| KCTD12  | TNFSF13B | 0.2193       |
| BIRC5   | PLD3     | 0.2194       |
| SLC50A1 | TJP3     | 0.2194       |
| PRKCH   | PAX6     | 0.2194       |
| KCTD12  | PLD3     | 0.2194       |
| DFFA    | PROX1    | 0.2195       |
| GCM1    | PLA2G4D  | 0.2195       |
| KCTD12  | SLC5A3   | 0.2195       |
| PARD3   | PAX6     | 0.2196       |
| MMP1    | PROX1    | 0.2196       |
| BMP4    | DFFA     | 0.2197       |
| ELP3    | PTGFRN   | 0.2197       |
| OTUB1   | ALPI     | 0.2198       |
| KCTD12  | ORMDL3   | 0.2199       |
| PLD3    | PROX1    | 0.2199       |
| REG1A   | MAPK7    | 0.2199       |
| KCTD12  | LMNB2    | 0.2200       |
| PARD3   | WNT5A    | 0.2201       |
| CDCP1   | SLC39A4  | 0.2201       |
| MMP1    | PLD3     | 0.2202       |
| CHAC1   | GCM1     | 0.2202       |
| RHOB    | SLC30A5  | 0.2202       |
| PPARD   | SLC9A2   | 0.2203       |
| KCTD12  | TNK2     | 0.2203       |
| EPHB1   | MMP1     | 0.2203       |
| GCM1    | PARD3    | 0.2204       |

| Gene 1  | Gene 2    | bresub error |
|---------|-----------|--------------|
| OTUB1   | WNT5A     | 0.2204       |
| EFNB1   | NR6A1     | 0.2205       |
| IL36RN  | KCTD12    | 0.2205       |
| PLA2G4C | DLL1      | 0.2205       |
| REG1A   | SLC28A1   | 0.2206       |
| ELP3    | DEFA5     | 0.2206       |
| CTDSPL  | SLC30A5   | 0.2206       |
| ILF3    | SLC39A4   | 0.2207       |
| NOS1    | MMP1      | 0.2208       |
| DAPK3   | PARD3     | 0.2209       |
| PTGIR   | PTPN11    | 0.2209       |
| OTUB1   | PTK7      | 0.2210       |
| NR6A1   | PARD3     | 0.2210       |
| AGPAT3  | KCTD12    | 0.2210       |
| FOXO3   | TJP3      | 0.2211       |
| DFFA    | PARD3     | 0.2211       |
| PARD3   | PTK7      | 0.2211       |
| CD36    | SLC39A4   | 0.2212       |
| FOXP2   | SLC39A4   | 0.2213       |
| HIF3A   | MMP1      | 0.2213       |
| BCL2    | PTGFRN    | 0.2213       |
| FOXA1   | IL18      | 0.2214       |
| BMP4    | ITGB2     | 0.2214       |
| BCL2L14 | KCTD12    | 0.2215       |
| SLC3A1  | ODC1      | 0.2215       |
| PTGFRN  | BMI1      | 0.2215       |
| CDCP1   | DEFA5     | 0.2216       |
| TNF     | TNFRSF10A | 0.2216       |
| PTGFRN  | PCNA      | 0.2216       |
| SLC3A1  | DLL1      | 0.2217       |
| KCTD12  | SLC22A23  | 0.2217       |
| LEF1    | CTDSPL    | 0.2217       |
| CYB5R1  | SPDEF     | 0.2218       |
| OTUB1   | DLL1      | 0.2218       |
| ELP3    | NOS2      | 0.2219       |
| KCTD12  | SLC4A7    | 0.2220       |
| DPP4    | LATS2     | 0.2221       |
| MMP1    | NR6A1     | 0.2221       |

| Gene 1  | Gene 2    | bresub error |
|---------|-----------|--------------|
| LEF1    | DEFA5     | 0.2221       |
| F11R    | RUNX2     | 0.2221       |
| AQP11   | SPDEF     | 0.2221       |
| MAP2K2  | KCTD12    | 0.2221       |
| AKTIP   | GCM1      | 0.2222       |
| COX4I1  | SLC7A6    | 0.2222       |
| REG1A   | DEFA5     | 0.2223       |
| GCM1    | MMP1      | 0.2223       |
| DPP4    | SLC9A2    | 0.2223       |
| SAT2    | SPDEF     | 0.2223       |
| F11R    | COX4I1    | 0.2223       |
| DPP4    | TNF       | 0.2223       |
| BECN1   | SPDEF     | 0.2224       |
| DAPK3   | DFFA      | 0.2224       |
| HES1    | IL18      | 0.2224       |
| BMP4    | DLL1      | 0.2224       |
| REG1A   | TNK2      | 0.2225       |
| PCNA    | SLC30A5   | 0.2225       |
| PLA2G4C | MMP1      | 0.2225       |
| DCN     | GCM1      | 0.2225       |
| ELP3    | CYB5R1    | 0.2225       |
| GABRB3  | PROX1     | 0.2226       |
| ELP3    | MAPK7     | 0.2226       |
| CYP4F3  | MMP1      | 0.2226       |
| IGF2    | KCTD12    | 0.2227       |
| NR6A1   | PLD3      | 0.2227       |
| F11R    | TNK2      | 0.2227       |
| GCM1    | PECAM1    | 0.2228       |
| JAK2    | KCTD12    | 0.2228       |
| EPHB1   | PROX1     | 0.2229       |
| OTUB1   | ODC1      | 0.2229       |
| KCTD12  | MMP1      | 0.2229       |
| MAPK7   | SLC28A1   | 0.2230       |
| GPX1    | SPDEF     | 0.2230       |
| PPM1D   | TNFRSF10A | 0.2230       |
| HIST3H3 | KCTD12    | 0.2230       |
| POLB    | KCTD12    | 0.2230       |
| PRKCH   | GCM1      | 0.2230       |

| Gene 1  | Gene 2    | bresub error |
|---------|-----------|--------------|
| KIT     | TNFRSF10A | 0.2230       |
| MAML1   | SLC39A4   | 0.2231       |
| DPP4    | SLC7A6    | 0.2232       |
| KCTD12  | PDE4B     | 0.2233       |
| IL1R2   | KCTD12    | 0.2234       |
| ITLN1   | SLC39A4   | 0.2234       |
| FOXA1   | SLC7A6    | 0.2234       |
| SLC34A2 | PTGIR     | 0.2234       |
| OTUB1   | EPHB4     | 0.2234       |
| FOXA1   | TDG       | 0.2235       |
| NR6A1   | TIMP3     | 0.2235       |
| LIG3    | TNFRSF10A | 0.2235       |
| DEFA6   | SPDEF     | 0.2236       |
| PRKCH   | PLD3      | 0.2236       |
| GCM1    | TIMP3     | 0.2237       |
| PCDH7   | SLC28A1   | 0.2237       |
| DPP4    | GADD45A   | 0.2238       |
| BMP4    | FOXJ2     | 0.2238       |
| MMP1    | PAX6      | 0.2238       |
| KCTD12  | NR5A2     | 0.2239       |
| PDE4C   | SLC30A5   | 0.2239       |
| DPP4    | CCL15     | 0.2239       |
| CHI3L1  | PROX1     | 0.2239       |
| KEAP1   | NR6A1     | 0.2239       |
| SLC17A5 | CDCP1     | 0.2240       |
| SLC39A4 | TDG       | 0.2240       |
| DPP4    | TFCP2L1   | 0.2241       |
| OTUB1   | MMP1      | 0.2241       |
| NR6A1   | ODC1      | 0.2241       |
| EPHB1   | FO XK2    | 0.2241       |
| CTDSPL  | TDG       | 0.2242       |
| FOXA1   | RUNX2     | 0.2242       |
| IER3    | PTGIR     | 0.2242       |
| HMGCL   | MAPK7     | 0.2242       |
| CYB5R1  | ICAM1     | 0.2242       |
| BECN1   | SLC28A1   | 0.2242       |
| SLC50A1 | HIST3H3   | 0.2242       |
| F11R    | MPC2      | 0.2243       |

| Gene 1  | Gene 2    | bresub error |
|---------|-----------|--------------|
| KCTD12  | SLC23A3   | 0.2243       |
| PRNP    | PTGIR     | 0.2243       |
| SLC28A1 | SORD      | 0.2244       |
| ELP3    | CTDSPL    | 0.2245       |
| BMP4    | DAPK3     | 0.2245       |
| KCTD12  | RAD52     | 0.2245       |
| PRKACB  | SLC39A4   | 0.2245       |
| COX4I1  | SHH       | 0.2246       |
| F11R    | HIST3H3   | 0.2246       |
| NR6A1   | PROX1     | 0.2246       |
| DEFA5   | SREBF2    | 0.2246       |
| REG1A   | KCTD12    | 0.2247       |
| SDC1    | NR6A1     | 0.2247       |
| OTUB1   | PECAM1    | 0.2248       |
| HDAC1   | TJP3      | 0.2248       |
| AIFM2   | KCTD12    | 0.2248       |
| RELA    | SPDEF     | 0.2248       |
| ACSL4   | DPP4      | 0.2249       |
| COX4I1  | KIT       | 0.2249       |
| GCM1    | NAA10     | 0.2249       |
| NOS2    | TFAP2C    | 0.2249       |
| PTGFRN  | SPDEF     | 0.2249       |
| F11R    | RHOB      | 0.2250       |
| RELA    | TNFRSF10A | 0.2250       |
| SLC17A5 | SREBF2    | 0.2250       |
| CHI3L1  | NR6A1     | 0.2250       |
| PRKCH   | WNT5A     | 0.2250       |
| SLC17A5 | KCTD12    | 0.2250       |
| DPP4    | CDCA7     | 0.2250       |
| NR6A1   | PKM       | 0.2251       |
| CTDSPL  | SLC28A1   | 0.2251       |
| BMP4    | KCTD12    | 0.2251       |
| NR2C2   | PTGIR     | 0.2251       |
| PARK7   | KCTD12    | 0.2251       |
| CHI3L1  | GCM1      | 0.2251       |
| FOXO3   | RUNX2     | 0.2252       |
| BMI1    | IL18      | 0.2252       |
| PTGFRN  | SORD      | 0.2252       |

| Gene 1  | Gene 2  | bresub error |
|---------|---------|--------------|
| CTDSPL  | SPDEF   | 0.2253       |
| DPP4    | GRB7    | 0.2253       |
| KCTD12  | P4HB    | 0.2253       |
| FOXA1   | HSD17B2 | 0.2254       |
| PPM1D   | PTGFRN  | 0.2254       |
| DEFA6   | SLC28A1 | 0.2254       |
| FOXA1   | SLC30A5 | 0.2254       |
| DPP4    | RELA    | 0.2254       |
| F11R    | FOXP2   | 0.2255       |
| EPHB1   | PTGIR   | 0.2255       |
| HES1    | MAPK8   | 0.2255       |
| MSI1    | EPHB1   | 0.2255       |
| ADAMTS4 | MMP1    | 0.2255       |
| KCTD12  | SLC51A  | 0.2255       |
| DPP4    | BECN1   | 0.2256       |
| PRKCH   | MMP1    | 0.2256       |
| GSTA4   | SPDEF   | 0.2256       |
| PPM1D   | NOS2    | 0.2256       |
| EPHB1   | IER3    | 0.2256       |
| SAT2    | TFAP2C  | 0.2256       |
| PCNA    | SLC28A1 | 0.2256       |
| CCL15   | TJP3    | 0.2256       |
| EFNB1   | GCM1    | 0.2257       |
| CCL15   | SREBF2  | 0.2257       |
| F11R    | TNF     | 0.2258       |
| KCTD12  | PIK3CA  | 0.2258       |
| F11R    | CD36    | 0.2258       |
| SLC39A4 | TTN     | 0.2258       |
| SLC10A2 | CYB5R1  | 0.2259       |
| ELP3    | TNK2    | 0.2259       |
| NIFK    | NR6A1   | 0.2259       |
| PTAFR   | KCTD12  | 0.2259       |
| HOXB8   | OTUB1   | 0.2259       |
| EPHB1   | TIMP3   | 0.2259       |
| LEF1    | BECN1   | 0.2260       |
| IL18    | SLC39A4 | 0.2260       |
| HCAR2   | KCTD12  | 0.2260       |
| HMGCS1  | KCTD12  | 0.2260       |



| Gene 1  | Gene 2    | bresub error |
|---------|-----------|--------------|
| LEF1    | REG1A     | 0.2260       |
| MMP1    | ZNF365    | 0.2261       |
| ELP3    | HIST3H3   | 0.2261       |
| SLC39A4 | SREBF2    | 0.2261       |
| DPP4    | COX4I1    | 0.2261       |
| F11R    | MAPK8     | 0.2262       |
| BMP4    | SLC3A1    | 0.2262       |
| KCTD12  | SLC1A1    | 0.2262       |
| LCT     | NR6A1     | 0.2262       |
| DPP4    | PCNA      | 0.2262       |
| FOXO3   | PRKAR1A   | 0.2262       |
| G6PD    | KCTD12    | 0.2262       |
| SPDEF   | TNFRSF10B | 0.2263       |
| BMI1    | SLC30A5   | 0.2263       |
| PLA2G4C | CHI3L1    | 0.2263       |
| OTUB1   | GABRB3    | 0.2264       |
| PCNA    | SPDEF     | 0.2264       |
| CA7     | NR6A1     | 0.2264       |
| PCNA    | TJP3      | 0.2264       |
| CDCA7   | MAPK7     | 0.2264       |
| RHOB    | TJP3      | 0.2264       |
| COL3A1  | PTGIR     | 0.2264       |
| CYB5R1  | TLR3      | 0.2266       |
| KCTD12  | PECAM1    | 0.2266       |
| DPP4    | MAPK8     | 0.2267       |

| Gene 1  | Gene 2    | bresub error |
|---------|-----------|--------------|
| FOXK2   | PLD3      | 0.2267       |
| SLC17A5 | RUNX2     | 0.2267       |
| FOXD2   | KCTD12    | 0.2267       |
| F11R    | TDG       | 0.2267       |
| MAPK7   | TFAP2C    | 0.2267       |
| SYP     | TNFRSF10A | 0.2268       |
| KCTD12  | MUC19     | 0.2268       |
| CAT     | SLC39A4   | 0.2268       |
| BMP4    | PARD3     | 0.2268       |
| CDK8    | DPP4      | 0.2268       |
| KCTD12  | MAPK7     | 0.2269       |
| F11R    | TFRC      | 0.2269       |
| SLC3A1  | PARD3     | 0.2269       |
| ANGPTL4 | GCM1      | 0.2269       |
| FOXO1   | TFAP2C    | 0.2269       |
| BMI1    | TJP3      | 0.2269       |
| SLC39A4 | TFRC      | 0.2270       |
| BECN1   | IL18      | 0.2270       |
| EPHB1   | PPAP2B    | 0.2270       |
| LEF1    | PCNA      | 0.2271       |
| MSI1    | PTGIR     | 0.2271       |
| COX4I1  | SLCO2A1   | 0.2271       |
| BMI1    | SLC28A1   | 0.2272       |
| MAB21L2 | TNFRSF10A | 0.2272       |
| DFFA    | DLL1      | 0.2272       |

**Table S10. Top 500 high-ENL Three-Gene LDA Classifiers.** The top 500 three-gene linear discriminant analysis classifiers and their respective misclassification rate in flaxseed lignan supplement vs placebo treatment in high-ENL excreters.

| Gene 1   | Gene 2  | Gene 3  | bresub<br>error | Gene 1  | Gene 2  | Gene 3  | bresub<br>error |
|----------|---------|---------|-----------------|---------|---------|---------|-----------------|
| NRCAM    | GCM1    | MMP1    | 0.1157          | DPP4    | REG1A   | MAPK13  | 0.1460          |
| NRCAM    | MMP1    | PLD3    | 0.1282          | DPEP1   | MMP1    | PTGIR   | 0.1460          |
| CA14     | GCM1    | MMP1    | 0.1291          | BST1    | MMP1    | PLD3    | 0.1460          |
| OTUB1    | CYP4F3  | PTGIR   | 0.1296          | OTUB1   | MMP1    | PTGIR   | 0.1465          |
| GCM1     | MMP1    | PECAM1  | 0.1298          | AQP11   | DPP4    | MAPK13  | 0.1472          |
| BMP4     | GCM1    | MMP1    | 0.1331          | ESR1    | MMP1    | PTGIR   | 0.1473          |
| COX4I1   | FOXO3   | SLC39A4 | 0.1340          | DPP4    | ELP3    | MAPK13  | 0.1476          |
| DLL1     | MMP1    | PTGIR   | 0.1342          | SLC34A2 | DLL1    | PTGIR   | 0.1476          |
| MMP1     | PTGIR   | WNT5A   | 0.1346          | KCTD12  | MEN1    | RBL2    | 0.1478          |
| CYP4F3   | MMP1    | PTGIR   | 0.1375          | DPP4    | DEFA5   | MAPK13  | 0.1478          |
| DLL1     | GCM1    | MMP1    | 0.1377          | OTUB1   | PLS3    | PTGIR   | 0.1480          |
| CYP4F3   | NR6A1   | PTGIR   | 0.1380          | PTGFRN  | KCTD12  | RBL2    | 0.1481          |
| GABRB3   | MMP1    | PTGIR   | 0.1385          | PLS3    | ITGB1   | PTGIR   | 0.1482          |
| FOXA1    | KCTD12  | TFAP2C  | 0.1387          | LPAR1   | MMP1    | PTGIR   | 0.1484          |
| SLC34A2  | MMP1    | PTGIR   | 0.1394          | GCM1    | MMP1    | TSC2    | 0.1485          |
| SLC3A1   | MMP1    | PTGIR   | 0.1410          | TBRG1   | MMP1    | PTGIR   | 0.1487          |
| SLC34A2  | CYP4F3  | PTGIR   | 0.1413          | DHFR    | MMP1    | PTGIR   | 0.1489          |
| FOXJ2    | MMP1    | PTGIR   | 0.1413          | NRCAM   | SLC39A5 | MMP1    | 0.1489          |
| XIST     | DLL1    | PTGIR   | 0.1413          | PLS3    | PROX1   | PTGIR   | 0.1489          |
| DPP4     | SLC9A2  | VDR     | 0.1414          | COL3A1  | DLL1    | PTGIR   | 0.1491          |
| SST      | CYP4F3  | PTGIR   | 0.1417          | ITGB2   | CYP4F3  | PTGIR   | 0.1491          |
| DLL1     | NR6A1   | PTGIR   | 0.1434          | PRNP    | MMP1    | PTGIR   | 0.1491          |
| KCTD12   | NOS2    | RBL2    | 0.1434          | MMP1    | NR6A1   | PTGIR   | 0.1495          |
| COX4I1   | SLC39A4 | TFCP2L1 | 0.1443          | LEF1    | KCTD12  | RBL2    | 0.1496          |
| IL36RN   | DLL1    | PTGIR   | 0.1450          | CDKN1C  | KCTD12  | SLC28A1 | 0.1496          |
| ISL1     | MMP1    | PTGIR   | 0.1451          | DPEP1   | CYP4F3  | PTGIR   | 0.1497          |
| CYP4F3   | FGF18   | PTGIR   | 0.1452          | DPP4    | REG1A   | VDR     | 0.1497          |
| CYP4F3   | ITGB1   | PTGIR   | 0.1453          | OTUB1   | DLL1    | PTGIR   | 0.1498          |
| CYP4F3   | FOXK2   | PTGIR   | 0.1453          | XIST    | CYP4F3  | PTGIR   | 0.1499          |
| IL36RN   | CYP4F3  | PTGIR   | 0.1453          | DPP4    | SLFN5   | VDR     | 0.1501          |
| PTGFRN   | KCTD12  | MAPK13  | 0.1453          | DLL1    | ITGB1   | PTGIR   | 0.1505          |
| CEACAM19 | MMP1    | PTGIR   | 0.1455          | GCM1    | MMP1    | PTGIR   | 0.1505          |

| Gene 1 | Gene 2 | Gene 3  | bresub<br>error | Gene 1  | Gene 2  | Gene 3    | bresub<br>error |
|--------|--------|---------|-----------------|---------|---------|-----------|-----------------|
| CYP4F3 | DAPK3  | PTGIR   | 0.1505          | PTGFRN  | CDKN1C  | KCTD12    | 0.1537          |
| MMP1   | PLD3   | PTGIR   | 0.1507          | HAS2    | MMP1    | PTGIR     | 0.1538          |
| XIST   | MMP1   | PTGIR   | 0.1507          | CCDC80  | MMP1    | PTGIR     | 0.1539          |
| DPP4   | PTGFRN | MAPK13  | 0.1509          | KCTD12  | LRIG1   | RBL2      | 0.1540          |
| CDKN1C | KCTD12 | PTPN22  | 0.1511          | BCL2    | KCTD12  | MAPK13    | 0.1541          |
| CA14   | MMP1   | PTGIR   | 0.1511          | CYP4F3  | MAPK13  | PTGIR     | 0.1541          |
| PLS3   | MMP1   | PTGIR   | 0.1514          | PLS3    | PTGIR   | TRAFD1    | 0.1542          |
| ITGB2  | DLL1   | PTGIR   | 0.1515          | BMF     | NR6A1   | PTGIR     | 0.1542          |
| FPR1   | MMP1   | PTGIR   | 0.1515          | MMP1    | PTGIR   | SLC28A1   | 0.1543          |
| RBP4   | ACADS  | KCTD12  | 0.1516          | PPAP2A  | MMP1    | PTGIR     | 0.1543          |
| BCL2   | KCTD12 | RBL2    | 0.1517          | COX4I1  | CTDSPL  | SLC39A4   | 0.1543          |
| PLS3   | EPHB1  | PTGIR   | 0.1518          | PTGFRN  | FGFR3   | KCTD12    | 0.1544          |
| PRNP   | CYP4F3 | PTGIR   | 0.1519          | GCM1    | MMP1    | PLA2G7    | 0.1544          |
| BMP4   | MMP1   | PTGIR   | 0.1520          | MSI1    | CYP4F3  | PTGIR     | 0.1545          |
| DPP4   | HMGCS1 | MAPK13  | 0.1521          | ILKAP   | MMP1    | PTGIR     | 0.1545          |
| PTGFRN | GCM1   | KCTD12  | 0.1521          | RBP4    | MMP1    | PTGIR     | 0.1546          |
| COL3A1 | MMP1   | PTGIR   | 0.1522          | KCTD12  | RBL2    | SLC28A1   | 0.1546          |
| IGF1   | MMP1   | PTGIR   | 0.1525          | AQP11   | KCTD12  | MAPK13    | 0.1549          |
| ACSL4  | KCTD12 | RBL2    | 0.1526          | BCL2L14 | DLL1    | PTGIR     | 0.1549          |
| LPAR1  | CYP4F3 | PTGIR   | 0.1527          | BCL2L14 | SLC34A2 | PTGIR     | 0.1550          |
| CYP4F3 | GCM1   | MMP1    | 0.1527          | CYP4F3  | MMP1    | PLD3      | 0.1550          |
| DPP4   | MAPK13 | SLC39A4 | 0.1528          | SLC9A2  | KCTD12  | TNFRSF10A | 0.1551          |
| ITGB2  | MMP1   | PTGIR   | 0.1528          | CSPG5   | MMP1    | PTGIR     | 0.1551          |
| CDCA7  | KCTD12 | RBL2    | 0.1528          | PRKAR1B | MMP1    | PTGIR     | 0.1551          |
| IL36RN | MMP1   | PTGIR   | 0.1528          | DLL1    | MEN1    | PTGIR     | 0.1551          |
| CYP4F3 | EPHB4  | PTGIR   | 0.1528          | IL36RN  | NR6A1   | PTGIR     | 0.1551          |
| ITGAL  | MMP1   | PTGIR   | 0.1532          | COX4I1  | IFNAR1  | SLC39A4   | 0.1552          |
| CYP4F3 | EPHB1  | PTGIR   | 0.1533          | EPHB6   | MMP1    | PTGIR     | 0.1554          |
| BAK1   | NR6A1  | PTGIR   | 0.1533          | BST1    | MMP1    | PTGIR     | 0.1554          |
| DLL1   | EPHB1  | PTGIR   | 0.1533          | DPP4    | COX4I1  | SLC39A4   | 0.1555          |
| PRNP   | DLL1   | PTGIR   | 0.1533          | DAPK3   | DLL1    | PTGIR     | 0.1557          |
| PLS3   | FOXK2  | PTGIR   | 0.1533          | LEF1    | FOXA1   | KCTD12    | 0.1557          |
| DPEP1  | DLL1   | PTGIR   | 0.1533          | FGFR1   | MMP1    | PTGIR     | 0.1558          |
| GCM1   | MMP1   | REL     | 0.1533          | DPEP1   | PLS3    | PTGIR     | 0.1559          |
| LPAR1  | DLL1   | PTGIR   | 0.1536          | CYP4F3  | PTGIR   | TSC2      | 0.1559          |
| EPHB1  | MMP1   | PTGIR   | 0.1536          | MMP1    | PECAM1  | PTGIR     | 0.1560          |
| MAPK14 | MMP1   | PTGIR   | 0.1537          | PTGFRN  | KCTD12  | MEN1      | 0.1561          |

| Gene 1  | Gene 2  | Gene 3  | bresub<br>error | Gene 1 | Gene 2 | Gene 3    | bresub<br>error |
|---------|---------|---------|-----------------|--------|--------|-----------|-----------------|
| REG1A   | SLC28A1 | SPDEF   | 0.1561          | NRCAM  | AIFM2  | KCTD12    | 0.1584          |
| SLFN5   | VDR     | KCTD12  | 0.1562          | MMP1   | PTGIR  | TAT       | 0.1584          |
| NR6A1   | PROX1   | PTGIR   | 0.1562          | CYP4F3 | GCM1   | PTGIR     | 0.1585          |
| BCL2L14 | MMP1    | PTGIR   | 0.1563          | DLL1   | PAX6   | PTGIR     | 0.1585          |
| MEN1    | MMP1    | PTGIR   | 0.1563          | NR6A1  | PARD3  | PTGIR     | 0.1586          |
| WNT4    | MMP1    | PTGIR   | 0.1564          | AIFM2  | MMP1   | PTGIR     | 0.1586          |
| EPHB4   | MMP1    | PTGIR   | 0.1564          | MSI1   | DLL1   | PTGIR     | 0.1586          |
| DPP4    | ELP3    | VDR     | 0.1567          | FOXK2  | NR6A1  | PTGIR     | 0.1587          |
| KCTD12  | MAPK13  | SLC28A1 | 0.1567          | TGFB2  | MMP1   | PTGIR     | 0.1589          |
| SLC35A2 | COX4I1  | SLC39A4 | 0.1567          | KDM4A  | MMP1   | PTGIR     | 0.1590          |
| MMP1    | PAX6    | PTGIR   | 0.1568          | LCT    | NR6A1  | PTGIR     | 0.1591          |
| DLL1    | GCM1    | MMP9    | 0.1569          | RASSF1 | MMP1   | PTGIR     | 0.1591          |
| DDX11   | MMP1    | PTGIR   | 0.1569          | SLC9A2 | KCTD12 | TFAP2C    | 0.1592          |
| GPX1    | KCTD12  | RBL2    | 0.1570          | NRCAM  | PPARD  | SLC9A2    | 0.1592          |
| PTGFRN  | KCTD12  | TFAP2C  | 0.1571          | CYP4F3 | PAX6   | PTGIR     | 0.1592          |
| AQP11   | KCTD12  | RBL2    | 0.1571          | HOXD8  | MMP1   | PTGIR     | 0.1594          |
| CYP4F3  | ILKAP   | PTGIR   | 0.1571          | NRCAM  | MMP1   | ODC1      | 0.1594          |
| BIRC5   | CYP4F3  | PTGIR   | 0.1572          | CYP4F3 | GABRB3 | PTGIR     | 0.1594          |
| PLS3    | PAX6    | PTGIR   | 0.1573          | HOXA2  | DLL1   | PTGIR     | 0.1594          |
| OTUB1   | EPHB4   | PTGIR   | 0.1573          | DLL1   | FOXK2  | PTGIR     | 0.1594          |
| SLC9A2  | CYP4F3  | PTGIR   | 0.1573          | BMF    | PLS3   | PTGIR     | 0.1595          |
| PLS3    | FGF18   | PTGIR   | 0.1575          | GCM1   | KCTD12 | NOS2      | 0.1595          |
| GCM1    | KCTD12  | SLC28A1 | 0.1575          | DUT    | GCM1   | MMP1      | 0.1595          |
| CYP4F3  | MEN1    | PTGIR   | 0.1576          | MMP1   | PTGIR  | TNFRSF10D | 0.1596          |
| KCTD12  | LRIG1   | MAPK13  | 0.1577          | SLC3A1 | CYP4F3 | PTGIR     | 0.1596          |
| VDR     | KCTD12  | NOG     | 0.1577          | COX4I1 | KIT    | SLC39A4   | 0.1597          |
| MMP1    | PTGIR   | PTK7    | 0.1578          | FOXJ2  | NR6A1  | PTGIR     | 0.1597          |
| FGFR3   | KCTD12  | TFAP2C  | 0.1578          | DPP4   | PTGFRN | REG1A     | 0.1597          |
| KCTD12  | RBL2    | SLC2A5  | 0.1579          | HOXA9  | MMP1   | PTGIR     | 0.1598          |
| PLS3    | DFFA    | PTGIR   | 0.1580          | CDKN1C | KCTD12 | SPDEF     | 0.1599          |
| CCL15   | COX4I1  | SLC39A4 | 0.1581          | KCTD12 | MAPK13 | TNFRSF10B | 0.1599          |
| KCTD12  | SLC28A1 | SPDEF   | 0.1582          | DPEP1  | VDR    | KCTD12    | 0.1599          |
| IGF1    | DLL1    | PTGIR   | 0.1582          | HOXD1  | NR6A1  | PTGIR     | 0.1600          |
| BRIX1   | MMP1    | PTGIR   | 0.1583          | GRB7   | KCTD12 | RBL2      | 0.1601          |
| SST     | DLL1    | PTGIR   | 0.1583          | HSPD1  | CYP4F3 | PTGIR     | 0.1601          |
| CEACAM3 | MMP1    | PTGIR   | 0.1583          | DPP4   | MAPK13 | SORD      | 0.1601          |
| FOXA1   | KCTD12  | SLC28A1 | 0.1584          | PTGFRN | KCTD12 | SPDEF     | 0.1602          |

| Gene 1   | Gene 2 | Gene 3  | bresub<br>error | Gene 1  | Gene 2 | Gene 3  | bresub<br>error |
|----------|--------|---------|-----------------|---------|--------|---------|-----------------|
| CCDC80   | PLS3   | PTGIR   | 0.1602          | CCDC80  | CYP4F3 | PTGIR   | 0.1614          |
| SLC9A2   | KCTD12 | SPDEF   | 0.1602          | NRCAM   | MMP1   | PTGIR   | 0.1614          |
| XIST     | NR6A1  | PTGIR   | 0.1602          | BCL2L14 | CYP4F3 | PTGIR   | 0.1615          |
| ABCC1    | MMP1   | PTGIR   | 0.1602          | DLL1    | FGF18  | PTGIR   | 0.1615          |
| DAPK3    | MMP1   | PTGIR   | 0.1603          | PTGFRN  | CA14   | KCTD12  | 0.1615          |
| KCTD12   | MAPK13 | TFAP2C  | 0.1603          | ACSL4   | MMP1   | PTGIR   | 0.1616          |
| COX4I1   | MAML1  | SLC39A4 | 0.1604          | PTGFRN  | ALPI   | KCTD12  | 0.1616          |
| LPAR1    | PLS3   | PTGIR   | 0.1604          | OTUB1   | DLL1   | GCM1    | 0.1616          |
| DPP4     | REG1A  | TFAP2C  | 0.1605          | ISL1    | DLL1   | PTGIR   | 0.1616          |
| PLS3     | DAPK3  | PTGIR   | 0.1605          | SLC35B3 | COX4I1 | SLC39A4 | 0.1616          |
| KCTD12   | MEN1   | SPDEF   | 0.1605          | MMP1    | PTGIR  | RCN3    | 0.1617          |
| FGF5     | MMP1   | PTGIR   | 0.1605          | DPP4    | ELP3   | PTGFRN  | 0.1618          |
| IER3     | NR6A1  | PTGIR   | 0.1606          | CDCA7   | KCTD12 | MAPK13  | 0.1618          |
| PRKCH    | CYP4F3 | PTGIR   | 0.1607          | CAV1    | KCTD12 | RBL2    | 0.1618          |
| SLC39A5  | MMP1   | PTGIR   | 0.1607          | FGFR3   | KCTD12 | SLC28A1 | 0.1618          |
| CYP4F3   | PTGIR  | PTK2    | 0.1609          | ITGAL   | DLL1   | PTGIR   | 0.1619          |
| PTGFRN   | KCTD12 | NOS2    | 0.1609          | NR6A1   | PTGIR  | PTPN11  | 0.1619          |
| GCM1     | KCTD12 | SPDEF   | 0.1609          | DPP4    | BMI1   | MAPK13  | 0.1619          |
| FOXA1    | KCTD12 | PLD3    | 0.1609          | ACADS   | KCTD12 | PECAM1  | 0.1619          |
| DPP4     | REG1A  | TSC2    | 0.1609          | NRCAM   | KCTD12 | NOS2    | 0.1620          |
| POR      | CYP4F3 | PTGIR   | 0.1610          | HEY1    | MMP1   | PTGIR   | 0.1620          |
| PLS3     | BIRC5  | PTGIR   | 0.1610          | ERBB4   | MMP1   | PTGIR   | 0.1620          |
| IGF1     | CYP4F3 | PTGIR   | 0.1610          | KLK6    | MMP1   | PTGIR   | 0.1621          |
| NFKB2    | MMP1   | PTGIR   | 0.1611          | DLL1    | MMP1   | PLD3    | 0.1621          |
| BCL2     | KCTD12 | SPDEF   | 0.1611          | PLS3    | GCM1   | PTGIR   | 0.1621          |
| CACNA2D1 | MMP1   | PTGIR   | 0.1611          | PLS3    | MEN1   | PTGIR   | 0.1622          |
| COX4I1   | PDK1   | SLC39A4 | 0.1611          | ELP3    | GCM1   | KCTD12  | 0.1623          |
| DPP4     | FOXA1  | MAPK13  | 0.1611          | FPR1    | VDR    | KCTD12  | 0.1624          |
| RBL1     | MMP1   | PTGIR   | 0.1612          | CDCA7   | CDKN1C | KCTD12  | 0.1624          |
| ABCG5    | MMP1   | PTGIR   | 0.1612          | SAT2    | KCTD12 | MAPK13  | 0.1625          |
| CDCA7    | GCM1   | KCTD12  | 0.1612          | WNT4    | DLL1   | PTGIR   | 0.1625          |
| MMP1     | POU2F3 | PTGIR   | 0.1612          | EPHB6   | FOXA1  | KCTD12  | 0.1625          |
| BCL2L14  | NR6A1  | PTGIR   | 0.1612          | DPP4    | SLC9A2 | MAPK13  | 0.1626          |
| KCTD12   | NOS2   | SLC28A1 | 0.1612          | MMP1    | PTGIR  | RBBP9   | 0.1626          |
| DLL1     | PTGIR  | WNT5A   | 0.1613          | HOXA2   | MMP1   | PTGIR   | 0.1626          |
| NR6A1    | PTGIR  | WNT5A   | 0.1613          | NOTCH4  | MMP1   | PTGIR   | 0.1626          |
| NRCAM    | MMP1   | PTK7    | 0.1613          | PLS3    | FOXJ2  | PTGIR   | 0.1626          |

| Gene 1  | Gene 2  | Gene 3   | bresub<br>error | Gene 1  | Gene 2  | Gene 3    | bresub<br>error |
|---------|---------|----------|-----------------|---------|---------|-----------|-----------------|
| DPP4    | MAPK13  | TNF      | 0.1626          | OTUB1   | PROX1   | PTGIR     | 0.1639          |
| PTGFRN  | GRB7    | KCTD12   | 0.1627          | BCL2    | KCTD12  | TFAP2C    | 0.1640          |
| KCTD12  | MALL    | RBL2     | 0.1627          | NPAT    | CYP4F3  | PTGIR     | 0.1640          |
| PTGFRN  | KCTD12  | LRIG1    | 0.1627          | FOXP4   | MMP1    | PTGIR     | 0.1640          |
| PTGFRN  | KCTD12  | SLC23A3  | 0.1627          | APEX1   | MMP1    | PTGIR     | 0.1640          |
| PARD3   | PTGIR   | TRAFD1   | 0.1627          | CYP4F3  | GCM1    | MMP9      | 0.1641          |
| MMP1    | NAIP    | PTGIR    | 0.1627          | DPP4    | VDR     | SLC39A4   | 0.1641          |
| RASSF1  | GCM1    | MMP1     | 0.1628          | MMP1    | PTGIR   | TRAFD1    | 0.1642          |
| ALPI    | MMP1    | PTGIR    | 0.1628          | MAPK14  | CYP4F3  | PTGIR     | 0.1642          |
| KCTD12  | NOS2    | TSC2     | 0.1629          | DPP4    | REG1A   | SLC28A1   | 0.1642          |
| SLC5A9  | MMP1    | PTGIR    | 0.1629          | BCL2    | CDKN1C  | KCTD12    | 0.1642          |
| DUT     | MMP1    | PTGIR    | 0.1630          | DUT     | SLC9A2  | KCTD12    | 0.1642          |
| PLS3    | GABRB3  | PTGIR    | 0.1630          | SLC27A2 | CYP4F3  | PTGIR     | 0.1642          |
| CCDC80  | DLL1    | PTGIR    | 0.1630          | OTUB1   | FOXJ2   | PTGIR     | 0.1642          |
| ALOX15  | DLL1    | PTGIR    | 0.1631          | KCTD12  | SPDEF   | TFAP2C    | 0.1642          |
| HAS2    | CYP4F3  | PTGIR    | 0.1631          | DPP4    | PTGFRN  | TFAP2C    | 0.1643          |
| KCTD12  | RBL2    | SPI1     | 0.1632          | TGM2    | MMP1    | PTGIR     | 0.1643          |
| SLC9A2  | VDR     | KCTD12   | 0.1632          | LPAR1   | VDR     | KCTD12    | 0.1644          |
| DLL1    | GRB7    | PTGIR    | 0.1632          | DPP4    | MAPK13  | TNFRSF10A | 0.1644          |
| CDKN1C  | KCTD12  | NOS2     | 0.1632          | PLS3    | XIST    | PTGIR     | 0.1644          |
| DPP4    | PCNA    | SLC39A4  | 0.1633          | DPEP1   | NR6A1   | PTGIR     | 0.1644          |
| DPEP1   | KCTD12  | RBL2     | 0.1634          | PTGFRN  | RBP4    | KCTD12    | 0.1645          |
| DPP4    | NPAT    | SLC9A2   | 0.1634          | DPP4    | DEFA5   | SLC39A4   | 0.1645          |
| BST1    | DLL1    | PTGIR    | 0.1634          | FOXJ2   | GCM1    | MMP1      | 0.1645          |
| CDKAL1  | DPP4    | MAPK13   | 0.1635          | KLK6    | CYP4F3  | PTGIR     | 0.1645          |
| SLC39A5 | CYP4F3  | PTGIR    | 0.1635          | DPP4    | VDR     | SLC2A13   | 0.1646          |
| CYP4F3  | DFFA    | PTGIR    | 0.1635          | WNT4    | CYP4F3  | PTGIR     | 0.1646          |
| COX4I1  | SLC39A4 | SLC7A7   | 0.1636          | GJB1    | MMP1    | PTGIR     | 0.1647          |
| PLS3    | PLD3    | PTGIR    | 0.1636          | NPAT    | SLC9A2  | KCTD12    | 0.1647          |
| NPAT    | MMP1    | PTGIR    | 0.1636          | DPP4    | SLC17A5 | SLC39A4   | 0.1647          |
| KCTD12  | MAPK13  | PTPN22   | 0.1636          | GEMIN6  | CYP4F3  | PTGIR     | 0.1647          |
| MMP1    | PTGIR   | SLC25A13 | 0.1637          | DPP4    | MAPK13  | PCNA      | 0.1647          |
| GCM1    | KCTD12  | PTPN22   | 0.1637          | CYP4F3  | GRB7    | PTGIR     | 0.1648          |
| ADAM17  | MMP1    | PTGIR    | 0.1637          | BAK1    | GCM1    | MMP1      | 0.1648          |
| DPP4    | HMGCS1  | SLC39A4  | 0.1638          | CCND1   | MMP1    | PTGIR     | 0.1648          |
| HOXC6   | MMP1    | PTGIR    | 0.1639          | IL36RN  | GCM1    | MMP1      | 0.1649          |
| PLS3    | SLC39A5 | PTGIR    | 0.1639          | CYP4F3  | PTGIR   | TLR2      | 0.1649          |

| Gene 1   | Gene 2  | Gene 3  | bresub<br>error | Gene 1   | Gene 2  | Gene 3    | bresub<br>error |
|----------|---------|---------|-----------------|----------|---------|-----------|-----------------|
| KCTD12   | MAPK13  | SPI1    | 0.1649          | VDR      | KCTD12  | TFAP2C    | 0.1656          |
| SLC5A9   | GCM1    | MMP1    | 0.1649          | DPP4     | PPM1D   | MAPK13    | 0.1656          |
| DPP4     | VDR     | JAK2    | 0.1649          | VDR      | KCTD12  | TSC2      | 0.1657          |
| UHRF1    | MMP1    | PTGIR   | 0.1649          | DPP4     | RELA    | SLC39A4   | 0.1657          |
| HSPD1    | MMP1    | PTGIR   | 0.1649          | MMP1     | PTGIR   | SIGIRR    | 0.1658          |
| CYP4F3   | PTGIR   | ZNF365  | 0.1650          | AQP7     | MMP1    | PTGIR     | 0.1658          |
| PLS3     | PTGIR   | ZNF365  | 0.1650          | BAK1     | IL36RN  | PTGIR     | 0.1658          |
| DPP4     | ELP3    | SLC39A4 | 0.1650          | DPP4     | ELP3    | DEFA5     | 0.1658          |
| FOXA1    | KCTD12  | SLC2A5  | 0.1651          | CYP4F3   | PTGIR   | TNFRSF10D | 0.1658          |
| ALOX15   | CYP4F3  | PTGIR   | 0.1651          | SLC3A1   | DLL1    | PTGIR     | 0.1658          |
| PLS3     | SST     | PTGIR   | 0.1651          | FOXA1    | KCTD12  | LRIG1     | 0.1658          |
| IRF8     | MMP1    | PTGIR   | 0.1651          | PLS3     | GCM1    | MMP1      | 0.1658          |
| DPP4     | LEF1    | REG1A   | 0.1651          | KCTD12   | SLC28A1 | TNFRSF10A | 0.1658          |
| REG1A    | PTPN22  | SPDEF   | 0.1651          | MMP1     | PTGIR   | TLR5      | 0.1658          |
| DUT      | CYP4F3  | PTGIR   | 0.1651          | CEACAM19 | NR6A1   | PTGIR     | 0.1658          |
| KCTD12   | NOS2    | SPDEF   | 0.1651          | GEMIN6   | MMP1    | PTGIR     | 0.1659          |
| PLS3     | EPHB4   | PTGIR   | 0.1651          | GRB7     | MMP1    | PTGIR     | 0.1659          |
| PLS3     | NR6A1   | PTGIR   | 0.1652          | COX4I1   | MEN1    | SLC39A4   | 0.1659          |
| OTUB1    | MEN1    | PTGIR   | 0.1652          | ELP3     | KCTD12  | MAPK13    | 0.1659          |
| BTD      | MMP1    | PTGIR   | 0.1652          | MMP1     | PLA2G7  | PTGIR     | 0.1659          |
| CYP4F3   | ODC1    | PTGIR   | 0.1652          | GRB7     | KCTD12  | SPDEF     | 0.1659          |
| MYB      | COX4I1  | SLC39A4 | 0.1653          | ACSL4    | PTGFRN  | KCTD12    | 0.1660          |
| SLC39A5  | DLL1    | PTGIR   | 0.1653          | DOT1L    | MMP1    | PTGIR     | 0.1661          |
| DPP4     | REG1A   | GCM1    | 0.1653          | VDR      | KCTD12  | SLC28A1   | 0.1661          |
| LEF1     | VDR     | KCTD12  | 0.1653          | DPP4     | GPX1    | MAPK13    | 0.1661          |
| CYP4F3   | PTGIR   | WNT5A   | 0.1654          | KCTD12   | OGG1    | TFAP2C    | 0.1661          |
| PLS3     | NR2C2   | PTGIR   | 0.1654          | PTGFRN   | KCTD12  | MMP1      | 0.1662          |
| LPAR1    | NR6A1   | PTGIR   | 0.1654          | DUT      | FOXA1   | KCTD12    | 0.1662          |
| DPP4     | VDR     | TFAP2C  | 0.1654          | DPP4     | SLC9A2  | TFAP2C    | 0.1663          |
| CDKN1C   | KCTD12  | RBL2    | 0.1654          | KCTD12   | MAPK13  | TNFRSF10A | 0.1663          |
| PLS3     | PTGIR   | WNT5A   | 0.1654          | COX4I1   | FOXA1   | SLC39A4   | 0.1663          |
| CEACAM19 | GCM1    | MMP1    | 0.1654          | EPHB6    | DLL1    | PTGIR     | 0.1663          |
| CYP4F3   | FGF18   | ODC1    | 0.1654          | IGF1     | PLS3    | PTGIR     | 0.1663          |
| FGFR1    | CYP4F3  | PTGIR   | 0.1655          | COL3A1   | CYP4F3  | PTGIR     | 0.1663          |
| VDR      | AIFM2   | KCTD12  | 0.1655          | HOXD1    | MMP1    | PTGIR     | 0.1664          |
| DPP4     | SLC39A4 | TNF     | 0.1656          | DPP4     | PTGFRN  | TNFRSF10A | 0.1664          |
| RBP4     | GCM1    | MMP1    | 0.1656          | NRCAM    | SLC39A5 | SLC3A1    | 0.1664          |

| Gene 1  | Gene 2 | Gene 3    | bresub error | Gene 1  | Gene 2  | Gene 3  | bresub error |
|---------|--------|-----------|--------------|---------|---------|---------|--------------|
| LCT     | PTGIR  | TRAFD1    | 0.1665       | KCTD12  | NOS2    | PECAM1  | 0.1670       |
| SLC10A2 | MMP1   | PTGIR     | 0.1665       | GJC1    | COX4I1  | SLC39A4 | 0.1670       |
| TP63    | CYP4F3 | PTGIR     | 0.1665       | DPP4    | VDR     | MAPK13  | 0.1671       |
| BDKRB2  | CYP4F3 | PTGIR     | 0.1666       | OTUB1   | GCM1    | PECAM1  | 0.1671       |
| COX4I1  | FOXO3  | MAPK8     | 0.1666       | MMP1    | NR2C2   | PTGIR   | 0.1671       |
| DPP4    | LPAR1  | VDR       | 0.1666       | DLL1    | GCM1    | KCTD12  | 0.1671       |
| ITGB1   | MMP1   | PTGIR     | 0.1666       | ISL1    | GCM1    | MMP1    | 0.1672       |
| PLS3    | ILKAP  | PTGIR     | 0.1666       | ELP3    | FOXA1   | KCTD12  | 0.1672       |
| DPP4    | MAPK13 | TNFRSF10B | 0.1666       | CYP4F3  | HOXD8   | PTGIR   | 0.1672       |
| MMP1    | PTGIR  | SLC25A28  | 0.1667       | IL36RN  | ITGB2   | PTGIR   | 0.1672       |
| BST1    | GCM1   | MMP1      | 0.1667       | PTGFRN  | SLC39A5 | KCTD12  | 0.1673       |
| ADAM17  | CYP4F3 | PTGIR     | 0.1667       | ACSL4   | FOXA1   | KCTD12  | 0.1673       |
| OTUB1   | EPHB1  | PTGIR     | 0.1667       | FOXJ2   | MMP1    | PLD3    | 0.1673       |
| PTAFR   | MMP1   | PTGIR     | 0.1667       | DPP4    | MAPK13  | TFAP2C  | 0.1673       |
| PLS3    | ESR1   | PTGIR     | 0.1667       | REG1A   | FOXA1   | KCTD12  | 0.1673       |
| GPX1    | KCTD12 | MAPK13    | 0.1668       | CDK2AP1 | MMP1    | PTGIR   | 0.1673       |
| DLL1    | GABRB3 | PTGIR     | 0.1668       | ID3     | MMP1    | PTGIR   | 0.1673       |
| DPP4    | DEFA5  | GCM1      | 0.1668       | FOXK2   | PTGIR   | TRAFD1  | 0.1674       |
| DLL1    | GSTA1  | PTGIR     | 0.1668       | PLS3    | AQP7    | PTGIR   | 0.1674       |
| PCDH7   | KCTD12 | RBL2      | 0.1668       | CYP4F3  | GSTA1   | PTGIR   | 0.1674       |
| PRKACA  | CYP4F3 | PTGIR     | 0.1668       | KCTD12  | MAPK13  | TAT     | 0.1674       |
| BMP4    | GABRB3 | MMP1      | 0.1669       | IGF1R   | MMP1    | PTGIR   | 0.1674       |
| DPP4    | BMI1   | DEFA5     | 0.1669       | PLS3    | RBP4    | PTGIR   | 0.1674       |
| SLC9A2  | DLL1   | PTGIR     | 0.1669       | BCL2    | KCTD12  | NOS2    | 0.1674       |
| PLS3    | GSTA1  | PTGIR     | 0.1669       | PTGFRN  | KCTD12  | SLC28A1 | 0.1674       |
| DUT     | PLS3   | PTGIR     | 0.1669       | AQP11   | DPP4    | ELP3    | 0.1674       |
| OTUB1   | DLL1   | DPYSL3    | 0.1669       | SLFN5   | CYP4F3  | PTGIR   | 0.1675       |
| MMP1    | ODC1   | PTGIR     | 0.1669       | DPP4    | DEFA6   | SLC39A4 | 0.1675       |
| MAPK14  | DLL1   | PTGIR     | 0.1670       | FOXA1   | GRB7    | KCTD12  | 0.1675       |
| MMP1    | PTGIR  | REL       | 0.1670       | FOXA1   | KCTD12  | SPDEF   | 0.1675       |
| MMP1    | PTGIR  | SPDEF     | 0.1670       | BCL2    | CA14    | KCTD12  | 0.1675       |
| OTUB1   | LCT    | PTGIR     | 0.1670       | FPR1    | DLL1    | PTGIR   | 0.1675       |
| DLL1    | PTGIR  | SLC25A28  | 0.1670       |         |         |         |              |
| EPHB6   | PTGFRN | KCTD12    | 0.1670       |         |         |         |              |



**Table S11. Top 500 low-ENL Single-Gene LDA Classifiers.** The top 500 single-gene linear discriminant analysis classifiers and their respective misclassification rate in flaxseed lignan supplement vs placebo treatment in low-ENL excreters.

| Gene    | bresub<br>error | Gene      | bresub<br>error | Gene    | bresub<br>error | Gene    | bresub<br>error |
|---------|-----------------|-----------|-----------------|---------|-----------------|---------|-----------------|
| ANXA3   | 0.2454          | PLA2G4C   | 0.2966          | FOXP2   | 0.3194          | SAT2    | 0.3333          |
| NR6A1   | 0.2498          | CHI3L1    | 0.2968          | PKM     | 0.3201          | TTN     | 0.3334          |
| KCTD12  | 0.2521          | FOXO3     | 0.2975          | RUNX2   | 0.3203          | RAD52   | 0.3335          |
| EPHB1   | 0.2557          | SLC3A1    | 0.2984          | FO XK2  | 0.3204          | REG1B   | 0.3341          |
| PRKCH   | 0.2573          | HES1      | 0.2992          | ZNF365  | 0.3209          | SLC17A5 | 0.3342          |
| GCM1    | 0.2597          | HMGCS1    | 0.3021          | ADAMTS4 | 0.3222          | ID2     | 0.3345          |
| PTGIR   | 0.2626          | IL1R2     | 0.304           | SLC28A1 | 0.3224          | ANXA5   | 0.3347          |
| PROX1   | 0.2662          | SLC5A8    | 0.3041          | SORD    | 0.3225          | TIMP3   | 0.3347          |
| DLL1    | 0.2681          | PCNA      | 0.3044          | TRAFD1  | 0.3231          | SHH     | 0.3352          |
| PAX6    | 0.2687          | IL18      | 0.3079          | SLC35A2 | 0.3232          | SOX4    | 0.3353          |
| PARD3   | 0.2719          | CDCP1     | 0.3086          | HSD17B2 | 0.3234          | CAT     | 0.3355          |
| F11R    | 0.2732          | SLC20A1   | 0.3093          | PDE6D   | 0.324           | BMI1    | 0.3357          |
| PPAP2C  | 0.2732          | PRKAR1A   | 0.3097          | WNT5A   | 0.3244          | REL     | 0.3359          |
| ELP3    | 0.2801          | HDAC1     | 0.3115          | HOXD8   | 0.3247          | GCLC    | 0.3375          |
| NIFK    | 0.2802          | TNFRSF10A | 0.3116          | TNF     | 0.3257          | DDX5    | 0.339           |
| RHOB    | 0.2808          | TFAP2A    | 0.3117          | HOXB8   | 0.3262          | CCDC80  | 0.3394          |
| SLC50A1 | 0.2815          | BCL2      | 0.3121          | FGFBP1  | 0.3262          | ALDH1A1 | 0.3398          |
| NOS2    | 0.2828          | MSI2      | 0.3122          | SLC7A6  | 0.3266          | DAPK3   | 0.3401          |
| PTGFRN  | 0.2852          | CTDSPL    | 0.3126          | SREBF2  | 0.3266          | FAS     | 0.3403          |
| CD44    | 0.2869          | TFRC      | 0.3126          | VDR     | 0.3271          | SLC40A1 | 0.3403          |
| DFFA    | 0.2869          | TDG       | 0.3127          | SPDEF   | 0.3271          | SLC30A5 | 0.3407          |
| EIF6    | 0.2881          | GRB7      | 0.3129          | HMGB1   | 0.3274          | PLIN2   | 0.3411          |
| SLC6A14 | 0.2888          | HRH1      | 0.3131          | HIST3H3 | 0.3284          | PTPN11  | 0.3414          |
| MAPK8   | 0.2889          | TNK2      | 0.3133          | ILF3    | 0.3284          | PRSS23  | 0.3415          |
| PTGES   | 0.2909          | ACAT1     | 0.3135          | SLCO2A1 | 0.3286          | HOXA10  | 0.3429          |
| CHAC1   | 0.2919          | SLC39A4   | 0.3135          | MMP1    | 0.3287          | PLCD1   | 0.3436          |
| DPP4    | 0.292           | CDK15     | 0.3155          | BECN1   | 0.329           | PPAP2B  | 0.344           |
| SLC9A2  | 0.2935          | CYB5R1    | 0.3159          | PLS3    | 0.3292          | FDFT1   | 0.3446          |
| BMP4    | 0.294           | CDCA7     | 0.3173          | ABCC1   | 0.3308          | KEAP1   | 0.3447          |
| REG1A   | 0.2946          | KLF4      | 0.3177          | MUC4    | 0.3312          | ADAM9   | 0.3448          |
| LEF1    | 0.2959          | CD36      | 0.3184          | SLC4A4  | 0.3315          | CASP3   | 0.3448          |
| EFNB1   | 0.2963          | TFAP2C    | 0.3184          | BMPR2   | 0.332           | DUOX2   | 0.3449          |
| TJP3    | 0.2963          | GREM1     | 0.3186          | FN1     | 0.3325          | HMOX1   | 0.345           |
| COX4I1  | 0.2964          | MPC2      | 0.3186          | PTCH1   | 0.3332          | LCT     | 0.3463          |

| Gene     | bresub<br>error | Gene    | bresub<br>error | Gene      | bresub<br>error | Gene     | bresub<br>error |
|----------|-----------------|---------|-----------------|-----------|-----------------|----------|-----------------|
| BIRC5    | 0.3468          | DEFA5   | 0.3599          | PRKCI     | 0.3729          | SLC30A7  | 0.3872          |
| SLC7A7   | 0.347           | CA5B    | 0.3603          | SPRY2     | 0.3729          | DHFR     | 0.3873          |
| IL13RA1  | 0.3478          | PRKACB  | 0.3606          | TP53      | 0.3738          | ADRB1    | 0.3876          |
| HIF3A    | 0.3484          | BRD2    | 0.3607          | NTS       | 0.3746          | STK11    | 0.3876          |
| HNRNPA1  | 0.3486          | APOA1   | 0.3611          | KIT       | 0.3762          | MSH2     | 0.3879          |
| PPM1D    | 0.3487          | RASSF1  | 0.3613          | MAML1     | 0.3762          | PROM2    | 0.388           |
| SPPL3    | 0.3489          | LRIG1   | 0.3614          | CFLAR     | 0.3767          | GADD45A  | 0.3887          |
| SLC39A9  | 0.3489          | FAM129A | 0.3616          | SLC2A2    | 0.3768          | NOTCH3   | 0.3887          |
| EPHB4    | 0.3493          | COX5B   | 0.3619          | PPARD     | 0.3772          | EGF      | 0.3896          |
| COL1A1   | 0.3499          | FOXA1   | 0.3638          | BST1      | 0.3775          | CDK7     | 0.3908          |
| IGF2BP1  | 0.3505          | TSC22D3 | 0.3641          | FGFR1     | 0.3775          | EPHB6    | 0.3915          |
| STAT3    | 0.351           | SLC39A7 | 0.3643          | DUSP1     | 0.3794          | SLC16A9  | 0.3918          |
| GSTM3    | 0.3515          | ECM1    | 0.3654          | LATS2     | 0.3802          | SLC51A   | 0.3921          |
| CAMK2D   | 0.3517          | MUC2    | 0.3658          | XRCC6     | 0.3806          | CLDN8    | 0.3924          |
| CYP4F3   | 0.3517          | DPYSL3  | 0.3659          | BCL10     | 0.381           | HOXD10   | 0.3925          |
| NR3C1    | 0.352           | CDK8    | 0.3671          | LIG3      | 0.3816          | TPT1     | 0.3926          |
| CEACAM19 | 0.3529          | ITLN1   | 0.3672          | FGF18     | 0.3819          | ZDHHC20  | 0.3926          |
| PTPN22   | 0.3533          | TAT     | 0.3673          | SLC35D1   | 0.3826          | KLK1     | 0.393           |
| BAK1     | 0.3534          | PDE4C   | 0.3674          | YWHAH     | 0.3829          | AXIN2    | 0.393           |
| PLA2G4D  | 0.3535          | FGFR3   | 0.3675          | KITLG     | 0.3829          | POLG     | 0.3932          |
| CCL15    | 0.3539          | MYB     | 0.368           | GPX1      | 0.3833          | NEUROD1  | 0.3934          |
| ALPI     | 0.3546          | BMP2    | 0.3681          | RUNX3     | 0.3834          | DOT1L    | 0.3937          |
| AGPAT3   | 0.3551          | LYPLA1  | 0.3685          | TJP1      | 0.3835          | FOXJ3    | 0.3937          |
| WNT7A    | 0.3561          | ADAM10  | 0.3686          | HNF4G     | 0.3836          | SLC22A23 | 0.3938          |
| CA7      | 0.3562          | BCL2A1  | 0.3687          | LAMA1     | 0.3838          | ACKR2    | 0.394           |
| DEFA6    | 0.3565          | CHP1    | 0.3689          | IFNAR1    | 0.3846          | TYRO3    | 0.394           |
| AIFM2    | 0.3572          | SLC9A8  | 0.3695          | GADD45B   | 0.3847          | SERPINB2 | 0.3941          |
| DDX11    | 0.3576          | ARRB2   | 0.3698          | GABRB3    | 0.385           | PLA2G10  | 0.3944          |
| HOXB7    | 0.3577          | MAPK7   | 0.3698          | SLFN5     | 0.3852          | FOXA3    | 0.3944          |
| CAV1     | 0.3586          | PLAU    | 0.3699          | PTGS2     | 0.3855          | ABCG2    | 0.3949          |
| ABCG5    | 0.3593          | COLEC12 | 0.3701          | TNFRSF10B | 0.3856          | MMP9     | 0.395           |
| SLC38A2  | 0.3593          | MELK    | 0.3701          | DDR2      | 0.3858          | EPAS1    | 0.3959          |
| VIL1     | 0.3594          | CXCL16  | 0.3703          | FOXJ2     | 0.3864          | FFAR2    | 0.396           |
| CA4      | 0.3595          | SLC35B3 | 0.3709          | BACH1     | 0.3865          | AATF     | 0.3963          |
| OTUB1    | 0.3595          | HLTF    | 0.3711          | IL6ST     | 0.3865          | GEMIN6   | 0.3966          |
| ITGB2    | 0.3597          | PIWIL2  | 0.3723          | HMGB1     | 0.387           | BTD      | 0.3969          |
| SPI1     | 0.3598          | SCD     | 0.3726          | SELL      | 0.3871          | HOXC6    | 0.3969          |

| Gene     | bresub<br>error | Gene     | bresub<br>error | Gene     | bresub<br>error | Gene     | bresub<br>error |
|----------|-----------------|----------|-----------------|----------|-----------------|----------|-----------------|
| BCL2L11  | 0.397           | CD59     | 0.4099          | FASN     | 0.4189          | BMF      | 0.4275          |
| ERBB4    | 0.397           | SLC5A11  | 0.41            | NFIL3    | 0.4193          | MUC3A    | 0.4279          |
| APC      | 0.3972          | HHIP     | 0.4101          | SP1      | 0.4197          | SCP2     | 0.4283          |
| NCAM1    | 0.3974          | P4HB     | 0.4109          | NFKB2    | 0.4199          | CACNA1C  | 0.4284          |
| HDAC2    | 0.3976          | RELA     | 0.4113          | TNFRSF21 | 0.4202          | ATG16L1  | 0.429           |
| TFCP2L1  | 0.398           | REG4     | 0.4115          | TLR4     | 0.4204          | CA13     | 0.4291          |
| PLD3     | 0.3981          | AXIN1    | 0.4118          | JAK1     | 0.4205          | CASP4    | 0.4291          |
| OAT      | 0.3987          | PLAUR    | 0.4122          | ANXA1    | 0.4212          | GCLM     | 0.4293          |
| MAML3    | 0.3988          | CDX2     | 0.4123          | LRRK2    | 0.4213          | FLT1     | 0.4296          |
| GDF15    | 0.3994          | MLLT4    | 0.4125          | MAPK10   | 0.4213          | NOG      | 0.4296          |
| NPAT     | 0.3999          | GJB2     | 0.4126          | SPIB     | 0.4214          | SIRT1    | 0.4298          |
| HOXD13   | 0.4002          | CDK2     | 0.4127          | FABP6    | 0.4215          | TNFRSF1B | 0.431           |
| RBL2     | 0.4006          | CTNNA1   | 0.4129          | YWHAE    | 0.422           | CEACAM7  | 0.4312          |
| PARK7    | 0.4013          | S100A8   | 0.4132          | POLB     | 0.4222          | NUMB     | 0.4315          |
| SST      | 0.4017          | ILKAP    | 0.4133          | WNT3     | 0.4224          | CFTR     | 0.4316          |
| SLC9A3R1 | 0.4017          | TNFSF13B | 0.4133          | ILF2     | 0.4228          | SLC31A1  | 0.4318          |
| TLR2     | 0.4025          | COL6A3   | 0.4135          | SLC37A4  | 0.4228          | SFN      | 0.432           |
| SLC1A1   | 0.4029          | BAD      | 0.4136          | DNAJB6   | 0.423           | YAP1     | 0.432           |
| MEF2C    | 0.4033          | FOXO1    | 0.4147          | ALCAM    | 0.4233          | SLC30A6  | 0.4321          |
| SPP1     | 0.4039          | ODC1     | 0.4148          | LIFR     | 0.4234          | CDKAL1   | 0.4325          |
| SLC35A3  | 0.4048          | LGR4     | 0.4155          | NR2C2    | 0.4237          | SLC16A1  | 0.4334          |
| HPGD     | 0.4048          | NRCAM    | 0.4157          | WNT4     | 0.4238          | PRKCA    | 0.4348          |
| SLC30A4  | 0.4051          | PRKCD    | 0.4157          | MEP1A    | 0.4244          | MAB21L2  | 0.4349          |
| SLC25A33 | 0.4056          | ACSL4    | 0.4159          | SLC16A4  | 0.4248          | LAMP1    | 0.4352          |
| SLC39A5  | 0.4065          | BAX      | 0.4159          | PODXL    | 0.4249          | CA3      | 0.4353          |
| TNFRSF1A | 0.4068          | APEX1    | 0.4164          | NRIP1    | 0.425           | MAPK13   | 0.4355          |
| TPM3     | 0.4072          | HAS3     | 0.4164          | YWHAZ    | 0.4256          | ATG5     | 0.4358          |
| SLC38A1  | 0.4074          | DCN      | 0.4166          | ACADS    | 0.4257          | CD9      | 0.4359          |
| PECAM1   | 0.4077          | POU2F3   | 0.4167          | SLC23A3  | 0.4257          | GSN      | 0.436           |
| PYGO2    | 0.4079          | BBC3     | 0.4169          | MSH3     | 0.4258          | MYO9B    | 0.4366          |
| REG3A    | 0.408           | SLC7A9   | 0.4169          | SOD1     | 0.4258          | VIM      | 0.4368          |
| MGAT3    | 0.4082          | NOTCH4   | 0.4175          | FTH1     | 0.426           | CA14     | 0.4368          |
| MALL     | 0.4084          | AQP11    | 0.4178          | CDH5     | 0.4261          | RELB     | 0.4374          |
| GJC1     | 0.4086          | HMGCS2   | 0.4178          | PRKDC    | 0.4263          | LGALS3   | 0.4377          |
| ANGPTL4  | 0.4089          | PDK1     | 0.4181          | WNT2B    | 0.4264          | THRA     | 0.4385          |
| RBP4     | 0.4091          | C11orf30 | 0.4186          | SLC3A2   | 0.4269          | ATF4     | 0.4401          |
| MPC1     | 0.4091          | IL22RA1  | 0.4188          | MAP2K2   | 0.4271          | APOB     | 0.441           |

| Gene    | bresub<br>error | Gene     | bresub<br>error | Gene     | bresub<br>error | Gene    | bresub<br>error |
|---------|-----------------|----------|-----------------|----------|-----------------|---------|-----------------|
| PLAA    | 0.441           | RPS4X    | 0.4452          | FOXP1    | 0.4494          | AMPD3   | 0.4542          |
| PLA2G7  | 0.4416          | SLC25A20 | 0.4452          | HOXB6    | 0.4499          | HCAR2   | 0.4545          |
| YY1     | 0.4416          | TNFSF10  | 0.4454          | PRKCB    | 0.4502          | JUN     | 0.4545          |
| KDM4C   | 0.4419          | DUT      | 0.4455          | PLCB3    | 0.4507          | SDC1    | 0.4545          |
| NOTCH1  | 0.4424          | SLC34A2  | 0.4457          | IL2RG    | 0.4509          | BCL2L1  | 0.4546          |
| PTK2B   | 0.4427          | SEPTIN4  | 0.4457          | NANOG    | 0.4509          | PCDH7   | 0.4548          |
| SLC28A2 | 0.4429          | TLR3     | 0.4462          | PTPN6    | 0.4513          | SLC4A7  | 0.4549          |
| FZD7    | 0.4431          | MACC1    | 0.4463          | KCNH2    | 0.4514          | TGFA    | 0.4549          |
| RCN3    | 0.4434          | CDK2AP1  | 0.4463          | MEIS1    | 0.4515          | XIST    | 0.455           |
| NEU3    | 0.4438          | SYP      | 0.447           | CCL28    | 0.4517          | TNFAIP3 | 0.455           |
| BCL2L2  | 0.4441          | CA12     | 0.4473          | TSC2     | 0.4517          | EP400   | 0.4553          |
| RBL1    | 0.4442          | CKS2     | 0.4476          | PPARGC1A | 0.4519          | MXI1    | 0.4553          |
| CKAP4   | 0.4442          | SLC25A13 | 0.4478          | HOXB3    | 0.452           | ID3     | 0.4555          |
| YWHAB   | 0.4443          | TLR5     | 0.4482          | SOD2     | 0.4521          | CA1     | 0.4557          |
| LPAR4   | 0.4446          | FOS      | 0.4489          | CXCL2    | 0.4524          | NOS1    | 0.4558          |
| S100A9  | 0.4448          | FLNB     | 0.4491          | ERBB2    | 0.4532          | GNL1    | 0.456           |
| HSPD1   | 0.4449          | SLC5A9   | 0.4492          | HOXD1    | 0.4539          | PTPRD   | 0.4562          |

**Table S12. Top 500 low-ENL Two-Gene LDA Classifiers.** The top 500 two-gene linear discriminant analysis classifiers and their respective misclassification rate in flaxseed lignan supplement vs placebo treatment in low-ENL excreters.

| Gene 1  | Gene 2  | bresub error | Gene 1  | Gene 2  | bresub error |
|---------|---------|--------------|---------|---------|--------------|
| ANGPTL4 | RELA    | 0.1702       | GJC1    | POR     | 0.1982       |
| SEPTIN4 | TSTA3   | 0.1773       | GJB1    | NFKB1   | 0.1983       |
| ISL1    | TSTA3   | 0.1799       | KCNH2   | TSTA3   | 0.1983       |
| ANGPTL4 | GJB1    | 0.1803       | TIMP3   | TRAFD1  | 0.1991       |
| NFKB1   | TRAFD1  | 0.1824       | SLC5A11 | ANGPTL4 | 0.1992       |
| NFKB1   | TSTA3   | 0.1835       | COL1A2  | PECAM1  | 0.1994       |
| ANGPTL4 | TSTA3   | 0.1861       | ANGPTL4 | TRAFD1  | 0.1994       |
| PECAM1  | TSTA3   | 0.1862       | NOS1    | NFKB1   | 0.1996       |
| BCL2    | ANGPTL4 | 0.1871       | ISL1    | GJB1    | 0.1998       |
| NFKB1   | PROX1   | 0.1906       | ANGPTL4 | SEPTIN4 | 0.1999       |
| SEPTIN4 | TLR2    | 0.1921       | ANGPTL4 | NFKB1   | 0.2000       |
| GJB1    | SEPTIN4 | 0.1925       | PRKACA  | NFKB1   | 0.2000       |
| GJC1    | TSTA3   | 0.1927       | CACNA1C | NFKB1   | 0.2006       |
| ACTA2   | ANGPTL4 | 0.1928       | DOT1L   | NFKB1   | 0.2006       |
| POR     | ANGPTL4 | 0.1929       | BTBD    | ANGPTL4 | 0.2007       |
| COL1A1  | NFKB1   | 0.1930       | RELA    | TLR2    | 0.2007       |
| LEF1    | NFKB1   | 0.1933       | NOTCH3  | TSTA3   | 0.2008       |
| POR     | NFKB1   | 0.1936       | SEPTIN4 | TIMP3   | 0.2008       |
| NFKB1   | TIMP3   | 0.1937       | IL1R1   | CDCP1   | 0.2008       |
| ANGPTL4 | SLC28A1 | 0.1939       | NFKB1   | REG1B   | 0.2010       |
| NFKB1   | SEPTIN4 | 0.1939       | BRIX1   | TIMP3   | 0.2011       |
| NFKB1   | RAD52   | 0.1939       | NOD2    | TSTA3   | 0.2013       |
| POR     | PECAM1  | 0.1949       | BMP4    | TSTA3   | 0.2014       |
| PROX1   | TSTA3   | 0.1951       | PECAM1  | SEPTIN4 | 0.2014       |
| FGFR1   | TRAFD1  | 0.1952       | TLR2    | TRAFD1  | 0.2014       |
| POR     | SEPTIN4 | 0.1955       | IL1R1   | NFKB1   | 0.2014       |
| TRAFD1  | TSTA3   | 0.1959       | FGFR1   | TSTA3   | 0.2015       |
| EPHB4   | NFKB1   | 0.1960       | ISL1    | NFKB2   | 0.2016       |
| BCL2    | GJC1    | 0.1963       | ALPI    | SPDEF   | 0.2020       |
| NFKB2   | ANGPTL4 | 0.1965       | ISL1    | SLC5A11 | 0.2020       |
| ITGAM   | TSTA3   | 0.1966       | ISL1    | TRAFD1  | 0.2021       |
| ISL1    | POR     | 0.1970       | NFKB1   | PECAM1  | 0.2023       |
| BMP4    | ANGPTL4 | 0.1971       | ITGAM   | POR     | 0.2024       |
| FGFR1   | PECAM1  | 0.1971       | ANGPTL4 | MAPK7   | 0.2025       |
| ALPI    | IER3    | 0.1973       | BMP4    | NFKB2   | 0.2025       |
| BMP4    | NFKB1   | 0.1980       | GADD45B | COL1A2  | 0.2025       |

| Gene 1  | Gene 2  | bresub error |
|---------|---------|--------------|
| PTGFRN  | ANGPTL4 | 0.2026       |
| PRKACA  | ANGPTL4 | 0.2026       |
| CDCP1   | PTGES   | 0.2027       |
| ANGPTL4 | RAD52   | 0.2027       |
| SST     | ALPI    | 0.2030       |
| HOXA2   | NFKB1   | 0.2030       |
| ANGPTL4 | DPYSL3  | 0.2030       |
| ISL1    | TLR5    | 0.2033       |
| COL1A1  | JAG1    | 0.2034       |
| CACNA1C | SEPTIN4 | 0.2034       |
| PLCB4   | TSTA3   | 0.2035       |
| NOD2    | RELA    | 0.2035       |
| ITGAM   | KCNH2   | 0.2038       |
| HOXB6   | ANGPTL4 | 0.2039       |
| GEMIN6  | TSTA3   | 0.2039       |
| LEF1    | TIMP3   | 0.2039       |
| RASSF1  | IER3    | 0.2039       |
| BRIX1   | NFKB1   | 0.2041       |
| ISL1    | COL1A2  | 0.2041       |
| COL1A2  | TSTA3   | 0.2042       |
| ANGPTL4 | COL1A2  | 0.2043       |
| NFKB1   | SLC1A4  | 0.2043       |
| FOXD2   | KCTD17  | 0.2043       |
| IL4R    | KCTD17  | 0.2043       |
| ABCG5   | JAG1    | 0.2044       |
| JAG1    | PTGES   | 0.2045       |
| ANGPTL4 | TLR5    | 0.2045       |
| NIFK    | TSTA3   | 0.2045       |
| POR     | COL1A2  | 0.2046       |
| CDC25B  | IER3    | 0.2048       |
| TGFB2   | IER3    | 0.2048       |
| SST     | SPDEF   | 0.2051       |
| PROX1   | TLR2    | 0.2053       |
| BMP4    | SLC5A11 | 0.2053       |
| CDCP1   | JAG1    | 0.2053       |
| BMP4    | TLR5    | 0.2054       |
| ITGAM   | SLC5A11 | 0.2055       |
| BMP4    | ISL1    | 0.2055       |

| Gene 1  | Gene 2  | bresub error |
|---------|---------|--------------|
| ANGPTL4 | DCN     | 0.2056       |
| COL1A2  | NFKB1   | 0.2056       |
| NFKB1   | NR2C2   | 0.2058       |
| CDK8    | KCTD17  | 0.2062       |
| ISL1    | SLC5A9  | 0.2064       |
| BMP4    | PECAM1  | 0.2065       |
| GADD45B | CDCP1   | 0.2066       |
| DCN     | KCNH2   | 0.2066       |
| BECN1   | JAG1    | 0.2066       |
| NFKB1   | WNT5A   | 0.2066       |
| NR6A1   | TSTA3   | 0.2067       |
| SLC5A9  | ANGPTL4 | 0.2067       |
| GJC1    | ACTA2   | 0.2068       |
| ALPI    | ULK1    | 0.2070       |
| CHI3L1  | NFKB1   | 0.2072       |
| SEPTIN4 | WNT5A   | 0.2072       |
| ISL1    | PTGFRN  | 0.2072       |
| ISL1    | ANGPTL4 | 0.2074       |
| ALPI    | KCTD17  | 0.2075       |
| JAG1    | LRRK2   | 0.2075       |
| GJB1    | NANOG   | 0.2076       |
| COL1A2  | PROX1   | 0.2077       |
| BMF     | HOXA10  | 0.2077       |
| NEU3    | NFKB1   | 0.2077       |
| POR     | PROX1   | 0.2078       |
| ISL1    | PECAM1  | 0.2079       |
| CASP1   | TSC22D3 | 0.2079       |
| PECAM1  | TLR2    | 0.2079       |
| ANGPTL4 | FN1     | 0.2080       |
| KCTD17  | SPDEF   | 0.2081       |
| ITGAM   | ANGPTL4 | 0.2082       |
| HOXA10  | TTN     | 0.2082       |
| ANGPTL4 | PECAM1  | 0.2083       |
| COL1A1  | TLR2    | 0.2085       |
| COL1A1  | TSTA3   | 0.2085       |
| BRIX1   | TSTA3   | 0.2085       |
| IER3    | IL2RB   | 0.2089       |
| ISL1    | TLR2    | 0.2089       |

| Gene 1  | Gene 2    | bresub error |
|---------|-----------|--------------|
| ANGPTL4 | GRB7      | 0.2089       |
| ITGB2   | IER3      | 0.2089       |
| PTK7    | TSTA3     | 0.2091       |
| COL1A2  | GJB1      | 0.2091       |
| SLC6A6  | HOXA10    | 0.2091       |
| IL1R1   | JAG1      | 0.2091       |
| COL1A2  | TRAFD1    | 0.2093       |
| SLC34A2 | ANGPTL4   | 0.2094       |
| TSTA3   | WNT5A     | 0.2094       |
| ANGPTL4 | MALL      | 0.2095       |
| CACNA1C | ISL1      | 0.2097       |
| SLC5A11 | DCN       | 0.2097       |
| SLC39A5 | ANGPTL4   | 0.2097       |
| TLR2    | TSTA3     | 0.2097       |
| CEACAM3 | TSTA3     | 0.2098       |
| FGFR1   | ANGPTL4   | 0.2098       |
| DDX11   | TSTA3     | 0.2099       |
| BMP4    | TRAFD1    | 0.2099       |
| APC     | ANGPTL4   | 0.2099       |
| NANOG   | TRAFD1    | 0.2100       |
| GJC1    | GJB1      | 0.2100       |
| PTPN2   | JAG1      | 0.2100       |
| CDCP1   | CHI3L1    | 0.2100       |
| MEN1    | TSTA3     | 0.2101       |
| CDK15   | IER3      | 0.2102       |
| HOXA10  | IGFBP3    | 0.2102       |
| NFKB1   | TLR2      | 0.2102       |
| ISL1    | KCNH2     | 0.2103       |
| ALPI    | MYO9B     | 0.2104       |
| WNT4    | TSTA3     | 0.2104       |
| NFKB1   | TNFRSF10A | 0.2104       |
| ISL1    | DPYSL3    | 0.2105       |
| WNT4    | NFKB1     | 0.2105       |
| DDR2    | TSTA3     | 0.2106       |
| SLC39A8 | IER3      | 0.2107       |
| NANOG   | TSTA3     | 0.2107       |
| TLR5    | TSTA3     | 0.2107       |
| GADD45B | CHI3L1    | 0.2108       |

| Gene 1  | Gene 2   | bresub error |
|---------|----------|--------------|
| BMP4    | KCNH2    | 0.2108       |
| TGM2    | ANGPTL4  | 0.2108       |
| PECAM1  | RELA     | 0.2110       |
| SST     | TGFB2    | 0.2110       |
| NANOG   | TLR2     | 0.2111       |
| COL1A2  | TLR3     | 0.2112       |
| PROX1   | SEPTIN4  | 0.2112       |
| GJC1    | KCNH2    | 0.2114       |
| BMP4    | ITGAM    | 0.2117       |
| AQP7    | IER3     | 0.2118       |
| FGFR1   | POR      | 0.2118       |
| HOXA10  | MAML1    | 0.2118       |
| BRIX1   | NANOG    | 0.2119       |
| GJC1    | RELA     | 0.2121       |
| JAG1    | SYP      | 0.2121       |
| DDR2    | NANOG    | 0.2122       |
| ANGPTL4 | NANOG    | 0.2123       |
| NANOG   | SIRT1    | 0.2123       |
| PLA2G10 | NR5A2    | 0.2123       |
| TLR2    | WNT5A    | 0.2123       |
| GJB1    | PECAM1   | 0.2124       |
| GADD45B | JAG1     | 0.2124       |
| ITGAM   | GJB1     | 0.2124       |
| BMP4    | GJC1     | 0.2125       |
| FOXK2   | KCTD17   | 0.2125       |
| CACNA1C | LEF1     | 0.2125       |
| ANGPTL4 | KCNH2    | 0.2126       |
| HOXA10  | SERPINA1 | 0.2126       |
| COL1A1  | LEF1     | 0.2126       |
| ANGPTL4 | TIMP3    | 0.2126       |
| DDR2    | NFKB1    | 0.2126       |
| BMF     | IER3     | 0.2126       |
| HOXA10  | ULK1     | 0.2127       |
| NANOG   | TIMP3    | 0.2128       |
| ANGPTL4 | TLR2     | 0.2128       |
| LEF1    | TLR2     | 0.2129       |
| HOXA10  | SHH      | 0.2129       |
| MEIS1   | TLR2     | 0.2129       |

| Gene 1  | Gene 2  | bresub error |
|---------|---------|--------------|
| TGM2    | TSTA3   | 0.2130       |
| CDK15   | HOXA10  | 0.2130       |
| PLA2G10 | HES1    | 0.2131       |
| ANGPTL4 | MLH1    | 0.2131       |
| SST     | HOXA13  | 0.2131       |
| MSI1    | IER3    | 0.2131       |
| SLC5A11 | TSTA3   | 0.2132       |
| ITGAM   | NFKB2   | 0.2132       |
| BMP4    | BRIX1   | 0.2133       |
| DCN     | TSTA3   | 0.2133       |
| ITGAM   | SEPTIN4 | 0.2133       |
| COL1A1  | PROX1   | 0.2134       |
| HOXA10  | HOXA13  | 0.2134       |
| ANGPTL4 | BRIX1   | 0.2134       |
| HOXA10  | XRCC6   | 0.2134       |
| ALPI    | CHAC1   | 0.2137       |
| BMP4    | NOTCH3  | 0.2137       |
| GADD45B | IL1R1   | 0.2137       |
| GADD45B | MEIS1   | 0.2138       |
| NFKB2   | NANOG   | 0.2138       |
| HES1    | MYO9B   | 0.2139       |
| BRIX1   | TLR2    | 0.2139       |
| MSI1    | KCTD17  | 0.2139       |
| CACNA1C | GADD45B | 0.2140       |
| GJC1    | TRAFD1  | 0.2140       |
| LEF1    | ANGPTL4 | 0.2140       |
| SST     | CDC25B  | 0.2141       |
| GJC1    | NFKB2   | 0.2141       |
| GJC1    | MAPK7   | 0.2141       |
| CA7     | TJP1    | 0.2141       |
| SLC39A8 | HOXA10  | 0.2142       |
| SCP2    | TSC22D3 | 0.2143       |
| DDR2    | TIMP3   | 0.2143       |
| HOXA10  | LCT     | 0.2144       |
| BMP4    | DPYSL3  | 0.2144       |
| JAG1    | P2RX4   | 0.2144       |
| GJC1    | PLCB4   | 0.2144       |
| COL1A1  | GADD45B | 0.2145       |

| Gene 1  | Gene 2   | bresub error |
|---------|----------|--------------|
| PECAM1  | TIMP3    | 0.2146       |
| ITGAM   | NANOG    | 0.2146       |
| NANOG   | REG1B    | 0.2147       |
| ANGPTL4 | PROX1    | 0.2147       |
| ALPI    | SLCO2A1  | 0.2147       |
| PTGFRN  | NANOG    | 0.2148       |
| LATS2   | COL1A2   | 0.2148       |
| CACNA1C | ANGPTL4  | 0.2148       |
| ISL1    | BRIX1    | 0.2148       |
| ISL1    | TIMP3    | 0.2148       |
| IER3    | LCT      | 0.2148       |
| NOS1    | TLR2     | 0.2149       |
| ITGAM   | TRAFD1   | 0.2149       |
| GJC1    | DCN      | 0.2149       |
| PRKCH   | NFKB1    | 0.2150       |
| GADD45B | P2RX4    | 0.2151       |
| BMP4    | DCN      | 0.2151       |
| MYO9B   | TJP1     | 0.2152       |
| ISL1    | NFKB1    | 0.2152       |
| HRAS    | MYO9B    | 0.2152       |
| FGFR1   | COL1A2   | 0.2153       |
| HOXA10  | KCTD17   | 0.2153       |
| PLA2G10 | HOXA10   | 0.2153       |
| POR     | TRAFD1   | 0.2154       |
| ANGPTL4 | CGNL1    | 0.2154       |
| IL4R    | NOS2     | 0.2155       |
| COL1A2  | TLR2     | 0.2155       |
| CA7     | HES1     | 0.2155       |
| HOXD10  | KCTD17   | 0.2155       |
| ALPI    | HOXA10   | 0.2155       |
| AQP7    | HOXA10   | 0.2156       |
| GADD45B | PDZK1IP1 | 0.2156       |
| NFKB2   | TSTA3    | 0.2156       |
| EPHB4   | TSTA3    | 0.2158       |
| ANGPTL4 | SIRT1    | 0.2158       |
| NANOG   | TLR5     | 0.2158       |
| BMP4    | NANOG    | 0.2158       |
| GUCA2B  | HOXA10   | 0.2158       |



| Gene 1  | Gene 2   | bresub error |
|---------|----------|--------------|
| CACNA1C | NANOG    | 0.2159       |
| SLC34A2 | TSTA3    | 0.2159       |
| POR     | KCNH2    | 0.2159       |
| GJC1    | SLC5A9   | 0.2159       |
| TGFB2   | CA7      | 0.2159       |
| MEIS1   | TSTA3    | 0.2160       |
| PLA2G10 | SLC2A13  | 0.2160       |
| ITGAM   | NFKB1    | 0.2161       |
| CA13    | HOXA10   | 0.2161       |
| CD44    | HOXA10   | 0.2161       |
| FAM129A | TSTA3    | 0.2161       |
| GPX2    | HOXA10   | 0.2162       |
| ATF4    | CA7      | 0.2162       |
| MAML1   | SREBF2   | 0.2164       |
| CACNA1C | COL1A1   | 0.2164       |
| MEIS1   | NFKB1    | 0.2164       |
| SIRT1   | TIMP3    | 0.2165       |
| CGNL1   | TSTA3    | 0.2165       |
| HRAS    | ULK1     | 0.2166       |
| DAPK1   | COL1A2   | 0.2167       |
| ALPI    | FOXK2    | 0.2167       |
| CDCP1   | LRRK2    | 0.2168       |
| ITGAM   | NOTCH3   | 0.2168       |
| PTK7    | TLR2     | 0.2168       |
| ILF2    | COL1A2   | 0.2169       |
| CHI3L1  | NANOG    | 0.2169       |
| FN1     | TSTA3    | 0.2170       |
| TGFBR2  | JAG1     | 0.2170       |
| PECAM1  | RAD52    | 0.2170       |
| BMP4    | GJB1     | 0.2171       |
| RAD52   | TLR2     | 0.2171       |
| IER3    | NOTCH1   | 0.2171       |
| HRAS    | IER3     | 0.2172       |
| DPYSL3  | NANOG    | 0.2172       |
| SPDEF   | ULK1     | 0.2172       |
| MAML1   | SPDEF    | 0.2172       |
| CDH3    | HOXA10   | 0.2172       |
| JAG1    | PDZK1IP1 | 0.2173       |

| Gene 1  | Gene 2  | bresub error |
|---------|---------|--------------|
| RELA    | TSTA3   | 0.2173       |
| COL1A1  | TLR3    | 0.2173       |
| ITGAM   | COL1A2  | 0.2174       |
| KCNH2   | NANOG   | 0.2174       |
| HOXA10  | TNK2    | 0.2174       |
| IER3    | PTGIR   | 0.2174       |
| SLC10A2 | ALPI    | 0.2175       |
| IER3    | PLIN3   | 0.2175       |
| CA7     | PRKCI   | 0.2175       |
| ISL1    | ITGAM   | 0.2175       |
| ANXA5   | HOXA10  | 0.2175       |
| FFAR4   | HOXA10  | 0.2175       |
| ANGPTL4 | WNT5A   | 0.2176       |
| CDCP1   | NFKB1   | 0.2176       |
| DDIT4   | TSTA3   | 0.2176       |
| SST     | IL2RB   | 0.2176       |
| TGFB2   | HOXA10  | 0.2176       |
| CACNA1C | DCN     | 0.2176       |
| COL1A1  | LATS2   | 0.2177       |
| ALPI    | MAML1   | 0.2177       |
| GSTA4   | JAG1    | 0.2178       |
| BRIX1   | DCN     | 0.2178       |
| SLC39A8 | SST     | 0.2178       |
| CA1     | CDCP1   | 0.2178       |
| SLC5A11 | NANOG   | 0.2178       |
| ADAM10  | CA7     | 0.2179       |
| ISL1    | RAD52   | 0.2179       |
| CHAC1   | HOXA10  | 0.2179       |
| CACNA1C | COL1A2  | 0.2179       |
| AQP7    | SLCO2A1 | 0.2179       |
| FOXP4   | TSTA3   | 0.2179       |
| LPAR1   | SPDEF   | 0.2180       |
| IER3    | PTPN22  | 0.2180       |
| GADD45B | TGFBR2  | 0.2180       |
| CACNA1C | DDR2    | 0.2181       |
| ISL1    | NANOG   | 0.2181       |
| NANOG   | NR6A1   | 0.2182       |
| ILF2    | TLR2    | 0.2182       |

| Gene 1  | Gene 2  | bresub error |
|---------|---------|--------------|
| POR     | TSTA3   | 0.2182       |
| HRAS    | HOXA10  | 0.2183       |
| MYO9B   | SREBF2  | 0.2183       |
| ADAMTS4 | COL1A2  | 0.2183       |
| ITGAM   | PTGFRN  | 0.2183       |
| GJC1    | SEPTIN4 | 0.2184       |
| COL1A1  | ILF2    | 0.2184       |
| ANGPTL4 | EPHB4   | 0.2184       |
| NFKB2   | KCNH2   | 0.2184       |
| MAML1   | XRCC6   | 0.2184       |
| PLS3    | JAG1    | 0.2184       |
| HOXA13  | PRKCI   | 0.2184       |
| CA7     | CD44    | 0.2185       |
| CA3     | IER3    | 0.2185       |
| MAML1   | SHH     | 0.2185       |
| CHI3L1  | JAG1    | 0.2185       |
| ATF4    | HOXA13  | 0.2185       |
| IL18    | TJP1    | 0.2185       |
| MYC     | ANGPTL4 | 0.2185       |
| ITGAM   | TLR5    | 0.2186       |
| DCN     | TIMP3   | 0.2186       |
| MALL    | TSTA3   | 0.2186       |
| FOXA1   | JAG1    | 0.2187       |
| ANGPTL4 | DDR2    | 0.2187       |
| DPYSL3  | KCNH2   | 0.2188       |
| CASP4   | JAG1    | 0.2188       |
| ADAM10  | MYO9B   | 0.2188       |
| BMF     | FGF5    | 0.2188       |
| CACNA1C | PECAM1  | 0.2188       |
| ANGPTL4 | NOTCH3  | 0.2188       |
| BMF     | PRKCI   | 0.2189       |
| ATF4    | ULK1    | 0.2189       |
| PRNP    | ANGPTL4 | 0.2189       |
| JAG1    | TSC22D3 | 0.2189       |
| IER3    | SPDEF   | 0.2189       |
| GJC1    | SLC5A11 | 0.2189       |
| ABCG5   | COL1A2  | 0.2190       |
| ALPI    | FOXD2   | 0.2191       |

| Gene 1  | Gene 2    | bresub error |
|---------|-----------|--------------|
| IER3    | TNFRSF10D | 0.2191       |
| ITGAM   | SLC5A9    | 0.2191       |
| HOXA13  | SREBF2    | 0.2191       |
| ITGB2   | IL2RB     | 0.2191       |
| CA7     | CXCL2     | 0.2191       |
| SST     | PLIN3     | 0.2192       |
| TGFB2   | IL4R      | 0.2192       |
| CA3     | HOXA10    | 0.2193       |
| NFKB1   | SLC26A6   | 0.2193       |
| GJC1    | PTGFRN    | 0.2193       |
| BMF     | ATF4      | 0.2193       |
| PRKACA  | TSTA3     | 0.2194       |
| HRAS    | SLCO2A1   | 0.2194       |
| PRKCI   | ULK1      | 0.2194       |
| COL1A2  | FN1       | 0.2194       |
| MSI1    | HOXA10    | 0.2194       |
| HOXA13  | XRCC6     | 0.2194       |
| GJC1    | ANGPTL4   | 0.2195       |
| ISL1    | NOTCH3    | 0.2195       |
| NOS1    | TSTA3     | 0.2195       |
| FGFR1   | GJC1      | 0.2196       |
| TGFB2   | SLCO2A1   | 0.2196       |
| HOXA13  | SHH       | 0.2196       |
| SLC10A2 | SPDEF     | 0.2197       |
| FGF5    | ULK1      | 0.2197       |
| MSI1    | SLC2A13   | 0.2197       |
| HAS2    | HOXA10    | 0.2197       |
| HRAS    | SST       | 0.2197       |
| APOB    | JAG1      | 0.2197       |
| CA7     | SREBF2    | 0.2198       |
| IER3    | IL4R      | 0.2198       |
| NFKB2   | COL1A2    | 0.2199       |
| BMF     | XRCC6     | 0.2199       |
| ALPI    | IL4R      | 0.2199       |
| PTGFRN  | HOXA10    | 0.2200       |
| ULK1    | XRCC6     | 0.2200       |
| SHH     | ULK1      | 0.2200       |
| DDX11   | NANOG     | 0.2200       |

| Gene 1  | Gene 2  | bresub error |
|---------|---------|--------------|
| LEF1    | TSTA3   | 0.2200       |
| SIRT1   | TSTA3   | 0.2200       |
| MSI1    | SLCO2A1 | 0.2201       |
| ANGPTL4 | DDX11   | 0.2201       |
| HOXA10  | SMAD3   | 0.2201       |
| NOS1    | ANGPTL4 | 0.2201       |
| SLC9A2  | HOXA10  | 0.2201       |
| POR     | GJB1    | 0.2201       |
| CDK7    | HOXA10  | 0.2202       |
| HRAS    | IL4R    | 0.2202       |
| PLA2G10 | FUT2    | 0.2202       |
| RBP4    | HOXA10  | 0.2202       |
| COL1A1  | SIRT1   | 0.2203       |
| FGF5    | HOXA10  | 0.2203       |
| BMP4    | SIRT1   | 0.2203       |
| COL1A2  | NANOG   | 0.2203       |
| SLC39A5 | HOXA10  | 0.2203       |
| GADD45B | APOB    | 0.2203       |
| KCTD17  | XRCC6   | 0.2203       |
| DAB2IP  | IL23R   | 0.2203       |
| MSI1    | CA7     | 0.2204       |
| TJP1    | ULK1    | 0.2204       |
| TP63    | HOXA10  | 0.2204       |
| HOXA10  | SPDEF   | 0.2204       |

| Gene 1   | Gene 2    | bresub error |
|----------|-----------|--------------|
| ITGAL    | HOXA10    | 0.2204       |
| ACKR2    | COL1A2    | 0.2204       |
| SLC10A2  | IER3      | 0.2204       |
| HRAS     | FO XK2    | 0.2204       |
| CD44     | HOXA13    | 0.2205       |
| HOXA10   | SLC16A4   | 0.2205       |
| NPAT     | HOXA10    | 0.2205       |
| MSI1     | SST       | 0.2205       |
| CACNA1C  | HOXA10    | 0.2206       |
| FUT2     | KCTD17    | 0.2206       |
| PLA2G10  | REST      | 0.2206       |
| HOXA10   | PLIN3     | 0.2206       |
| GJC1     | NANOG     | 0.2206       |
| TGFBR2   | COL1A2    | 0.2206       |
| CD44     | ULK1      | 0.2206       |
| ATF4     | TNK2      | 0.2206       |
| SERPINB2 | JAG1      | 0.2206       |
| TGFB2    | FOXD2     | 0.2207       |
| TNK2     | XRCC6     | 0.2207       |
| CA7      | SMAD3     | 0.2207       |
| SLC2A13  | XRCC6     | 0.2207       |
| CASP1    | CDCP1     | 0.2208       |
| SST      | TNFRSF10D | 0.2208       |
| SREBF2   | ULK1      | 0.2208       |

**Table S13. Top 500 low-ENL Three-Gene LDA Classifiers.** The top 500 three-gene linear discriminant analysis classifiers and their respective misclassification rate in flaxseed lignan supplement vs placebo treatment in low-ENL excretors.

| Gene 1  | Gene 2  | Gene 3  | bresub<br>error | Gene 1  | Gene 2    | Gene 3  | bresub<br>error |
|---------|---------|---------|-----------------|---------|-----------|---------|-----------------|
| CDH3    | SEPTIN4 | TSTA3   | 0.1427          | FN1     | RELA      | TSTA3   | 0.1609          |
| PLA2G10 | HOXA13  | ULK1    | 0.1429          | PLA2G10 | FFAR4     | MAML1   | 0.1612          |
| PLA2G10 | HOXA13  | MAML1   | 0.1429          | RBP4    | SEPTIN4   | TSTA3   | 0.1612          |
| FAM129A | SEPTIN4 | TSTA3   | 0.1450          | ANGPTL4 | SEPTIN4   | TSTA3   | 0.1613          |
| CACNB4  | RELA    | TSTA3   | 0.1465          | DCN     | RELA      | TSTA3   | 0.1614          |
| NANOG   | RELA    | TSTA3   | 0.1468          | PLA2G10 | HOXA13    | REST    | 0.1614          |
| CYP4F3  | HOXA13  | KCTD17  | 0.1523          | POR     | SEPTIN4   | TSTA3   | 0.1615          |
| POR     | NFKB1   | TRAFD1  | 0.1537          | NOD2    | ANGPTL4   | RELA    | 0.1615          |
| RELA    | SEPTIN4 | TSTA3   | 0.1537          | POR     | GJB1      | SEPTIN4 | 0.1616          |
| WNT4    | RELA    | TSTA3   | 0.1540          | FAM129A | COL1A2    | TLR3    | 0.1619          |
| GPX2    | PLA2G10 | MAML1   | 0.1542          | DEFA6   | HOXA13    | KCTD17  | 0.1619          |
| PLA2G10 | FOXD2   | MAML1   | 0.1547          | BMP4    | ANGPTL4   | RELA    | 0.1620          |
| NFKB1   | TRAFD1  | TSTA3   | 0.1551          | SLC5A1  | SEPTIN4   | TSTA3   | 0.1620          |
| CDK8    | PLA2G10 | MAML1   | 0.1557          | PLA2G10 | PRKCE     | ULK1    | 0.1620          |
| FOXP4   | SEPTIN4 | TSTA3   | 0.1565          | KDM4B   | PLA2G10   | MAML1   | 0.1621          |
| PPAP2B  | SEPTIN4 | TSTA3   | 0.1570          | CCND1   | SEPTIN4   | TSTA3   | 0.1624          |
| NFKB2   | SEPTIN4 | TSTA3   | 0.1576          | SEPTIN4 | TNFRSF10A | TSTA3   | 0.1625          |
| PLA2G10 | HOXA13  | NR5A2   | 0.1577          | MSI1    | PLA2G10   | MAML1   | 0.1627          |
| ANGPTL4 | RELA    | TSTA3   | 0.1580          | ISL1    | PECAM1    | TSTA3   | 0.1627          |
| RELA    | TRAFD1  | TSTA3   | 0.1581          | FGFR1   | TRAFD1    | TSTA3   | 0.1627          |
| PECAM1  | SEPTIN4 | TSTA3   | 0.1581          | RELA    | SLC16A4   | TSTA3   | 0.1628          |
| SEPTIN4 | TRAFD1  | TSTA3   | 0.1583          | FOXP4   | ANGPTL4   | RELA    | 0.1631          |
| PLA2G10 | FOXD2   | HOXA13  | 0.1584          | PLA2G10 | FO XK2    | ULK1    | 0.1631          |
| PLA2G10 | CYP4F3  | HOXA13  | 0.1587          | PLA2G10 | FOXD2     | ULK1    | 0.1632          |
| RELA    | SLC1A4  | TSTA3   | 0.1588          | COL1A2  | DDIT4     | RPSA    | 0.1632          |
| PLA2G10 | MAML1   | PRKCE   | 0.1590          | APC     | SEPTIN4   | TSTA3   | 0.1632          |
| PLA2G10 | HOXA13  | SLCO2A1 | 0.1591          | IGF2BP1 | RELA      | TSTA3   | 0.1634          |
| PTK7    | RELA    | TSTA3   | 0.1595          | COL1A2  | NFKB1     | TLR3    | 0.1635          |
| PLA2G10 | CHAC1   | HOXA13  | 0.1596          | CDK8    | PLA2G10   | ULK1    | 0.1641          |
| PLA2G10 | FO XK2  | MAML1   | 0.1596          | ANGPTL4 | KIT       | RELA    | 0.1641          |
| SLC34A2 | SEPTIN4 | TSTA3   | 0.1598          | HOXA9   | NFKB1     | TSTA3   | 0.1643          |
| ANGPTL4 | IGF2BP1 | RELA    | 0.1600          | SLC34A2 | RELA      | TSTA3   | 0.1643          |
| CACNA1C | DDIT4   | RPSA    | 0.1600          | SLC39A5 | SEPTIN4   | TSTA3   | 0.1644          |
| PLA2G10 | MAML1   | NR5A2   | 0.1600          | MSI1    | HOXA13    | KCTD17  | 0.1645          |
| PLA2G10 | HOXA13  | PRKCE   | 0.1602          | PPM1D   | SEPTIN4   | TSTA3   | 0.1645          |
| CDK8    | PLA2G10 | HOXA13  | 0.1602          | CACNA1C | NFKB1     | TRAFD1  | 0.1646          |
| GEMIN6  | TRAFD1  | TSTA3   | 0.1608          | ANGPTL4 | EPHB4     | RELA    | 0.1648          |
| PLA2G10 | FO XK2  | HOXA13  | 0.1609          | CGNL1   | RELA      | TSTA3   | 0.1648          |

| Gene 1  | Gene 2  | Gene 3  | bresub<br>error | Gene 1  | Gene 2  | Gene 3  | bresub<br>error |
|---------|---------|---------|-----------------|---------|---------|---------|-----------------|
| WNT4    | ANGPTL4 | RELA    | 0.1648          | HOXD13  | SEPTIN4 | TSTA3   | 0.1673          |
| HOXA9   | NFKB1   | TRAFD1  | 0.1649          | EPHB4   | NFKB1   | TRAFD1  | 0.1673          |
| PLA2G10 | FOXO3   | HOXA13  | 0.1650          | IGF2BP1 | SEPTIN4 | TSTA3   | 0.1673          |
| GPX2    | PLA2G10 | ULK1    | 0.1651          | LPAR4   | PECAM1  | TSTA3   | 0.1674          |
| KDM4B   | PLA2G10 | HOXA13  | 0.1651          | KDM4B   | PLA2G10 | SLC2A13 | 0.1674          |
| FOXK2   | HOXA13  | KCTD17  | 0.1653          | FOXP4   | RELA    | TSTA3   | 0.1674          |
| HOXA13  | NFKB1   | TSTA3   | 0.1653          | NANOG   | TRAFD1  | TSTA3   | 0.1675          |
| FOXO3   | HOXA13  | KCTD17  | 0.1654          | PRKCH   | SEPTIN4 | TSTA3   | 0.1675          |
| LEF1    | NFKB1   | TRAFD1  | 0.1657          | ISL1    | TRAFD1  | TSTA3   | 0.1677          |
| FAM129A | PROX1   | TLR3    | 0.1657          | MSI1    | PLA2G10 | HOXA13  | 0.1677          |
| PLA2G10 | PRKCE   | SLC2A13 | 0.1657          | MSH3    | PECAM1  | TSTA3   | 0.1677          |
| SEPTIN4 | TSC2    | TSTA3   | 0.1657          | FGFR1   | POR     | TRAFD1  | 0.1679          |
| CDK7    | SEPTIN4 | TSTA3   | 0.1657          | DDIT4   | REL     | RPSA    | 0.1679          |
| POR     | ANGPTL4 | SEPTIN4 | 0.1658          | CDH3    | ISL1    | TSTA3   | 0.1679          |
| DDIT4   | RPSA    | TIMP3   | 0.1659          | ANGPTL4 | PECAM1  | TSTA3   | 0.1680          |
| PRKACA  | RELA    | TSTA3   | 0.1659          | ISL1    | ANGPTL4 | TSTA3   | 0.1680          |
| PLA2G10 | HOXA13  | HOXA9   | 0.1659          | SEPTIN4 | TSTA3   | WNT5A   | 0.1682          |
| ISL1    | RELA    | TSTA3   | 0.1661          | PLA2G10 | MAML1   | PIK3CA  | 0.1683          |
| NFKB2   | RELA    | TSTA3   | 0.1662          | CDH3    | PECAM1  | TSTA3   | 0.1683          |
| POR     | GJB1    | PECAM1  | 0.1662          | POR     | ANGPTL4 | PECAM1  | 0.1684          |
| SST     | PTPN22  | SPDEF   | 0.1662          | PLA2G10 | HOXA10  | MAML1   | 0.1684          |
| POR     | PECAM1  | SEPTIN4 | 0.1663          | PLCB4   | SEPTIN4 | TSTA3   | 0.1684          |
| ACTG2   | SEPTIN4 | TSTA3   | 0.1663          | PLA2G10 | HOXA13  | TNK2    | 0.1684          |
| PRKCH   | NFKB1   | TRAFD1  | 0.1663          | FAM129A | TRAFD1  | TSTA3   | 0.1685          |
| ITGAL   | SEPTIN4 | TSTA3   | 0.1664          | DDIT4   | RPSA    | TLR2    | 0.1685          |
| NOS1    | TRAFD1  | TSTA3   | 0.1664          | NR2C2   | PECAM1  | TSTA3   | 0.1685          |
| FAM129A | DDIT4   | TSTA3   | 0.1664          | ALPI    | IER3    | SPDEF   | 0.1685          |
| KDM4B   | PLA2G10 | ULK1    | 0.1664          | GPX2    | PLA2G10 | SLC2A13 | 0.1686          |
| PTK7    | SEPTIN4 | TSTA3   | 0.1665          | COL1A2  | NFKB1   | TSTA3   | 0.1686          |
| SEPTIN4 | TFAP2C  | TSTA3   | 0.1666          | FGFR1   | NANOG   | TSTA3   | 0.1687          |
| NOD2    | GJB1    | RELA    | 0.1667          | CDH3    | TRAFD1  | TSTA3   | 0.1688          |
| DOT1L   | RELA    | TSTA3   | 0.1668          | HMGCL   | SEPTIN4 | TSTA3   | 0.1689          |
| LPAR4   | SEPTIN4 | TSTA3   | 0.1668          | ACTA2   | ANGPTL4 | RELA    | 0.1690          |
| LEF1    | NFKB1   | TSTA3   | 0.1668          | NFKB1   | RAD52   | TRAFD1  | 0.1690          |
| FOXP4   | ISL1    | TSTA3   | 0.1669          | SST     | ALPI    | SPDEF   | 0.1691          |
| VNN1    | HOXA13  | KCTD17  | 0.1669          | BMP4    | NOD2    | RELA    | 0.1691          |
| NOS1    | RELA    | TSTA3   | 0.1670          | FGFR1   | POR     | PECAM1  | 0.1691          |
| MSI1    | PLA2G10 | ULK1    | 0.1670          | RELA    | TSTA3   | WNT5A   | 0.1691          |
| NOD2    | RELA    | WNT5A   | 0.1671          | NFKB1   | TLR2    | TRAFD1  | 0.1691          |
| BRIX1   | RELA    | TSTA3   | 0.1671          | DDIT4   | TRAFD1  | TSTA3   | 0.1692          |
| APC     | PROX1   | TSTA3   | 0.1672          | FAM129A | PROX1   | TSTA3   | 0.1693          |

| Gene 1  | Gene 2  | Gene 3  | bresub<br>error | Gene 1  | Gene 2  | Gene 3  | bresub<br>error |
|---------|---------|---------|-----------------|---------|---------|---------|-----------------|
| HOXD13  | ANGPTL4 | RELA    | 0.1694          | HOXB8   | PECAM1  | TSTA3   | 0.1714          |
| IL1R2   | SEPTIN4 | TSTA3   | 0.1695          | CDK8    | PLA2G10 | REST    | 0.1714          |
| TREH    | ANGPTL4 | RELA    | 0.1695          | PLA2G10 | FFAR4   | ULK1    | 0.1714          |
| ISL1    | WNT4    | TSTA3   | 0.1695          | APC     | SLC6A20 | TSTA3   | 0.1714          |
| FAM129A | GEMIN6  | TSTA3   | 0.1696          | TP63    | NFKB1   | TSTA3   | 0.1714          |
| APC     | FGFR1   | TSTA3   | 0.1696          | ANGPTL4 | MAPK7   | RELA    | 0.1715          |
| GPX2    | PLA2G10 | HOXA13  | 0.1697          | PECAM1  | TSTA3   | WNT5A   | 0.1715          |
| ANGPTL4 | CACNB4  | RELA    | 0.1697          | POR     | SEPTIN4 | TRAFD1  | 0.1715          |
| PDE4C   | SEPTIN4 | TSTA3   | 0.1698          | PLA2G10 | FFAR4   | HOXA13  | 0.1715          |
| APC     | PPAP2B  | TSTA3   | 0.1698          | NOD2    | SEPTIN4 | TSTA3   | 0.1715          |
| LEF1    | DDIT4   | RPSA    | 0.1698          | POR     | NFKB1   | OGG1    | 0.1715          |
| NFKB2   | ANGPTL4 | RELA    | 0.1699          | FAM129A | WNT4    | TSTA3   | 0.1716          |
| NFKB1   | TIMP3   | TRAFD1  | 0.1699          | WNT4    | SEPTIN4 | TSTA3   | 0.1716          |
| FAM129A | TLR3    | TSTA3   | 0.1700          | COL1A2  | CTDSPL  | NFKB1   | 0.1716          |
| PLA2G10 | PRKCE   | REST    | 0.1700          | NFKB1   | PROX1   | TSTA3   | 0.1716          |
| APC     | NFKB1   | TSTA3   | 0.1701          | PTAFR   | RELA    | TSTA3   | 0.1717          |
| SEPTIN4 | TSTA3   | ZBTB33  | 0.1701          | NFKB1   | PPAP2B  | TSTA3   | 0.1717          |
| GJB1    | SEPTIN4 | TFAP2C  | 0.1701          | SLC10A2 | SST     | SPDEF   | 0.1718          |
| PLA2G10 | MYO9B   | ULK1    | 0.1701          | ISL1    | POR     | PECAM1  | 0.1718          |
| NFKB1   | RELA    | TSTA3   | 0.1701          | ANGPTL4 | MLH1    | RELA    | 0.1719          |
| ITGB2   | SST     | SPDEF   | 0.1702          | PTAFR   | SEPTIN4 | TSTA3   | 0.1719          |
| BRX1    | NFKB1   | TSTA3   | 0.1703          | ANGPTL4 | RELA    | WNT5A   | 0.1720          |
| PECAM1  | RELA    | TSTA3   | 0.1703          | APC     | PTK7    | TSTA3   | 0.1720          |
| BCL2    | ANGPTL4 | RELA    | 0.1703          | NFKB1   | NR2C2   | TSTA3   | 0.1720          |
| HOXA13  | KCTD17  | NOS2    | 0.1704          | ANGPTL4 | TRAFD1  | TSTA3   | 0.1720          |
| LEF1    | RELA    | TSTA3   | 0.1704          | PLA2G10 | FOXD2   | REST    | 0.1720          |
| ALPI    | HOXA13  | SPDEF   | 0.1704          | CDK8    | PLA2G10 | SLC2A13 | 0.1721          |
| NOS1    | NFKB1   | TRAFD1  | 0.1705          | POR     | NFKB1   | TSTA3   | 0.1721          |
| LPAR4   | NFKB1   | TSTA3   | 0.1705          | NFKB1   | REL     | TRAFD1  | 0.1721          |
| FAM129A | FGFR1   | TSTA3   | 0.1705          | ISL1    | SEPTIN4 | TSTA3   | 0.1721          |
| GEMIN6  | NFKB1   | TSTA3   | 0.1706          | ITGB2   | IER3    | SPDEF   | 0.1721          |
| APC     | ISL1    | TSTA3   | 0.1706          | ISL1    | POR     | ANGPTL4 | 0.1721          |
| GJB1    | SEPTIN4 | TSTA3   | 0.1708          | NOS1    | NFKB1   | TSTA3   | 0.1721          |
| FAM129A | LEF1    | TSTA3   | 0.1709          | PLA2G10 | MAML1   | TP53    | 0.1721          |
| ANGPTL4 | MSH3    | RELA    | 0.1709          | NR2C2   | RELA    | TSTA3   | 0.1722          |
| ITGB2   | IER3    | NR5A2   | 0.1709          | FAM129A | PTK7    | TSTA3   | 0.1723          |
| POLB    | SEPTIN4 | TSTA3   | 0.1710          | PTAFR   | ANGPTL4 | RELA    | 0.1723          |
| NFKB1   | OGG1    | TSTA3   | 0.1710          | FOXP4   | POR     | SEPTIN4 | 0.1723          |
| PLA2G10 | PIK3CA  | ULK1    | 0.1710          | ANGPTL4 | RELA    | TLR5    | 0.1723          |
| FAM129A | POR     | SEPTIN4 | 0.1711          | HOXA13  | IL4R    | KCTD17  | 0.1724          |
| PROX1   | SEPTIN4 | TSTA3   | 0.1712          | GEMIN6  | PTK7    | TSTA3   | 0.1724          |

| Gene 1   | Gene 2  | Gene 3  | bresub<br>error | Gene 1   | Gene 2    | Gene 3  | bresub<br>error |
|----------|---------|---------|-----------------|----------|-----------|---------|-----------------|
| GRB7     | NFKB1   | TSTA3   | 0.1724          | NFKB2    | PECAM1    | TSTA3   | 0.1737          |
| PLA2G10  | JAK2    | MAML1   | 0.1724          | NFKB1    | SLC1A4    | TSTA3   | 0.1737          |
| ISL1     | NR2C2   | TSTA3   | 0.1725          | PLA2G10  | HOXA10    | HOXA13  | 0.1738          |
| POR      | NR2C2   | PECAM1  | 0.1725          | PLA2G10  | JAK2      | ULK1    | 0.1738          |
| SLC1A4   | TRAFD1  | TSTA3   | 0.1726          | ITGAM    | SEPTIN4   | TSTA3   | 0.1738          |
| NANOG    | RELA    | TLR2    | 0.1726          | C11orf30 | SEPTIN4   | TSTA3   | 0.1738          |
| NOS1     | SEPTIN4 | TSTA3   | 0.1726          | FGFR1    | PECAM1    | TSTA3   | 0.1738          |
| APC      | ANGPTL4 | TSTA3   | 0.1726          | PLA2G10  | JAK2      | SLC2A13 | 0.1738          |
| PECAM1   | TLR5    | TSTA3   | 0.1727          | ISL1     | POR       | GJB1    | 0.1738          |
| POR      | CTDSPL  | SEPTIN4 | 0.1727          | FOXP4    | PECAM1    | TSTA3   | 0.1738          |
| RELA     | TLR2    | TRAFD1  | 0.1728          | ISL1     | NOD2      | TSTA3   | 0.1738          |
| KDM4B    | PLA2G10 | REST    | 0.1728          | SLC27A2  | SEPTIN4   | TSTA3   | 0.1738          |
| PLA2G10  | NR5A2   | ULK1    | 0.1728          | APC      | TRAFD1    | TSTA3   | 0.1738          |
| CACNA2D1 | TRAFD1  | TSTA3   | 0.1729          | FAM129A  | NR2C2     | TSTA3   | 0.1739          |
| NFKB1    | PTK7    | TSTA3   | 0.1729          | ISL1     | PLCB4     | TSTA3   | 0.1739          |
| DDIT4    | RPSA    | TSTA3   | 0.1729          | BST1     | ANGPTL4   | RELA    | 0.1740          |
| FOXD2    | HOXA13  | KCTD17  | 0.1730          | SLC31A1  | NFKB1     | TRAFD1  | 0.1740          |
| ANGPTL4  | DCN     | RELA    | 0.1730          | SEPTIN4  | TLR2      | TSTA3   | 0.1740          |
| POR      | WNT4    | GJB1    | 0.1730          | FOXP4    | WNT4      | TSTA3   | 0.1741          |
| ISL1     | NFKB2   | TSTA3   | 0.1730          | ISL1     | MALL      | TSTA3   | 0.1741          |
| ANGPTL4  | PECAM1  | RELA    | 0.1730          | FGFR1    | POR       | WNT4    | 0.1742          |
| PLA2G10  | MAML1   | POU2F3  | 0.1731          | ANGPTL4  | FN1       | RELA    | 0.1742          |
| TGFB2    | ALPI    | SPDEF   | 0.1731          | GEMIN6   | SLC34A2   | TSTA3   | 0.1742          |
| BRIX1    | NFKB1   | TRAFD1  | 0.1731          | COL1A2   | RPSA      | TLR3    | 0.1742          |
| BRIX1    | TRAFD1  | TSTA3   | 0.1732          | BTD      | NFKB1     | TSTA3   | 0.1742          |
| HOXC6    | ANGPTL4 | RELA    | 0.1733          | PLA2G10  | BCL2L13   | MAML1   | 0.1743          |
| POR      | CTDSPL  | DDIT4   | 0.1733          | COL1A2   | NFKB1     | TRAFD1  | 0.1743          |
| PRKACA   | NFKB1   | TSTA3   | 0.1733          | PTGFRN   | NFKB1     | TSTA3   | 0.1743          |
| GJC1     | ANGPTL4 | RELA    | 0.1733          | FAM129A  | CDH5      | TSTA3   | 0.1743          |
| SAT2     | PECAM1  | TSTA3   | 0.1734          | SLC31A1  | SEPTIN4   | TSTA3   | 0.1743          |
| MALL     | PECAM1  | TSTA3   | 0.1734          | HOXB8    | PLCB4     | TSTA3   | 0.1743          |
| PLA2G10  | FOXK2   | REST    | 0.1735          | PLA2G10  | HOXA13    | KCTD17  | 0.1744          |
| GEMIN6   | RELA    | TSTA3   | 0.1735          | POLB     | NFKB1     | TSTA3   | 0.1744          |
| KCNH2    | PECAM1  | TSTA3   | 0.1735          | ACSL4    | SEPTIN4   | TSTA3   | 0.1744          |
| CACNA1C  | CTDSPL  | NFKB1   | 0.1735          | GJB1     | TNFRSF10A | SEPTIN4 | 0.1744          |
| SLC6A20  | TRAFD1  | TSTA3   | 0.1736          | WNT4     | GJB1      | RELA    | 0.1744          |
| POR      | COL1A2  | NFKB1   | 0.1736          | FGFR1    | WNT4      | TSTA3   | 0.1744          |
| NFKB1    | SLC16A4 | TSTA3   | 0.1736          | IER3     | PTPN22    | SPDEF   | 0.1744          |
| LPAR1    | CDC25B  | SPDEF   | 0.1736          | CACNA2D1 | RELA      | TSTA3   | 0.1744          |
| FGFR1    | RELA    | TSTA3   | 0.1736          | FAM129A  | SLC1A4    | TSTA3   | 0.1744          |
| PLA2G10  | CHAC1   | PRKCE   | 0.1737          | TGFB2    | HOXA13    | KCTD17  | 0.1745          |

| Gene 1  | Gene 2  | Gene 3  | bresub<br>error | Gene 1  | Gene 2    | Gene 3  | bresub<br>error |
|---------|---------|---------|-----------------|---------|-----------|---------|-----------------|
| HOXA13  | KCTD17  | MYO9B   | 0.1745          | NANOG   | SEPTIN4   | TSTA3   | 0.1752          |
| POR     | CTDSPL  | NFKB1   | 0.1745          | PLA2G10 | SLC2A13   | SLC7A7  | 0.1752          |
| CSPG5   | ANGPTL4 | RELA    | 0.1746          | FGFR1   | NOS1      | TSTA3   | 0.1753          |
| PLA2G10 | TGFB2   | HOXA13  | 0.1746          | GJC1    | ISL1      | TSTA3   | 0.1753          |
| FAM129A | BRIX1   | TSTA3   | 0.1746          | FAM129A | PRKACA    | TSTA3   | 0.1753          |
| CA5B    | PECAM1  | TSTA3   | 0.1746          | ISL1    | TNFRSF10A | TSTA3   | 0.1754          |
| ITGAM   | ANGPTL4 | RELA    | 0.1746          | POR     | SLC31A1   | SEPTIN4 | 0.1754          |
| FAM129A | TGM2    | TSTA3   | 0.1746          | POR     | HOXA9     | NFKB1   | 0.1754          |
| CCND1   | NFKB1   | TSTA3   | 0.1746          | DCN     | TRAFD1    | TSTA3   | 0.1754          |
| FGFR1   | SEPTIN4 | TSTA3   | 0.1746          | DAB2IP  | NFKB1     | TSTA3   | 0.1754          |
| MYC     | ANGPTL4 | RELA    | 0.1746          | PRKACA  | TRAFD1    | TSTA3   | 0.1754          |
| DOT1L   | NFKB1   | TSTA3   | 0.1746          | SLC10A2 | ALPI      | SPDEF   | 0.1754          |
| POR     | BRIX1   | NFKB1   | 0.1747          | DDR2    | NFKB1     | TSTA3   | 0.1754          |
| GJC1    | NOD2    | RELA    | 0.1747          | GJC1    | POR       | GJB1    | 0.1754          |
| PLA2G10 | HOXA13  | POU2F3  | 0.1747          | GPX2    | PLA2G10   | CHAC1   | 0.1754          |
| FOXP4   | ANGPTL4 | TSTA3   | 0.1747          | ALPI    | HOXA13    | KCTD17  | 0.1754          |
| PLA2G10 | LTBP1   | SLC2A13 | 0.1748          | NFKB1   | TNF       | TRAFD1  | 0.1755          |
| HOXA13  | KCTD17  | MAPK13  | 0.1748          | EPHB4   | RELA      | WNT5A   | 0.1755          |
| COL1A2  | CTDSPL  | DDIT4   | 0.1748          | ISL1    | SAT2      | TSTA3   | 0.1755          |
| ISL1    | TSTA3   | WNT5A   | 0.1748          | FAM129A | RAD52     | TLR3    | 0.1755          |
| SEPTIN4 | TLR5    | TSTA3   | 0.1749          | APC     | SLC1A4    | TSTA3   | 0.1756          |
| SLC34A2 | TRAFD1  | TSTA3   | 0.1749          | CDK8    | HOXA13    | KCTD17  | 0.1756          |
| APC     | DDIT4   | TSTA3   | 0.1749          | LEF1    | POR       | NFKB1   | 0.1756          |
| RELA    | SEPTIN4 | TLR2    | 0.1749          | ISL1    | NANOG     | TSTA3   | 0.1756          |
| PLA2G10 | ALCAM   | FUT2    | 0.1749          | PLA2G10 | FOXD2     | SLC2A13 | 0.1756          |
| PLA2G10 | HOXA13  | MYO9B   | 0.1750          | ISL1    | CACNB4    | TSTA3   | 0.1756          |
| LDHB    | SEPTIN4 | TSTA3   | 0.1750          | SST     | HOXA13    | SPDEF   | 0.1756          |
| CDH3    | ANGPTL4 | TSTA3   | 0.1750          | NFKB1   | PROX1     | TRAFD1  | 0.1757          |
| SLC2A10 | NFKB1   | TSTA3   | 0.1750          | COL1A2  | NFKB1     | RELA    | 0.1757          |
| GJB1    | IGF2BP1 | RELA    | 0.1750          | FOXP4   | TRAFD1    | TSTA3   | 0.1757          |
| FGFR2   | SEPTIN4 | TSTA3   | 0.1750          | LEF1    | RELA      | TLR2    | 0.1758          |
| PTK7    | RELA    | TLR2    | 0.1751          | XIST    | SEPTIN4   | TSTA3   | 0.1758          |
| POR     | NFKB1   | NR2C2   | 0.1751          | PLA2G10 | HOXA9     | NR5A2   | 0.1758          |
| WNT4    | ANGPTL4 | TSTA3   | 0.1751          | APC     | PDE4C     | TSTA3   | 0.1758          |
| PLA2G10 | FOXK2   | SLC2A13 | 0.1751          | ISL1    | SLC34A2   | TSTA3   | 0.1759          |
| PECAM1  | PPAP2B  | TSTA3   | 0.1751          | NFKB1   | TLR3      | TSTA3   | 0.1759          |
| WNT4    | RELA    | WNT5A   | 0.1751          | SEPTIN4 | TLR3      | TSTA3   | 0.1759          |
| GEMIN6  | SEPTIN4 | TSTA3   | 0.1752          | SST     | CDC25B    | SPDEF   | 0.1759          |
| POR     | SLC5A1  | SEPTIN4 | 0.1752          | DCN     | SEPTIN4   | TSTA3   | 0.1759          |
| CTDSPL  | DDIT4   | TLR2    | 0.1752          | POR     | NFKB1     | RAD52   | 0.1759          |
| HOXA13  | MAML1   | SPDEF   | 0.1752          | PLA2G10 | SLC7A7    | ULK1    | 0.1759          |



| Gene 1   | Gene 2    | Gene 3  | bresub<br>error | Gene 1   | Gene 2  | Gene 3  | bresub<br>error |
|----------|-----------|---------|-----------------|----------|---------|---------|-----------------|
| BRIX1    | DDIT4     | TSTA3   | 0.1759          | HOXB8    | NOD2    | TSTA3   | 0.1764          |
| PLA2G10  | CYP4F3    | ULK1    | 0.1759          | BRIX1    | DDIT4   | RPSA    | 0.1764          |
| CDK7     | NFKB1     | TSTA3   | 0.1759          | NFKB1    | PDE4C   | TSTA3   | 0.1764          |
| PLCE1    | NFKB1     | TSTA3   | 0.1760          | PPAP2A   | SEPTIN4 | TSTA3   | 0.1764          |
| PLA2G10  | HOXA10    | ULK1    | 0.1760          | SEPTIN4  | SIRT1   | TSTA3   | 0.1764          |
| SEPTIN4  | SLC5A3    | TSTA3   | 0.1760          | PECAM1   | TRAFFD1 | TSTA3   | 0.1764          |
| NFKB2    | TRAFFD1   | TSTA3   | 0.1760          | GEMIN6   | NFKB2   | TSTA3   | 0.1765          |
| FGFR1    | LPAR4     | TSTA3   | 0.1760          | KDM4A    | PLA2G10 | ULK1    | 0.1765          |
| ANGPTL4  | GJB1      | RELA    | 0.1760          | POR      | RAD52   | SEPTIN4 | 0.1765          |
| ANGPTL4  | NOTCH3    | RELA    | 0.1760          | GJC1     | SEPTIN4 | TSTA3   | 0.1765          |
| SLC39A8  | HOXA13    | KCTD17  | 0.1760          | ISL1     | IGF2BP1 | TSTA3   | 0.1765          |
| LEF1     | DDIT4     | TSTA3   | 0.1760          | CDH5     | SEPTIN4 | TSTA3   | 0.1766          |
| CACNA1C  | LEF1      | NFKB1   | 0.1761          | CHGA     | SEPTIN4 | TSTA3   | 0.1766          |
| NOD2     | POR       | ANGPTL4 | 0.1761          | GPX2     | PLA2G10 | SLCO2A1 | 0.1766          |
| ITGAM    | PECAM1    | TSTA3   | 0.1761          | ANGPTL4  | NANOG   | RELA    | 0.1766          |
| POR      | NFKB1     | REG1B   | 0.1761          | POR      | NFKB1   | SLC1A4  | 0.1766          |
| NFKB1    | TNFRSF10A | TSTA3   | 0.1761          | ID3      | SEPTIN4 | TSTA3   | 0.1766          |
| MMP1     | NFKB1     | TSTA3   | 0.1761          | FAM129A  | PPAP2B  | TSTA3   | 0.1766          |
| PLA2G10  | PRKCE     | SLCO2A1 | 0.1761          | BTD      | PECAM1  | TSTA3   | 0.1766          |
| BCL2L1   | NFKB1     | TSTA3   | 0.1761          | IGF2BP1  | PECAM1  | TSTA3   | 0.1766          |
| FGFR1    | PPAP2B    | TSTA3   | 0.1762          | POR      | PRKACA  | NFKB1   | 0.1766          |
| POR      | CDH5      | SEPTIN4 | 0.1762          | BRIX1    | SEPTIN4 | TSTA3   | 0.1766          |
| ANGPTL4  | SEPTIN4   | TFAP2C  | 0.1762          | NOD2     | POR     | GJB1    | 0.1766          |
| PLA2G10  | POU2F3    | ULK1    | 0.1762          | POR      | MALL    | PECAM1  | 0.1767          |
| FGFR1    | PTK7      | TSTA3   | 0.1762          | ANGPTL4  | KCNH2   | RELA    | 0.1767          |
| NFKB2    | WNT4      | TSTA3   | 0.1763          | ACSL4    | ISL1    | TSTA3   | 0.1767          |
| CEACAM19 | SEPTIN4   | TSTA3   | 0.1763          | PLA2G10  | BCL2L13 | SLC2A13 | 0.1767          |
| LEF1     | COL1A2    | NFKB1   | 0.1763          | MAPK7    | RELA    | TSTA3   | 0.1767          |
| NEU3     | SEPTIN4   | TSTA3   | 0.1763          | SLC25A36 | SEPTIN4 | TSTA3   | 0.1768          |
| PLA2G10  | HOXA13    | JAK2    | 0.1763          | PLA2G10  | GCLM    | HOXA13  | 0.1768          |
| POR      | SLC34A2   | SEPTIN4 | 0.1763          | MSI1     | PLA2G10 | CHAC1   | 0.1768          |
| CACNA1C  | FAM129A   | SEPTIN4 | 0.1763          | SEPTIN4  | TSTA3   | ZNF365  | 0.1768          |
| CACNA2D1 | SEPTIN4   | TSTA3   | 0.1763          | PPAP2A   | ANGPTL4 | RELA    | 0.1768          |
| SLC5A9   | NFKB1     | TRAFFD1 | 0.1763          | APC      | IGF2BP1 | TSTA3   | 0.1768          |
| HEY1     | SEPTIN4   | TSTA3   | 0.1763          | PLCB4    | PECAM1  | TSTA3   | 0.1768          |
| ISL1     | PYGO2     | TSTA3   | 0.1764          | NOS1     | POR     | NFKB1   | 0.1769          |
| CDK8     | PLA2G10   | CHAC1   | 0.1764          | PLA2G10  | HMGCR   | HOXA13  | 0.1769          |
| CGNL1    | RELA      | TLR2    | 0.1764          | DOT1L    | FAM129A | TSTA3   | 0.1769          |
| ITGB2    | CDC25B    | IER3    | 0.1764          | NFKB1    | REG1B   | TRAFFD1 | 0.1769          |
| NFKB1    | OGG1      | TIMP3   | 0.1764          | DDIT4    | PROX1   | RPSA    | 0.1769          |
| FOXP4    | GEMIN6    | TSTA3   | 0.1764          | ISL1     | IL23R   | TSTA3   | 0.1769          |

| Gene 1  | Gene 2 | Gene 3  | bresub<br>error | Gene 1  | Gene 2  | Gene 3  | bresub<br>error |
|---------|--------|---------|-----------------|---------|---------|---------|-----------------|
| HOXB8   | POR    | ANGPTL4 | 0.1769          | MALL    | RELA    | TSTA3   | 0.1769          |
| APC     | WNT4   | TSTA3   | 0.1769          | WNT4    | TSTA3   | WNT5A   | 0.1769          |
| FAM129A | ISL1   | TSTA3   | 0.1769          | PRKCH   | NFKB1   | TLR3    | 0.1770          |
| CTDSPL  | NFKB1  | TIMP3   | 0.1769          | POR     | NFKB1   | SLC26A6 | 0.1770          |
| FAM129A | DDX11  | TSTA3   | 0.1769          | PLA2G10 | CHAC1   | FOXD2   | 0.1770          |
| WNT4    | PECAM1 | TSTA3   | 0.1769          | DDIT4   | SEPTIN4 | TSTA3   | 0.1770          |
| LEF1    | NFKB1  | TIMP3   | 0.1769          | PLA2G10 | PLAU    | HOXA13  | 0.1770          |

**Table S14. Frequencies of Top 500 Three-Gene Classifiers.** Frequencies of genes participating in the top 500 three-gene linear discriminant analysis classifiers supplement vs placebo.

| Gene     | Low ENL | High ENL |
|----------|---------|----------|
| ABCC1    | 0       | 1        |
| ABCG5    | 0       | 1        |
| ACADS    | 0       | 2        |
| ACSL4    | 2       | 4        |
| ACTA2    | 1       | 0        |
| ACTG2    | 1       | 0        |
| ADAM17   | 0       | 2        |
| AIFM2    | 0       | 3        |
| ALCAM    | 1       | 0        |
| ALOX15   | 0       | 2        |
| ALPI     | 6       | 2        |
| ANGPTL4  | 48      | 0        |
| APC      | 15      | 0        |
| APEX1    | 0       | 1        |
| AQP11    | 0       | 4        |
| AQP7     | 0       | 2        |
| BAK1     | 0       | 3        |
| BCL2     | 1       | 7        |
| BCL2L1   | 1       | 0        |
| BCL2L13  | 2       | 0        |
| BCL2L14  | 0       | 5        |
| BDKRB2   | 0       | 1        |
| BIRC5    | 0       | 2        |
| BMF      | 0       | 2        |
| BMI1     | 0       | 2        |
| BMP4     | 2       | 3        |
| BRIX1    | 9       | 1        |
| BST1     | 1       | 4        |
| BTD      | 2       | 1        |
| C11orf30 | 1       | 0        |
| CA14     | 0       | 4        |
| CA5B     | 1       | 0        |
| CACNA1C  | 5       | 0        |
| CACNA2D1 | 3       | 1        |
| CACNB4   | 3       | 0        |
| CAV1     | 0       | 1        |
| CCDC80   | 0       | 4        |
| CCL15    | 0       | 1        |
| CCND1    | 2       | 1        |
| CDC25B   | 3       | 0        |
| CDCA7    | 0       | 4        |
| CDH3     | 5       | 0        |
| CDH5     | 3       | 0        |
| CDK2AP1  | 0       | 1        |
| CDK7     | 2       | 0        |
| CDK8     | 7       | 0        |
| CDKAL1   | 0       | 1        |

| Gene     | Low ENL | High ENL |
|----------|---------|----------|
| CDKN1C   | 0       | 8        |
| CEACAM19 | 1       | 3        |
| CEACAM3  | 0       | 1        |
| CGNL1    | 2       | 0        |
| CHAC1    | 6       | 0        |
| CHGA     | 1       | 0        |
| COL1A2   | 11      | 0        |
| COL3A1   | 0       | 3        |
| COX4I1   | 0       | 17       |
| CSPG5    | 1       | 1        |
| CTDSPL   | 8       | 1        |
| CYP4F3   | 3       | 65       |
| DAB2IP   | 1       | 0        |
| DAPK3    | 0       | 4        |
| DCN      | 4       | 0        |
| DDIT4    | 18      | 0        |
| DDR2     | 1       | 0        |
| DDX11    | 1       | 1        |
| DEFA5    | 0       | 5        |
| DEFA6    | 1       | 1        |
| DFFA     | 0       | 2        |
| DHFR     | 0       | 1        |
| DLL1     | 0       | 46       |
| DOT1L    | 3       | 1        |
| DPEP1    | 0       | 7        |
| DPP4     | 0       | 53       |
| DPYSL3   | 0       | 1        |
| DUT      | 0       | 6        |
| ELP3     | 0       | 9        |
| EPHB1    | 0       | 5        |
| EPHB4    | 3       | 4        |
| EPHB6    | 0       | 4        |
| ERBB4    | 0       | 1        |
| ESR1     | 0       | 2        |
| FAM129A  | 25      | 0        |
| FFAR4    | 3       | 0        |
| FGF18    | 0       | 4        |
| FGF5     | 0       | 1        |
| FGFR1    | 15      | 2        |
| FGFR2    | 1       | 0        |
| FGFR3    | 0       | 3        |
| FN1      | 2       | 0        |
| FOXA1    | 0       | 15       |
| FOXD2    | 7       | 0        |
| FOXJ2    | 0       | 6        |
| FO XK2   | 6       | 5        |
| FOXO3    | 2       | 2        |

| Gene    | Low ENL | High ENL |
|---------|---------|----------|
| FOXP4   | 10      | 1        |
| FPR1    | 0       | 3        |
| FUT2    | 1       | 0        |
| GABRB3  | 0       | 5        |
| GCLM    | 1       | 0        |
| GCM1    | 0       | 37       |
| GEMIN6  | 9       | 2        |
| GJB1    | 13      | 1        |
| GJC1    | 5       | 1        |
| GPX1    | 0       | 3        |
| GPX2    | 6       | 0        |
| GRB7    | 1       | 7        |
| GSTA1   | 0       | 3        |
| HAS2    | 0       | 2        |
| HEY1    | 1       | 1        |
| HMGCL   | 1       | 0        |
| HMGCR   | 1       | 0        |
| HMGCS1  | 0       | 2        |
| HOXA10  | 3       | 0        |
| HOXA13  | 46      | 0        |
| HOXA2   | 0       | 2        |
| HOXA9   | 5       | 1        |
| HOXB8   | 4       | 0        |
| HOXC6   | 1       | 1        |
| HOXD1   | 0       | 2        |
| HOXD13  | 2       | 0        |
| HOXD8   | 0       | 2        |
| HSPD1   | 0       | 2        |
| ID3     | 1       | 1        |
| IER3    | 5       | 1        |
| IFNAR1  | 0       | 1        |
| IGF1    | 0       | 4        |
| IGF1R   | 0       | 1        |
| IGF2BP1 | 7       | 0        |
| IL1R2   | 1       | 0        |
| IL23R   | 1       | 0        |
| IL36RN  | 0       | 7        |
| IL4R    | 1       | 0        |
| ILKAP   | 0       | 3        |
| IRF8    | 0       | 1        |
| ISL1    | 29      | 3        |
| ITGAL   | 1       | 2        |
| ITGAM   | 3       | 0        |
| ITGB1   | 0       | 4        |
| ITGB2   | 4       | 4        |
| JAK2    | 4       | 1        |
| KCNH2   | 2       | 0        |

| Gene   | Low ENL | High ENL |
|--------|---------|----------|
| KCTD12 | 0       | 114      |
| KCTD17 | 16      | 0        |
| KDM4A  | 1       | 1        |
| KDM4B  | 5       | 0        |
| KIT    | 1       | 1        |
| KLK6   | 0       | 2        |
| LCT    | 0       | 3        |
| LDHB   | 1       | 0        |
| LEF1   | 11      | 4        |
| LPAR1  | 1       | 7        |
| LPAR4  | 4       | 0        |
| LRIG1  | 0       | 4        |
| LTBP1  | 1       | 0        |
| MALL   | 4       | 1        |
| MAML1  | 17      | 1        |
| MAPK13 | 1       | 36       |
| MAPK14 | 0       | 3        |
| MAPK7  | 2       | 0        |
| MAPK8  | 0       | 1        |
| MEN1   | 0       | 9        |
| MLH1   | 1       | 0        |
| MMP1   | 1       | 145      |
| MMP9   | 0       | 2        |
| MSH3   | 2       | 0        |
| MSI1   | 5       | 2        |
| MYB    | 0       | 1        |
| MYC    | 1       | 0        |
| MYO9B  | 3       | 0        |
| NAIP   | 0       | 1        |
| NANOG  | 7       | 0        |
| NEU3   | 1       | 0        |
| NFKB1  | 78      | 0        |
| NFKB2  | 8       | 1        |
| NOD2   | 10      | 0        |
| NOG    | 0       | 1        |
| NOS1   | 7       | 0        |
| NOS2   | 1       | 10       |
| NOTCH3 | 1       | 0        |
| NOTCH4 | 0       | 1        |
| NPAT   | 0       | 4        |
| NR2C2  | 7       | 2        |
| NR5A2  | 5       | 0        |
| NR6A1  | 0       | 21       |
| NRCAM  | 0       | 10       |
| ODC1   | 0       | 4        |
| OGG1   | 3       | 1        |
| OTUB1  | 0       | 13       |

| Gene    | Low ENL | High ENL |
|---------|---------|----------|
| PARD3   | 0       | 2        |
| PAX6    | 0       | 4        |
| PCDH7   | 0       | 1        |
| PCNA    | 0       | 2        |
| PDE4C   | 3       | 0        |
| PDK1    | 0       | 1        |
| PECAM1  | 33      | 5        |
| PIK3CA  | 2       | 0        |
| PLA2G10 | 83      | 0        |
| PLA2G7  | 0       | 2        |
| PLAU    | 1       | 0        |
| PLCB4   | 4       | 0        |
| PLCE1   | 1       | 0        |
| PLD3    | 0       | 8        |
| PLS3    | 0       | 37       |
| POLB    | 2       | 0        |
| POR     | 44      | 1        |
| POU2F3  | 3       | 1        |
| PPAP2A  | 2       | 1        |
| PPAP2B  | 6       | 0        |
| PPARD   | 0       | 1        |
| PPM1D   | 1       | 1        |
| PRKACA  | 5       | 1        |
| PRKAR1B | 0       | 1        |
| PRKCE   | 7       | 0        |
| PRKCH   | 3       | 1        |
| PRNP    | 0       | 3        |
| PROX1   | 7       | 3        |
| PTAFR   | 3       | 1        |
| PTGFRN  | 1       | 25       |
| PTGIR   | 0       | 278      |
| PTK2    | 0       | 1        |
| PTK7    | 8       | 2        |
| PTPN11  | 0       | 1        |
| PTPN22  | 2       | 4        |
| PYGO2   | 1       | 0        |
| RAD52   | 4       | 0        |
| RASSF1  | 0       | 2        |
| RBBP9   | 0       | 1        |
| RBL1    | 0       | 1        |
| RBL2    | 0       | 19       |
| RBP4    | 1       | 5        |
| RCN3    | 0       | 1        |
| REG1A   | 0       | 11       |
| REG1B   | 2       | 0        |
| REL     | 2       | 2        |
| RELA    | 80      | 1        |



| Gene     | Low ENL | High ENL |
|----------|---------|----------|
| REST     | 6       | 0        |
| RPSA     | 10      | 0        |
| SAT2     | 2       | 1        |
| SEPTIN4  | 89      | 0        |
| SIGIRR   | 0       | 1        |
| SIRT1    | 1       | 0        |
| SLC10A2  | 2       | 1        |
| SLC16A4  | 2       | 0        |
| SLC17A5  | 0       | 1        |
| SLC1A4   | 6       | 0        |
| SLC23A3  | 0       | 1        |
| SLC25A13 | 0       | 1        |
| SLC25A28 | 0       | 2        |
| SLC25A36 | 1       | 0        |
| SLC26A6  | 1       | 0        |
| SLC27A2  | 1       | 1        |
| SLC28A1  | 0       | 14       |
| SLC2A10  | 1       | 0        |
| SLC2A13  | 10      | 1        |
| SLC2A5   | 0       | 2        |
| SLC31A1  | 3       | 0        |
| SLC34A2  | 6       | 4        |
| SLC35A2  | 0       | 1        |
| SLC35B3  | 0       | 1        |
| SLC39A4  | 0       | 26       |
| SLC39A5  | 1       | 7        |
| SLC39A8  | 1       | 0        |
| SLC3A1   | 0       | 4        |
| SLC5A1   | 2       | 0        |
| SLC5A3   | 1       | 0        |
| SLC5A9   | 1       | 2        |
| SLC6A20  | 2       | 0        |
| SLC7A7   | 2       | 1        |
| SLC9A2   | 0       | 13       |
| SLCO2A1  | 3       | 0        |
| SLFN5    | 0       | 3        |
| SORD     | 0       | 1        |
| SPDEF    | 14      | 14       |
| SPI1     | 0       | 2        |
| SST      | 6       | 3        |
| TAT      | 0       | 2        |
| TBRG1    | 0       | 1        |
| TFAP2C   | 3       | 14       |
| TFCP2L1  | 0       | 1        |
| TGFB2    | 3       | 1        |
| TGM2     | 1       | 1        |
| TIMP3    | 5       | 0        |

| Gene      | Low ENL | High ENL |
|-----------|---------|----------|
| TLR2      | 10      | 1        |
| TLR3      | 9       | 0        |
| TLR5      | 3       | 1        |
| TNF       | 1       | 2        |
| TNFRSF10A | 4       | 5        |
| TNFRSF10B | 0       | 2        |
| TNFRSF10D | 0       | 2        |
| TNK2      | 1       | 0        |
| TP53      | 1       | 0        |
| TP63      | 1       | 1        |
| TRAFD1    | 44      | 5        |
| TREH      | 1       | 0        |
| TSC2      | 1       | 5        |
| TSTA3     | 252     | 0        |
| UHRF1     | 0       | 1        |
| ULK1      | 18      | 0        |
| VDR       | 0       | 21       |
| VNN1      | 1       | 0        |
| WNT4      | 16      | 3        |
| WNT5A     | 9       | 5        |
| XIST      | 1       | 5        |
| ZBTB33    | 1       | 0        |
| ZNF365    | 0       | 0        |
